# Supplementary material for: Preparation of chitosan/cellulose composite copper catalyst for green synthesis in the construction of C–Si bonds in aqueous phase
Source: Royal Society of Chemistry journal article supplement (doi:10.1039/d3gc01097j), 2023-01-01

## Preparation of chitosan/cellulose composite copper catalyst for green synthesis in the construction of C-Si bond in aqueous phase

Yaoyao Zhang,<sup>a</sup> Biao Han,<sup>a</sup> Zelang Zhang,<sup>a</sup> Xue Zhao,<sup>a</sup> Weishuang Li,<sup>a</sup> Bojie Li<sup>a</sup> and Lei Zhu<sup>\*a,b</sup>

<sup>(a)</sup> School of Chemistry and Materials Science, Hubei Key Laboratory of Quality Control of Characteristic Fruits And Vegetables, Hubei Engineering University, Xiaogan, 432000, China)

<sup>(b)</sup> Hubei Key Laboratory of Bioinorganic Chemistry & Materia Medica, Huazhong University of Science and Technology, Wuhan 430074, China)

Dedicated to the 80th anniversary celebration of Hubei Engineering University

### 1. Different raw material ratios of chitosan/cellulose composite microspheres

In order to prepare cross-linked-chitosan-cellulose composite microbeads with good morphology, three different ratios of chitosan and cellulose were prepared according to the procedure of 2.3.1 Preparation of the support material. As a result, while the mass ratios of chitosan and cellulose were 2:1 could obtain better morphology of **CC@Cu**, while 1:1 and 3:1 were unable to form a complete sphere.

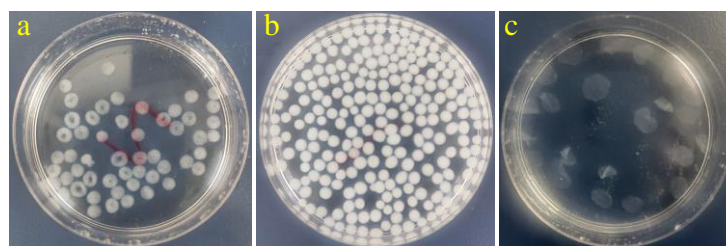

**Fig S1.** (a)chitosan : cellulose =1:1; (b)chitosan : cellulose =2:1; (c)chitosan : cellulose =3:1;

### 2. Proposed mechanism for the reaction of MBH alcohols and quinones

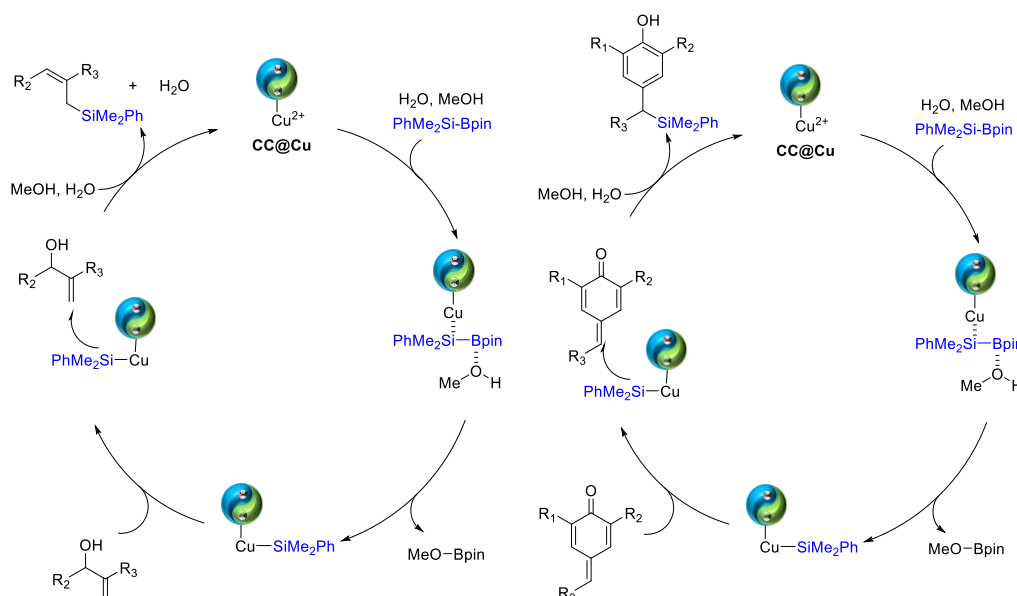

### 3. Characterization data for products

Most of adducts are literature-known and obtained characterization data for these compounds is in full agreement with reported data.

#### 3-(Dimethyl(phenyl)silyl)-1,3-diphenylpropan-1-one 3a

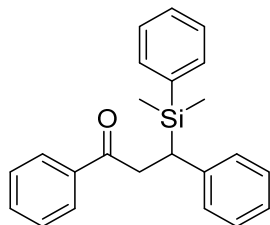

White solid

$^1\text{H}$  NMR (400 MHz, Chloroform-*d*);  $\delta$  = 7.76 – 7.73 (m, 2H), 7.48 – 7.44 (m, 1H), 7.42 – 7.39 (m, 2H), 7.36 – 7.28 (m, 5H), 7.15 – 7.11 (m, 2H), 7.08 – 7.02 (m, 1H), 6.95 – 6.93 (m, 2H), 3.49 (dd,  $J$  = 17.1, 10.2 Hz, 1H), 3.19 – 3.05 (m, 2H), 0.26 (s, 3H), 0.20 (s, 3H).

$^{13}\text{C}$  NMR (100 MHz, Chloroform-*d*);  $\delta$  = 199.1, 142.4, 137.1, 136.9, 134.2, 132.8, 129.4, 128.5, 128.1, 128.0, 127.8, 127.7, 124.8, 39.0, 31.1, – 3.8, – 5.1.

#### 3-(Dimethyl(phenyl)silyl)-1-phenyl-3-(*p*-tolyl)propan-1-one 3b

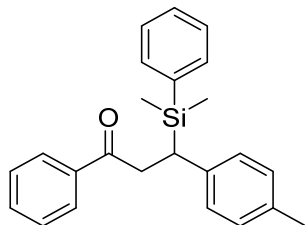

Pale yellow oil

$^1\text{H}$  NMR (400 MHz, Chloroform-*d*);  $\delta$  = 7.79 (d,  $J$  = 7.6 Hz, 2H), 7.52 – 7.46 (m, 3H), 7.40 – 7.33 (m, 5H), 7.00 (d,  $J$  = 7.8 Hz, 2H), 6.89 (d,  $J$  = 7.7 Hz, 2H), 3.49 (dd,  $J$  = 17.0, 10.4 Hz, 1H), 3.21 – 3.04 (m, 2H), 2.27 (s, 3H), 0.30 (s, 3H), 0.23 (s, 3H).

$^{13}\text{C}$  NMR (100 MHz, Chloroform-*d*);  $\delta$  = 199.2, 139.1, 137.10, 137.05, 134.2, 134.1, 132.8, 129.3, 128.9, 128.5, 128.0, 127.8, 127.6, 39.0, 30.6, 21.0, – 3.7, – 5.2.

#### 3-(Dimethyl(phenyl)silyl)-3-(4-methoxyphenyl)-1-phenylpropan-1-one 3c

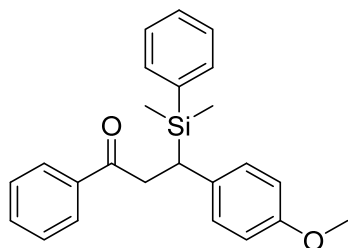

Colorless oil

$^1\text{H}$  NMR (400 MHz, Chloroform-*d*);  $\delta$  = 7.80 – 7.78 (m, 2H), 7.52 – 7.45 (m, 3H), 7.41 – 7.33 (m, 5H), 6.93 – 6.88 (m, 2H), 6.75 – 6.72 (m, 2H), 3.75 (s, 3H), 3.46 (dd,  $J$  = 17.0, 10.5 Hz, 1H), 3.21 – 3.01 (m, 2H), 0.30 (s, 3H), 0.24 (s, 3H).

$^{13}\text{C}$  NMR (100 MHz, Chloroform-*d*);  $\delta$  = 199.4, 157.0, 137.1, 137.0, 134.21, 134.19, 132.8, 129.3, 128.6, 128.5, 128.0, 127.8, 113.6, 55.2, 39.2, 30.1, – 3.8, – 5.2.

### 3-(4-Chlorophenyl)-3-(dimethyl(phenyl)silyl)-1-phenylpropan-1-one 3d

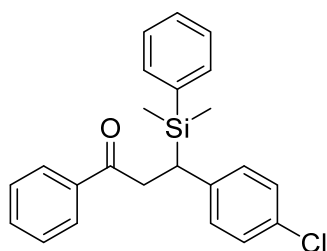

Colorless oil

$^1\text{H}$  NMR (400 MHz, Chloroform-*d*);  $\delta$  = 7.80 – 7.78 (m, 2H), 7.54 – 7.50 (m, 1H), 7.45 – 7.34 (m, 7H), 7.15 – 7.13 (m, 2H), 6.90 – 6.88 (m, 2H), 3.48 (dd,  $J$  = 17.2, 10.6 Hz, 1H), 3.23 – 3.08 (m, 2H), 0.30 (s, 3H), 0.26 (s, 3H).

$^{13}\text{C}$  NMR (100 MHz, Chloroform-*d*);  $\delta$  = 198.8, 141.0, 136.9, 136.3, 134.2, 133.0, 130.4, 129.5, 128.9, 128.6, 128.2, 127.94, 127.90, 38.7, 30.7, – 4.0, – 5.2.

### 3-(4-Bromophenyl)-3-(dimethyl(phenyl)silyl)-1-phenylpropan-1-one 3e

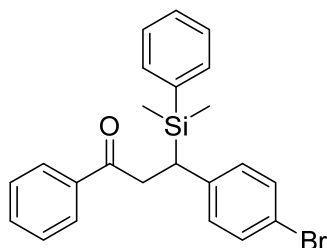

Colorless oil

$^1\text{H}$  NMR (400 MHz, Chloroform-*d*);  $\delta$  = 7.79 – 7.77 (m, 2H), 7.54 – 7.49 (m, 1H), 7.44 – 7.33 (m, 7H), 7.28 – 7.26 (m, 2H), 6.85 – 6.81 (m, 2H), 3.46 (dd,  $J$  = 17.2, 10.6 Hz, 1H), 3.22 – 3.03 (m, 2H), 0.30 (s, 3H), 0.25 (s, 3H).

$^{13}\text{C}$  NMR (100 MHz, Chloroform-*d*);  $\delta$  = 198.7, 141.6, 136.9, 136.3, 134.2, 133.0, 131.1, 129.5, 129.3, 128.5, 127.9, 127.9, 118.4, 38.7, 30.8, – 4.0, – 5.2.

HRMS (ESI<sup>+</sup>) calcd for C<sub>23</sub>H<sub>23</sub>BrOSiNa [M+Na]<sup>+</sup>: 445.0590; found 445.0594.

### 3-(Dimethyl(phenyl)silyl)-1-phenyl-3-(4-(trifluoromethyl)phenyl)propan-1-one 3f

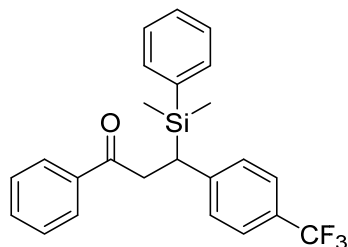

Colorless oil

$^1\text{H}$  NMR (400 MHz, Chloroform-*d*);  $\delta$  = 7.82 – 7.80 (m, 2H), 7.55 – 7.51 (m, 1H), 7.44 – 7.34 (m, 9H), 7.08 (d,  $J$  = 8 Hz, 2H), 3.56 (dd,  $J$  = 17.4, 10.5 Hz, 1H), 3.28 – 3.18 (m, 2H), 0.32 (s, 3H), 0.27 (s, 3H).

$^{13}\text{C}$  NMR (100 MHz, Chloroform-*d*);  $\delta$  = 198.5, 147.0, 136.8, 136.0, 134.1, 133.1, 129.6, 128.6, 128.0, 127.9, 127.7, 127.1, 126.8, 125.8, 125.10, 125.06, 125.03, 124.99, 123.1, 38.5, 31.5, – 4.0, – 5.2.

HRMS (ESI<sup>+</sup>) calcd for C<sub>23</sub>H<sub>23</sub>F<sub>3</sub>OSiNa [M+Na]<sup>+</sup>: 435.1364; found 435.1362.

### 3-(Dimethyl(phenyl)silyl)-1-phenyl-3-(thiophen-2-yl)propan-1-one 3g

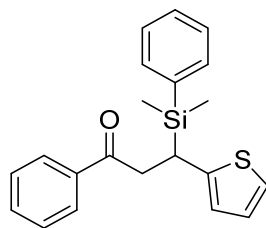

Brown oil

$^1\text{H}$  NMR (400 MHz, Chloroform-*d*);  $\delta$  = 7.81 – 7.79 (m, 2H), 7.53 – 7.48 (m, 3H), 7.41

– 7.33 (m, 5H), 6.97 – 6.96 (m, 1H), 6.85 – 6.83 (m, 1H), 6.60 – 6.59 (m, 1H), 3.48 – 3.41 (m, 2H), 3.20 – 3.12 (m, 1H), 0.39 (s, 3H), 0.31 (s, 3H).

$^{13}\text{C}$  NMR (100 MHz, Chloroform-*d*);  $\delta$  = 198.6, 146.0, 137.0, 136.6, 134.1, 132.9, 129.5, 128.5, 128.0, 127.9, 126.7, 123.1, 121.5, 40.6, 26.2, – 3.8, – 5.1.

HRMS (ESI<sup>+</sup>) calcd for C<sub>21</sub>H<sub>22</sub>OSSiNa [M+Na]<sup>+</sup>: 373.1060; found 373.1053.

### **(*E*)-3-(dimethyl(phenyl)silyl)-1,5-diphenylpent-4-en-1-one 3h**

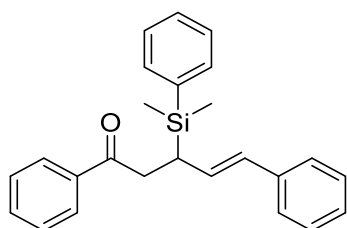

Colorless oil

$^1\text{H}$  NMR (400 MHz, Chloroform-*d*);  $\delta$  = 7.62 – 7.59 (m, 2H), 7.35 – 7.29 (m, 3H), 7.22 – 7.16 (m, 5H), 7.06 – 7.00 (m, 4H), 6.96 – 6.92 (m, 1H), 5.99 – 5.88 (m, 2H), 2.94 – 2.81 (m, 2H), 2.49 – 2.43 (m, 1H), 0.18 (s, 3H), 0.17 (s, 3H).

$^{13}\text{C}$  NMR (100 MHz, Chloroform-*d*);  $\delta$  = 199.5, 138.0, 137.0, 136.8, 134.1, 132.9, 130.7, 129.4, 128.6, 128.4, 128.3, 128.1, 127.9, 126.5, 125.8, 38.2, 29.2, – 4.1, – 5.0.

### **3-(Dimethyl(phenyl)silyl)-1-phenylbutan-1-one 3i**

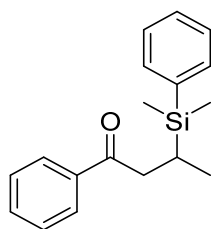

Colorless oil

$^1\text{H}$  NMR (400 MHz, Chloroform-*d*);  $\delta$  = 7.83 – 7.81 (m, 2H), 7.55 – 7.51 (m, 3H), 7.43 – 7.37 (m, 5H), 3.02 (dd,  $J$  = 15.8, 3.3 Hz, 1H), 2.68 – 2.61 (m, 1H), 1.63 – 1.59 (m, 1H), 0.98 (d,  $J$  = 7.3 Hz, 3H), 0.33 (s, 3H), 0.32 (s, 3H).

$^{13}\text{C}$  NMR (100 MHz, Chloroform-*d*);  $\delta$  = 200.7, 137.6, 137.1, 134.0, 132.8, 129.2, 128.5, 128.1, 127.9, 40.7, 15.9, 14.6, – 4.7, – 5.4.

### 3-(Dimethyl(phenyl)silyl)-1-(4-methoxyphenyl)-3-phenylpropan-1-one 3j

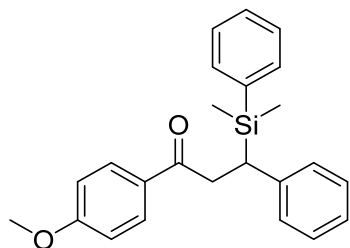

Pale yellow oil

$^1\text{H}$  NMR (400 MHz, Chloroform-*d*);  $\delta$  = 7.83 – 7.77 (m, 2H), 7.46 – 7.44 (m, 2H), 7.39 – 7.33 (m, 3H), 7.19 – 7.15 (m, 2H), 7.08 – 7.04 (m, 1H), 7.00 – 6.97 (m, 2H), 6.88 – 6.84 (m, 2H), 3.84 (s, 3H), 3.49 (dd,  $J$  = 16.6, 10.0 Hz, 1H), 3.18 – 3.09 (m, 2H), 0.30 (s, 3H), 0.24 (s, 3H).

$^{13}\text{C}$  NMR (100 MHz, Chloroform-*d*);  $\delta$  = 197.6, 163.2, 142.5, 136.9, 134.2, 130.3, 130.2, 129.3, 128.1, 127.8, 127.7, 124.8, 113.6, 55.5, 38.5, 31.2, – 3.8, – 5.1.

### 3-(Dimethyl(phenyl)silyl)-1-(4-fluorophenyl)-3-phenylpropan-1-one 3k

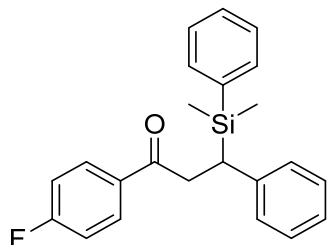

Colorless oil

$^1\text{H}$  NMR (400 MHz, Chloroform-*d*);  $\delta$  = 7.82 – 7.79 (m, 2H), 7.46 – 7.33 (m, 5H), 7.21 – 7.17 (m, 2H), 7.10 – 6.98 (m, 5H), 3.49 (dd,  $J$  = 17.0, 10.3 Hz, 1H), 3.20 – 3.06 (m, 2H), 0.31 (s, 3H), 0.25 (s, 3H).

$^{13}\text{C}$  NMR (100 MHz, Chloroform-*d*);  $\delta$  = 197.6, 166.8, 164.3, 142.2, 136.8, 134.2, 133.5, 133.4, 130.6, 130.5, 129.4, 128.2, 127.8, 127.7, 124.9, 115.6, 115.4, 38.9, 31.2, – 3.8, – 5.4.

HRMS (ESI<sup>+</sup>) calcd for C<sub>23</sub>H<sub>23</sub>FOSiNa [M+Na]<sup>+</sup>: 385.1401; found 385.1394.

### 3-(4-Chlorophenyl)-3-(dimethyl(phenyl)silyl)-1-(*p*-tolyl)propan-1-one 3l

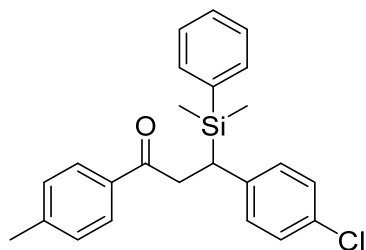

Colorless oil

$^1\text{H}$  NMR (400 MHz, Chloroform-*d*);  $\delta$  = 7.70 – 7.68 (m, 2H), 7.44 – 7.33 (m, 5H), 7.20 – 7.18 (m, 2H), 7.14 – 7.10 (m, 2H), 6.90 – 6.86 (m, 2H), 3.44 (dd,  $J$  = 16.9, 10.4 Hz, 1H), 3.19 – 3.04 (m, 2H), 2.38 (s, 3H), 0.29 (s, 3H), 0.23 (s, 3H).

$^{13}\text{C}$  NMR (100 MHz, Chloroform-*d*);  $\delta$  = 198.4, 143.8, 141.1, 136.4, 134.4, 134.2, 130.3, 129.5, 129.2, 128.9, 128.2, 128.1, 127.9, 38.5, 30.8, 21.7, – 4.0, – 5.2.

HRMS (ESI<sup>+</sup>) calcd for C<sub>24</sub>H<sub>25</sub>ClOSiNa [M+Na]<sup>+</sup>: 415.1260; found 415.1255.

### 3-(4-Chlorophenyl)-3-(dimethyl(phenyl)silyl)-1-(4-fluorophenyl)propan-1-one 3m

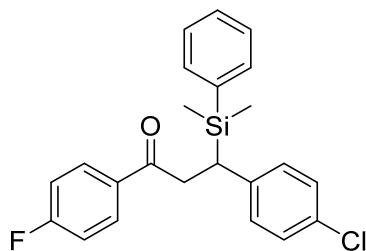

Colorless oil

$^1\text{H}$  NMR (400 MHz, Chloroform-*d*);  $\delta$  = 7.82 – 7.78 (m, 2H), 7.44 – 7.33 (m, 5H), 7.15 – 7.12 (m, 2H), 7.08 – 7.03 (m, 2H), 6.95 – 6.86 (m, 2H), 3.42 (dd,  $J$  = 17.1, 10.6 Hz, 1H), 3.18 – 3.02 (m, 2H), 0.29 (s, 3H), 0.25 (s, 3H).

$^{13}\text{C}$  NMR (100 MHz, Chloroform-*d*);  $\delta$  = 197.2, 166.9, 164.3, 140.9, 136.3, 134.1, 133.30, 133.28, 130.6, 130.51, 130.46, 129.5, 128.8, 128.3, 127.9, 115.7, 115.5, 38.7, 30.8, – 4.0, – 5.3.

### 4-(Dimethyl(phenyl)silyl)-4-phenylbutan-2-one 3n

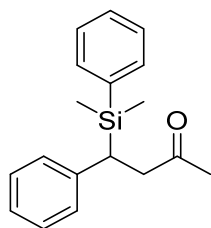

Colorless oil

$^1\text{H}$  NMR (400 MHz, Chloroform-*d*);  $\delta$  = 7.42 – 7.32 (m, 5H), 7.22 – 7.17 (m, 2H), 7.11 – 7.06 (m, 1H), 6.95 – 6.93 (m, 2H), 2.96 – 2.87 (m, 2H), 2.68 – 2.59 (m, 1H), 1.95 (s, 3H), 0.24 (s, 3H), 0.22 (s, 3H).

$^{13}\text{C}$  NMR (100 MHz, Chloroform-*d*);  $\delta$  = 208.3, 142.0, 136.6, 134.2, 129.4, 128.2, 127.8, 127.6, 124.9, 44.0, 31.4, 30.0, – 4.0, – 5.4.

#### 4-(4-Chlorophenyl)-4-(dimethyl(phenyl)silyl)butan-2-one 3o

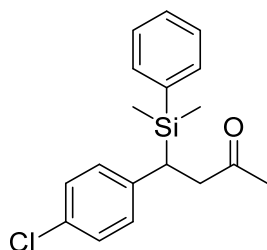

Colorless oil

$^1\text{H}$  NMR (400 MHz, Chloroform-*d*);  $\delta$  = 7.42 – 7.32 (m, 5H), 7.17 – 7.13 (m, 2H), 6.86 – 6.82 (m, 2H), 2.90 – 2.82 (m, 2H), 2.87 – 2.60 (m, 1H), 1.96 (s, 3H), 0.23 (s, 3H), 0.22 (s, 3H).

$^{13}\text{C}$  NMR (100 MHz, Chloroform-*d*);  $\delta$  = 207.7, 140.7, 136.1, 134.1, 130.5, 129.5, 128.8, 128.3, 127.9, 43.8, 30.9, 30.1, – 4.2, – 5.3.

HRMS (ESI<sup>+</sup>) calcd for C<sub>18</sub>H<sub>21</sub>ClOSiNa [M+Na]<sup>+</sup>: 339.0944; found 339.0942.

#### 4-(Dimethyl(phenyl)silyl)pentan-2-one 3p

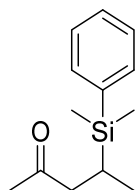

Pale yellow liquid



$^1\text{H}$  NMR (400 MHz, Chloroform-*d*);  $\delta$  = 7.51 – 7.48 (m, 2H), 7.38 – 7.35 (m, 3H), 2.44 – 2.39 (m, 1H), 2.21 – 2.14 (m, 1H), 2.07 (s, 3H), 1.54 – 1.45 (m, 1H), 0.93 (d,  $J$  = 7.3 Hz, 3H), 0.28 (s, 6H).

$^{13}\text{C}$  NMR (100 MHz, Chloroform-*d*);  $\delta$  = 209.5, 137.5, 133.9, 129.1, 127.8, 45.9, 30.0, 15.2, 14.5, – 4.8, – 5.3.

#### 4-(Dimethyl(phenyl)silyl)nonan-2-one 3q

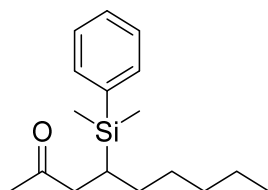

Yellow oil

$^1\text{H}$  NMR (400 MHz, Chloroform-*d*);  $\delta$  = 7.52 – 7.48 (m, 2H), 7.38 – 7.33 (m, 3H), 2.43 – 2.28 (m, 2H), 2.03 (s, 3H), 1.53 – 1.44 (m, 2H), 1.26 – 1.15 (m, 7H), 0.85 – 0.81 (m, 3H), 0.28 (s, 6H).

$^{13}\text{C}$  NMR (100 MHz, Chloroform-*d*);  $\delta$  = 209.3, 138.2, 133.9, 129.0, 127.8, 44.6, 32.1, 30.5, 29.9, 28.9, 22.5, 20.3, 14.1, – 3.8, – 4.3.

#### 4-(Dimethyl(phenyl)silyl)-6-methylhept-5-en-2-one 3r

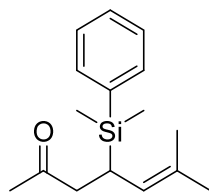

Pale yellow oil

$^1\text{H}$  NMR (400 MHz, Chloroform-*d*);  $\delta$  = 7.49 – 7.47 (m, 2H), 7.38 – 7.32 (m, 3H), 4.85 – 4.81 (m, 1H), 2.46 – 2.25 (m, 3H), 2.01 (s, 3H), 1.67 (s, 3H), 1.50 (s, 3H), 0.28 (s, 3H), 0.26 (s, 3H).

$^{13}\text{C}$  NMR (100 MHz, Chloroform-*d*);  $\delta$  = 209.7, 137.2, 134.0, 130.8, 129.2, 127.7, 123.8, 44.4, 29.6, 25.9, 24.9, 18.1, – 4.4, – 5.4.

#### 3-(Dimethyl(phenyl)silyl)cyclopentan-1-one 3s

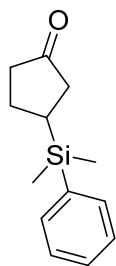

Pale yellow liquid

$^1\text{H}$  NMR (400 MHz, Chloroform-*d*);  $\delta$  = 7.52 – 7.49 (m, 2H), 7.42 – 7.34 (m, 3H), 2.31 – 2.20 (m, 2H), 2.16 – 2.05 (m, 2H), 1.93 – 1.85 (m, 1H), 1.74 – 1.50 (m, 2H), 0.33 (s, 6H).

$^{13}\text{C}$  NMR (100 MHz, Chloroform-*d*);  $\delta$  = 221.3, 137.0, 133.9, 129.4, 128.0, 40.2, 39.4, 25.0, 24.0, – 4.89, – 4.94.

### 3-(Dimethyl(phenyl)silyl)cyclohexan-1-one 3t

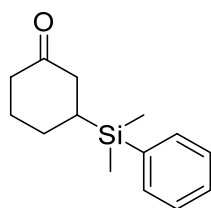

Pale yellow liquid

$^1\text{H}$  NMR (400 MHz, Chloroform-*d*);  $\delta$  = 7.48 – 7.46 (m, 2H), 7.38 – 7.34 (m, 3H), 2.39 – 2.10 (m, 5H), 1.83 – 1.61 (m, 2H), 1.47 – 1.25 (m, 2H), 0.30 (s, 6H).

$^{13}\text{C}$  NMR (100 MHz, Chloroform-*d*);  $\delta$  = 212.8, 136.6, 133.9, 129.3, 127.9, 42.4, 41.9, 29.8, 27.7, 26.1, – 5.3, – 5.4.

### Phenyl 3-(dimethyl(phenyl)silyl)-2-methylpropanoate 3u

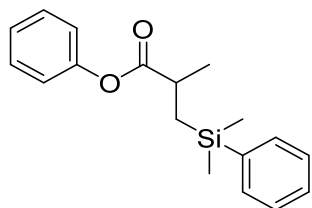

Colorless oil

$^1\text{H}$  NMR (400 MHz, Chloroform-*d*);  $\delta$  = 7.59 – 7.56 (m, 2H), 7.41 – 7.35 (m, 5H), 7.24

– 7.20 (m, 1H), 7.01 – 6.98 (m, 2H), 2.82 – 2.76 (m, 1H), 1.50 – 1.44 (m, 1H), 1.32 (d,  $J = 12.3$  Hz, 3H), 1.09 – 1.03 (m, 1H), 0.39 (s, 6H).

$^{13}\text{C}$  NMR (100 MHz, Chloroform-*d*);  $\delta = 178.4, 153.2, 141.0, 136.0, 131.7, 131.5, 130.3, 128.02, 123.8, 38.3, 27.4, 23.0, 0.1, 0.0$ .

HRMS (ESI<sup>+</sup>) calcd for  $\text{C}_{18}\text{H}_{22}\text{O}_2\text{Si}$   $[\text{M}+\text{Na}]^+$ : 321.1283; found 321.1281.

### Methyl 3-(dimethyl(phenyl)silyl)-2-methylpropanoate **3v**

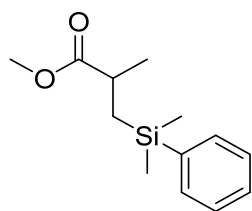

Pale yellow oil

$^1\text{H}$  NMR (400 MHz, Chloroform-*d*);  $\delta = 7.51 – 7.49$  (m, 2H), 7.36 – 7.34 (m, 3H), 3.54 (s, 3H), 2.58 – 2.49 (m, 1H), 1.28 – 1.22 (m, 1H), 1.15 (d,  $J = 6.8$  Hz, 3H), 0.94 (dd,  $J = 7.0, 14.9$  Hz, 1H), 0.29 (d,  $J = 2.5$  Hz, 6H).

$^{13}\text{C}$  NMR (100 MHz, Chloroform-*d*);  $\delta = 177.9, 138.7, 133.6, 129.0, 127.8, 51.5, 35.5, 20.9, 20.7, -2.5, -2.6$ .

### Oxiran-2-ylmethyl 3-(dimethyl(phenyl)silyl)-2-methylpropanoate **3w**

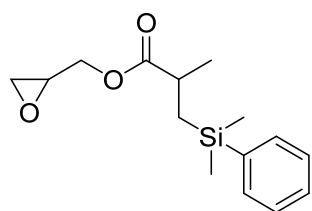

Colorless oil

$^1\text{H}$  NMR (400 MHz, Chloroform-*d*);  $\delta = 7.52 – 7.49$  (m, 2H), 7.37 – 7.34 (m, 3H), 4.29 – 4.20 (m, 1H), 3.80 – 3.71 (m, 1H), 3.16 – 3.11 (m, 1H), 2.83 – 2.81 (m, 1H), 2.61 – 2.55 (m, 2H), 1.33 – 1.27 (m, 1H), 1.17 (d,  $J = 7.0$  Hz, 3H), 0.96 – 0.91 (m, 1H), 0.32 – 0.28 (m, 6H).

$^{13}\text{C}$  NMR (100 MHz, Chloroform-*d*);  $\delta = 179.6, 141.0, 136.0, 131.5, 130.2, 67.3, 51.8, 47.1, 38.0, 23.2, 0.0, -0.1$ .

HRMS (ESI<sup>+</sup>) calcd for C<sub>15</sub>H<sub>22</sub>O<sub>3</sub>Si [M+Na]<sup>+</sup>: 301.1226; found 301.1230.

### Phenyl 3-(dimethyl(phenyl)silyl)propanoate 3x

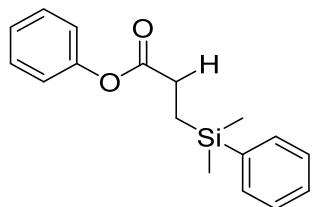

Colorless oil

<sup>1</sup>H NMR (400 MHz, Chloroform-*d*);  $\delta$  = 7.57 – 7.54 (m, 2H), 7.41 – 7.35 (m, 5H), 7.24 – 7.20 (m, 1H), 7.05 – 7.03 (m, 2H), 2.56 – 2.52 (m, 2H), 1.25 – 1.21 (m, 2H), 0.69 (s, 6H).

<sup>13</sup>C NMR (100 MHz, Chloroform-*d*);  $\delta$  = 173.5, 150.8, 138.0, 133.7, 129.4, 129.3, 128.0, 125.7, 121.5, 29.1, 10.9, – 3.2.

HRMS (ESI<sup>+</sup>) calcd for C<sub>17</sub>H<sub>20</sub>O<sub>2</sub>Si [M+Na]<sup>+</sup>: 307.1121; found 307.1125.

### Benzyl 3-(dimethyl(phenyl)silyl)propanoate 3y

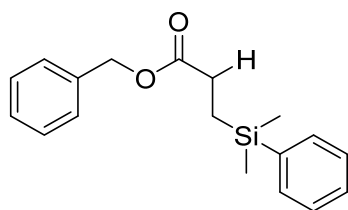

Colorless oil

<sup>1</sup>H NMR (400 MHz, Chloroform-*d*);  $\delta$  = 7.50 – 7.48 (m, 2H), 7.36 – 7.33 (m, 8H), 5.06 (s, 2H), 2.35 – 2.31 (m, 2H), 1.13 – 1.09 (m, 2H), 0.28 (s, 6H).

<sup>13</sup>C NMR (100 MHz, Chloroform-*d*);  $\delta$  = 174.8, 138.1, 136.0, 133.6, 129.1, 128.6, 128.3, 128.2, 127.9, 66.3, 28.9, 25.0, 10.8, – 3.3.

### Methyl 2-acetamido-3-(dimethyl(phenyl)silyl)propanoate 3z

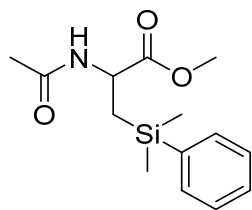

Colorless oil

$^1\text{H}$  NMR (400 MHz, Chloroform-*d*);  $\delta$  = 7.50 – 7.48 (m, 2H), 7.39 – 7.36 (m, 3H), 5.64 – 5.62 (m, 1H), 4.64 – 4.58 (m, 1H), 3.57 (s, 3H), 1.72 (m, 3H), 1.42 – 1.36 (m, 1H), 1.26 – 1.20 (m, 1H), 0.35 (s, 3H), 0.32 (s, 3H).

$^{13}\text{C}$  NMR (100 MHz, Chloroform-*d*);  $\delta$  = 174.0, 169.5, 138.1, 133.5, 129.4, 128.1, 52.2, 49.3, 22.9, 20.2, – 2.8, – 3.2.

### 3-(Dimethyl(phenyl)silyl)-3-phenylpropanal 3A

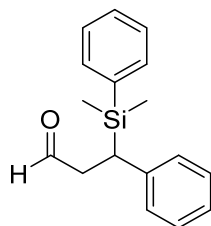

Colorless oil

$^1\text{H}$  NMR (400 MHz, Chloroform-*d*);  $\delta$  = 9.54 – 9.53 (m, 1H), 7.42 – 7.33 (m, 5H), 7.23 – 7.19 (m, 2H), 7.13 – 7.09 (m, 1H), 6.96 – 6.94 (m, 2H), 2.91 – 2.83 (m, 2H), 2.67 – 2.59 (m, 1H), 0.27 (d,  $J$  = 11.4 Hz, 6H).

$^{13}\text{C}$  NMR (100 MHz, Chloroform-*d*);  $\delta$  = 202.7, 141.1, 136.2, 134.1, 129.5, 128.3, 127.9, 127.7, 125.2, 43.5, 30.1, – 4.2, – 5.5.

### 3-(Dimethyl(phenyl)silyl)-3-(*p*-tolyl)propanal 3B

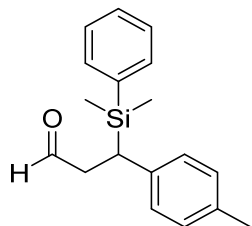

Colorless oil

$^1\text{H}$  NMR (400 MHz, Chloroform-*d*);  $\delta$  = 9.53 – 9.52 (m, 1H), 7.42 – 7.33 (m, 5H), 7.04

– 7.01 (m, 2H), 6.86 – 6.83 (m, 2H), 2.87 – 2.79 (m, 2H), 2.63 – 2.57 (m, 1H), 2.29 (s, 3H), 0.26 (d,  $J = 11.4$  Hz, 6H).

$^{13}\text{C}$  NMR (100 MHz, Chloroform-*d*);  $\delta = 202.9, 137.8, 136.4, 134.6, 134.1, 129.5, 129.1, 127.9, 127.5, 43.5, 29.6, 21.0, -4.1, -5.6$ .

### 3-(Dimethyl(phenyl)silyl)butanal 3C

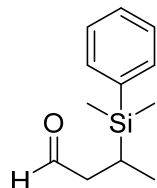

Pale yellow liquid

$^1\text{H}$  NMR (400 MHz, Chloroform-*d*);  $\delta = 9.67 - 9.66$  (m, 1H), 7.51 – 7.48 (m, 2H), 7.40 – 7.34 (m, 3H), 2.45 – 2.40 (m, 1H), 2.19 – 2.11 (m, 1H), 1.53 – 1.47 (m, 1H), 0.99 (d,  $J = 7.4$  Hz, 3H), 0.30 (d,  $J = 2.2$  Hz, 6H).

$^{13}\text{C}$  NMR (100 MHz, Chloroform-*d*);  $\delta = 203.5, 137.0, 133.9, 129.3, 127.9, 45.9, 14.6, 13.8, -4.9, -5.4$ .

### 3-(Dimethyl(phenyl)silyl)-3-phenylpropanenitrile 3D

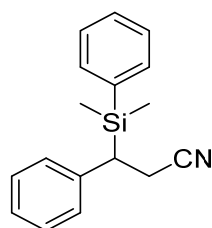

Pale yellow oil

$^1\text{H}$  NMR (400 MHz, Chloroform-*d*);  $\delta = 7.43 - 7.37$  (m, 6H), 7.28 – 7.27 (m, 1H), 7.20 – 7.16 (m, 1H), 6.97 – 6.94 (m, 2H), 2.67 – 2.60 (m, 3H), 0.28 (s, 6H).

$^{13}\text{C}$  NMR (100 MHz, Chloroform-*d*);  $\delta = 139.7, 135.2, 134.1, 129.9, 128.6, 128.1, 127.4, 126.0, 119.7, 33.0, 18.9, -4.0, -5.5$ .

### 3-(Dimethyl(phenyl)silyl)butanenitrile 3E

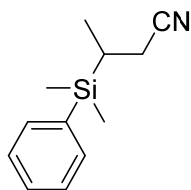

Colorless oil

$^1\text{H}$  NMR (400 MHz, Chloroform-*d*);  $\delta$  = 7.49 – 7.47 (m, 2H), 7.42 – 7.37 (m, 3H), 2.42 – 2.37 (m, 1H), 2.11 – 2.04 (m, 1H), 1.27 – 1.23 (m, 1H), 1.17 – 1.15 (m, 3H), 0.35 (s, 6H).

$^{13}\text{C}$  NMR (100 MHz, Chloroform-*d*);  $\delta$  = 135.9, 133.8, 129.6, 128.1, 119.9, 20.5, 17.3, 14.5, – 4.9, – 5.6.

### 3-(Dimethyl(phenyl)silyl)propanenitrile 3F

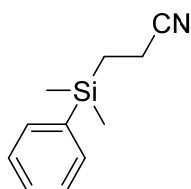

Colorless oil

$^1\text{H}$  NMR (400 MHz, Chloroform-*d*);  $\delta$  = 7.50 – 7.47 (m, 2H), 7.41 – 7.37 (m, 3H), 2.29 – 2.25 (m, 2H), 1.17 – 1.13 (m, 2H), 0.36 (s, 6H).

$^{13}\text{C}$  NMR (100 MHz, Chloroform-*d*);  $\delta$  = 136.6, 133.5, 129.6, 128.2, 121.2, 12.2, 12.0, – 3.5.

### Dimethyl(2-nitro-1-phenylethyl)(phenyl)silane 3G

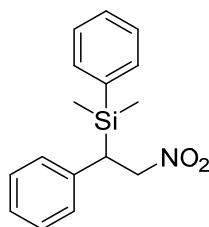

Pale yellow oil

$^1\text{H}$  NMR (400 MHz, Chloroform-*d*);  $\delta$  = 7.45 – 7.36 (m, 5H), 7.25 – 7.22 (m, 2H), 7.18 – 7.14 (m, 1H), 6.99 – 6.97 (m, 2H), 4.86 (t,  $J$  = 13.4 Hz, 1H), 4.52 (dd,  $J$  = 13.6, 3.8 Hz, 1H), 3.28 – 3.24 (m, 1H), 0.30 (s, 3H), 0.28 (s, 3H).

$^{13}\text{C}$  NMR (100 MHz, Chloroform-*d*);  $\delta = 137.5, 134.9, 133.9, 130.0, 128.6, 128.2, 127.3, 126.1, 77.1, 36.1, -3.9, -5.4$ .

### Dimethyl(2-nitro-1-(*p*-tolyl)ethyl)(phenyl)silane 3H

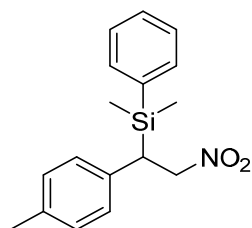

Pale yellow oil

$^1\text{H}$  NMR (400 MHz, Chloroform-*d*);  $\delta = 7.46 - 7.37$  (m, 5H), 7.10 – 7.04 (m, 2H), 6.89 – 6.86 (m, 2H), 4.83 (t,  $J = 13.5$  Hz, 1H), 4.50 (dd,  $J = 13.5, 3.8$  Hz, 1H), 3.26 – 3.20 (m, 1H), 2.29 (m, 3H), 0.30 (s, 3H), 0.28 (s, 3H).

$^{13}\text{C}$  NMR (100 MHz, Chloroform-*d*);  $\delta = 135.6, 135.1, 134.3, 134.0, 130.0, 129.3, 128.2, 127.2, 77.1, 35.7, 21.0, -3.9, -5.5$ .

### (1-(4-Isopropylphenyl)-2-nitroethyl)dimethyl(phenyl)silane 3I

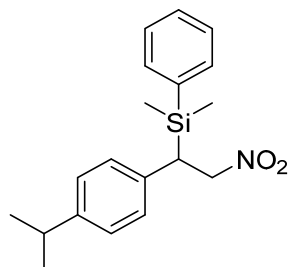

Pale yellow oil

$^1\text{H}$  NMR (400 MHz, Chloroform-*d*);  $\delta = 7.45 - 7.36$  (m, 5H), 7.10 – 7.07 (m, 2H), 6.92 – 6.88 (m, 2H), 4.84 (t,  $J = 13.5$  Hz, 1H), 4.49 (dd,  $J = 13.6, 3.8$  Hz, 1H), 3.27 – 3.21 (m, 1H), 2.88 – 2.81 (m, 1H), 1.22 (d,  $J = 7.0$  Hz, 6H), 0.30 (s, 3H), 0.27 (s, 3H).

$^{13}\text{C}$  NMR (100 MHz, Chloroform-*d*);  $\delta = 146.5, 135.2, 134.5, 133.9, 130.0, 128.2, 127.2, 126.6, 77.1, 35.6, 33.6, 24.0, -3.8, -5.5$ .

HRMS (ESI<sup>+</sup>) calcd for  $\text{C}_{19}\text{H}_{25}\text{NO}_2\text{SiNa}$  [ $\text{M}+\text{Na}$ ]<sup>+</sup>: 350.1548; found 350.1547.

### (1-(3-Fluorophenyl)-2-nitroethyl)dimethyl(phenyl)silane 3J



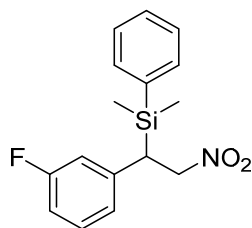

Pale yellow oil

$^1\text{H}$  NMR (400 MHz, Chloroform-*d*);  $\delta$  = 7.46 – 7.39 (m, 5H), 7.23 – 7.18 (m, 1H), 6.88 – 6.83 (m, 1H), 6.77 – 6.74 (m, 1H), 6.69 – 6.65 (m, 1H), 4.81 (t,  $J$  = 13.6 Hz, 1H), 4.52 (dd,  $J$  = 13.8, 3.7 Hz, 1H), 3.30 – 3.24 (m, 1H), 0.32 (d,  $J$  = 2.0 Hz, 6H).

$^{13}\text{C}$  NMR (100 MHz, Chloroform-*d*);  $\delta$  = 164.1, 161.7, 140.4, 140.3, 134.3, 133.9, 130.2, 130.1, 130.0, 128.3, 122.93, 122.90, 114.4, 114.1, 113.2, 113.0, 76.6, 36.14, 36.12, – 4.0, – 5.4.

HRMS (ESI<sup>+</sup>) calcd for  $\text{C}_{16}\text{H}_{18}\text{FNO}_2\text{SiNa}$  [ $\text{M}+\text{Na}$ ]<sup>+</sup>: 326.0981; found 326.0983.

### Dimethyl(phenyl)(2-(phenylsulfonyl)ethyl)silane 3K

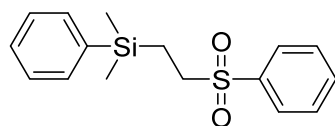

White solid

$^1\text{H}$  NMR (400 MHz, Chloroform-*d*);  $\delta$  = 7.74 – 7.72 (m, 2H), 7.54 – 7.48 (m, 1H), 7.46 – 7.40 (m, 2H), 7.28 – 7.21 (m, 5H), 2.85 – 2.81 (m, 2H), 1.05 – 1.01 (m, 2H), 0.15 (s, 6H).

$^{13}\text{C}$  NMR (100 MHz, Chloroform-*d*);  $\delta$  = 138.6, 136.5, 133.6, 133.4, 129.6, 129.2, 128.2, 128.1, 52.5, 8.5, – 3.4.

### Methyl (Z)-2-((dimethyl(phenyl)silyl)methyl)-3-phenylacrylate 5a

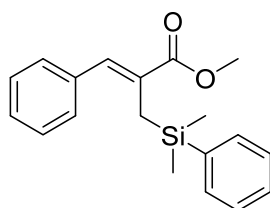

Colorless oil

$^1\text{H}$  NMR (400 MHz, Chloroform-*d*);  $\delta$  = 7.56 (s, 1H), 7.49 – 7.46 (m, 2H), 7.37 – 7.27 (m, 8H), 3.71 (s, 3H), 2.41 (s, 2H), 0.27 (s, 6H).

$^{13}\text{C}$  NMR (100 MHz, Chloroform-*d*);  $\delta$  = 169.3, 138.6, 136.3, 135.7, 133.6, 130.9, 129.09, 129.05, 128.3, 127.8, 127.7, 51.9, 17.4, – 2.6.

### Methyl (Z)-2-((dimethyl(phenyl)silyl)methyl)-3-(*o*-tolyl)acrylate 5b

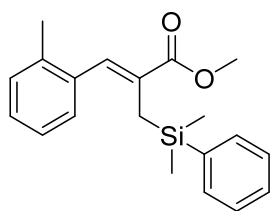

Colorless oil

$^1\text{H}$  NMR (400 MHz, Chloroform-*d*);  $\delta$  = 7.50 (s, 1H), 7.32 – 7.29 (m, 2H), 7.25 – 7.18 (m, 3H), 7.12 – 7.09 (m, 2H), 7.06 – 7.00 (m, 2H), 3.64 (s, 3H), 2.18 (s, 2H), 2.14 (s, 3H), 0.13 (s, 6H).

$^{13}\text{C}$  NMR (100 MHz, Chloroform-*d*);  $\delta$  = 169.1, 138.6, 136.6, 135.6, 135.3, 133.5, 131.4, 130.1, 128.9, 128.4, 127.8, 127.7, 125.5, 51.8, 19.9, 17.0, – 2.6.

HRMS (ESI<sup>+</sup>) calcd for C<sub>23</sub>H<sub>23</sub>BrOSiNa [M+Na]<sup>+</sup>: 347.1434; found 347.1438.

### Methyl (Z)-3-(2-chlorophenyl)-2-((dimethyl(phenyl)silyl)methyl)acrylate 5c

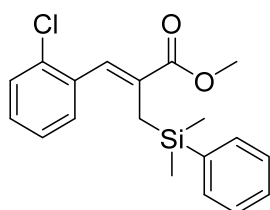

Colorless oil

$^1\text{H}$  NMR (400 MHz, Chloroform-*d*);  $\delta$  = 7.56 (s, 1H), 7.42 – 7.27 (m, 6H), 7.22 – 7.11 (m, 3H), 3.71 (s, 3H), 2.26 (s, 2H), 0.20 (s, 6H).

$^{13}\text{C}$  NMR (100 MHz, Chloroform-*d*);  $\delta$  = 168.7, 138.4, 135.0, 134.0, 133.5, 132.9, 132.8, 129.9, 129.6, 129.01, 128.97, 127.7, 126.4, 52.0, 17.3, – 2.8.

HRMS (ESI<sup>+</sup>) calcd for C<sub>23</sub>H<sub>23</sub>BrOSiNa [M+Na]<sup>+</sup>: 367.0885; found 367.0892.

**Methyl (Z)-2-((dimethyl(phenyl)silyl)methyl)-3-(2-(trifluoromethyl)phenyl)acrylate 5d**

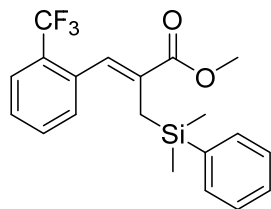

Colorless oil

$^1\text{H}$  NMR (400 MHz, Chloroform-*d*);  $\delta$  = 7.69 (s, 1H), 7.67 – 7.64 (m, 1H), 7.42 – 7.28 (m, 7H), 7.20 – 7.17 (m, 1H), 3.73 (s, 3H), 2.21 (s, 2H), 0.22 (s, 6H).

$^{13}\text{C}$  NMR (100 MHz, Chloroform-*d*);  $\delta$  = 168.6, 138.5, 135.04, 135.02, 133.5, 132.2, 131.4, 130.2, 129.0, 128.7, 128.4, 127.7, 127.6, 126.1, 126.1, 126.01, 125.96, 125.3, 122.6, 52.1, 17.6, – 2.7.

HRMS (ESI<sup>+</sup>) calcd for C<sub>23</sub>H<sub>23</sub>BrOSiNa [M+Na]<sup>+</sup>: 401.1152; found 401.1155.

**Methyl (Z)-2-((dimethyl(phenyl)silyl)methyl)-3-(*m*-tolyl)acrylate 5e**

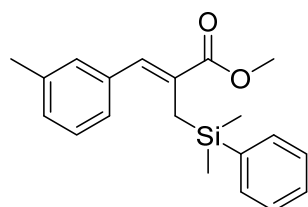

Colorless oil

$^1\text{H}$  NMR (400 MHz, Chloroform-*d*);  $\delta$  = 7.51 (s, 1H), 7.47 – 7.45 (m, 2H), 7.36 – 7.29 (m, 3H), 7.23 – 7.19 (m, 1H), 6.89 – 6.87 (m, 1H), 6.82 – 6.79 (m, 2H), 3.73 (s, 3H), 3.68 (s, 3H), 2.41 (s, 2H), 0.26 (s, 6H).

$^{13}\text{C}$  NMR (100 MHz, Chloroform-*d*);  $\delta$  = 171.7, 162.0, 141.1, 140.2, 138.0, 136.1, 133.7, 131.8, 131.5, 130.2, 124.0, 116.9, 116.1, 57.7, 54.4, 20.0, 0.0.

**Methyl (Z)-2-((dimethyl(phenyl)silyl)methyl)-3-(3-methoxyphenyl)acrylate 5f**

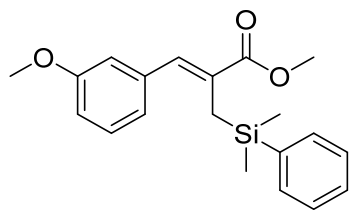

Colorless oil

$^1\text{H}$  NMR (400 MHz, Chloroform-*d*);  $\delta$  = 7.52 (s, 1H), 7.49 – 7.46 (m, 2H), 7.39 – 7.29 (m, 3H), 7.20 – 7.16 (m, 1H), 7.09 – 7.05 (m, 3H), 3.70 (s, 3H), 2.39 (s, 2H), 2.25 (s, 3H), 0.27 (s, 6H).

$^{13}\text{C}$  NMR (100 MHz, Chloroform-*d*);  $\delta$  = 171.9, 141.2, 140.4, 138.6, 138.3, 136.1, 133.1, 132.2, 131.5, 131.1, 130.7, 130.2, 128.8, 54.4, 23.8, 20.0, 0.0.

HRMS (ESI<sup>+</sup>) calcd for C<sub>23</sub>H<sub>23</sub>BrOSiNa [M+Na]<sup>+</sup>: 363.1380; found 363.1387.

### Methyl (Z)-3-(3-bromophenyl)-2-((dimethyl(phenyl)silyl)methyl)acrylate 5g

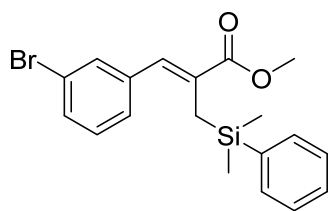

Colorless oil

$^1\text{H}$  NMR (400 MHz, Chloroform-*d*);  $\delta$  = 7.46 – 7.42 (m, 3H), 7.39 – 7.29 (m, 5H), 7.15 – 7.11 (m, 2H), 3.70 (s, 3H), 2.53 (s, 2H), 0.27 (s, 6H).

$^{13}\text{C}$  NMR (100 MHz, Chloroform-*d*);  $\delta$  = 168.9, 138.4, 138.1, 133.8, 133.6, 132.4, 131.7, 130.7, 129.8, 129.2, 127.8, 127.6, 122.4, 52.0, 17.8, – 2.6.

HRMS (ESI<sup>+</sup>) calcd for C<sub>23</sub>H<sub>23</sub>BrOSiNa [M+Na]<sup>+</sup>: 411.0386; found 411.0386.

### Methyl (Z)-2-((dimethyl(phenyl)silyl)methyl)-3-(*p*-tolyl)acrylate 5h

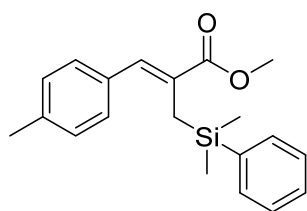

Colorless oil

$^1\text{H}$  NMR (400 MHz, Chloroform-*d*);  $\delta$  = 7.53 (s, 1H), 7.49 – 7.47 (m, 2H), 7.38 – 7.31 (m, 3H), 7.20 – 7.18 (m, 2H), 7.10 – 7.08 (m, 2H), 3.68 (s, 3H), 2.41 (s, 2H), 2.34 (s, 3H), 0.27 (s, 6H).

$^{13}\text{C}$  NMR (100 MHz, Chloroform-*d*);  $\delta$  = 169.5, 138.8, 137.9, 135.7, 133.6, 133.4, 130.0, 129.2, 129.1, 129.0, 127.7, 51.9, 21.3, 17.5, – 2.5.

### Methyl (Z)-2-((dimethyl(phenyl)silyl)methyl)-3-(4-ethylphenyl)acrylate **5i**

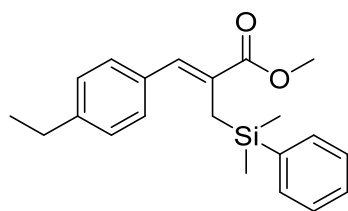

Colorless oil

$^1\text{H}$  NMR (400 MHz, Chloroform-*d*);  $\delta$  = 7.54 (s, 1H), 7.51 – 7.47 (m, 2H), 7.38 – 7.31 (m, 3H), 7.24 – 7.22 (m, 2H), 7.14 – 7.12 (m, 2H), 3.70 (s, 3H), 2.68 (dd,  $J$  = 15.2, 7.6 Hz, 2H), 2.42 (s, 2H), 1.27 (t,  $J$  = 7.6 Hz, 3H), 0.28 (s, 6H).

$^{13}\text{C}$  NMR (100 MHz, Chloroform-*d*);  $\delta$  = 169.5, 144.2, 138.8, 135.8, 133.61, 133.59, 130.0, 129.3, 129.0, 127.8, 127.7, 51.9, 28.7, 17.5, 15.4, – 2.5.

HRMS (ESI<sup>+</sup>) calcd for C<sub>23</sub>H<sub>23</sub>BrOSiNa [M+Na]<sup>+</sup>: 361.1594; found 361.1594.

### Methyl (Z)-3-(4-(*tert*-butyl)phenyl)-2-((dimethyl(phenyl)silyl)methyl)acrylate **5j**

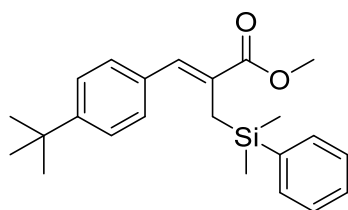

Colorless oil

$^1\text{H}$  NMR (400 MHz, Chloroform-*d*);  $\delta$  = 7.50 (s, 1H), 7.46 – 7.44 (m, 2H), 7.32 – 7.26 (m, 5H), 7.23 – 7.20 (m, 2H), 3.65 (s, 3H), 2.39 (s, 2H), 1.29 (s, 9H), 0.25 (s, 6H).

$^{13}\text{C}$  NMR (100 MHz, Chloroform-*d*);  $\delta$  = 172.0, 153.5, 141.3, 138.1, 136.1, 135.8, 132.5, 131.53, 131.47, 130.2, 127.7, 54.3, 37.1, 33.7, 19.9, 0.0.

HRMS (ESI<sup>+</sup>) calcd for C<sub>23</sub>H<sub>23</sub>BrOSiNa [M+Na]<sup>+</sup>: 389.1902; found 389.1907.

**Methyl (Z)-2-((dimethyl(phenyl)silyl)methyl)-3-(4-methoxyphenyl)acrylate 5k**

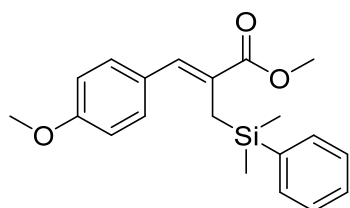

Colorless oil

$^1\text{H}$  NMR (400 MHz, Chloroform-*d*);  $\delta$  = 7.45 – 7.42 (m, 3H), 7.30 – 7.27 (m, 3H), 7.21 – 7.19 (m, 2H), 6.76 – 6.74 (m, 2H), 3.75 (s, 3H), 3.62 (s, 3H), 2.35 (s, 2H), 0.21 (s, 6H).

$^{13}\text{C}$  NMR (100 MHz, Chloroform-*d*);  $\delta$  = 169.6, 159.3, 138.8, 135.4, 133.6, 130.8, 129.0, 128.8, 128.7, 127.8, 113.8, 55.3, 51.9, 17.4, –2.5.

**Methyl (Z)-3-(4-chlorophenyl)-2-((dimethyl(phenyl)silyl)methyl)acrylate 5l**

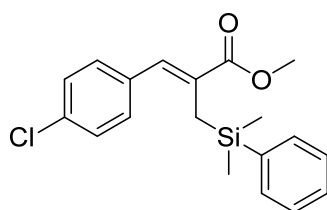

Colorless oil

$^1\text{H}$  NMR (400 MHz, Chloroform-*d*);  $\delta$  = 7.46 (s, 1H), 7.45 – 7.42 (m, 2H), 7.38 – 7.30 (m, 3H), 7.24 – 7.20 (m, 2H), 7.16 – 7.12 (m, 2H), 3.70 (s, 3H), 2.35 (s, 2H), 0.26 (s, 6H).

$^{13}\text{C}$  NMR (100 MHz, Chloroform-*d*);  $\delta$  = 169.1, 138.3, 134.7, 134.2, 133.5, 131.6, 130.3, 129.2, 128.5, 127.8, 52.0, 17.7, – 2.6.

**Methyl (Z)-3-(4-bromophenyl)-2-((dimethyl(phenyl)silyl)methyl)acrylate 5m**

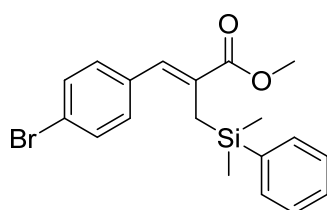

Colorless oil

$^1\text{H}$  NMR (400 MHz, Chloroform-*d*);  $\delta$  = 7.44 – 7.42 (m, 3H), 7.39 – 7.30 (m, 5H), 7.08 – 7.06 (m, 2H), 3.70 (s, 3H), 2.35 (s, 2H), 0.26 (s, 6H).

$^{13}\text{C}$  NMR (100 MHz, Chloroform-*d*);  $\delta$  = 169.1, 138.3, 135.1, 134.2, 133.5, 131.7, 131.5, 130.6, 129.2, 127.8, 121.8, 52.0, 17.7, –2.6.

**Methyl (Z)-2-((dimethyl(phenyl)silyl)methyl)-3-(4-(trifluoromethyl)phenyl)acrylate 5n**

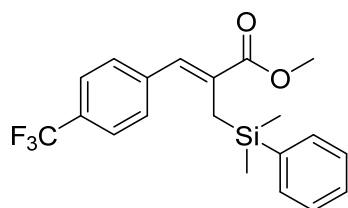

Colorless oil

$^1\text{H}$  NMR (400 MHz, Chloroform-*d*);  $\delta$  = 7.48 – 7.46 (m, 3H), 7.39 – 7.36 (m, 2H), 7.32 – 7.24 (m, 5H), 3.70 (s, 3H), 2.34 (s, 2H), 0.24 (s, 6H).

$^{13}\text{C}$  NMR (100 MHz, Chloroform-*d*);  $\delta$  = 168.8, 139.9, 138.0, 133.8, 133.5, 133.1, 129.6, 129.2, 129.1, 127.8, 125.4, 125.3, 125.23, 125.19, 125.2, 122.7, 52.1, 17.8, –2.7.

HRMS (ESI<sup>+</sup>) calcd for C<sub>23</sub>H<sub>23</sub>BrOSiNa [M+Na]<sup>+</sup>: 401.1152; found 401.1155.

**Methyl (Z)-2-((dimethyl(phenyl)silyl)methyl)-3-(2,4-dimethylphenyl)acrylate 5o**

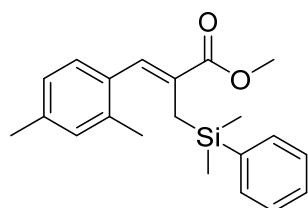

Colorless oil

$^1\text{H}$  NMR (400 MHz, Chloroform-*d*);  $\delta$  = 7.56 (s, 1H), 7.41 – 7.38 (m, 2H), 7.36 – 7.28 (m, 3H), 7.03 – 7.00 (m, 2H), 6.92 – 6.89 (m, 1H), 3.70 (s, 3H), 2.32 (s, 3H), 2.26 (s, 2H), 2.19 (s, 3H), 0.21 (s, 6H).

$^{13}\text{C}$  NMR (100 MHz, Chloroform-*d*);  $\delta$  = 169.2, 138.8, 137.6, 136.6, 135.3, 133.6, 132.6, 130.9, 130.8, 128.9, 128.3, 127.7, 126.2, 51.8, 21.2, 19.9, 17.0, –2.6.

HRMS (ESI<sup>+</sup>) calcd for C<sub>23</sub>H<sub>23</sub>BrOSiNa [M+Na]<sup>+</sup>: 361.1589; found 361.1594.

**Methyl (Z)-3-(3,4-dimethoxyphenyl)-2-((dimethyl(phenyl)silyl)methyl)acrylate 5p**

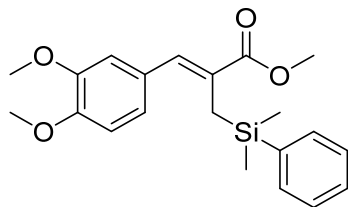

Colorless oil

<sup>1</sup>H NMR (400 MHz, Chloroform-*d*);  $\delta$  = 7.50 – 7.46 (m, 3H), 7.36 – 7.29 (m, 3H), 6.93 – 6.90 (m, 1H), 6.82 – 6.76 (m, 2H), 3.88 (s, 3H), 3.72 (s, 3H), 3.69 (s, 3H), 2.44 (s, 2H), 0.28 (s, 6H).

<sup>13</sup>C NMR (100 MHz, Chloroform-*d*);  $\delta$  = 171.9, 151.3, 151.0, 141.2, 138.0, 136.0, 131.49, 131.46, 131.4, 130.2, 124.9, 114.8, 113.2, 58.3, 58.2, 54.3, 19.9, 0.0.

HRMS (ESI<sup>+</sup>) calcd for C<sub>23</sub>H<sub>23</sub>BrOSiNa [M+Na]<sup>+</sup>: 393.1491; found 393.1493.

**Methyl (Z)-2-((dimethyl(phenyl)silyl)methyl)-3-(3,4,5-trimethoxyphenyl)acrylate 5q**

**5q**

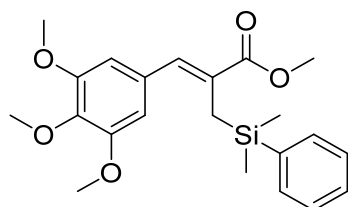

Colorless oil

<sup>1</sup>H NMR (400 MHz, Chloroform-*d*);  $\delta$  = 7.47 – 7.44 (m, 3H), 7.33 – 7.28 (m, 3H), 6.50 (s, 2H), 3.84 (s, 3H), 3.70 (s, 3H), 3.69 (s, 6H), 2.45 (s, 2H), 0.29 (s, 6H).

<sup>13</sup>C NMR (100 MHz, Chloroform-*d*);  $\delta$  = 171.6, 155.3, 141.0, 140.2, 138.0, 135.9, 134.1, 132.6, 131.4, 130.1, 108.8, 63.2, 58.4, 54.3, 19.9, 0.0.

HRMS (ESI<sup>+</sup>) calcd for C<sub>23</sub>H<sub>23</sub>BrOSiNa [M+Na]<sup>+</sup>: 423.1598; found 423.1598.

**Methyl (Z)-3-(2-chloro-4-fluorophenyl)-2-((dimethyl(phenyl)silyl)methyl)acrylate 5r**

**5r**



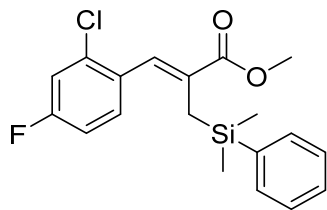

Colorless oil

$^1\text{H}$  NMR (400 MHz, Chloroform-*d*);  $\delta$  = 7.48 (s, 1H), 7.41 – 7.28 (m, 5H), 7.12 – 7.06 (m, 2H), 6.85 – 6.80 (m, 1H), 3.71 (s, 3H), 2.23 (s, 2H), 0.22 (s, 6H).

$^{13}\text{C}$  NMR (100 MHz, Chloroform-*d*);  $\delta$  = 168.6, 163.0, 160.5, 138.2, 134.8, 134.7, 133.5, 133.0, 131.8, 131.1, 131.0, 130.9, 130.8, 129.1, 127.8, 117.1, 116.9, 113.9, 113.7, 52.1, 17.5, – 2.8.

HRMS (ESI<sup>+</sup>) calcd for C<sub>23</sub>H<sub>23</sub>BrOSiNa [M+Na]<sup>+</sup>: 385.0789; found 385.0797.

**Methyl (Z)-3-(4-bromo-2-fluorophenyl)-2-((dimethyl(phenyl)silyl)methyl)acrylate**

**5s**

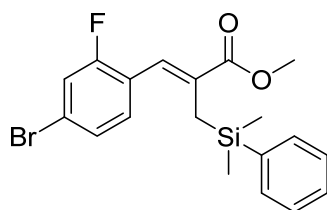

Colorless oil

$^1\text{H}$  NMR (400 MHz, Chloroform-*d*);  $\delta$  = 7.40 – 7.37 (m, 3H), 7.34 – 7.28 (m, 3H), 7.20 – 7.17 (m, 1H), 7.12 – 7.09 (m, 1H), 7.02 – 6.96 (m, 1H), 3.71 (s, 3H), 2.27 (s, 2H), 0.24 (s, 6H).

$^{13}\text{C}$  NMR (100 MHz, Chloroform-*d*);  $\delta$  = 168.5, 161.0, 158.5, 138.1, 133.9, 133.5, 130.73, 130.70, 129.1, 127.8, 127.1, 127.1, 123.4, 123.3, 121.9, 121.8, 119.4, 119.2, 52.1, 18.1, – 2.8.

HRMS (ESI<sup>+</sup>) calcd for C<sub>23</sub>H<sub>23</sub>BrOSiNa [M+Na]<sup>+</sup>: 429.0288; found 429.0292.

**Methyl (Z)-2-((dimethyl(phenyl)silyl)methyl)-3-(furan-2-yl)acrylate 5t**

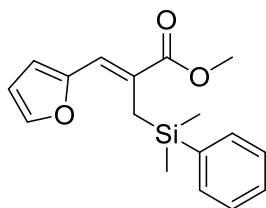

Brown oil

$^1\text{H}$  NMR (400 MHz, Chloroform-*d*);  $\delta$  = 7.54 – 7.52 (m, 2H), 7.42 – 7.41 (m, 1H), 7.34 – 7.33 (m, 3H), 7.28 (s, 1H), 6.47 – 6.42 (m, 2H), 3.64 (s, 3H), 2.60 (s, 2H), 0.25 (s, 6H).

$^{13}\text{C}$  NMR (100 MHz, Chloroform-*d*);  $\delta$  = 169.1, 152.3, 143.2, 139.0, 133.6, 128.9, 127.6, 127.2, 122.3, 114.2, 111.8, 51.9, 18.5, – 3.0.

HRMS (ESI<sup>+</sup>) calcd for C<sub>23</sub>H<sub>23</sub>BrOSiNa [M+Na]<sup>+</sup>: 323.1070; found 323.1074.

#### Methyl (Z)-3-(benzofuran-2-yl)-2-((dimethyl(phenyl)silyl)methyl)acrylate 5u

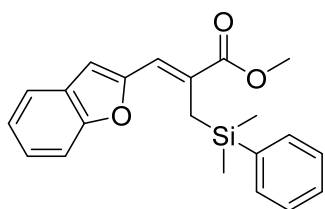

Colorless oil

$^1\text{H}$  NMR (400 MHz, Chloroform-*d*);  $\delta$  = 7.44 – 7.39 (m, 3H), 7.25 – 7.22 (m, 2H), 7.20 – 7.14 (m, 4H), 7.11 (m, 1H), 6.64 (s, 1H), 3.55 (s, 3H), 2.64 (s, 2H), 0.15 (s, 6H).

$^{13}\text{C}$  NMR (100 MHz, Chloroform-*d*);  $\delta$  = 168.8, 155.1, 154.0, 138.8, 133.6, 130.9, 129.0, 128.1, 127.7, 125.5, 123.2, 122.2, 121.3, 111.2, 110.5, 52.1, 19.3, -2.9.

#### Methyl (Z)-2-((dimethyl(phenyl)silyl)methyl)-5-phenylpent-2-enoate 5v

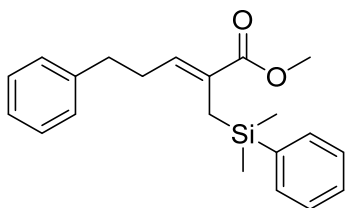

Colorless oil

$^1\text{H}$  NMR (400 MHz, Chloroform-*d*);  $\delta$  = 7.48 – 7.46 (m, 2H), 7.33 – 7.29 (m, 3H), 7.24

– 7.21 (m, 2H), 7.18 – 7.14 (m, 1H), 7.01 – 7.05 (m, 2H), 6.63 (t,  $J = 7.2$  Hz, 1H), 3.59 (s, 3H), 2.60 (t,  $J = 7.8$  Hz, 2H), 2.23 (dd,  $J = 15.6, 7.6$  Hz, 2H), 1.98 (s, 2H), 0.25 (s, 6H).

$^{13}\text{C}$  NMR (100 MHz, Chloroform-*d*);  $\delta = 168.6, 141.3, 138.7, 138.2, 133.6, 129.8, 129.1, 128.4, 128.3, 127.8, 127.7, 126.0, 51.6, 34.8, 30.8, 17.2, -2.8$ .

### Methyl (Z)-2-((dimethyl(phenyl)silyl)methyl)-4-methylpent-2-enoate 5w

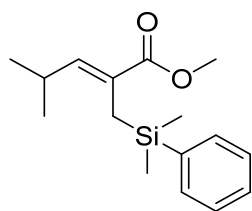

Colorless oil

$^1\text{H}$  NMR (400 MHz, Chloroform-*d*);  $\delta = 7.52 - 7.50$  (m, 2H), 7.35 – 7.34 (m, 3H), 6.41 (d,  $J = 10.2$  Hz, 1H), 3.61 (s, 3H), 2.41 – 2.30 (m, 1H), 2.01 (s, 2H), 0.88 (d,  $J = 6.6$  Hz, 6H), 0.28 (s, 6H).

$^{13}\text{C}$  NMR (100 MHz, Chloroform-*d*);  $\delta = 169.0, 146.1, 138.8, 133.6, 129.0, 127.7, 126.8, 51.5, 28.1, 21.9, 16.7, -2.9$ .

HRMS (ESI<sup>+</sup>) calcd for  $\text{C}_{23}\text{H}_{23}\text{BrOSiNa}$  [ $\text{M}+\text{Na}$ ]<sup>+</sup>: 299.1431; found 299.1438.

### Methyl (Z)-3-cyclopropyl-2-((dimethyl(phenyl)silyl)methyl)acrylate 5x

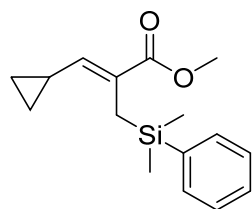

Colorless oil

$^1\text{H}$  NMR (400 MHz, Chloroform-*d*);  $\delta = 7.55 - 7.53$  (m, 2H), 7.36 – 7.34 (m, 3H), 6.04 (d,  $J = 10.6$  Hz, 1H), 3.60 (s, 3H), 2.14 (s, 2H), 1.40 – 1.31 (m, 1H), 0.81 – 0.79 (m, 2H), 0.53 – 0.49 (m, 2H), 0.32 (s, 6H).

$^{13}\text{C}$  NMR (100 MHz, Chloroform-*d*);  $\delta = 168.5, 144.5, 139.0, 133.7, 129.0, 127.7,$

126.7, 51.5, 16.7, 12.3, 8.5, – 2.9.

HRMS (ESI<sup>+</sup>) calcd for C<sub>23</sub>H<sub>23</sub>BrOSiNa [M+Na]<sup>+</sup>: 297.1279; found 297.1281.

**Methyl (Z)-3-cyclohexyl-2-((dimethyl(phenyl)silyl)methyl)acrylate 5y**

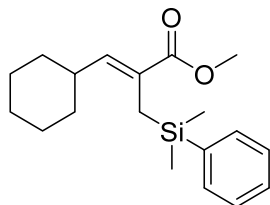

Colorless oil

<sup>1</sup>H NMR (400 MHz, Chloroform-*d*); δ = 7.53 – 7.50 (m, 2H), 7.36 – 7.33 (m, 3H), 6.42 (d, *J* = 10.1 Hz, 1H), 3.62 (s, 3H), 2.05 – 1.93 (m, 3H), 1.66 – 1.60 (m, 4H), 1.28 – 1.23 (m, 1H), 1.16 – 0.96 (m, 5H), 0.28 (s, 6H).

<sup>13</sup>C NMR (100 MHz, Chloroform-*d*); δ = 169.1, 144.6, 138.8, 133.6, 129.0, 127.7, 127.0, 51.5, 38.0, 31.9, 25.9, 25.6, 16.8, – 2.9.

HRMS (ESI<sup>+</sup>) calcd for C<sub>23</sub>H<sub>23</sub>BrOSiNa [M+Na]<sup>+</sup>: 339.1750; found 339.1751.

**Ethyl (Z)-2-((dimethyl(phenyl)silyl)methyl)-3-phenylacrylate 5z**

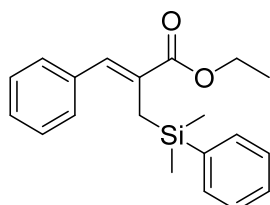

Colorless oil

<sup>1</sup>H NMR (400 MHz, Chloroform-*d*); δ = 7.41 (s, 1H), 7.33 – 7.31 (m, 2H), 7.21 – 7.18 (m, 3H), 7.15 – 7.10 (m, 5H), 4.05 (dd, *J* = 14.2, 7.1 Hz, 2H), 2.26 (s, 2H), 1.17 – 1.12 (m, 3H), 0.12 (s, 6H).

<sup>13</sup>C NMR (100 MHz, Chloroform-*d*); δ = 171.3, 141.2, 138.9, 137.9, 136.1, 133.7, 131.6, 131.5, 130.8, 130.2, 63.4, 27.5, 19.8, 16.7, 0.0.

HRMS (ESI<sup>+</sup>) calcd for C<sub>23</sub>H<sub>23</sub>BrOSiNa [M+Na]<sup>+</sup>: 347.1440; found 347.1438.

**2-Ethylhexyl (Z)-2-((dimethyl(phenyl)silyl)methyl)-3-phenylacrylate 5A**

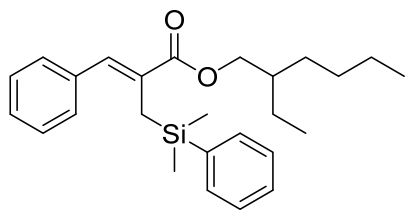

Colorless oil

$^1\text{H}$  NMR (400 MHz, Chloroform-*d*);  $\delta$  = 7.43 (s, 1H), 7.37 – 7.35 (m, 2H), 7.24 – 7.13 (m, 8H), 3.95 – 3.93 (m, 2H), 2.31 (s, 2H), 1.54 – 1.51 (m, 1H), 1.32 – 1.20 (m, 8H), 0.84 – 0.80 (m, 6H), 0.15 (s, 6H).

$^{13}\text{C}$  NMR (100 MHz, Chloroform-*d*);  $\delta$  = 169.0, 138.7, 136.4, 135.2, 133.6, 131.4, 129.11, 129.06, 128.3, 127.8, 67.4, 38.8, 30.6, 29.0, 23.9, 23.1, 17.4, 14.2, 11.1, – 2.5.

HRMS (ESI<sup>+</sup>) calcd for C<sub>23</sub>H<sub>23</sub>BrOSiNa [M+Na]<sup>+</sup>: 431.2382; found 431.2377.

### **2,2,2-Trifluoroethyl (Z)-2-((dimethyl(phenyl)silyl)methyl)-3-phenylacrylate 5B**

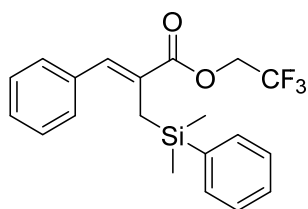

Colorless oil

$^1\text{H}$  NMR (400 MHz, Chloroform-*d*);  $\delta$  = 7.61 (s, 1H), 7.47 – 7.44 (m, 2H), 7.38 – 7.29 (m, 8H), 4.47 (dd, *J* = 17.2, 8.5 Hz, 2H), 2.43 (s, 2H), 0.26 (s, 6H).

$^{13}\text{C}$  NMR (100 MHz, Chloroform-*d*);  $\delta$  = 167.1, 138.2, 137.6, 135.7, 133.6, 129.4, 129.22, 129.19, 128.4, 128.3, 127.8, 124.5, 121.8, 61.3, 60.9, 60.6, 60.2, 17.5, – 2.7.

HRMS (ESI<sup>+</sup>) calcd for C<sub>23</sub>H<sub>23</sub>BrOSiNa [M+Na]<sup>+</sup>: 401.1150; found 401.1155.

### **Benzyl (Z)-2-((dimethyl(phenyl)silyl)methyl)-3-phenylacrylate 5C**

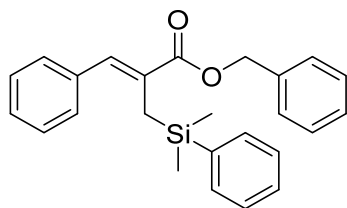

Colorless oil

$^1\text{H}$  NMR (400 MHz, Chloroform-*d*);  $\delta$  = 7.56 (s, 1H), 7.41 – 7.32 (m, 7H), 7.31 – 7.26 (m, 3H), 7.24 – 7.20 (m, 5H), 5.11 (s, 2H), 2.39 (s, 2H), 0.18 (s, 6H).

$^{13}\text{C}$  NMR (100 MHz, Chloroform-*d*);  $\delta$  = 168.7, 138.6, 136.3, 136.1, 135.9, 133.6, 131.0, 129.14, 129.08, 128.6, 128.36, 128.35, 128.2, 127.9, 127.8, 66.7, 17.4, – 2.5.

HRMS (ESI<sup>+</sup>) calcd for C<sub>23</sub>H<sub>23</sub>BrOSiNa [M+Na]<sup>+</sup>: 409.1593; found 409.1594.

### **(Z)-2-((dimethyl(phenyl)silyl)methyl)-3-(*p*-tolyl)acrylonitrile 5D**

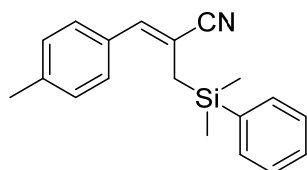

Colorless oil

$^1\text{H}$  NMR (400 MHz, Chloroform-*d*);  $\delta$  = 7.54 – 7.48 (m, 4H), 7.41 – 7.38 (m, 3H), 7.19 – 7.04 (m, 2H), 6.54 (s, 1H), 2.36 (s, 3H), 2.06 (s, 2H), 0.46 (s, 6H).

$^{13}\text{C}$  NMR (100 MHz, Chloroform-*d*);  $\delta$  = 141.8, 139.6, 136.9, 133.7, 131.5, 129.6, 129.4, 128.1, 128.0, 119.9, 107.0, 26.2, 21.4, – 3.4

HRMS (ESI<sup>+</sup>) calcd for C<sub>19</sub>H<sub>22</sub>NSi [M+H]<sup>+</sup>: 292.1522; found 292.1523.

### **(Z)-2-((dimethyl(phenyl)silyl)methyl)-3-phenylacrylamide 5E**

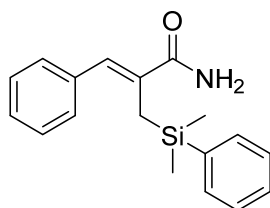

Colorless oil

$^1\text{H}$  NMR (400 MHz, Chloroform-*d*);  $\delta$  = 7.41 – 7.38 (m, 2H), 7.29 – 7.11 (m, 8H), 7.00 (s, 1H), 5.56 (s, 2H), 2.23 (s, 2H), 0.23 (s, 6H).

$^{13}\text{C}$  NMR (100 MHz, Chloroform-*d*);  $\delta$  = 175.1, 140.8, 138.6, 137.7, 136.1, 133.1, 131.8, 131.3, 130.9, 130.4, 130.1, 20.5, 0.0.

HRMS (ESI<sup>+</sup>) calcd for C<sub>18</sub>H<sub>21</sub>NOSiNa [M+Na]<sup>+</sup>: 318.1290; found 318.1291.

**2,6-Di-*tert*-butyl-4-((dimethyl(phenyl)silyl)(phenyl)methyl)phenol 7a**

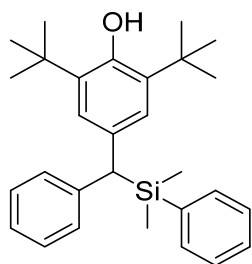

Yellow oil

$^1\text{H}$  NMR (400 MHz, Chloroform-*d*);  $\delta$  = 7.35 – 7.28 (m, 2H), 7.25 – 7.19 (m, 5H), 7.16 – 7.08 (m, 3H), 6.86 (s, 2H), 4.93 (s, 1H), 3.62 (s, 1H), 1.33 (s, 18H), 0.27 (s, 3H), 0.25 (s, 3H).

$^{13}\text{C}$  NMR (100 MHz, Chloroform-*d*);  $\delta$  = 151.3, 143.1, 137.9, 135.2, 134.5, 132.3, 129.0, 128.9, 128.2, 127.5, 125.4, 125.0, 45.5, 34.3, 30.4, – 3.0, – 3.4.

**2,6-Di-*tert*-butyl-4-((dimethyl(phenyl)silyl)(*o*-tolyl)methyl)phenol 7b**

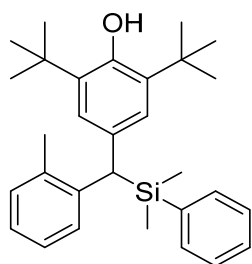

Yellow oil

$^1\text{H}$  NMR (400 MHz, Chloroform-*d*);  $\delta$  = 7.38 – 7.31 (m, 1H), 7.30 – 7.28 (m, 5H), 7.15 – 7.03 (m, 3H), 6.82 (s, 2H), 4.93 (s, 1H), 3.84 (s, 1H), 2.27 (s, 3H), 1.33 (s, 18H), 0.33 (s, 3H), 0.29 (s, 3H).

$^{13}\text{C}$  NMR (100 MHz, Chloroform-*d*);  $\delta$  = 151.1, 141.5, 138.4, 136.6, 135.1, 134.5, 131.9, 130.5, 129.4, 128.9, 127.5, 125.5, 125.4, 125.2, 40.1, 34.3, 30.3, 20.6, – 2.5, – 3.5.

**2,6-Di-*tert*-butyl-4-((dimethyl(phenyl)silyl)(2-methoxyphenyl)methyl)phenol 7c**

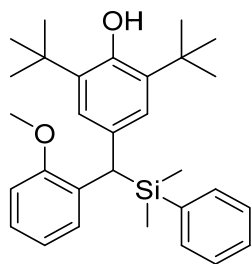

Pale yellow oil

$^1\text{H}$  NMR (400 MHz, Chloroform-*d*);  $\delta$  = 7.36 – 7.32 (m, 1H), 7.31 – 7.28 (m, 4H), 7.24 – 7.21 (m, 1H), 7.15 – 7.11 (m, 1H), 6.92 (s, 2H), 6.89 – 6.81 (m, 2H), 4.93 (s, 1H), 4.20 (s, 1H), 3.72 (s, 3H), 1.36 (s, 18H), 0.28 (s, 3H), 0.25 (s, 3H).

$^{13}\text{C}$  NMR (100 MHz, Chloroform-*d*);  $\delta$  = 156.7, 151.1, 139.1, 135.0, 134.4, 132.5, 131.7, 130.2, 128.7, 127.3, 126.0, 125.7, 120.2, 110.4, 55.1, 36.6, 34.3, 30.4, – 2.8, – 3.4.

**2,6-Di-*tert*-butyl-4-((dimethyl(phenyl)silyl)(2-hydroxyphenyl)methyl)phenol 7d**

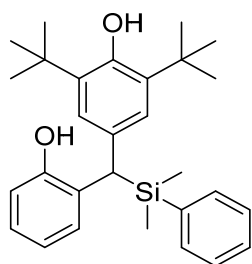

Pale yellow oil

$^1\text{H}$  NMR (400 MHz, Chloroform-*d*);  $\delta$  = 7.39 – 7.35 (m, 1H), 7.34 – 7.28 (m, 5H), 7.10 – 7.06 (m, 1H), 6.90 – 6.86 (m, 1H), 6.84 (s, 2H), 6.80 – 6.77 (m, 1H), 5.00 (s, 1H), 4.81 (s, 1H), 3.95 (s, 1H), 1.33 (s, 18H), 0.38 (s, 3H), 0.35 (s, 3H).

$^{13}\text{C}$  NMR (100 MHz, Chloroform-*d*);  $\delta$  = 153.8, 151.6, 138.2, 135.5, 134.4, 131.1, 130.6, 129.2, 129.0, 127.6, 126.7, 125.5, 120.5, 116.1, 37.0, 34.3, 30.3, – 2.6, – 3.5.

HRMS (ESI<sup>+</sup>) calcd for C<sub>29</sub>H<sub>39</sub>O<sub>2</sub>Si [M+H]<sup>+</sup>: 447.1719; found 447.2716.

**4-((2-Bromophenyl)(dimethyl(phenyl)silyl)methyl)-2,6-di-*tert*-butylphenol 7e**



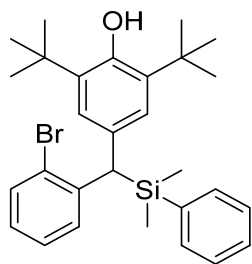

Pale yellow oil

$^1\text{H}$  NMR (400 MHz, Chloroform-*d*);  $\delta$  = 7.55 – 7.53 (m, 1H), 7.37 – 7.27 (m, 6H), 7.20 – 7.16 (m, 1H), 6.99 – 6.95 (m, 1H), 6.87 (s, 2H), 4.95 (s, 1H), 4.35 (s, 1H), 1.32 (s, 18H), 0.32 (s, 3H), 0.26 (s, 3H).

$^{13}\text{C}$  NMR (100 MHz, Chloroform-*d*);  $\delta$  = 151.4, 142.6, 137.7, 135.2, 134.6, 133.0, 131.3, 130.4, 129.1, 127.6, 127.0, 126.6, 126.1, 125.6, 43.0, 34.3, 30.3, – 2.7, – 3.8.

**2,6-Di-*tert*-butyl-4-((dimethyl(phenyl)silyl)(*m*-tolyl)methyl)phenol 7f**

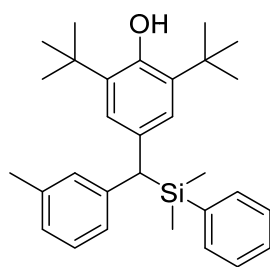

Colorless oil

$^1\text{H}$  NMR (400 MHz, Chloroform-*d*);  $\delta$  = 7.33 – 7.29 (m, 1H), 7.25 – 7.20 (m, 4H), 7.10 – 7.08 (m, 1H), 6.95 – 6.89 (m, 3H), 6.82 (s, 2H), 4.89 (s, 1H), 3.53 (s, 1H), 2.23 (s, 3H), 1.30 (s, 18H), 0.24 (s, 3H), 0.21 (s, 3H).

$^{13}\text{C}$  NMR (100 MHz, Chloroform-*d*);  $\delta$  = 151.3, 142.8, 138.0, 137.5, 135.2, 134.5, 132.3, 130.0, 128.9, 127.9, 127.4, 125.8, 125.7, 125.3, 45.4, 34.3, 30.3, 21.6, – 3.1, – 3.5.

**2,6-Di-*tert*-butyl-4-((dimethyl(phenyl)silyl)(3-methoxyphenyl)methyl)phenol 7g**

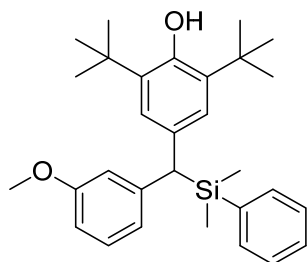

Colorless oil

$^1\text{H}$  NMR (400 MHz, Chloroform-*d*);  $\delta$  = 7.39 – 7.34 (m, 1H), 7.33 – 7.28 (m, 4H), 7.18 – 7.14 (m, 1H), 6.91 (s, 2H), 6.80 – 6.78 (m, 1H), 6.72 – 6.69 (m, 2H), 4.98 (s, 1H), 3.70 (s, 3H), 3.64 (s, 1H), 1.38 (s, 18H), 0.31 (s, 3H), 0.30 (s, 3H).

$^{13}\text{C}$  NMR (100 MHz, Chloroform-*d*);  $\delta$  = 159.3, 151.4, 144.6, 137.9, 135.3, 134.6, 132.1, 129.02, 129.00, 127.5, 125.4, 121.4, 114.1, 111.0, 55.0, 45.7, 34.4, 30.4, – 3.1, – 3.3.

### 2,6-Di-*tert*-butyl-4-((dimethyl(phenyl)silyl)(3-fluorophenyl)methyl)phenol 7h

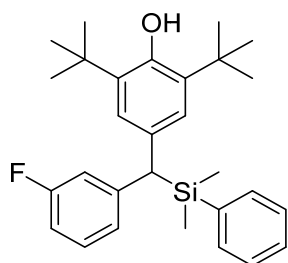

Colorless oil

$^1\text{H}$  NMR (400 MHz, Chloroform-*d*);  $\delta$  = 7.33 – 7.29 (m, 1H), 7.25 – 7.19 (m, 4H), 7.15 – 7.10 (m, 1H), 6.88 – 6.85 (m, 1H), 6.81 – 6.74 (m, 4H), 4.94 (s, 1H), 3.58 (s, 1H), 1.30 (s, 18H), 0.24 (s, 3H), 0.22 (s, 3H).

$^{13}\text{C}$  NMR (100 MHz, Chloroform-*d*);  $\delta$  = 161.5, 151.5, 145.9, 145.8, 137.4, 135.4, 134.4, 131.6, 129.4, 129.3, 129.1, 127.6, 125.5, 124.5, 124.4, 115.6, 115.4, 111.9, 111.7, 45.5, 45.4, 34.3, 30.3, – 3.2, – 3.4.

HRMS (ESI<sup>+</sup>) calcd for C<sub>29</sub>H<sub>38</sub>FOSi [M+H]<sup>+</sup>: 449.2676; found 449.2672.

### 4-((3-Bromophenyl)(dimethyl(phenyl)silyl)methyl)-2,6-di-*tert*-butylphenol 3i

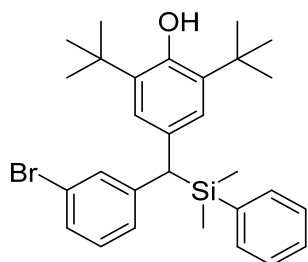

Yellow oil

$^1\text{H}$  NMR (400 MHz, Chloroform-*d*);  $\delta$  = 7.33 – 7.29 (m, 1H), 7.25 – 7.24 (m, 1H), 7.22 – 7.17 (m, 5H), 7.05 – 6.99 (m, 2H), 6.78 (s, 2H), 4.88 (s, 1H), 3.56 (s, 1H), 1.23 (s, 18H), 0.16 (s, 3H), 0.15 (s, 3H).

$^{13}\text{C}$  NMR (100 MHz, Chloroform-*d*);  $\delta$  = 151.5, 145.5, 137.2, 135.4, 134.5, 131.9, 131.5, 129.6, 129.2, 128.0, 127.6, 127.2, 125.4, 122.2, 45.3, 34.3, 30.3, – 3.2, – 3.5.

HRMS (ESI<sup>+</sup>) calcd for C<sub>29</sub>H<sub>38</sub>BrOSi [M+H]<sup>+</sup>: 509.1875; found 509.1871.

**2,6-Di-*tert*-butyl-4-((dimethyl(phenyl)silyl)(3-(trifluoromethyl)phenyl)methyl)phenol 3j**

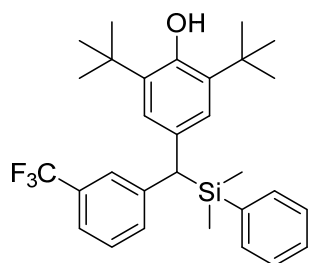

Pale yellow oil

$^1\text{H}$  NMR (400 MHz, Chloroform-*d*);  $\delta$  = 7.27 – 7.22 (m, 3H), 7.20 – 7.15 (m, 4H), 7.12 – 7.09 (m, 2H), 6.74 (s, 2H), 4.93 (s, 1H), 3.52 (s, 1H), 1.29 (s, 18H), 0.23 (s, 3H), 0.21 (s, 3H).

$^{13}\text{C}$  NMR (100 MHz, Chloroform-*d*);  $\delta$  = 151.6, 144.0, 137.0, 135.5, 134.5, 132.0, 131.3, 129.3, 128.5, 127.6, 125.5, 125.4, 125.3, 121.79, 121.75, 45.6, 34.4, 30.3, – 3.4, – 3.5.

**2,6-Di-*tert*-butyl-4-((dimethyl(phenyl)silyl)(*p*-tolyl)methyl)phenol 7k**

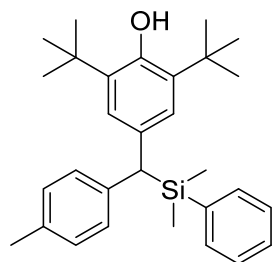

Pale yellow oil

$^1\text{H}$  NMR (400 MHz, Chloroform-*d*);  $\delta$  = 7.33 – 7.28 (m, 1H), 7.25 – 7.21 (m, 4H), 7.03

– 6.99 (m, 4H), 6.81 (s, 2H), 4.89 (s, 1H), 3.54 (s, 1H), 2.26 (s, 3H), 1.30 (s, 18H), 0.23 (s, 3H), 0.21 (s, 3H).

$^{13}\text{C}$  NMR (100 MHz, Chloroform-*d*);  $\delta$  = 151.2, 139.9, 138.1, 135.1, 134.5, 134.3, 132.5, 128.9, 128.84, 128.79, 127.4, 125.3, 45.0, 34.3, 30.3, 21.0, – 3.0, – 3.4.

### 2,6-Di-*tert*-butyl-4-((dimethyl(phenyl)silyl)(4-methoxyphenyl)methyl)phenol 7l

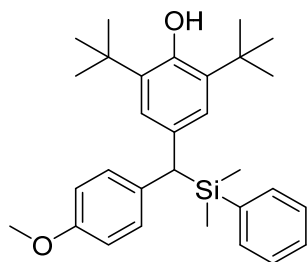

Yellow oil

$^1\text{H}$  NMR (400 MHz, Chloroform-*d*);  $\delta$  = 7.35 – 7.31 (m, 1H), 7.28 – 7.23 (m, 4H), 7.08 – 7.05 (m, 2H), 6.83 (s, 2H), 6.79 – 6.76 (m, 2H), 4.92 (s, 1H), 3.77 (s, 3H), 3.56 (s, 1H), 1.33 (s, 18H), 0.26 (s, 3H), 0.24 (s, 3H).

$^{13}\text{C}$  NMR (100 MHz, Chloroform-*d*);  $\delta$  = 157.1, 151.2, 138.1, 135.2, 135.2, 134.5, 132.7, 129.9, 128.9, 127.5, 125.2, 113.6, 55.2, 44.3, 34.3, 30.3, – 3.0, – 3.4.

### 2,6-Di-*tert*-butyl-4-((4-(*tert*-butyl)phenyl)(dimethyl(phenyl)silyl)methyl)phenol 7m

7m

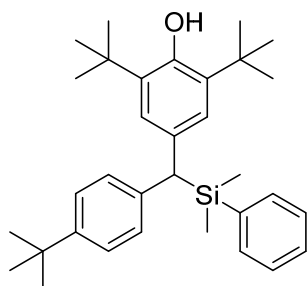

Pale yellow oil

$^1\text{H}$  NMR (400 MHz, Chloroform-*d*);  $\delta$  = 7.35 – 7.29 (m, 1H), 7.25 – 7.20 (m, 6H), 7.08 – 7.06 (m, 2H), 6.84 (s, 2H), 4.90 (s, 1H), 3.55 (s, 1H), 1.32 (s, 18H), 1.27 (s, 9H), 0.26 (s, 3H), 0.23 (s, 3H).

$^{13}\text{C}$  NMR (100 MHz, Chloroform-*d*);  $\delta$  = 151.3, 147.6, 139.8, 138.1, 135.1, 134.5,

132.5, 128.9, 128.4, 127.4, 125.4, 125.0, 45.2, 34.30, 34.28, 31.5, 30.4, – 3.1, – 3.3.

HRMS (ESI<sup>+</sup>) calcd for C<sub>33</sub>H<sub>47</sub>OSi [M+H]<sup>+</sup>: 487.3396; found 487.3396.

**2,6-Di-*tert*-butyl-4-((dimethyl(phenyl)silyl)(4-(methylthio)phenyl)methyl)phenol**

**7n**

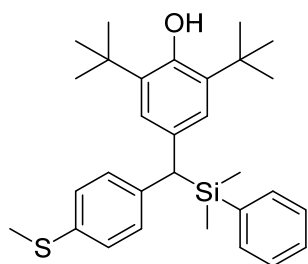

Pale yellow oil

<sup>1</sup>H NMR (400 MHz, Chloroform-*d*);  $\delta$  = 7.38 – 7.29 (m, 5H), 7.19 – 7.10 (m, 4H), 6.88 (s, 2H), 4.99 (s, 1H), 3.62 (s, 1H), 2.49 (s, 3H), 1.38 (s, 18H), 0.31 (s, 6H).

<sup>13</sup>C NMR (100 MHz, Chloroform-*d*);  $\delta$  = 151.4, 140.3, 137.8, 135.3, 134.5, 134.1, 132.1, 129.4, 129.0, 127.5, 126.9, 125.4, 45.0, 34.3, 30.3, 16.3, – 3.1, – 3.4.

HRMS (ESI<sup>+</sup>) calcd for C<sub>30</sub>H<sub>41</sub>OSSi [M+H]<sup>+</sup>: 477.2647; found 477.2652.

**2,6-Di-*tert*-butyl-4-((dimethyl(phenyl)silyl)(4-(dimethylamino)phenyl)methyl)phenol 7o**

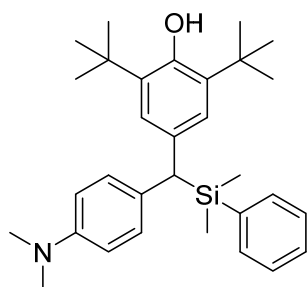

Orange oil

<sup>1</sup>H NMR (400 MHz, Chloroform-*d*);  $\delta$  = 7.34 – 7.31 (m, 1H), 7.26 – 7.25 (m, 4H), 7.05 – 7.01 (m, 2H), 6.82 (s, 2H), 6.67 – 6.63 (m, 2H), 4.89 (s, 1H), 3.50 (s, 1H), 2.89 (s, 6H), 1.31 (s, 18H), 0.25 (s, 3H), 0.23 (s, 3H).

<sup>13</sup>C NMR (100 MHz, Chloroform-*d*);  $\delta$  = 151.1, 148.4, 138.4, 135.0, 134.6, 133.0, 131.4, 129.6, 128.8, 127.4, 125.2, 113.0, 44.1, 41.0, 34.3, 30.3, – 2.9, – 3.4.

HRMS (ESI<sup>+</sup>) calcd for C<sub>31</sub>H<sub>44</sub>NOSi [M+H]<sup>+</sup>: 474.3192; found 474.3189.

**2,6-Di-*tert*-butyl-4-((dimethyl(phenyl)silyl)(4-(diphenylamino)phenyl)methyl)phenol 7p**

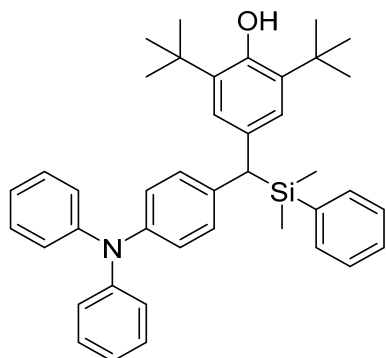

Orange oil

<sup>1</sup>H NMR (400 MHz, Chloroform-*d*);  $\delta$  = 7.35 – 7.29 (m, 2H), 7.25 – 7.19 (m, 7H), 7.06 – 7.02 (m, 6H), 6.99 – 6.94 (m, 4H), 6.86 (s, 2H), 4.95 (s, 1H), 3.57 (s, 1H), 1.34 (s, 18H), 0.29 (s, 3H), 0.26 (s, 3H).

<sup>13</sup>C NMR (100 MHz, Chloroform-*d*);  $\delta$  = 151.3, 148.0, 137.9, 137.8, 135.2, 134.5, 132.4, 129.6, 129.1, 128.9, 127.4, 125.3, 124.7, 123.6, 122.1, 44.9, 34.3, 30.3, – 3.2, – 3.4.

HRMS (ESI<sup>+</sup>) calcd for C<sub>41</sub>H<sub>48</sub>NOSi [M+H]<sup>+</sup>: 598.3505; found 598.3508.

**4-([1,1'-Biphenyl]-4-yl(dimethyl(phenyl)silyl)methyl)-2,6-di-*tert*-butylphenol 7q**

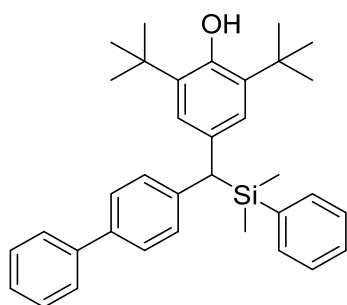

Yellow oil

<sup>1</sup>H NMR (400 MHz, Chloroform-*d*);  $\delta$  = 7.54 – 7.51 (m, 2H), 7.42 – 7.33 (m, 4H), 7.31 – 7.27 (m, 1H), 7.25 – 7.13 (m, 7H), 6.83 (s, 2H), 4.89 (s, 1H), 3.60 (s, 1H), 1.28 (s, 18H), 0.24 (s, 3H), 0.22 (s, 3H).

$^{13}\text{C}$  NMR (100 MHz, Chloroform-*d*);  $\delta$  = 151.4, 142.3, 141.1, 137.8, 137.6, 135.3, 134.6, 132.2, 129.2, 129.0, 128.7, 127.5, 126.9, 126.9, 126.8, 125.5, 45.3, 34.3, 30.4, – 3.1, – 3.3.

HRMS (ESI<sup>+</sup>) calcd for C<sub>35</sub>H<sub>42</sub>OSiNa [M+Na]<sup>+</sup>: 529.2903; found 529.2904.

**2,6-Di-*tert*-butyl-4-((dimethyl(phenyl)silyl)(4-fluorophenyl)methyl)phenol 7r**

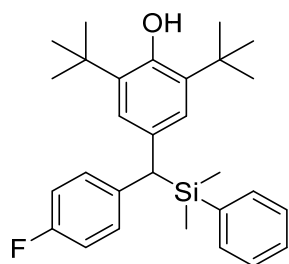

Pale yellow oil

$^1\text{H}$  NMR (400 MHz, Chloroform-*d*);  $\delta$  = 7.30 – 7.26 (m, 1H), 7.23 – 7.16 (m, 4H), 7.04 – 7.00 (m, 2H), 6.86 – 6.82 (m, 2H), 6.77 (s, 2H), 4.90 (s, 1H), 3.54 (s, 1H), 1.28 (s, 18H), 0.20 (s, 3H), 0.19 (s, 3H).

$^{13}\text{C}$  NMR (100 MHz, Chloroform-*d*);  $\delta$  = 159.6, 151.4, 138.8, 138.7, 137.6, 135.4, 134.5, 132.2, 130.2, 130.1, 129.1, 127.6, 125.3, 115.0, 114.8, 44.5, 34.4, 30.3, – 3.1, – 3.4.

HRMS (ESI<sup>+</sup>) calcd for C<sub>29</sub>H<sub>38</sub>FOSi [M+H]<sup>+</sup>: 449.2676; found 449.2674.

**2,6-Di-*tert*-butyl-4-((4-chlorophenyl)(dimethyl(phenyl)silyl)methyl)phenol 7s**

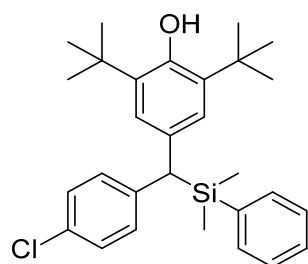

Pale yellow oil

$^1\text{H}$  NMR (400 MHz, Chloroform-*d*);  $\delta$  = 7.26 – 7.22 (m, 1H), 7.19 – 7.11 (m, 4H), 7.08 – 7.05 (m, 2H), 6.94 – 6.92 (m, 2H), 6.72 (s, 2H), 4.56 (s, 1H), 3.48 (s, 1H), 1.23 (s, 18H), 0.15 (s, 3H), 0.14 (s, 3H).

$^{13}\text{C}$  NMR (100 MHz, Chloroform-*d*);  $\delta$  = 151.5, 141.7, 137.4, 135.4, 134.5, 131.8, 130.6, 130.1, 129.1, 128.2, 127.6, 125.4, 44.9, 34.3, 30.3, - 3.2, - 3.4.

HRMS (ESI<sup>+</sup>) calcd for C<sub>29</sub>H<sub>38</sub>ClOSi [M+H]<sup>+</sup>: 465.2380; found 465.2379.

#### 4-((4-Bromophenyl)(dimethyl(phenyl)silyl)methyl)-2,6-di-*tert*-butylphenol 7t

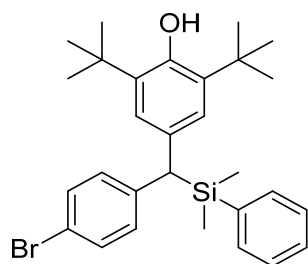

Pale yellow oil

$^1\text{H}$  NMR (400 MHz, Chloroform-*d*);  $\delta$  = 7.36 – 7.32 (m, 2H), 7.31 – 7.21 (m, 5H), 6.99 – 6.97 (m, 2H), 6.82 (s, 2H), 4.96 (s, 1H), 3.87 (s, 1H), 1.32 (s, 18H), 0.25 (s, 3H), 0.24 (s, 3H).

$^{13}\text{C}$  NMR (100 MHz, Chloroform-*d*);  $\delta$  = 151.5, 142.2, 137.4, 135.4, 134.5, 131.7, 131.1, 130.5, 129.1, 127.6, 125.4, 118.6, 44.9, 34.3, 30.3, - 3.2, - 3.4.

#### 4-((3,5-Di-*tert*-butyl-4-hydroxyphenyl)(dimethyl(phenyl)silyl)methyl)benzonitrile 7u

7u

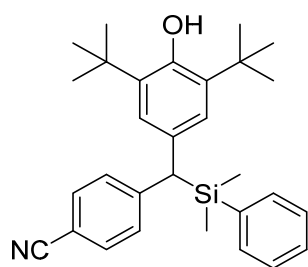

Yellow oil

$^1\text{H}$  NMR (400 MHz, Chloroform-*d*);  $\delta$  = 7.78 – 7.76 (m, 2H), 7.68 – 7.64 (m, 1H), 7.58 – 7.55 (m, 2H), 7.52 – 7.50 (m, 2H), 7.47 – 7.45 (m, 2H), 7.15 (s, 2H), 5.33 (s, 1H), 4.00 (s, 1H), 1.64 (s, 18H), 0.57 (s, 6H).

$^{13}\text{C}$  NMR (100 MHz, Chloroform-*d*);  $\delta$  = 151.8, 149.3, 136.7, 135.7, 134.4, 131.9, 130.8, 129.4, 129.1, 127.7, 125.7, 119.4, 108.4, 46.4, 34.4, 30.3, - 3.2, - 3.5.



**2,6-Di-*tert*-butyl-4-((dimethyl(phenyl)silyl)(4-nitrophenyl)methyl)phenol 7v**

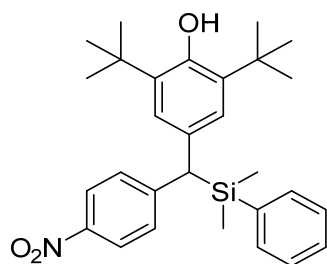

Pale yellow oil

$^1\text{H}$  NMR (400 MHz, Chloroform-*d*);  $\delta$  = 8.07 – 8.04 (m, 2H), 7.39 – 7.35 (m, 1H), 7.31 – 7.27 (m, 2H), 7.23 – 7.18 (m, 4H), 6.89 (s, 2H), 5.04 (s, 1H), 3.77 (s, 1H), 1.35 (s, 18H), 0.29 (s, 6H).

$^{13}\text{C}$  NMR (100 MHz, Chloroform-*d*);  $\delta$  = 151.9, 151.7, 145.4, 136.6, 135.8, 134.4, 129.5, 128.9, 127.7, 125.7, 123.4, 46.3, 34.4, 30.3, – 3.2, – 3.5.

HRMS (ESI<sup>+</sup>) calcd for C<sub>29</sub>H<sub>38</sub>NO<sub>3</sub>Si [M+H]<sup>+</sup>: 476.2621; found 476.2622.

**2,6-Di-*tert*-butyl-4-((3,4-dimethoxyphenyl)(dimethyl(phenyl)silyl)methyl)phenol 7w**

**7w**

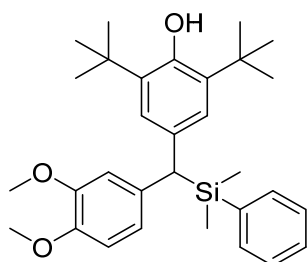

Pale yellow oil

$^1\text{H}$  NMR (400 MHz, Chloroform-*d*);  $\delta$  = 7.32 – 7.29 (m, 1H), 7.25 – 7.24 (m, 1H), 7.22 – 7.20 (m, 3H), 6.83 (s, 2H), 6.72 – 6.65 (m, 2H), 6.56 – 6.55 (m, 1H), 4.91 (s, 1H), 3.80 (s, 3H), 3.62 (s, 3H), 3.50 (s, 1H), 1.30 (s, 18H), 0.21 (s, 6H).

$^{13}\text{C}$  NMR (100 MHz, Chloroform-*d*);  $\delta$  = 151.3, 148.2, 146.4, 137.9, 135.5, 135.2, 134.7, 132.4, 129.0, 127.5, 125.1, 120.7, 112.2, 110.9, 55.8, 55.4, 44.9, 34.3, 30.3, – 3.1, – 3.5.

HRMS (ESI<sup>+</sup>) calcd for C<sub>31</sub>H<sub>43</sub>O<sub>3</sub>Si [M+H]<sup>+</sup>: 491.2981; found 491.2976.

**2,6-Di-*tert*-butyl-4-((dimethyl(phenyl)silyl)(3,4,5-trimethoxyphenyl)methyl)phenol 7x**

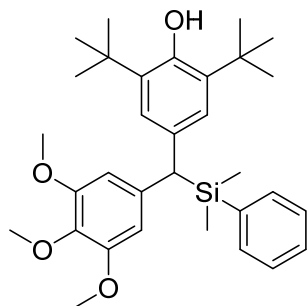

Yellow oil

<sup>1</sup>H NMR (400 MHz, Chloroform-*d*);  $\delta$  = 7.29 – 7.21 (m, 2H), 7.19 – 7.16 (m, 3H), 6.82 (s, 2H), 6.25 (m, 2H), 4.89 (s, 1H), 3.71 (s, 3H), 3.60 (s, 6H), 3.44 (s, 1H), 1.28 (s, 18H), 0.19 (s, 3H), 0.18 (s, 3H).

<sup>13</sup>C NMR (100 MHz, Chloroform-*d*);  $\delta$  = 152.6, 151.4, 138.6, 137.7, 135.3, 134.8, 132.0, 129.1, 127.5, 125.1, 105.7, 60.9, 55.7, 46.0, 34.4, 30.3, – 3.2, – 3.4.

HRMS (ESI<sup>+</sup>) calcd for C<sub>32</sub>H<sub>45</sub>O<sub>4</sub>Si [M+H]<sup>+</sup>: 521.3087; found 521.3087.

**2,6-Di-*tert*-butyl-4-((2-chloro-4-fluorophenyl)(dimethyl(phenyl)silyl)methyl)phenol 7y**

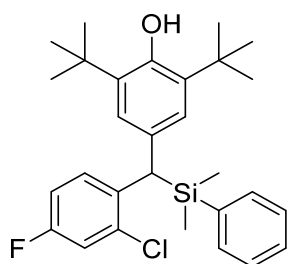

Colorless oil

<sup>1</sup>H NMR (400 MHz, Chloroform-*d*);  $\delta$  = 7.43 – 7.40 (m, 1H), 7.38 – 7.35 (m, 4H), 7.30 – 7.26 (m, 1H), 7.18 – 7.15 (m, 1H), 6.96 – 6.91 (m, 1H), 6.89 (s, 2H), 5.04 (s, 1H), 4.33 (s, 1H), 1.39 (s, 18H), 0.37 (s, 3H), 0.33 (s, 3H).

<sup>13</sup>C NMR (100 MHz, Chloroform-*d*);  $\delta$  = 161.3, 158.9, 151.5, 137.4, 136.9, 136.9, 135.3, 134.8, 134.5, 131.2, 131.1, 131.0, 129.2, 127.6, 125.5, 116.9, 116.7, 113.7, 113.5,

39.3, 34.3, 30.3, - 2.8, - 3.7.

HRMS (ESI<sup>+</sup>) calcd for C<sub>29</sub>H<sub>37</sub>FCIOSi [M+H]<sup>+</sup>: 483.2286; found 483.2289.

**4-((4-Bromo-2-fluorophenyl)(dimethyl(phenyl)silyl)methyl)-2,6-di-*tert*-butylphenol 7z**

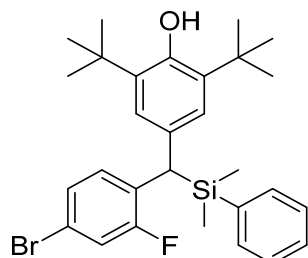

Yellow oil

<sup>1</sup>H NMR (400 MHz, Chloroform-*d*);  $\delta$  = 7.37 – 7.32 (m, 1H), 7.29 – 7.28 (m, 4H), 7.15 – 7.11 (m, 3H), 6.92 (s, 2H), 4.94 (s, 1H), 4.39 (s, 1H), 1.35 (s, 18H), 0.21 (s, 6H).

<sup>13</sup>C NMR (100 MHz, Chloroform-*d*);  $\delta$  = 154.4, 151.2, 138.1, 138.0, 135.2, 134.4, 132.0, 131.2, 128.9, 127.4, 126.1, 125.1, 123.8, 118.8, 36.7, 34.3, 30.3, 26.8, 24.3, - 3.0, - 4.0.

HRMS (ESI<sup>+</sup>) calcd for C<sub>29</sub>H<sub>37</sub>FBrOSi [M+H]<sup>+</sup>: 527.1781; found 527.1777.

**2,6-Di-*tert*-butyl-4-((dimethyl(phenyl)silyl)(naphthalen-2-yl)methyl)phenol 7A**

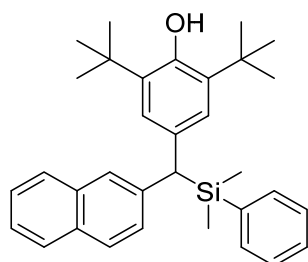

Yellow oil

<sup>1</sup>H NMR (400 MHz, Chloroform-*d*);  $\delta$  = 7.80 – 7.78 (m, 1H), 7.73 – 7.69 (m, 2H), 7.60 (s, 1H), 7.45 – 7.36 (m, 3H), 7.35 – 7.29 (m, 5H), 6.95 (s, 2H), 4.97 (s, 1H), 3.82 (s, 1H), 1.36 (s, 18H), 0.32 (s, 3H), 0.30 (s, 3H).

<sup>13</sup>C NMR (100 MHz, Chloroform-*d*);  $\delta$  = 151.4, 140.7, 137.9, 135.3, 134.6, 133.6, 132.2, 131.5, 129.1, 128.3, 127.54, 127.52, 127.48, 126.8, 125.7, 125.5, 124.8, 45.6, 34.3, 30.3, - 3.0, - 3.3.

**2,6-Di-*tert*-butyl-4-((dimethyl(phenyl)silyl)(thiophen-2-yl)methyl)phenol 7B**

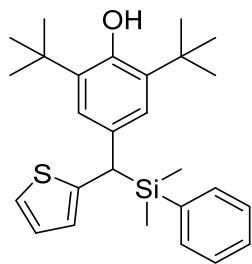

Yellow oil

$^1\text{H}$  NMR (400 MHz, Chloroform-*d*);  $\delta$  = 7.22 – 7.18 (m, 1H), 7.13 – 7.08 (m, 4H), 6.90 – 6.89 (m, 1H), 6.76 -6.74 (m, 1H), 6.70 (s, 2H), 6.60 (s, 1H), 4.81 (s, 1H), 3.74 (s, 1H), 1.20 (s, 18H), 0.15 (s, 3H), 0.14 (s, 3H).

$^{13}\text{C}$  NMR (100 MHz, Chloroform-*d*);  $\delta$  = 151.4, 146.0, 137.0, 135.2, 134.5, 131.5, 129.1, 127.4, 126.6, 124.8, 124.1, 122.1, 40.2, 34.3, 30.3, – 3.7, – 4.1.

**Methyl 2-(3,5-di-*tert*-butyl-4-hydroxyphenyl)-2-(dimethyl(phenyl)silyl)acetate 7C**

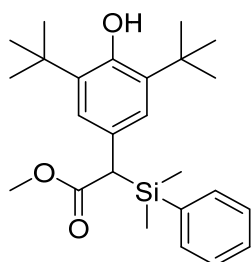

Colorless oil

$^1\text{H}$  NMR (400 MHz, Chloroform-*d*);  $\delta$  = 7.38 – 7.33 (m, 1H), 7.32 – 7.28 (m, 4H), 6.93 (s, 2H), 4.99 (s, 1H), 3.59 (s, 3H), 3.49 (s, 1H), 1.34 (s, 18H), 0.34 (s, 3H), 0.33 (s, 3H).

$^{13}\text{C}$  NMR (100 MHz, Chloroform-*d*);  $\delta$  = 173.7, 151.7, 135.8, 135.2, 134.1, 129.4, 127.6, 125.8, 125.0, 51.3, 45.3, 34.2, 30.3, – 4.3, – 4.4.

**2-(*tert*-Butyl)-4-((dimethyl(phenyl)silyl)(phenyl)methyl)-6-methylphenol 7D**

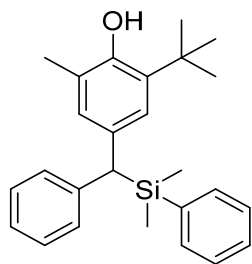

Colorless oil

$^1\text{H}$  NMR (400 MHz, Chloroform-*d*);  $\delta$  = 7.37 – 7.31 (m, 1H), 7.30 – 7.28 (m, 4H), 7.23 – 7.19 (m, 2H), 7.14 – 7.09 (m, 3H), 6.85 (s, 1H), 6.75 (s, 1H), 4.54 (s, 1H), 3.62 (s, 1H), 2.13 (s, 3H), 1.31 (s, 9H), 0.30 (s, 3H), 0.28 (s, 3H).

$^{13}\text{C}$  NMR (100 MHz, Chloroform-*d*);  $\delta$  = 150.3, 143.0, 137.9, 135.0, 134.6, 133.2, 129.1, 129.0, 128.8, 128.2, 127.5, 126.0, 125.0, 122.7, 45.0, 34.6, 29.8, 16.2, – 3.1, – 3.2.

**(*E*)-3,7-dimethylocta-2,6-dien-1-yl 3-(dimethyl(phenyl)-14-sulfanyl)propanoate 9a**

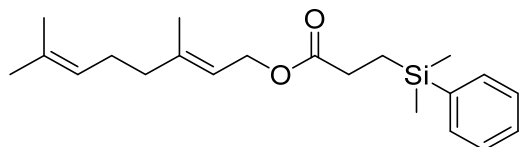

Colorless oil

$^1\text{H}$  NMR (400 MHz, Chloroform-*d*);  $\delta$  = 7.51 – 7.49 (m, 2H), 7.37 – 7.36 (m, 3H), 5.34 – 5.30 (m, 1H), 5.10 – 5.07 (m, 1H), 4.57 – 4.55 (m, 2H), 2.31 – 2.27 (m, 2H), 2.09 – 2.04 (m, 4H), 1.70 – 1.68 (m, 6H), 1.60 (s, 3H), 1.12 – 1.08 (m, 2H), 0.29 (s, 6H).

$^{13}\text{C}$  NMR (100 MHz, Chloroform-*d*);  $\delta$  = 175.0, 142.2, 138.2, 133.6, 131.8, 129.1, 127.9, 123.8, 118.3, 61.4, 39.6, 28.9, 26.3, 25.7, 17.7, 16.5, 10.9, – 3.3.

HRMS (ESI<sup>+</sup>) calcd for C<sub>21</sub>H<sub>33</sub>O<sub>2</sub>Si [M+H]<sup>+</sup>: 345.2250; found 345.2248.

**(*Z*)-3,7-dimethylocta-2,6-dien-1-yl 3-(dimethyl(phenyl)silyl)propanoate 9b**

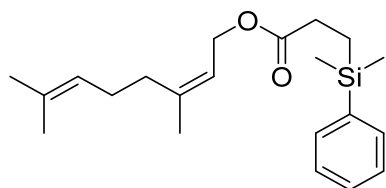

Colorless oil

$^1\text{H}$  NMR (400 MHz, Chloroform-*d*);  $\delta$  = 7.51 – 7.49 (m, 2H), 7.37 – 7.33 (m, 3H), 5.35 – 5.32 (m, 1H), 5.11 – 5.07 (m, 1H), 4.54 – 4.52 (m, 2H), 2.30 – 2.26 (m, 2H), 2.21 – 2.06 (m, 4H), 1.76 (s, 3H), 1.68 (s, 3H), 1.60 (s, 3H), 1.12 – 1.07 (m, 2H), 0.29 (s, 6H).  
 $^{13}\text{C}$  NMR (100 MHz, Chloroform-*d*);  $\delta$  = 174.9, 142.6, 138.2, 133.6, 132.2, 129.1, 127.9, 123.6, 119.2, 61.1, 32.2, 28.9, 26.7, 25.7, 23.6, 17.7, 10.9, – 3.3.  
HRMS (ESI<sup>+</sup>) calcd for C<sub>21</sub>H<sub>32</sub>O<sub>2</sub>SiNa [M+Na]<sup>+</sup>: 367.2069; found 367.2064.

### 3,7-Dimethylocta-1,6-dien-3-yl 3-(dimethyl(phenyl)silyl)propanoate 9c

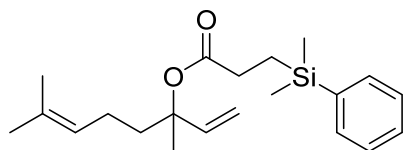

Colorless oil

$^1\text{H}$  NMR (400 MHz, Chloroform-*d*);  $\delta$  = 7.52 – 7.49 (m, 2H), 7.37 – 7.26 (m, 3H), 5.98 – 5.91 (m, 1H), 5.16 – 5.06 (m, 2H), 2.25 – 2.21 (m, 2H), 1.99 – 1.93 (m, 2H), 1.87 – 1.72 (m, 2H), 1.67 (s, 3H), 1.58 (s, 3H), 1.52 (s, 3H), 1.09 – 1.04 (m, 2H), 0.28 (s, 6H).  
 $^{13}\text{C}$  NMR (100 MHz, Chloroform-*d*);  $\delta$  = 173.7, 141.9, 138.3, 133.6, 131.8, 129.1, 127.9, 123.9, 113.1, 82.7, 39.8, 29.8, 25.7, 23.6, 22.4, 17.6, 10.8, – 3.2.  
HRMS (ESI<sup>+</sup>) calcd for C<sub>21</sub>H<sub>32</sub>O<sub>2</sub>SiNa [M+Na]<sup>+</sup>: 367.2069; found 367.2073.

### (*R*)-6-methyl-2-((*R*)-4-methylcyclohex-3-en-1-yl)hept-5-en-2-yl (dimethyl(phenyl)silyl)propanoate 9d

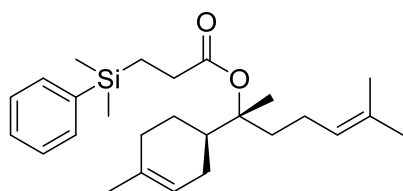

Colorless oil

$^1\text{H}$  NMR (400 MHz, Chloroform-*d*);  $\delta$  = 7.52 – 7.49 (m, 2H), 7.37 – 7.26 (m, 3H), 5.35 – 5.31 (m, 1H), 5.11 – 5.08 (m, 2H), 4.57 – 4.52 (m, 2H), 2.30 – 2.25 (m, 2H), 2.12 – 2.03 (m, 7H), 1.76 – 1.58 (m, 11H), 1.43 – 1.38 (m, 1H), 1.27 – 1.23 (m, 1H), 1.11 – 1.07 (m, 2H), 0.29 (s, 6H).  
 $^{13}\text{C}$  NMR (100 MHz, Chloroform-*d*);  $\delta$  = 174.9, 142.5, 138.2, 135.9, 133.6, 131.6,

129.1, 127.9, 124.3, 124.2, 119.2, 61.1, 32.4, 32.0, 28.9, 26.6, 26.4, 25.8, 23.6, 23.4, 17.7, 10.9, – 3.3.

HRMS (ESI<sup>+</sup>) calcd for C<sub>26</sub>H<sub>41</sub>O<sub>2</sub>Si [M+H]<sup>+</sup>: 413.2876; found 413.2873.

**2-Hydroxy-3-(2-methoxyphenoxy)propyl 3-(dimethyl(phenyl)silyl)propanoate 9e**

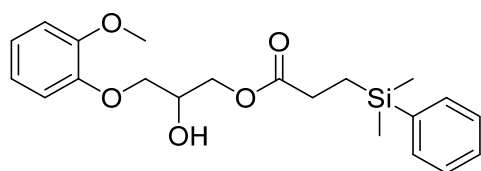

Colorless oil

<sup>1</sup>H NMR (400 MHz, Chloroform-*d*);  $\delta$  = 7.50 – 7.48 (m, 2H), 7.37 – 7.35 (m, 3H), 7.01 – 6.88 (m, 4H), 4.25 – 4.18 (m, 3H), 4.09 – 3.97 (m, 2H), 3.85 (s, 3H), 2.34 – 3.00 (m, 2H), 1.11 – 1.07 (m, 2H), 0.29 (s, 6H).

<sup>13</sup>C NMR (100 MHz, Chloroform-*d*);  $\delta$  = 175.0, 150.0, 147.9, 138.0, 133.6, 129.2, 127.9, 122.6, 121.1, 115.8, 112.0, 71.5, 68.5, 65.2, 55.8, 28.7, 10.8, – 3.3.

HRMS (ESI<sup>+</sup>) calcd for C<sub>21</sub>H<sub>29</sub>O<sub>5</sub>Si [M+H]<sup>+</sup>: 389.1784; found 389.1783.

**(1*S*,2*R*,5*S*)-2-isopropyl-5-methylcyclohexyl 3-(dimethyl(phenyl)silyl)propanoate 9f**

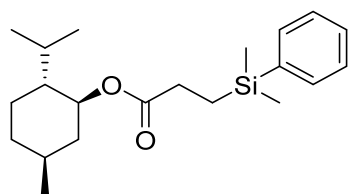

Colorless oil

<sup>1</sup>H NMR (400 MHz, Chloroform-*d*);  $\delta$  = 7.52 – 7.49 (m, 2H), 7.38 – 7.35 (m, 3H), 4.69 – 4.62 (m, 1H), 2.27 – 2.22 (m, 2H), 1.97 – 1.80 (m, 2H), 1.69 – 1.30 (m, 7H), 1.60 (s, 2H), 1.10 – 1.05 (m, 2H), 0.89 – 0.87 (m, 6H), 0.75 (d, *J* = 7 Hz, 3H), 0.29 (s, 6H).

<sup>13</sup>C NMR (100 MHz, Chloroform-*d*);  $\delta$  = 174.6, 138.3, 133.6, 129.1, 127.9, 74.0, 47.0, 40.9, 34.3, 31.4, 29.2, 26.2, 23.4, 22.1, 20.8, 16.3, 10.9, – 3.24, – 3.27.

HRMS (ESI<sup>+</sup>) calcd for C<sub>21</sub>H<sub>34</sub>O<sub>2</sub>SiNa [M+Na]<sup>+</sup>: 369.2226; found 369.2227.

**(1R,2R,4S)-1,3,3-trimethylbicyclo[2.2.1]heptan-2-yl**

3-

**(dimethyl(phenyl)silyl)propanoate 9g**

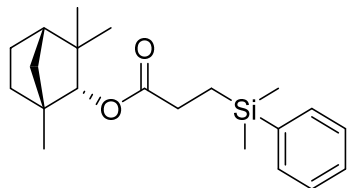

Colorless oil

$^1\text{H}$  NMR (400 MHz, Chloroform-*d*);  $\delta$  = 7.54 – 7.50 (m, 2H), 7.40 – 7.32 (m, 3H), 4.35 (s, 1H), 2.32 – 2.28 (m, 2H), 1.75 – 1.55 (m, 5H), 1.48 – 1.40 (m, 1H), 1.19 – 1.13 (m, 3H), 1.10 (s, 3H), 1.02 (s, 3H), 0.75 (s, 3H), 0.30 (s, 6H).

$^{13}\text{C}$  NMR (100 MHz, Chloroform-*d*);  $\delta$  = 175.5, 138.3, 133.6, 129.1, 127.9, 86.0, 48.34, 48.25, 41.4, 39.5, 29.7, 28.9, 26.6, 25.9, 20.2, 19.5, 11.0, – 3.23, – 3.24.

HRMS (ESI<sup>+</sup>) calcd for C<sub>21</sub>H<sub>33</sub>O<sub>2</sub>Si [M+H]<sup>+</sup>: 345.2250; found 345.2250.

**(1S)-1,7,7-trimethylbicyclo[2.2.1]heptan-2-yl 3-(dimethyl(phenyl)silyl)propanoate**

**9h**

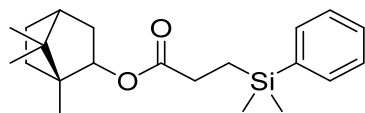

Colorless oil

$^1\text{H}$  NMR (400 MHz, Chloroform-*d*);  $\delta$  = 7.51 – 7.49 (m, 2H), 7.37 – 7.35 (m, 3H), 4.65 – 4.62 (m, 1H), 2.26 – 2.22 (m, 2H), 1.81 – 1.50 (m, 6H), 1.10 – 1.06 (m, 3H), 0.96 (s, 3H), 0.86 – 0.82 (m, 6H), 0.29 (s, 6H).

$^{13}\text{C}$  NMR (100 MHz, Chloroform-*d*);  $\delta$  = 174.5, 138.3, 133.6, 129.1, 127.9, 80.9, 48.7, 46.9, 45.0, 38.8, 33.8, 29.2, 27.1, 20.2, 20.0, 11.5, 10.8, – 3.2, – 3.3.

HRMS (ESI<sup>+</sup>) calcd for C<sub>21</sub>H<sub>33</sub>O<sub>2</sub>Si [M+H]<sup>+</sup>: 345.2250; found 345.2247.

**2-(4-(3-(10H-phenothiazin-10-yl)propyl)piperazin-1-yl)ethyl**

3-

**(dimethyl(phenyl)silyl)propanoate 9i**



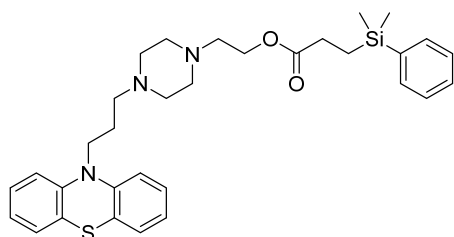

Colorless oil

$^1\text{H}$  NMR (400 MHz, Chloroform-*d*);  $\delta$  = 7.51 – 7.48 (m, 2H), 7.39 – 7.35 (m, 4H), 7.17 – 7.11 (m, 2H), 7.02 – 6.84 (m, 5H), 4.15 (t,  $J$  = 6.0 Hz, 2H), 3.90 (t,  $J$  = 6.8 Hz, 2H), 2.59 – 2.44 (m, 12H), 2.30 – 2.25 (m, 2H), 1.95 – 1.92 (m, 2H), 1.10 – 1.05 (m, 2H), 0.29 (s, 6H).

$^{13}\text{C}$  NMR (100 MHz, Chloroform-*d*);  $\delta$  = 174.8, 146.4, 144.4, 138.1, 133.5, 133.1, 133.0, 129.5, 129.1, 127.82, 127.80, 127.44, 127.35, 124.7, 123.4, 122.8, 122.2, 115.8, 115.7, 61.7, 56.5, 55.4, 53.2, 53.1, 45.3, 28.8, 24.1, 10.7, – 3.4.

HRMS (ESI<sup>+</sup>) calcd for C<sub>32</sub>H<sub>42</sub>N<sub>3</sub>O<sub>2</sub>SSi [M+H]<sup>+</sup>: 560.2767; found 560.2769.

### 2-methyl-4-oxo-4*H*-pyran-3-yl 3-(dimethyl(phenyl)silyl)propanoate

**9j**

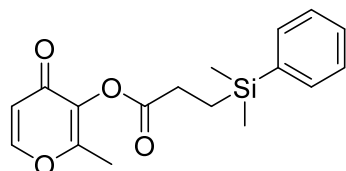

Colorless oil

$^1\text{H}$  NMR (400 MHz, Chloroform-*d*);  $\delta$  = 7.66 – 7.64 (m, 1H), 7.53 – 7.50 (m, 2H), 7.38 – 7.37 (m, 3H), 6.40 (d,  $J$  = 5.8 Hz, 1H), 2.60 – 2.55 (m, 2H), 2.21 (s, 3H), 1.24 – 1.19 (m, 2H), 0.33 (s, 6H).

$^{13}\text{C}$  NMR (100 MHz, Chloroform-*d*);  $\delta$  = 172.1, 171.7, 159.0, 154.1, 138.7, 137.9, 133.6, 129.2, 128.0, 116.9, 28.4, 15.0, 10.9, – 3.3.

HRMS (ESI<sup>+</sup>) calcd for C<sub>18</sub>H<sub>25</sub>O<sub>3</sub>Si [M+H]<sup>+</sup>: 317.1573; found 317.1574.

### 2-Isopropyl-5-methylphenyl 3-(dimethyl(phenyl)silyl)propanoate **9k**

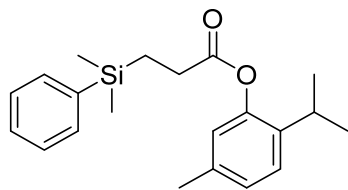

Colorless oil

$^1\text{H}$  NMR (400 MHz, Chloroform-*d*);  $\delta$  = 7.60 – 7.54 (m, 2H), 7.41 – 7.33 (m, 3H), 7.19 – 7.17 (m, 1H), 7.02 – 7.00 (m, 1H), 6.74 (s, 1H), 2.99 – 2.88 (m, 1H), 2.57 – 2.52 (m, 2H), 1.30 (s, 3H), 1.25 – 1.23 (m, 2H), 1.18 (d,  $J$  = 6.9 Hz, 6H), 0.36 (s, 6H).

$^{13}\text{C}$  NMR (100 MHz, Chloroform-*d*);  $\delta$  = 173.7, 148.0, 138.0, 137.0, 136.5, 133.6, 129.2, 128.0, 127.1, 126.4, 122.7, 29.0, 27.0, 23.1, 20.9, 11.0, – 3.2.

HRMS (ESI<sup>+</sup>) calcd for C<sub>21</sub>H<sub>28</sub>O<sub>2</sub>SiNa [M+Na]<sup>+</sup>: 363.1756; found 363.1755.

### 1-Chloro-3-(2-methyl-5-nitro-1*H*-imidazol-1-yl)propan-2-yl

3-

#### (dimethyl(phenyl)silyl)propanoate 9l

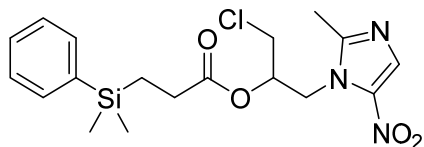

Colorless oil

$^1\text{H}$  NMR (400 MHz, Chloroform-*d*);  $\delta$  = 7.94 (s, 1H), 7.48 – 7.45 (m, 2H), 7.38 – 7.36 (m, 3H), 5.36 – 5.33 (m, 1H), 4.74 – 4.70 (m, 1H), 4.49 – 4.43 (m, 1H), 3.80 – 3.71 (m, 2H), 2.48 (s, 3H), 2.26 – 2.09 (m, 2H), 1.03 – 0.88 (m, 2H), 0.27 (s, 6H).

$^{13}\text{C}$  NMR (100 MHz, Chloroform-*d*);  $\delta$  = 173.5, 151.0, 138.6, 137.6, 133.5, 133.2, 129.3, 128.0, 70.7, 47.1, 43.4, 28.6, 14.4, 10.7, – 3.37, – 3.43.

HRMS (ESI<sup>+</sup>) calcd for C<sub>18</sub>H<sub>25</sub>ClN<sub>3</sub>O<sub>4</sub>Si [M+H]<sup>+</sup>: 410.1303; found 410.1307.

### (1*S*,3*R*,7*S*,8*S*,8*aR*)-8-(2-((2*R*,4*S*)-4-((3-

#### (dimethyl(phenyl)silyl)propanoyl)oxy)tetrahydro-2*H*-pyran-2-yl)ethyl)-3,7-

#### dimethyl-1,2,3,7,8,8*a*-hexahydronaphthalen-1-yl (*S*)-2-methylbutanoate 9m

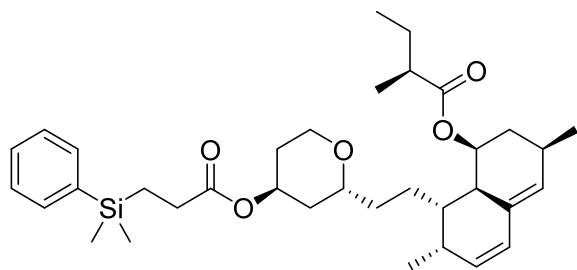

Colorless oil

$^1\text{H}$  NMR (400 MHz, Chloroform-*d*);  $\delta$  = 7.61 – 7.59 (m, 1H), 7.50 – 7.48 (m, 2H), 7.39 – 7.35 (m, 5H), 5.99 – 5.97 (m, 1H), 5.79 – 5.75 (m, 1H), 5.53 – 5.51 (m, 1H), 5.36 – 5.34 (m, 1H), 3.93 – 3.89 (m, 1H), 2.46 – 2.19 (m, 6H), 2.01 – 1.87 (m, 2H), 1.80 – 1.74 (m, 2H), 1.69 – 1.58 (m, 5H), 1.45 – 1.33 (m, 3H), 1.11 – 1.06 (m, 6H), 0.87 – 0.83 (m, 6H), 0.41 (s, 3H), 0.34 (s, 6H).

$^{13}\text{C}$  NMR (100 MHz, Chloroform-*d*);  $\delta$  = 176.6, 173.9, 135.6, 133.9, 133.1, 133.0, 131.6, 129.7, 129.6, 128.3, 128.1, 127.9, 78.7, 67.8, 41.4, 37.2, 36.7, 32.7, 32.6, 30.7, 29.9, 28.6, 27.5, 26.9, 24.8, 22.8, 16.3, 15.1, 13.9, 11.7, – 5.4, – 5.5.

HRMS (ESI<sup>+</sup>) calcd for C<sub>35</sub>H<sub>52</sub>O<sub>5</sub>SiNa [M+Na]<sup>+</sup>: 603.3482; found 603.3485.

**(1*R*,2*S*)-2-(2,2-dichloroacetamido)-3-fluoro-1-(4-(methylsulfonyl)phenyl)propyl 3-(dimethyl(phenyl)silyl)propanoate 9n**

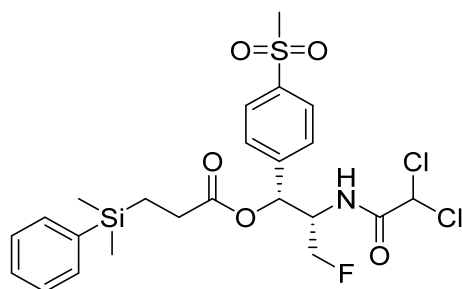

Colorless oil

$^1\text{H}$  NMR (400 MHz, Chloroform-*d*);  $\delta$  = 7.98 – 7.96 (m, 2H), 7.60 – 7.58 (m, 2H), 7.48 – 7.34 (m, 5H), 6.91 – 6.87 (m, 1H), 6.11 (d,  $J$  = 7.4 Hz, 1H), 5.88 (s, 1H), 4.53 – 4.18 (m, 3H), 3.06 (s, 3H), 2.36 – 2.31 (m, 2H), 1.07 (t,  $J$  = 8.7 Hz, 2H), 0.28 (s, 6H).

$^{13}\text{C}$  NMR (100 MHz, Chloroform-*d*);  $\delta$  = 173.9, 164.2, 142.4, 141.2, 137.6, 133.5, 129.3, 128.1, 128.1, 128.0, 82.4, 80.7, 72.6, 66.0, 54.2, 54.0, 44.5, 28.8, 10.7, – 3.35, – 3.37.

HRMS (ESI<sup>+</sup>) calcd for C<sub>23</sub>H<sub>28</sub>Cl<sub>2</sub>FNO<sub>5</sub>SSiNa [M+Na]<sup>+</sup>: 570.0716; found 570.0711.

**(5-(5-Methyl-2,4-dioxo-3,4-dihydropyrimidin-1(2H)-yl)-2,5-dihydrofuran-2-yl)methyl 3-(dimethyl(phenyl)silyl)propanoate 9o**

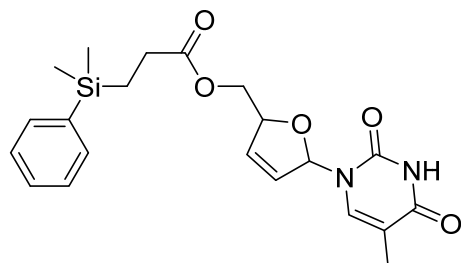

Colorless oil

<sup>1</sup>H NMR (400 MHz, Chloroform-*d*);  $\delta$  = 9.23 (s, 1H), 7.48 – 7.46 (m, 2H), 7.36 – 7.33 (m, 3H), 7.15 (s, 1H), 7.00 – 6.98 (m, 1H), 6.23 – 6.21 (m, 1H), 5.88 – 5.85 (m, 1H), 5.00 – 4.99 (m, 1H), 4.38 – 4.33 (m, 1H), 4.18 – 4.15 (m, 1H), 2.30 – 2.26 (m, 2H), 1.80 (s, 3H), 1.11 – 1.07 (m, 2H), 0.28 (s, 6H).

<sup>13</sup>C NMR (100 MHz, Chloroform-*d*);  $\delta$  = 174.5, 163.8, 150.8, 137.7, 135.4, 133.5, 133.1, 129.3, 128.0, 127.4, 111.2, 89.7, 84.3, 64.8, 28.7, 12.6, 10.7, – 3.27, – 3.30.

HRMS (ESI<sup>+</sup>) calcd for C<sub>21</sub>H<sub>26</sub>N<sub>2</sub>O<sub>5</sub>SiNa [M+Na]<sup>+</sup>: 437.1509; found 437.1513.

**(*R*)-(6-methoxyquinolin-4-yl)((1*S*,2*S*,4*S*,5*R*)-5-vinylquinuclidin-2-yl)methyl 3-(dimethyl(phenyl)silyl)propanoate 9p**

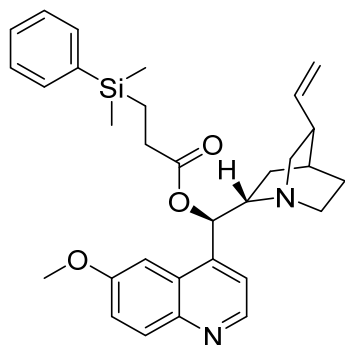

Colorless oil

<sup>1</sup>H NMR (400 MHz, Chloroform-*d*);  $\delta$  = 8.73 (d, *J* = 4.6 Hz, 1H), 8.02 (d, *J* = 9.2 Hz, 1H), 7.48 – 7.44 (m, 3H), 7.38 – 7.26 (m, 5H), 6.48 (s, 1H), 5.87 – 5.79 (m, 1H), 5.04 – 4.99 (m, 2H), 3.94 (s, 3H), 3.38 – 3.33 (m, 1H), 3.07 – 3.01 (m, 2H), 2.65 – 2.58 (m,

2H), 2.35 – 2.26 (m, 3H), 1.89 – 1.84 (m, 2H), 1.54 – 1.47 (m, 3H), 1.08 – 1.04 (m, 2H), 0.26 (d,  $J = 4.3$  Hz, 6H).

$^{13}\text{C}$  NMR (100 MHz, Chloroform-*d*);  $\delta = 174.0, 157.9, 147.5, 144.8, 143.6, 141.7, 137.8, 133.5, 131.8, 129.2, 127.9, 127.1, 121.9, 119.0, 114.6, 101.5, 59.1, 56.5, 55.7, 42.4, 29.0, 27.5, 10.7, -3.30, -3.32$ .

HRMS (ESI<sup>+</sup>) calcd for  $\text{C}_{31}\text{H}_{39}\text{N}_2\text{O}_3\text{Si}$   $[\text{M}+\text{H}]^+$ : 515.2730; found 515.2733.

### 3-Hydroxy-1,3-diphenylpropan-1-one 10

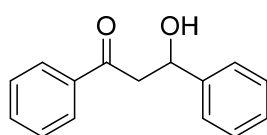

Colorless oil

$^1\text{H}$  NMR (400 MHz, Chloroform-*d*);  $\delta = 7.97 - 7.95$  (m, 2H), 7.61 – 7.57 (m, 1H), 7.49 – 7.43 (m, 4H), 7.41 – 7.37 (m, 2H), 7.33 – 7.29 (m, 1H), 5.37 – 5.34 (m, 1H), 3.71 (br, 1H), 3.39 – 3.37 (m, 2H).

$^{13}\text{C}$  NMR (100 MHz, Chloroform-*d*);  $\delta = 200.2, 143.0, 136.5, 133.7, 128.8, 128.6, 128.2, 127.7, 125.8, 70.0, 47.5$ .

### 3-Hydroxybutanenitrile 11

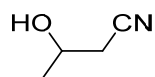

Colorless oil

$^1\text{H}$  NMR (400 MHz, Chloroform-*d*);  $\delta = 4.19 - 4.16$  (m, 1H), 2.57 – 2.48 (m, 2H), 1.94 (br, 1H), 1.38 (d,  $J = 4.2$  Hz, 3H).

$^{13}\text{C}$  NMR (100 MHz, Chloroform-*d*);  $\delta = 99.9, 64.2, 27.5, 22.8$ .

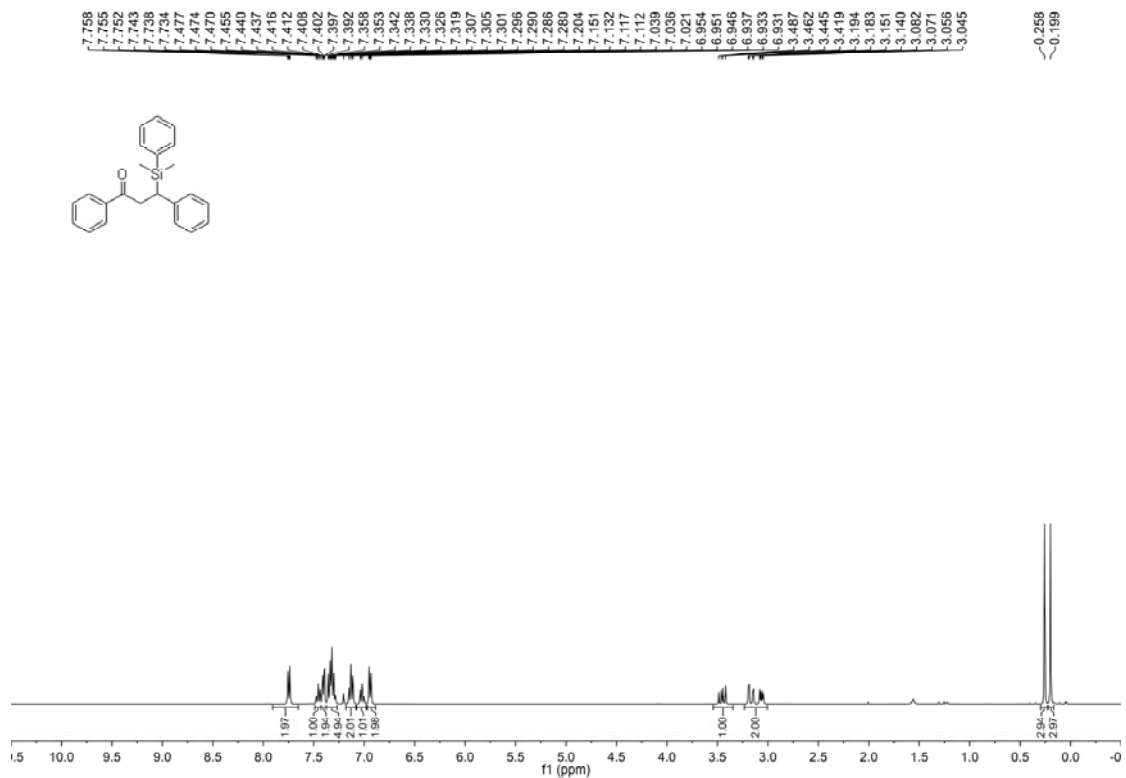

$^1\text{H}$  NMR (400 MHz,  $\text{CDCl}_3$ ) of compound **3a**

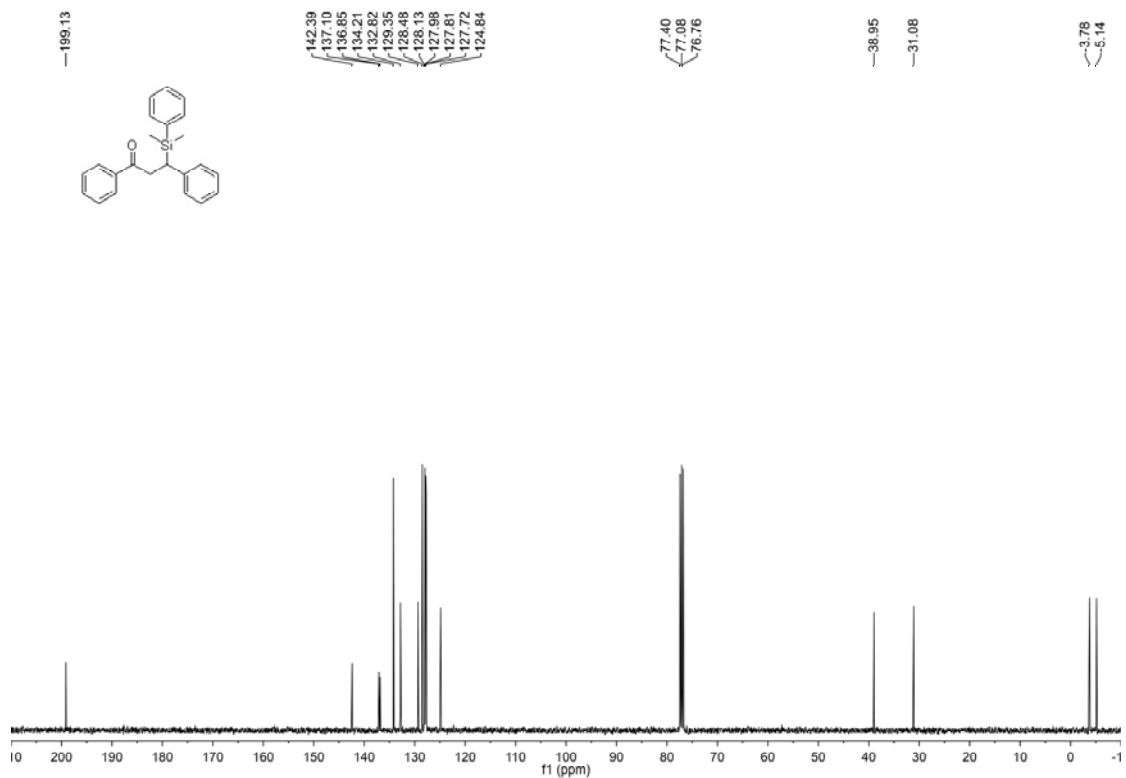

$^{13}\text{C}\{^1\text{H}\}$  NMR (100 MHz,  $\text{CDCl}_3$ ) of compound **3a**

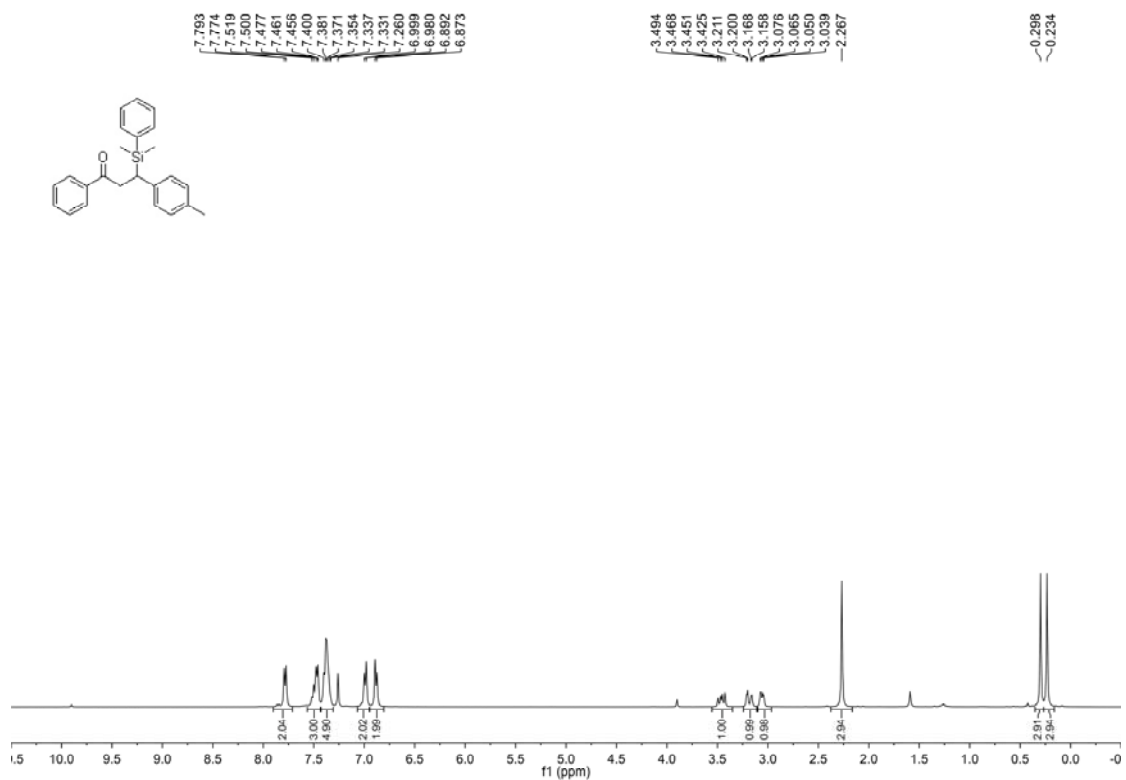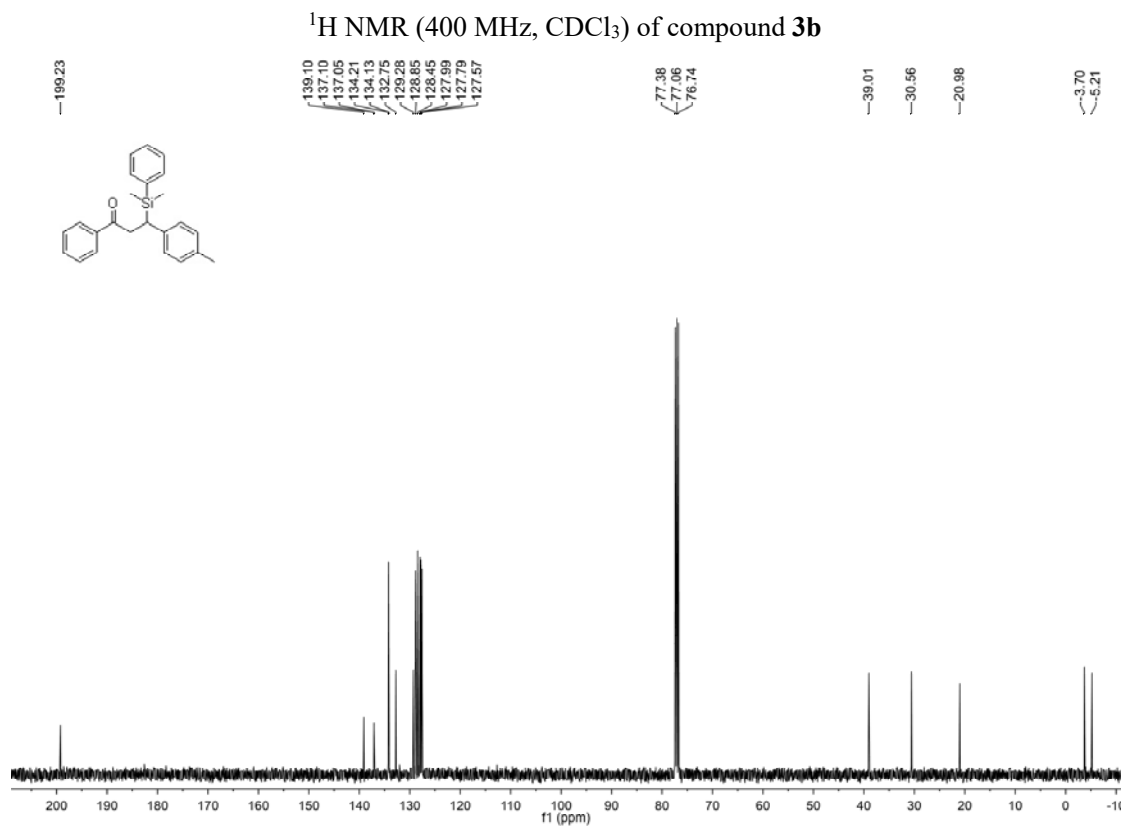

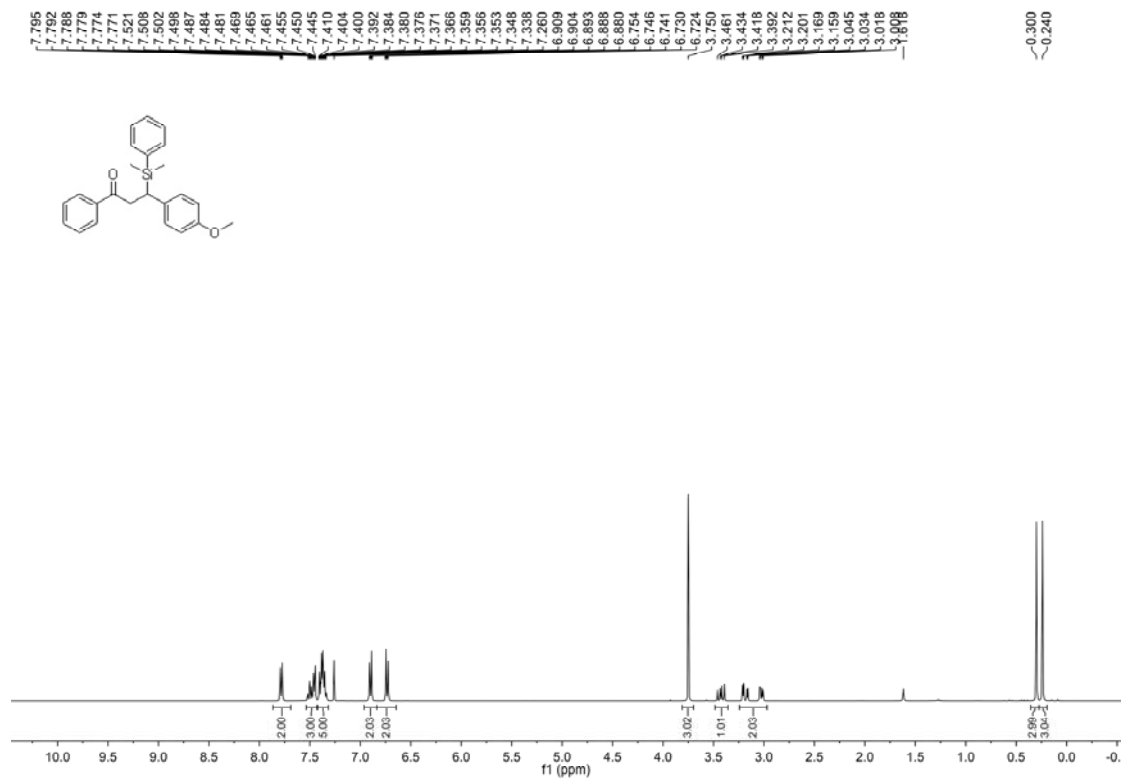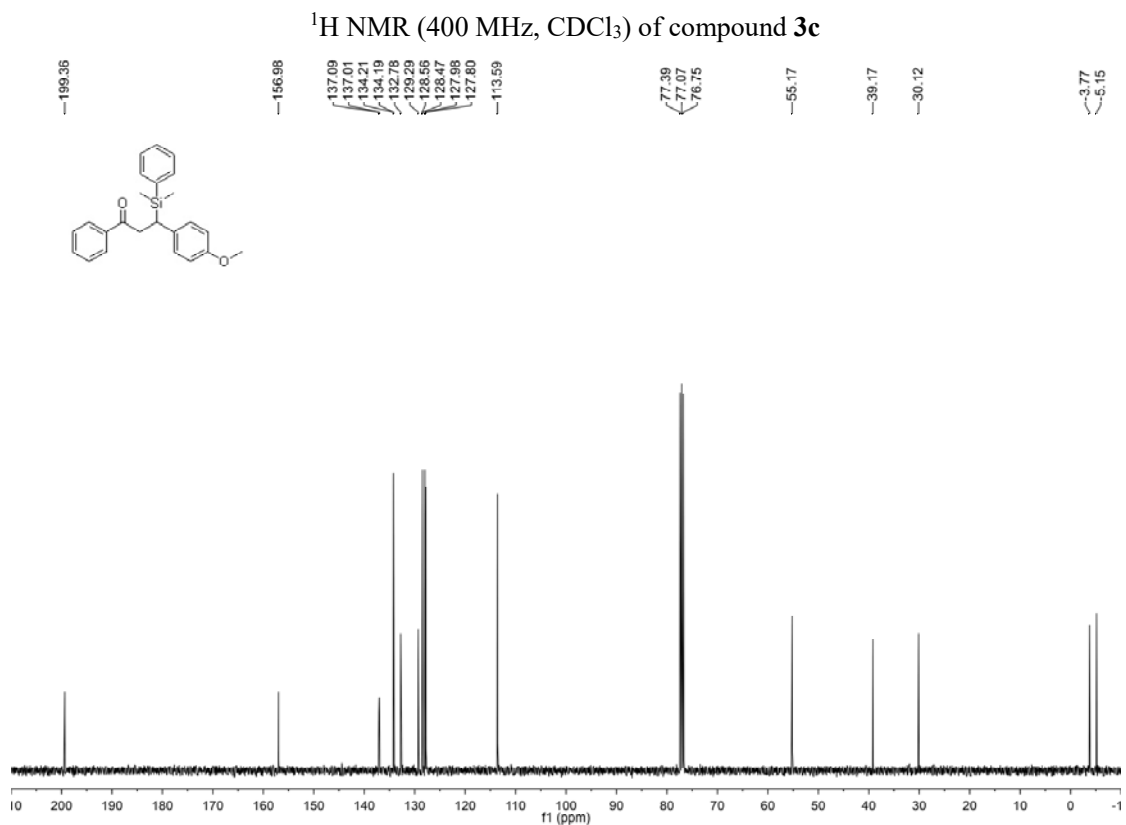



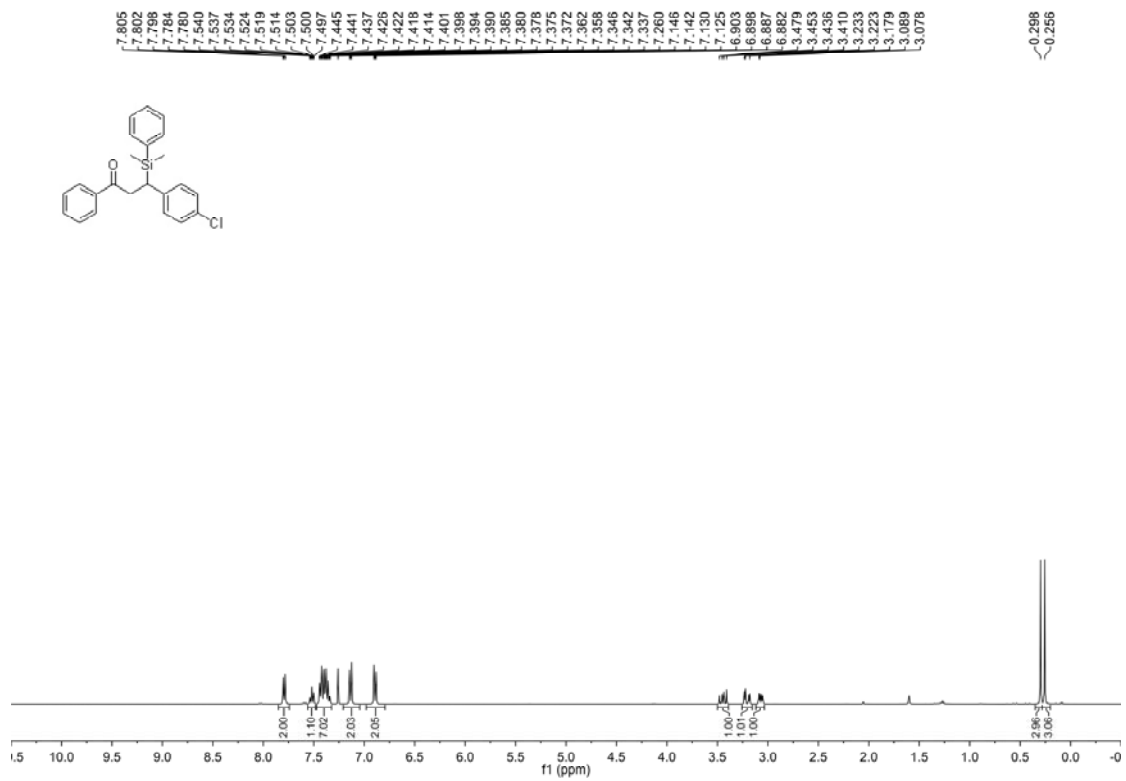

$^1\text{H}$  NMR (400 MHz,  $\text{CDCl}_3$ ) of compound **3d**

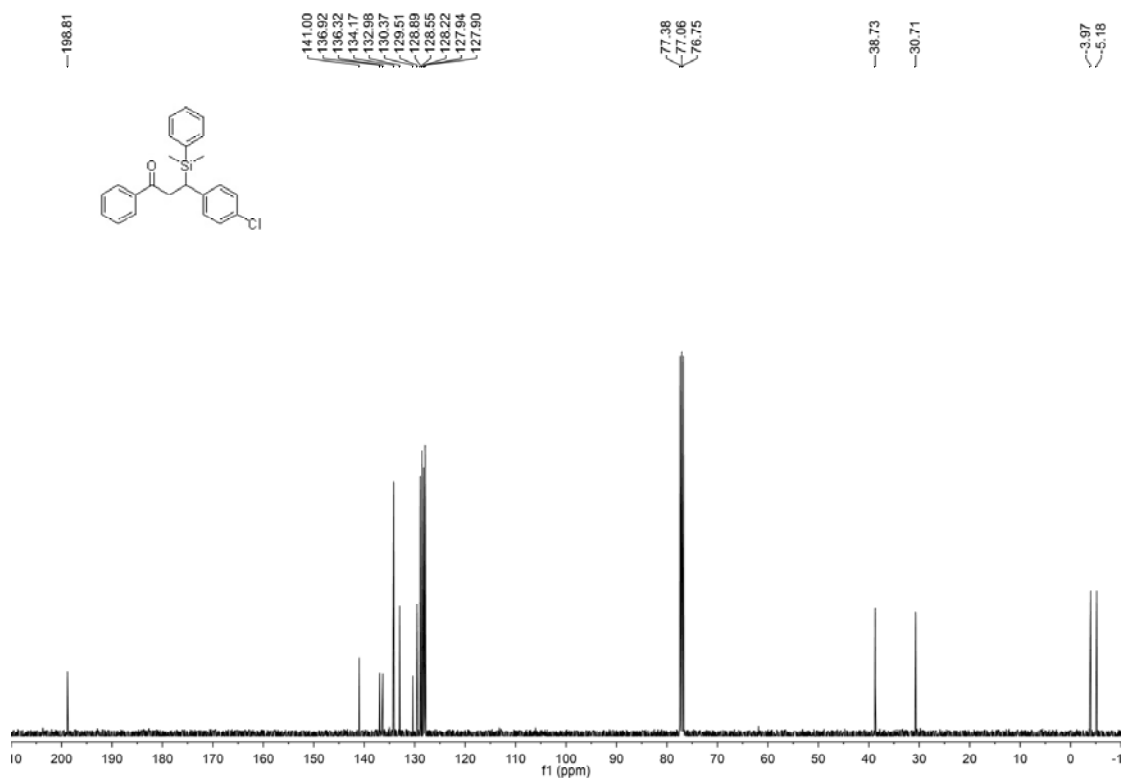

$^{13}\text{C}\{^1\text{H}\}$  NMR (100 MHz,  $\text{CDCl}_3$ ) of compound **3d**

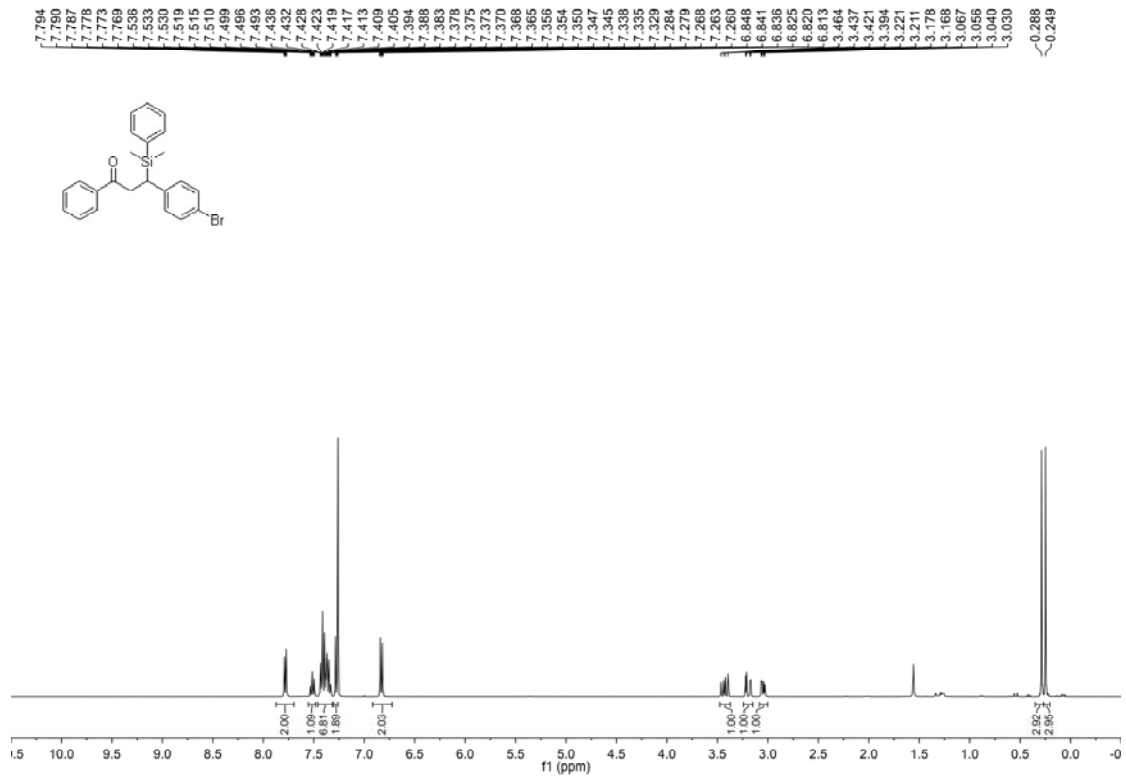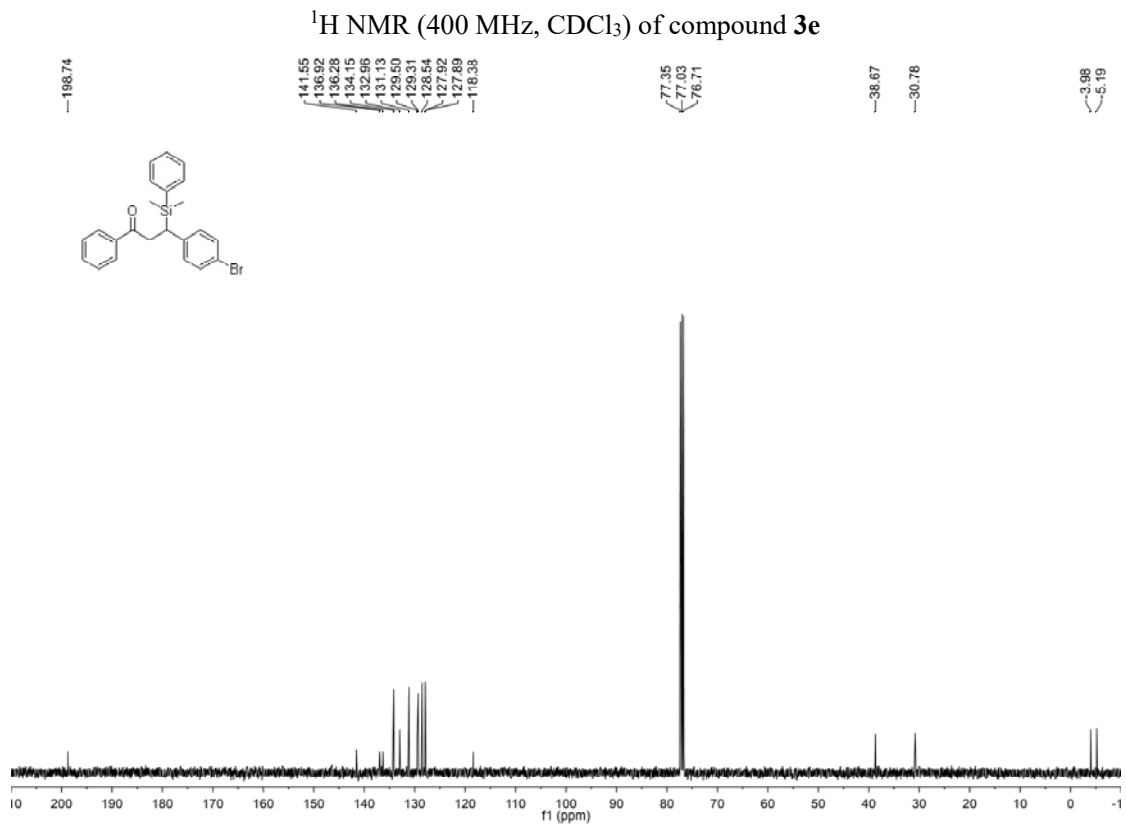

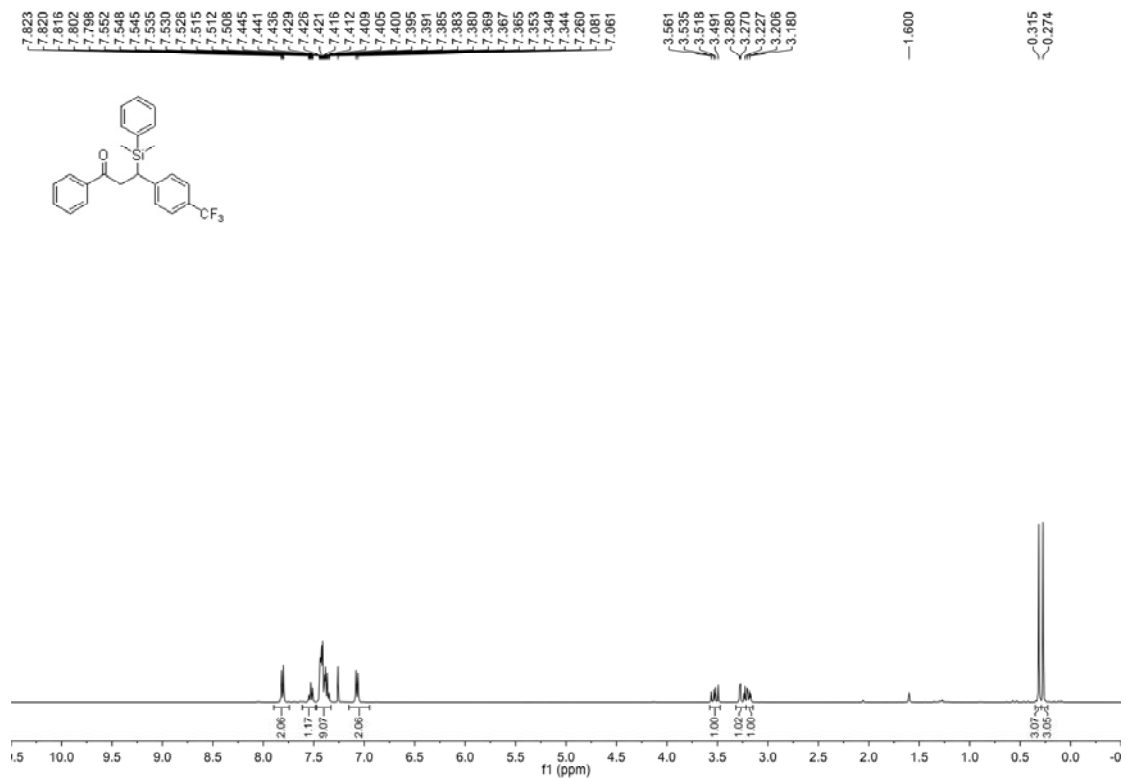

<sup>1</sup>H NMR (400 MHz, CDCl<sub>3</sub>) of compound **3f**

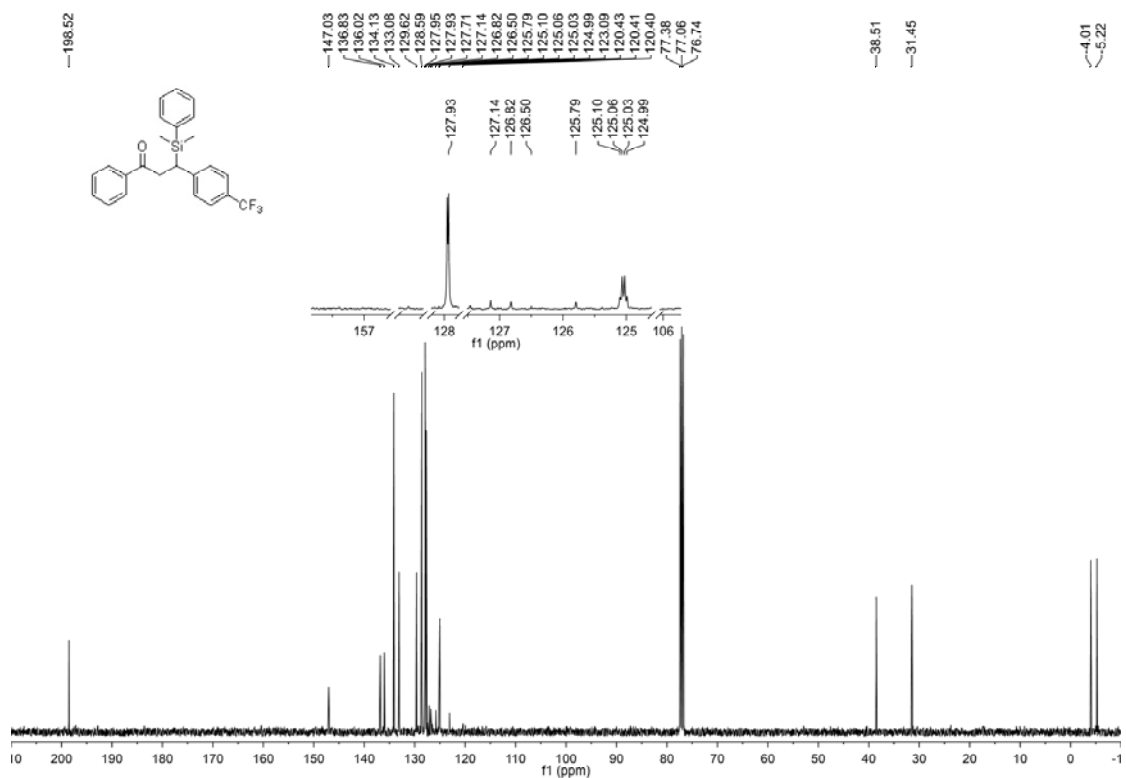

<sup>13</sup>C {<sup>1</sup>H} NMR (100 MHz, CDCl<sub>3</sub>) of compound **3f**

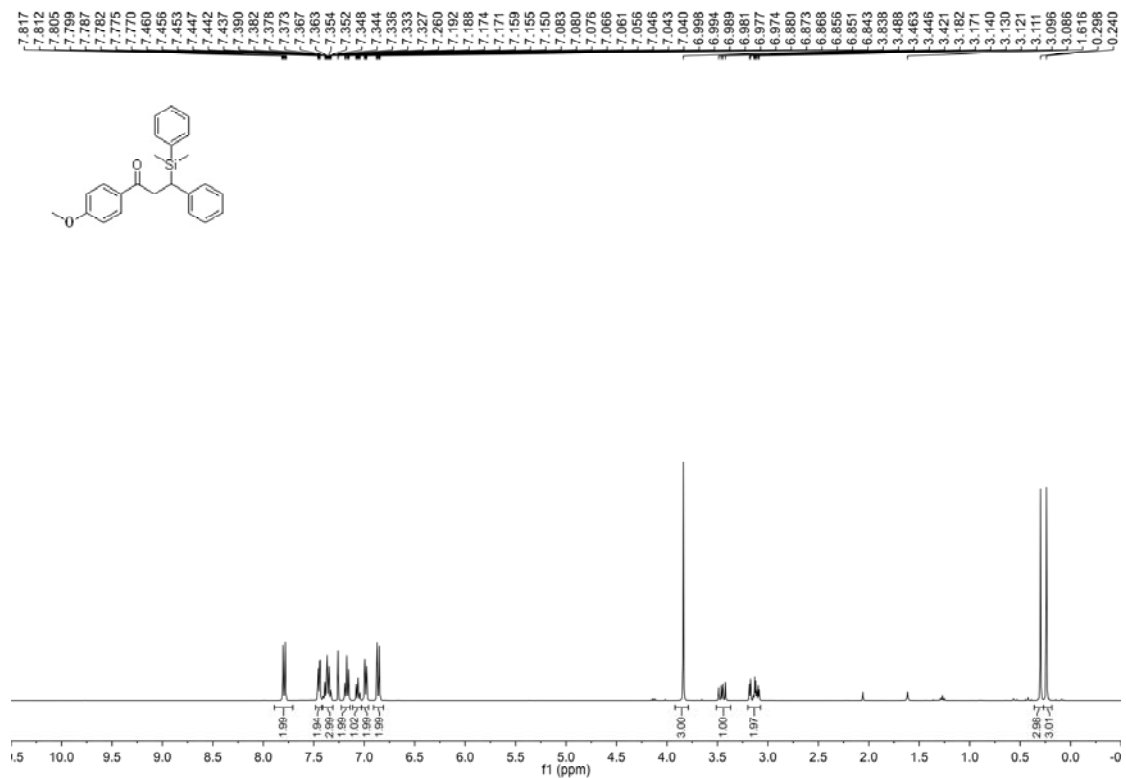

$^1\text{H}$  NMR (400 MHz,  $\text{CDCl}_3$ ) of compound **3g**

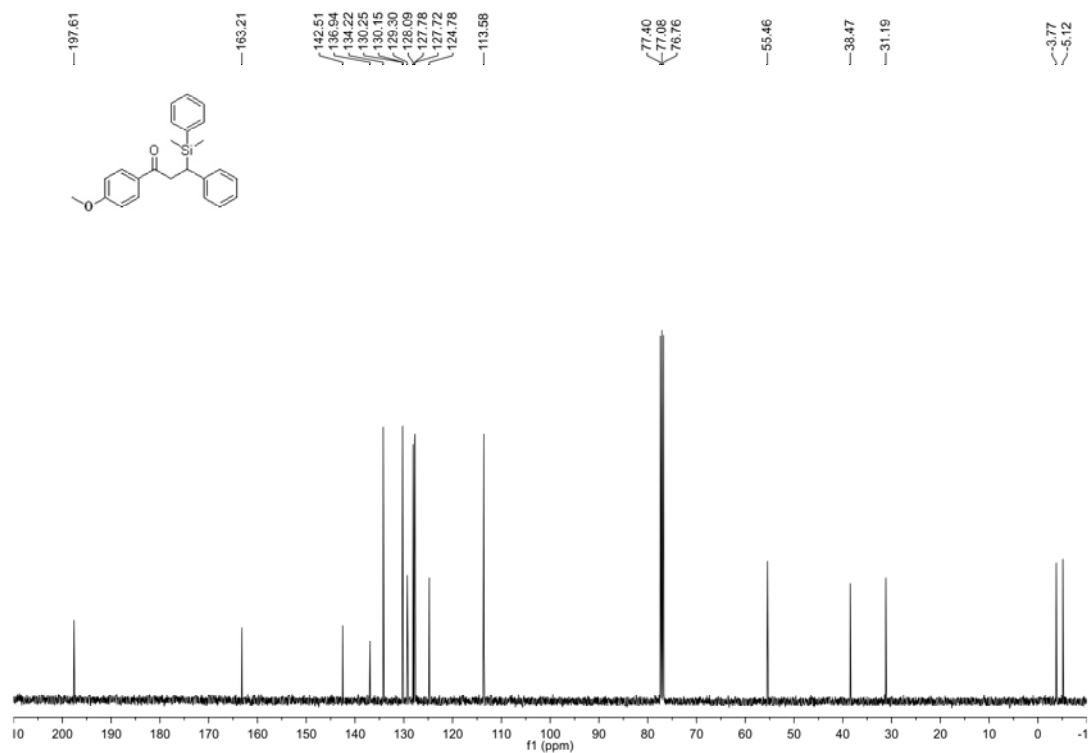

$^{13}\text{C}\{^1\text{H}\}$  NMR (100 MHz,  $\text{CDCl}_3$ ) of compound **3g**

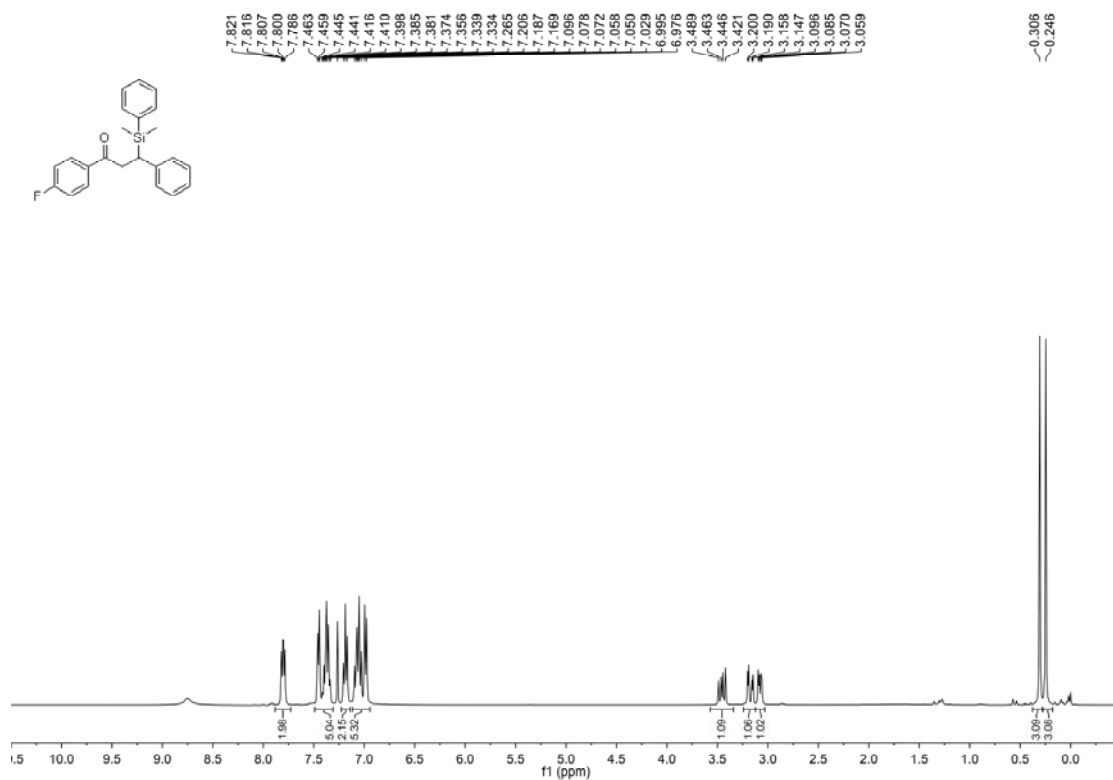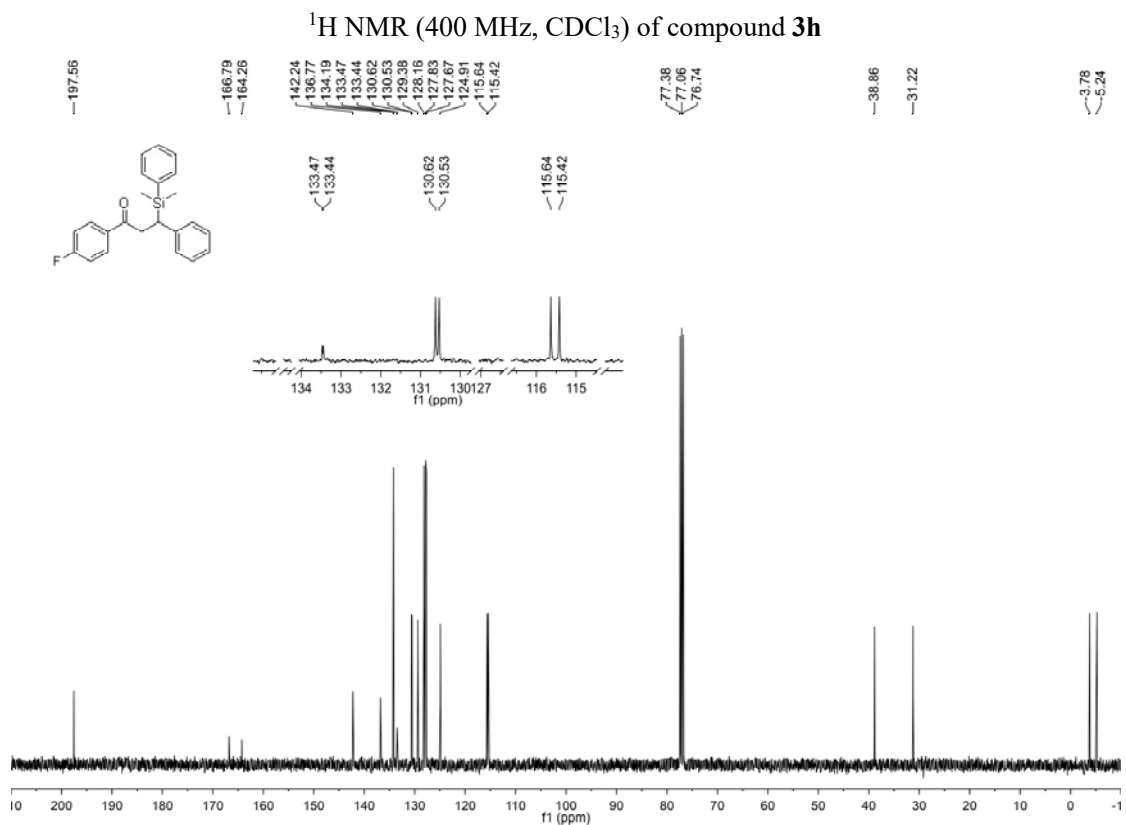

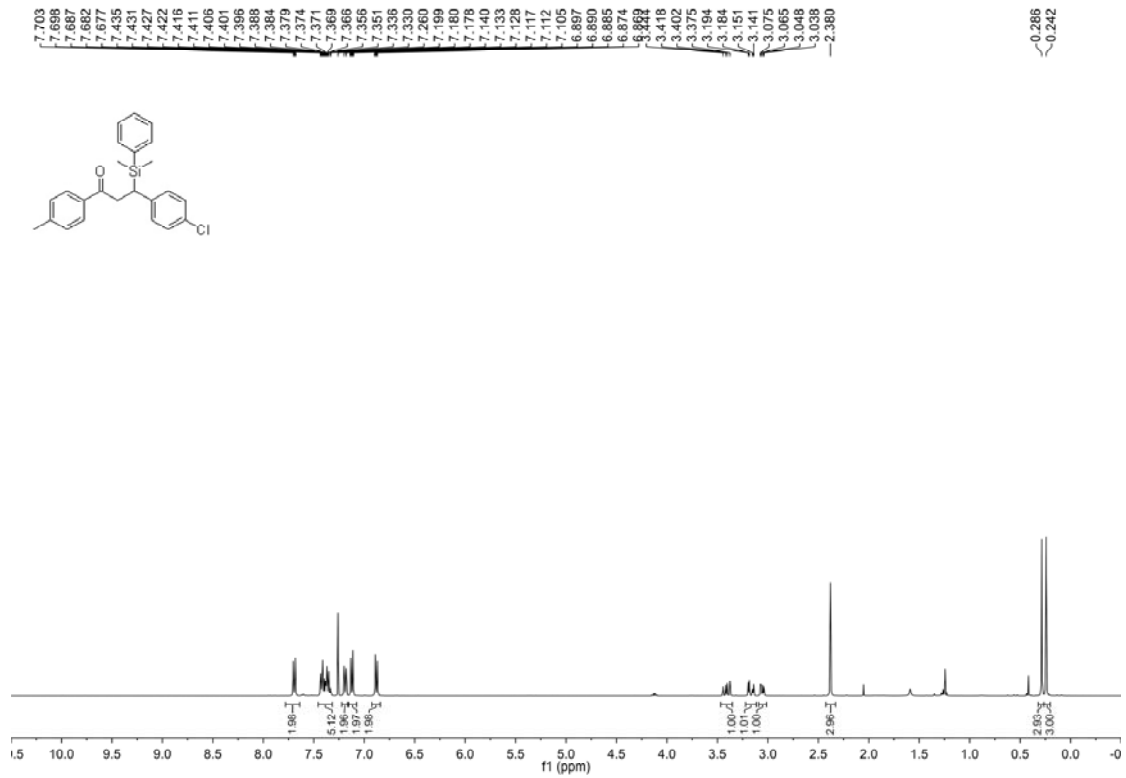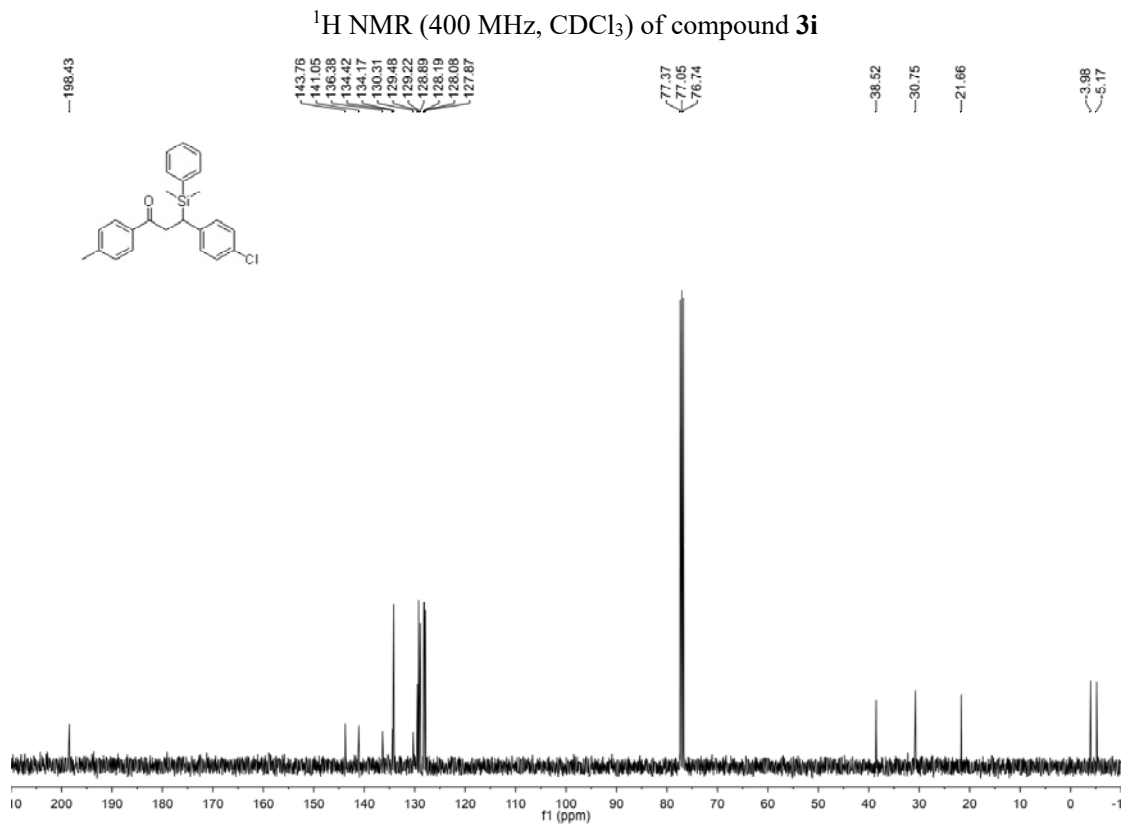

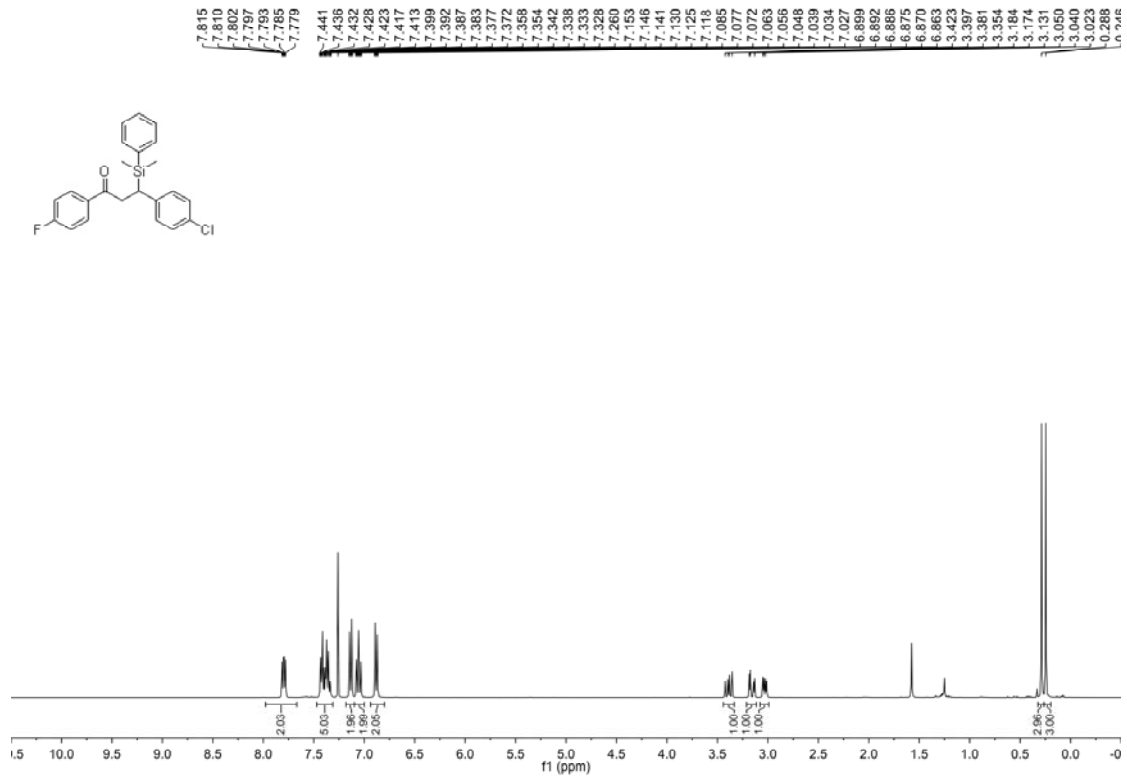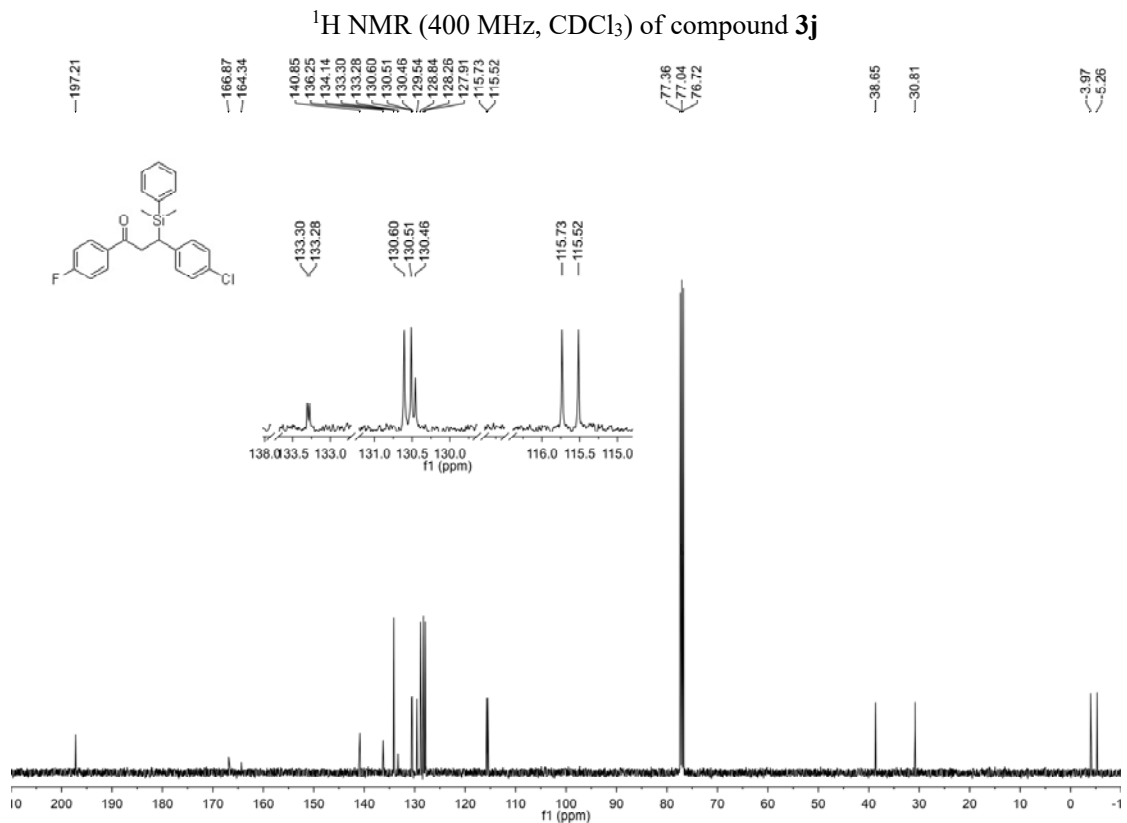

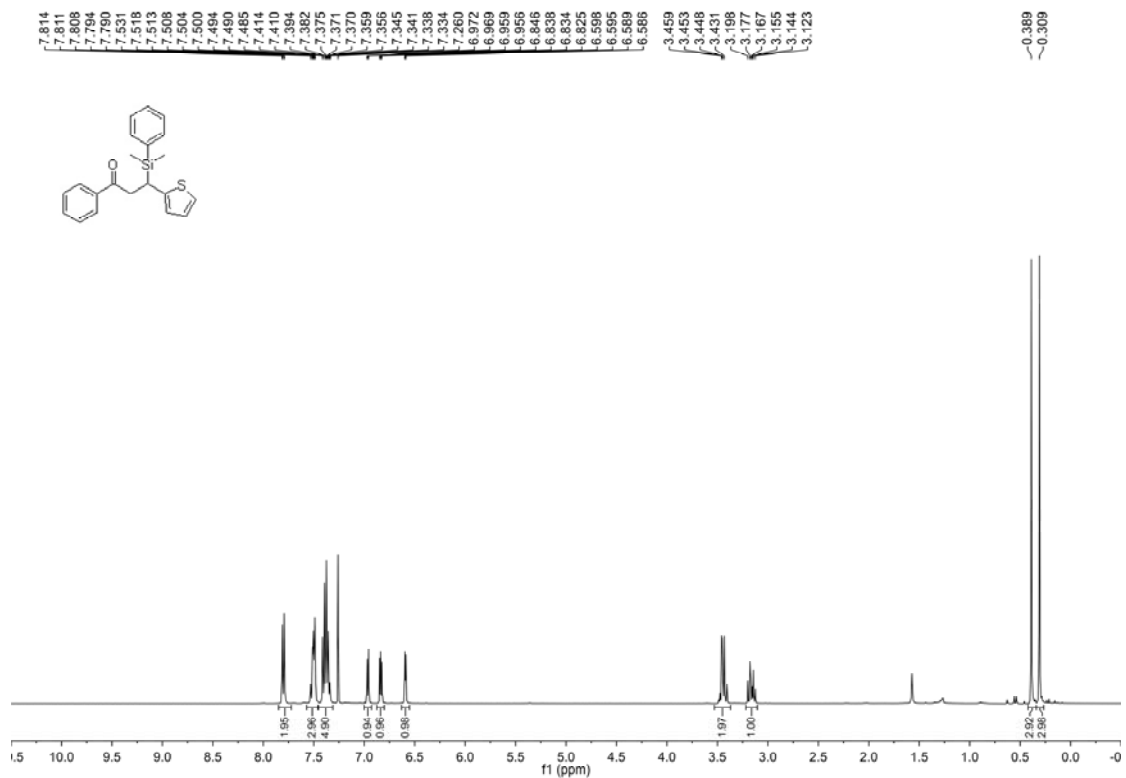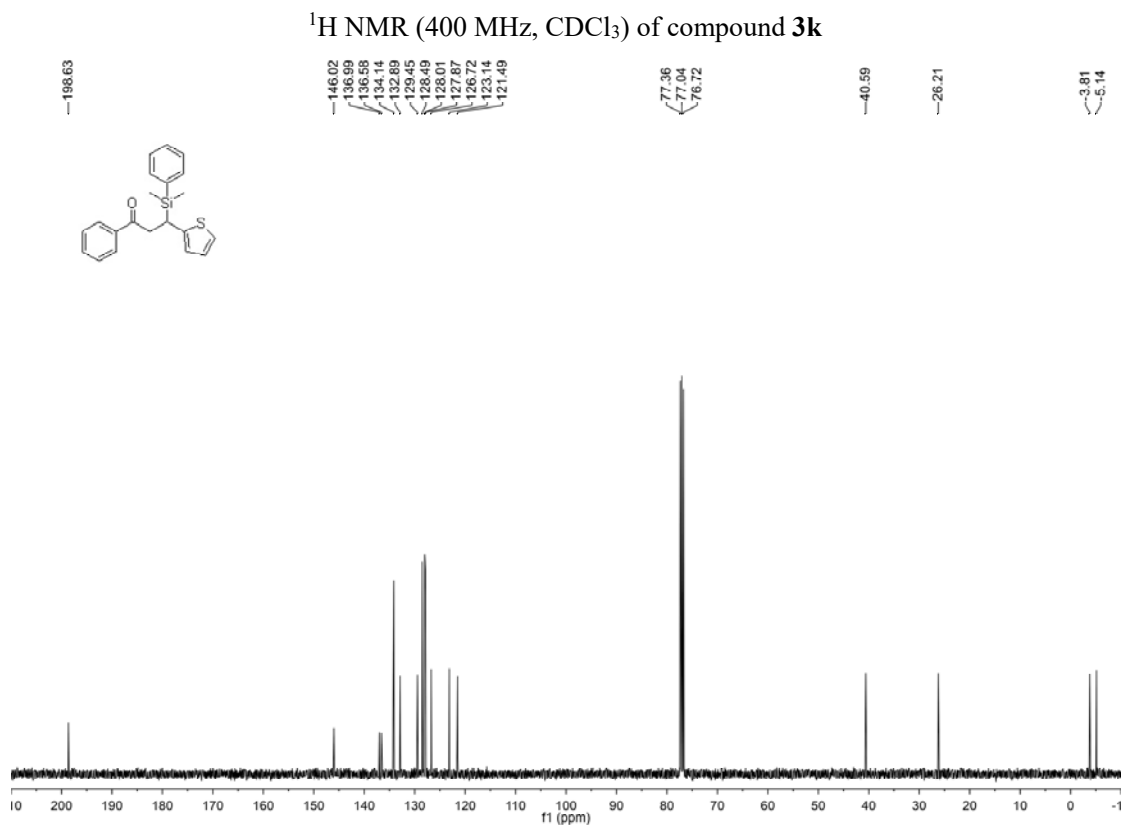



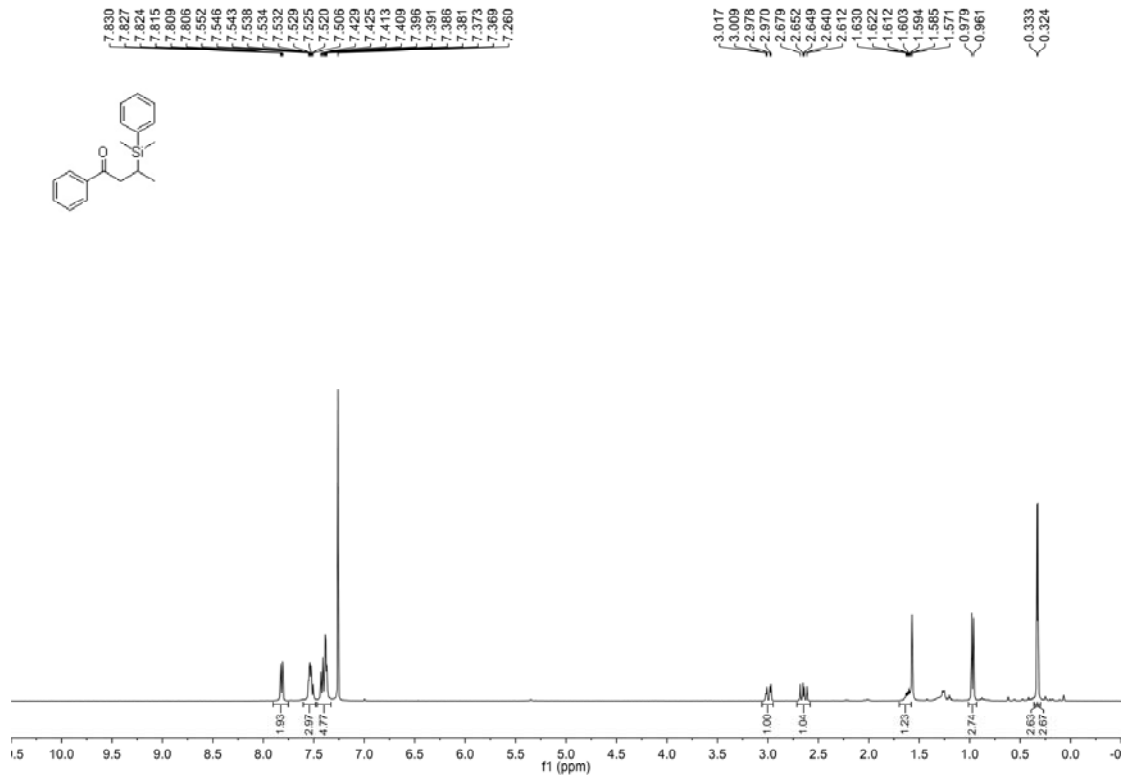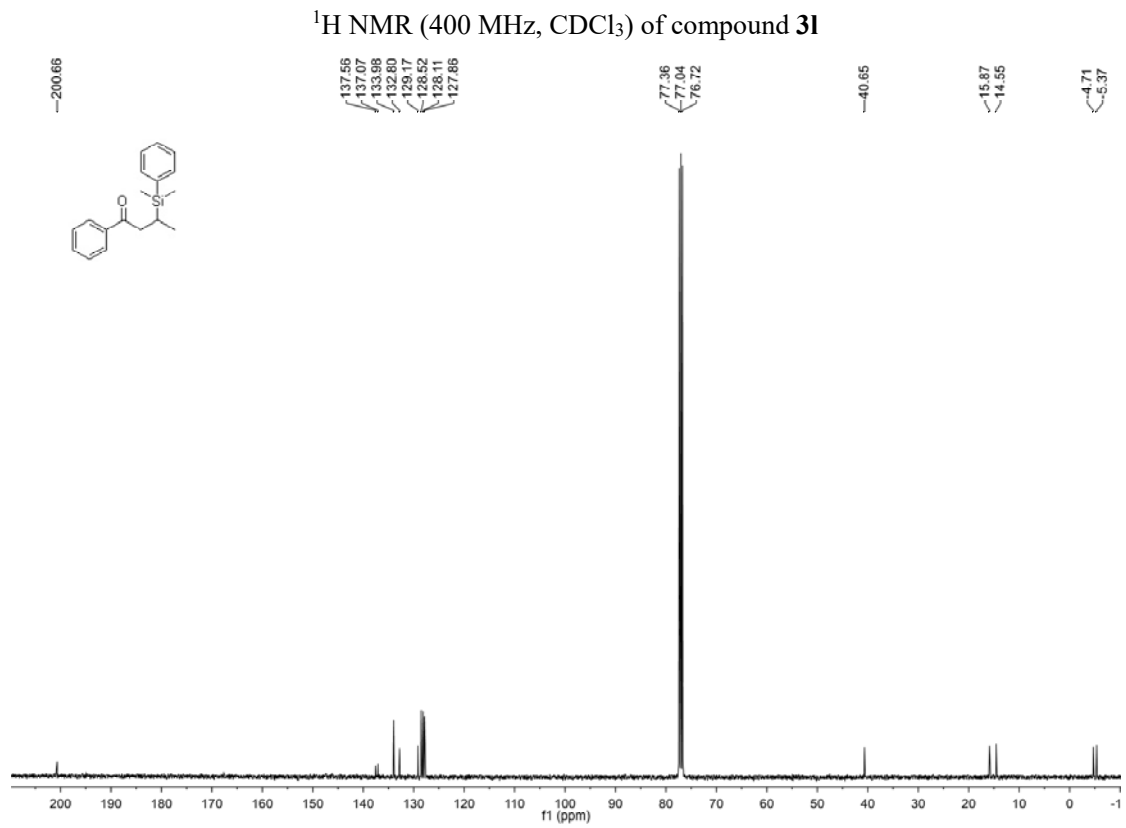

$^{13}\text{C}\{^1\text{H}\}$  NMR (100 MHz,  $\text{CDCl}_3$ ) of compound **31**

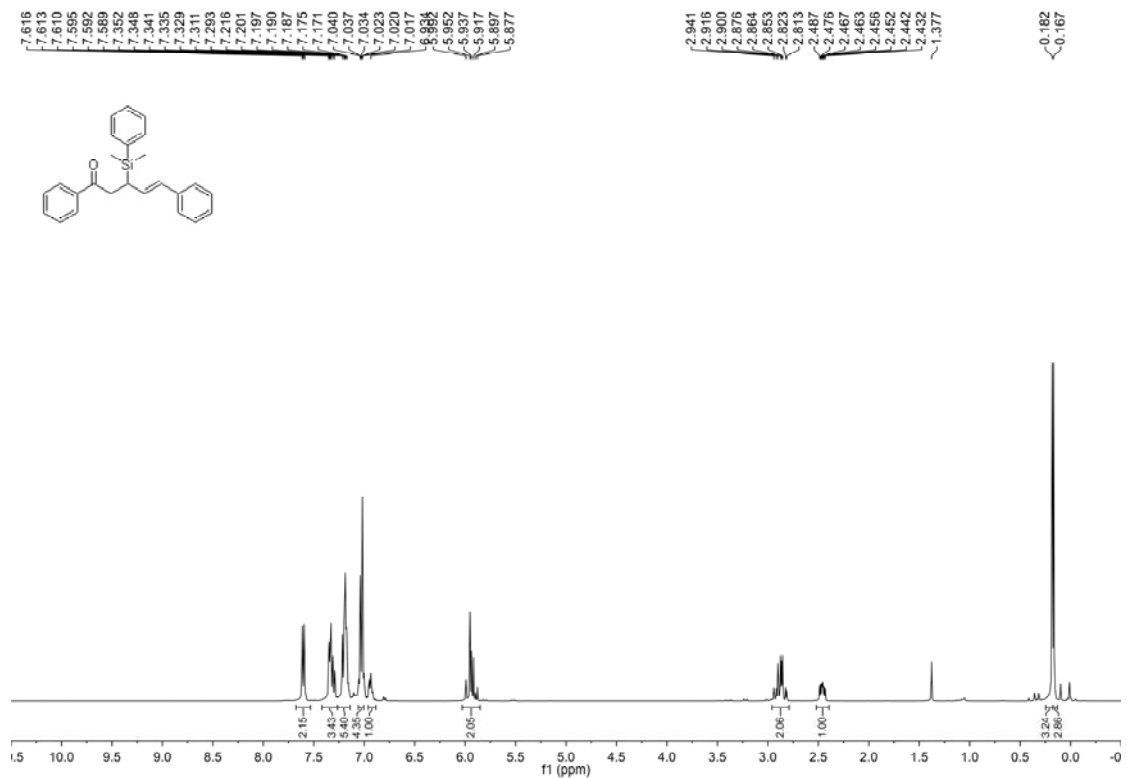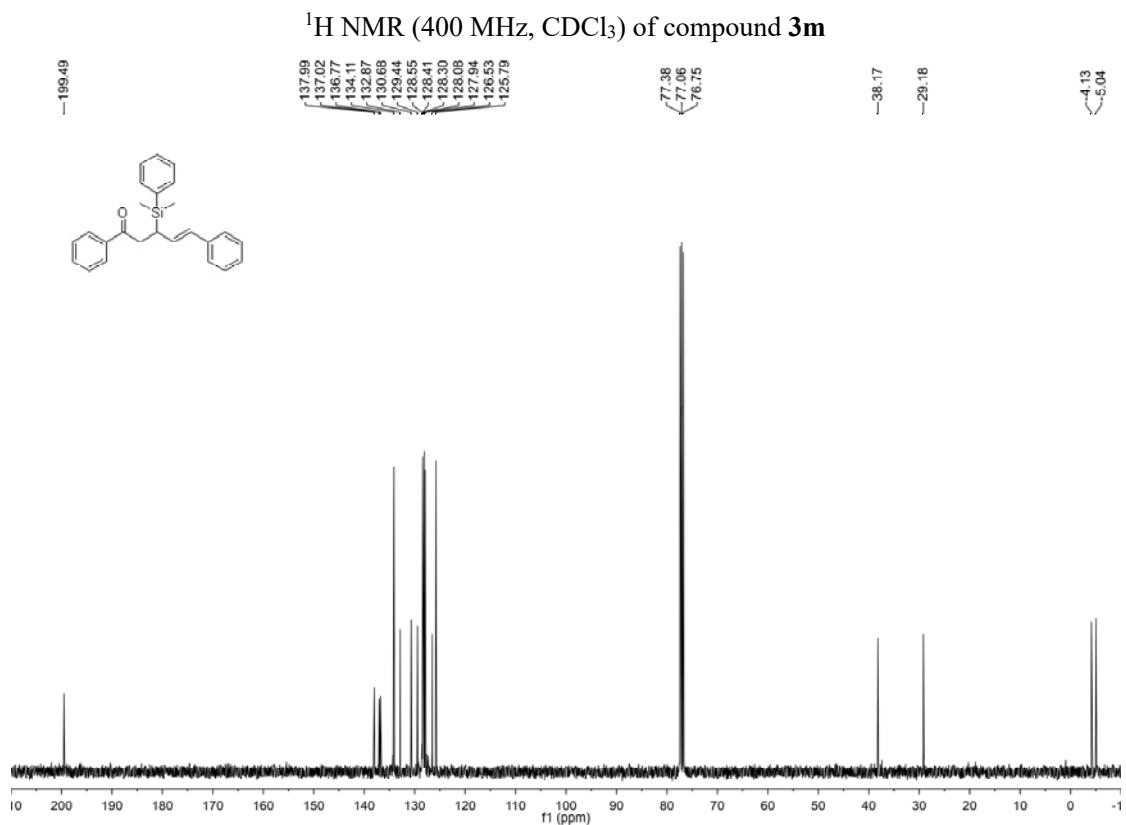

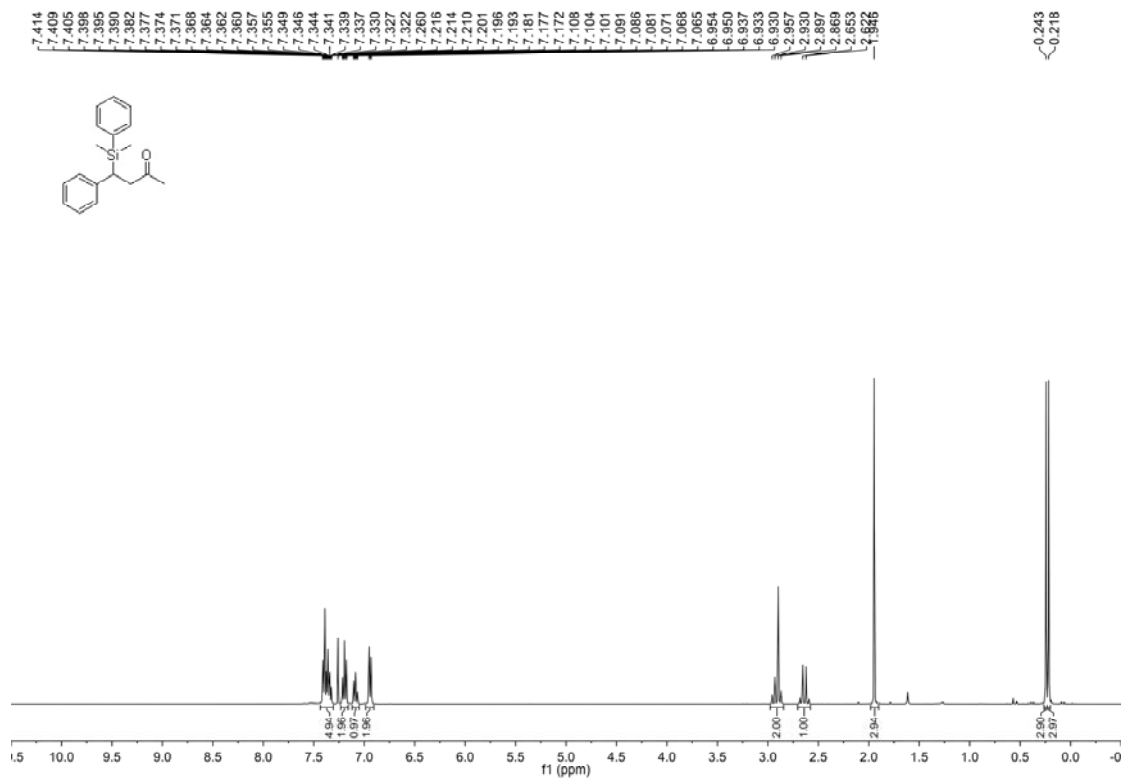

$^1\text{H}$  NMR (400 MHz,  $\text{CDCl}_3$ ) of compound **3n**

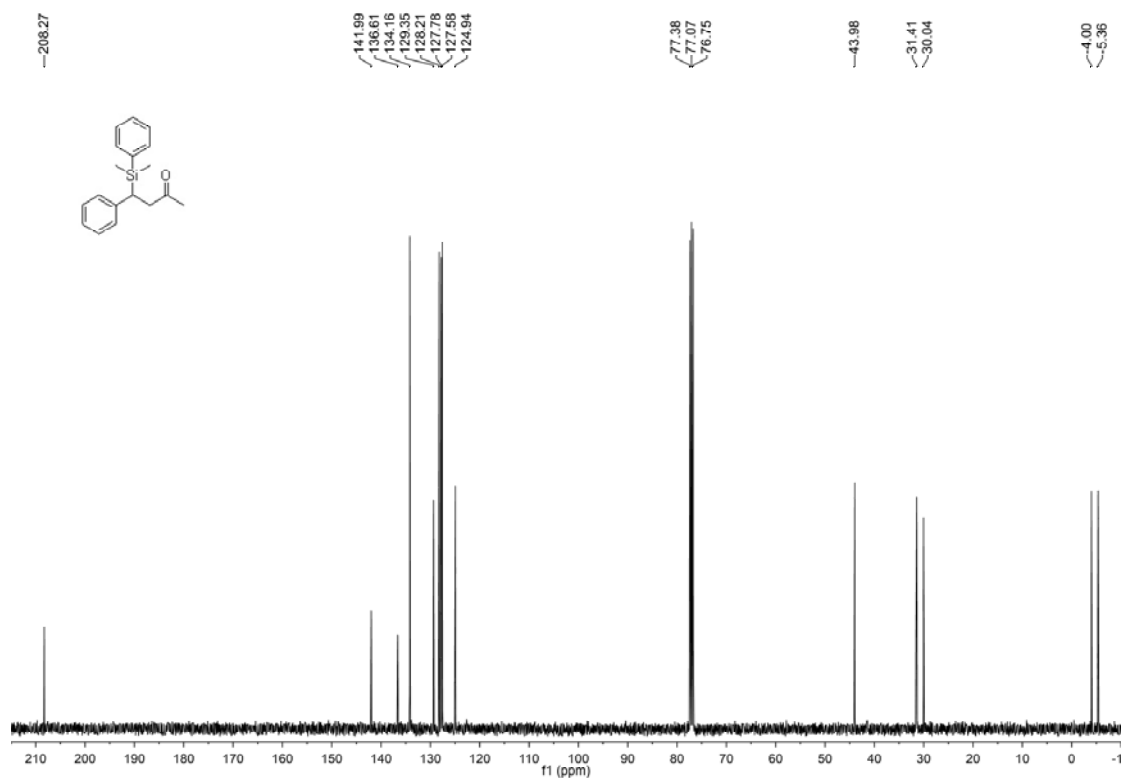

$^{13}\text{C}\{^1\text{H}\}$  NMR (100 MHz,  $\text{CDCl}_3$ ) of compound **3n**

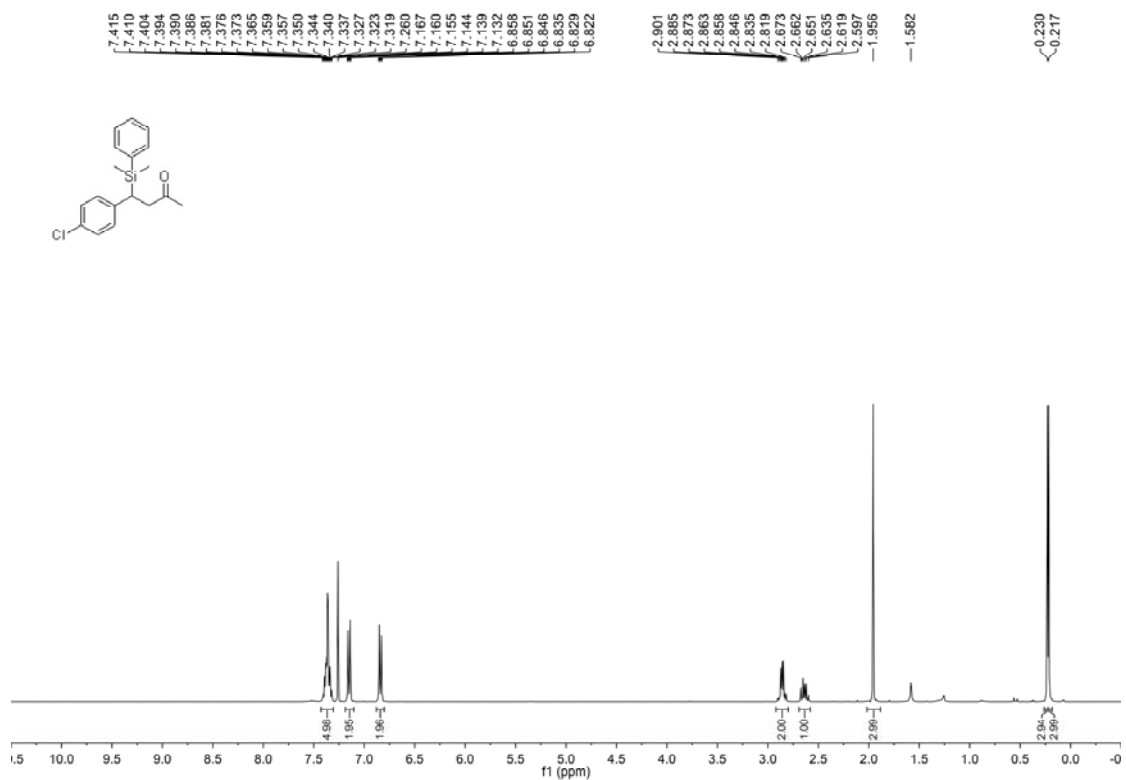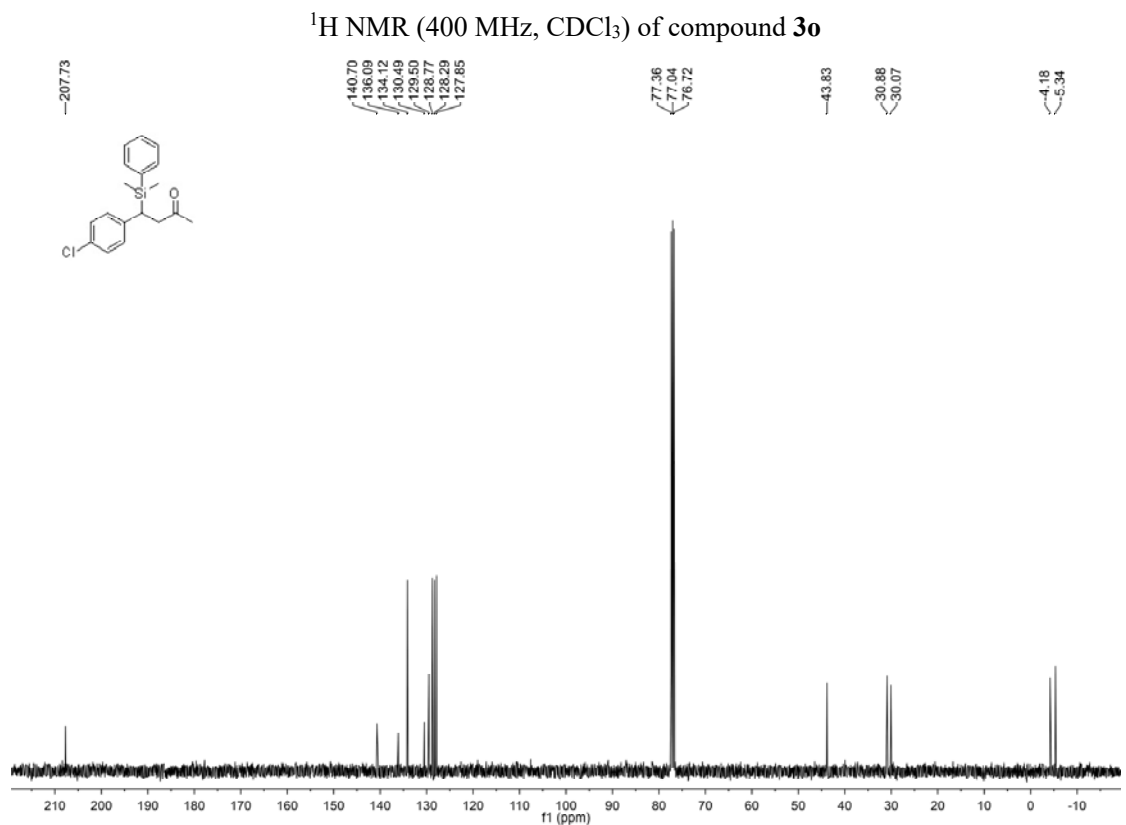

$^{13}\text{C}\{^1\text{H}\}$  NMR (100 MHz,  $\text{CDCl}_3$ ) of compound **3o**

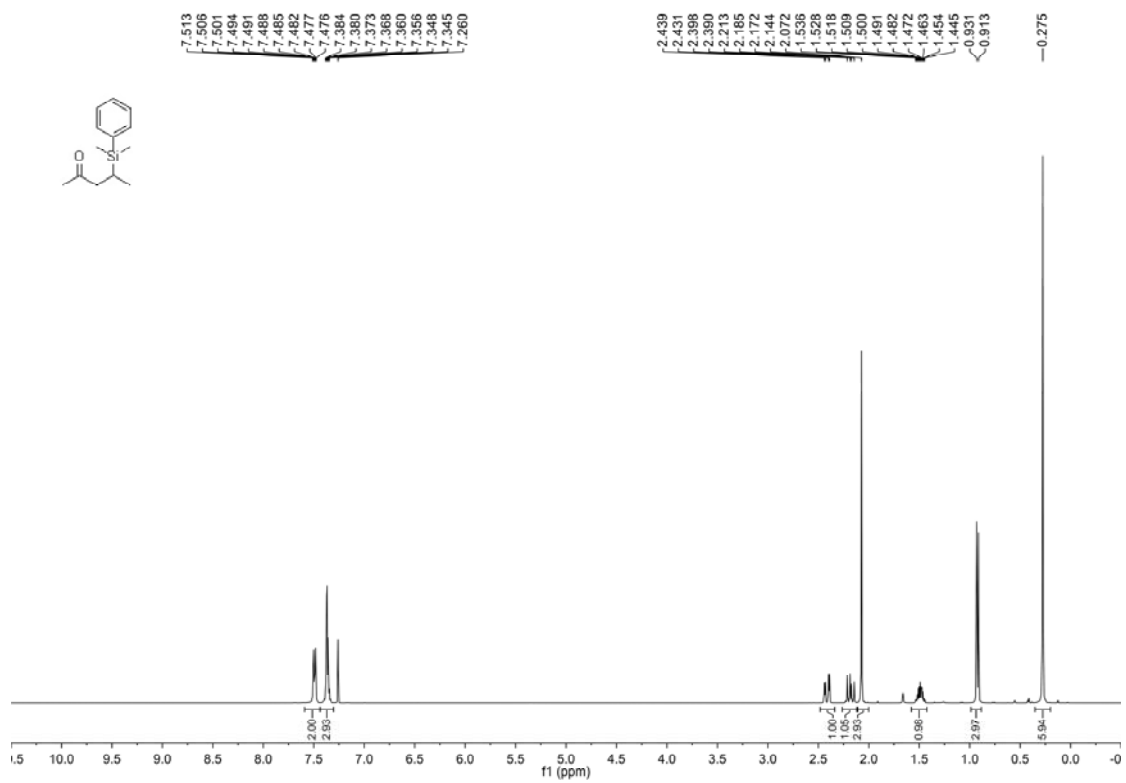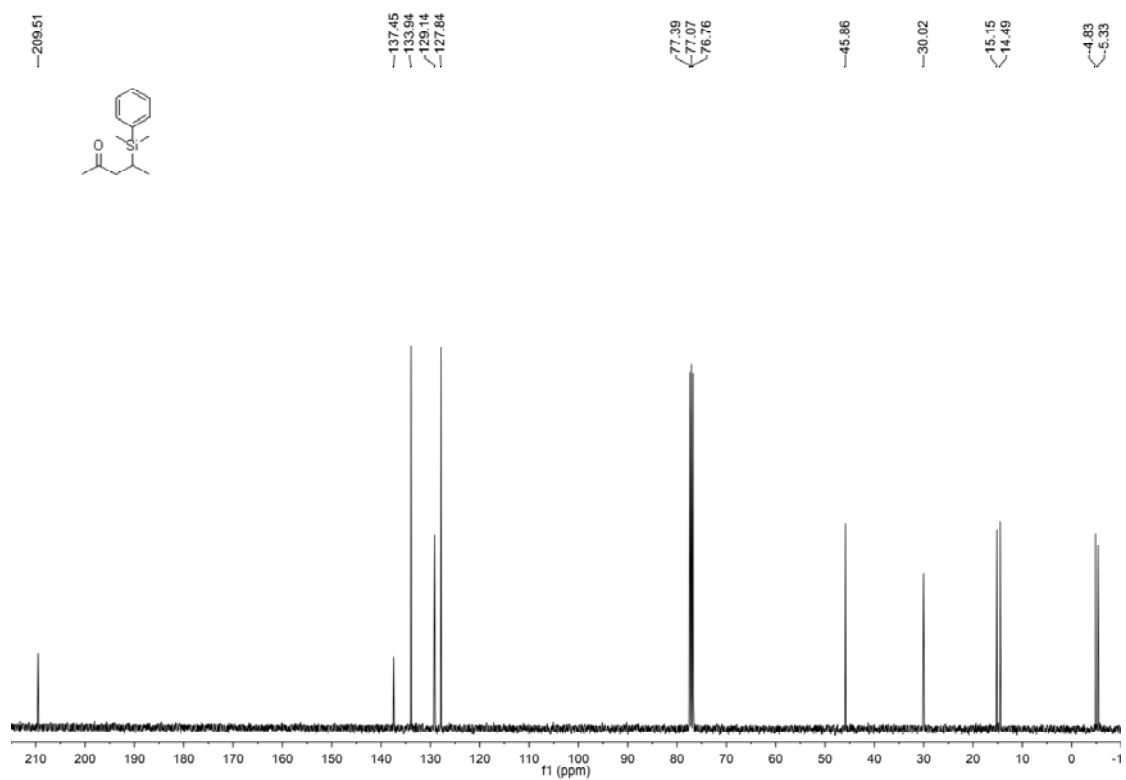

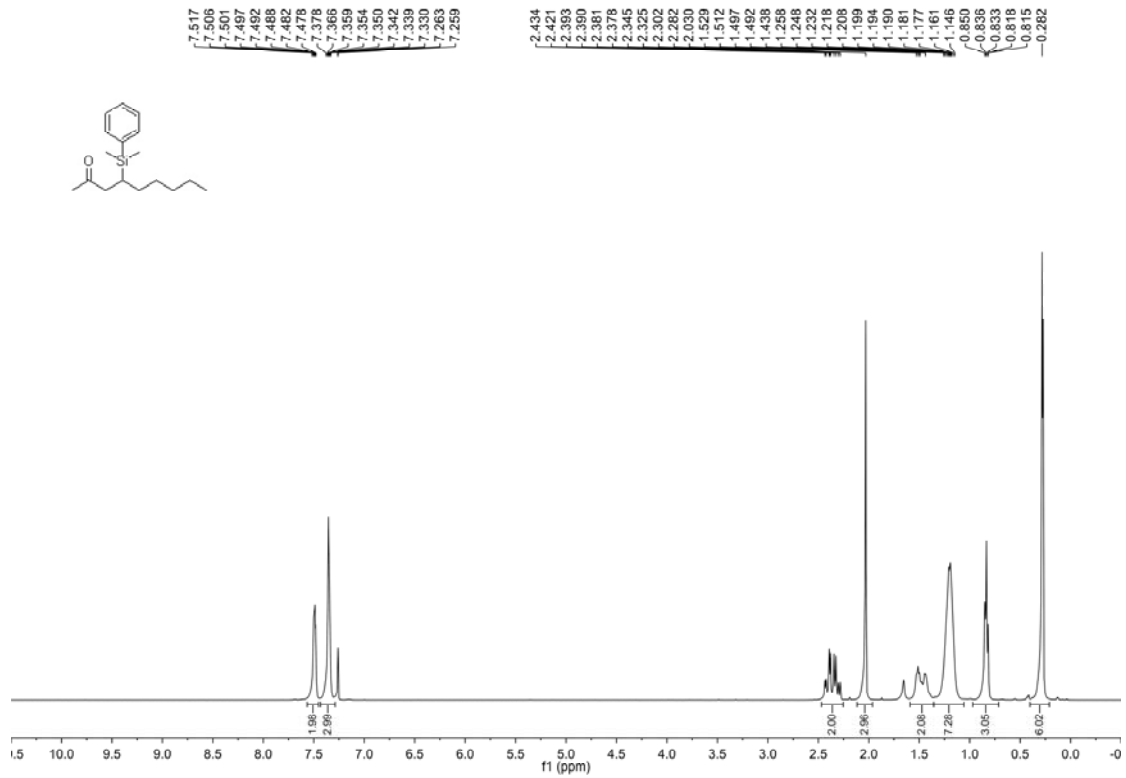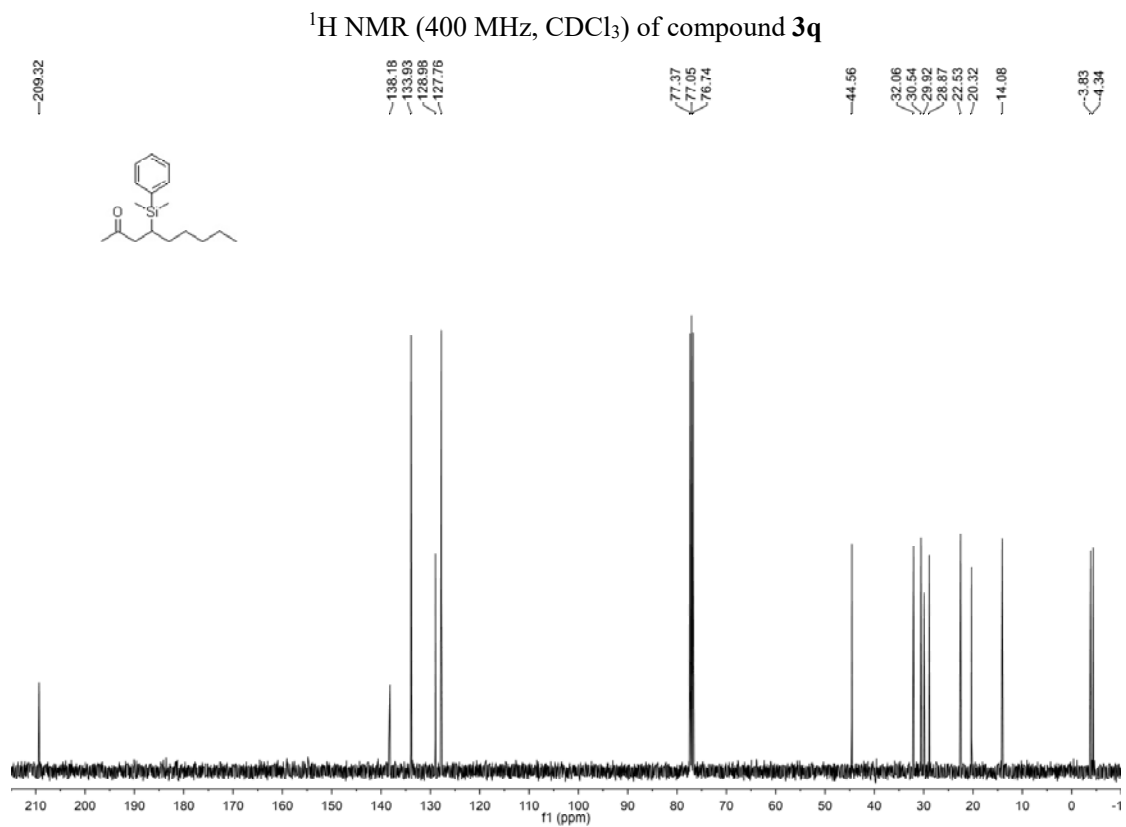

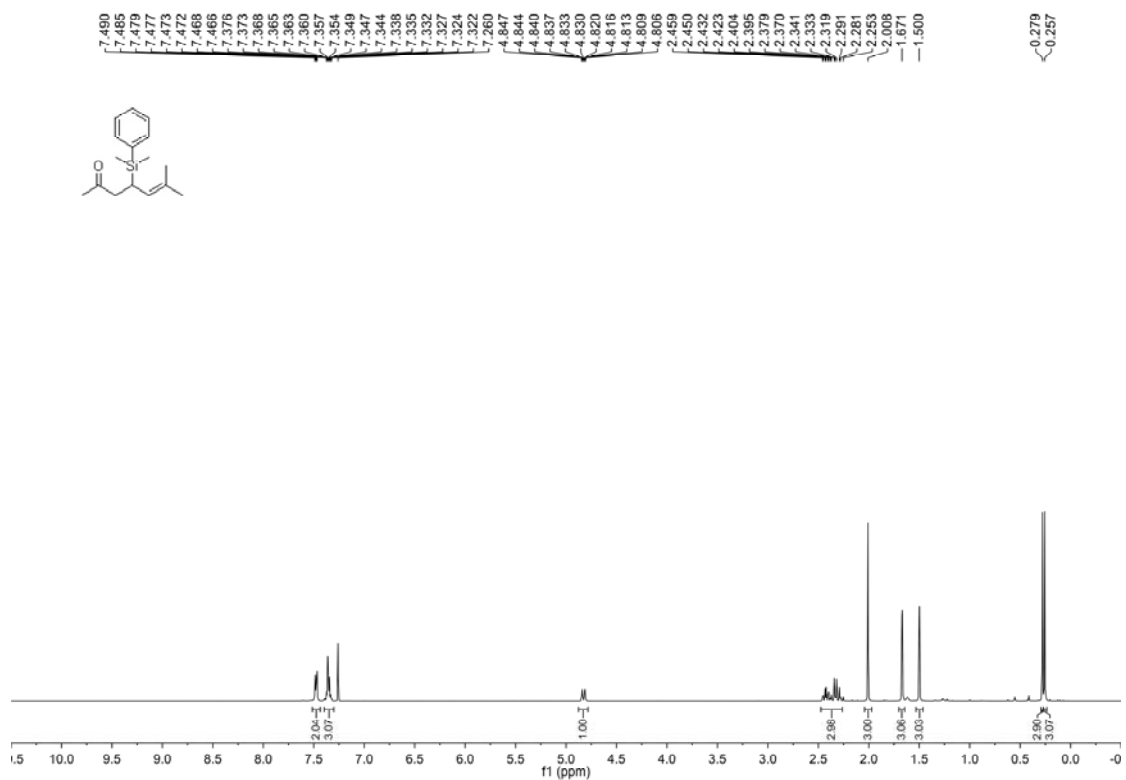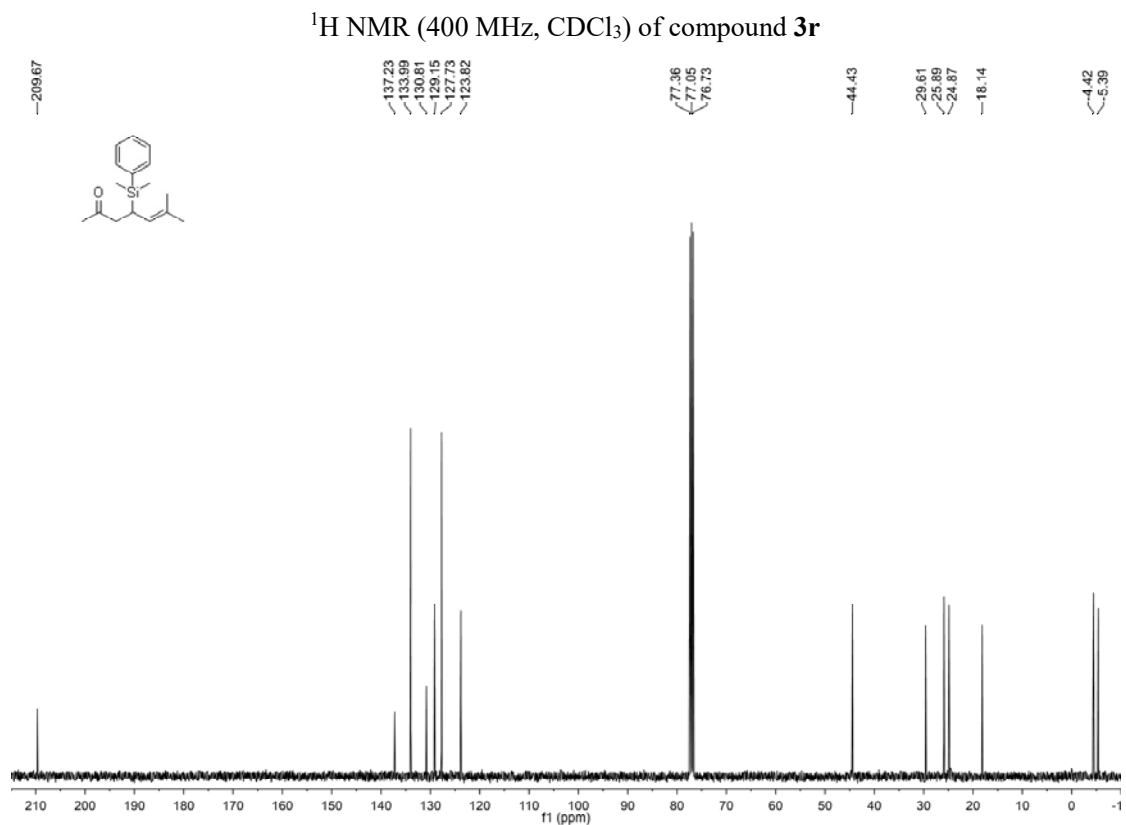

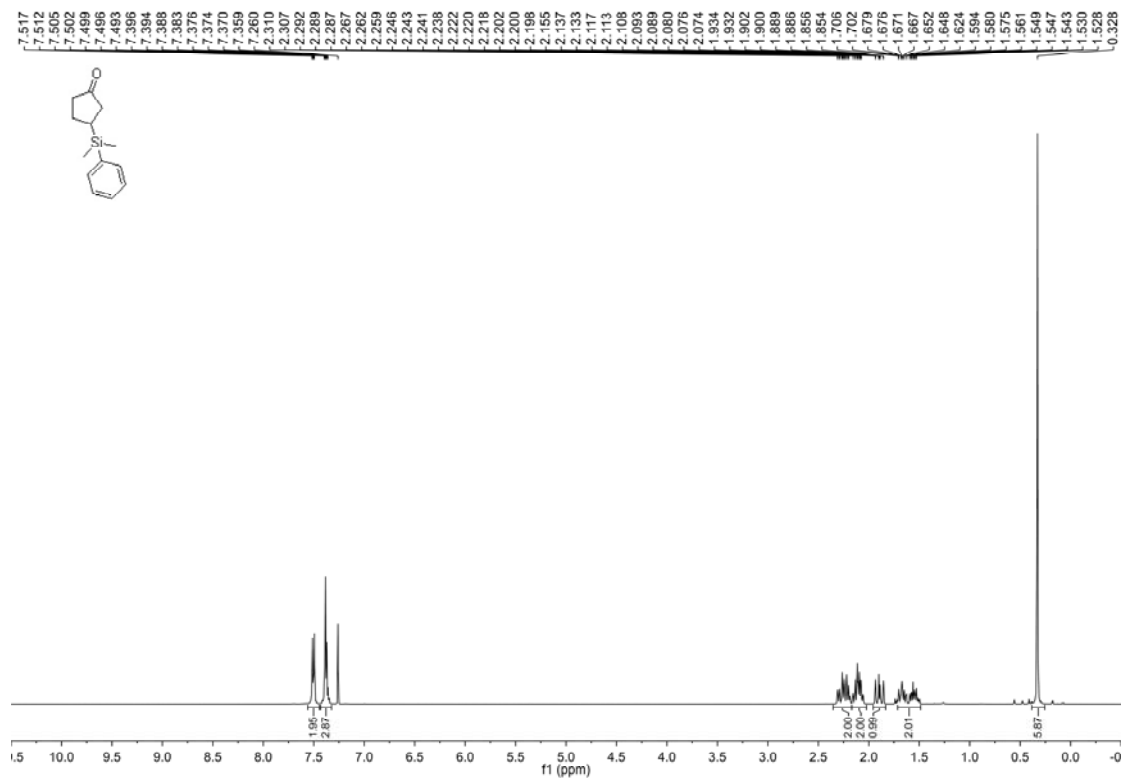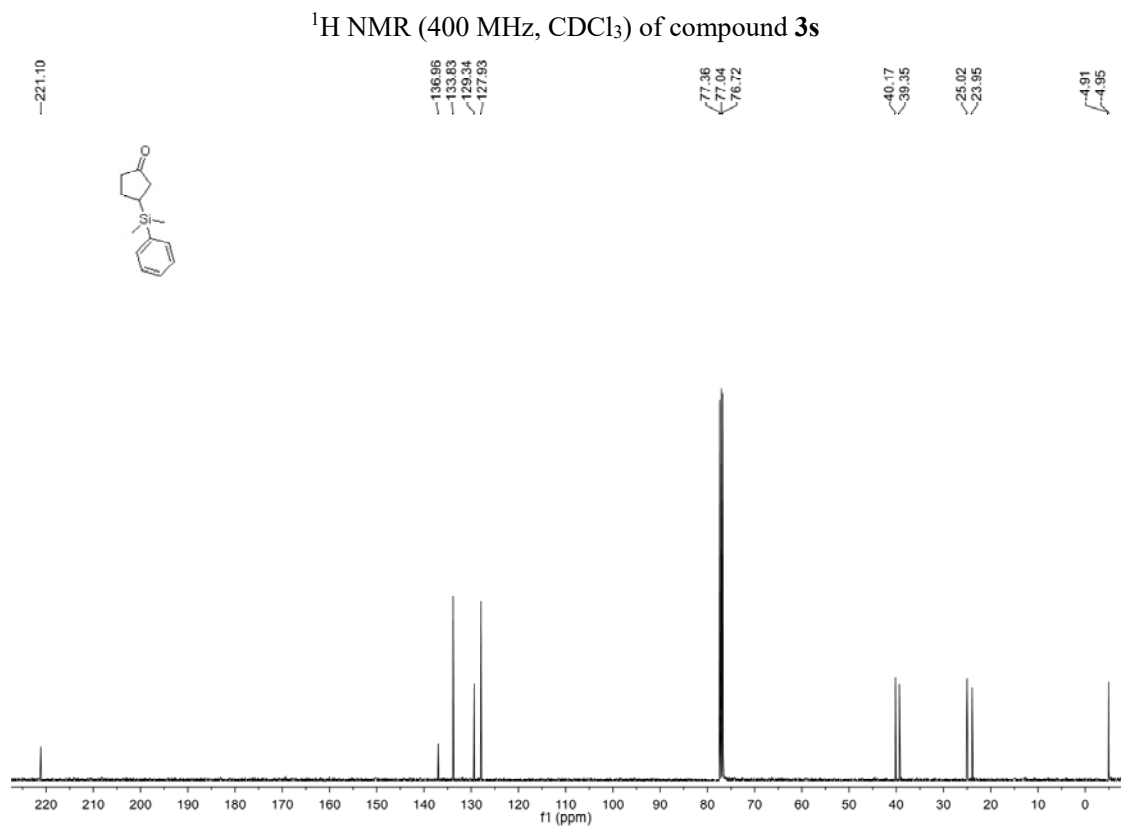



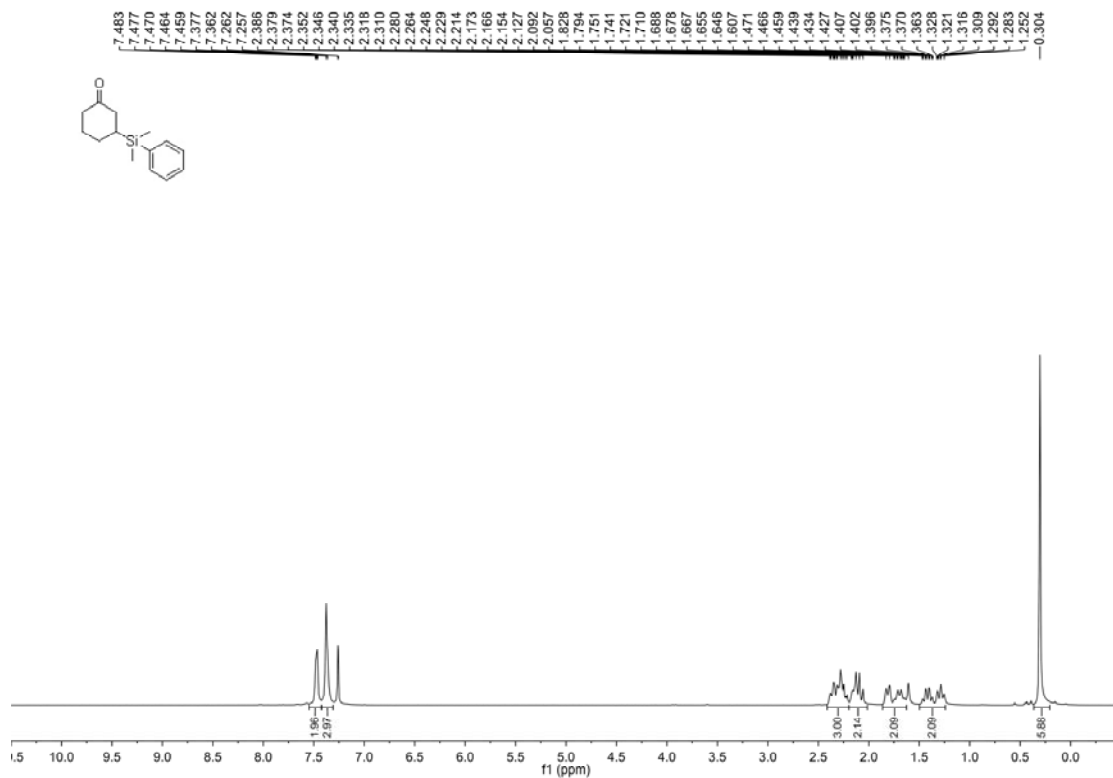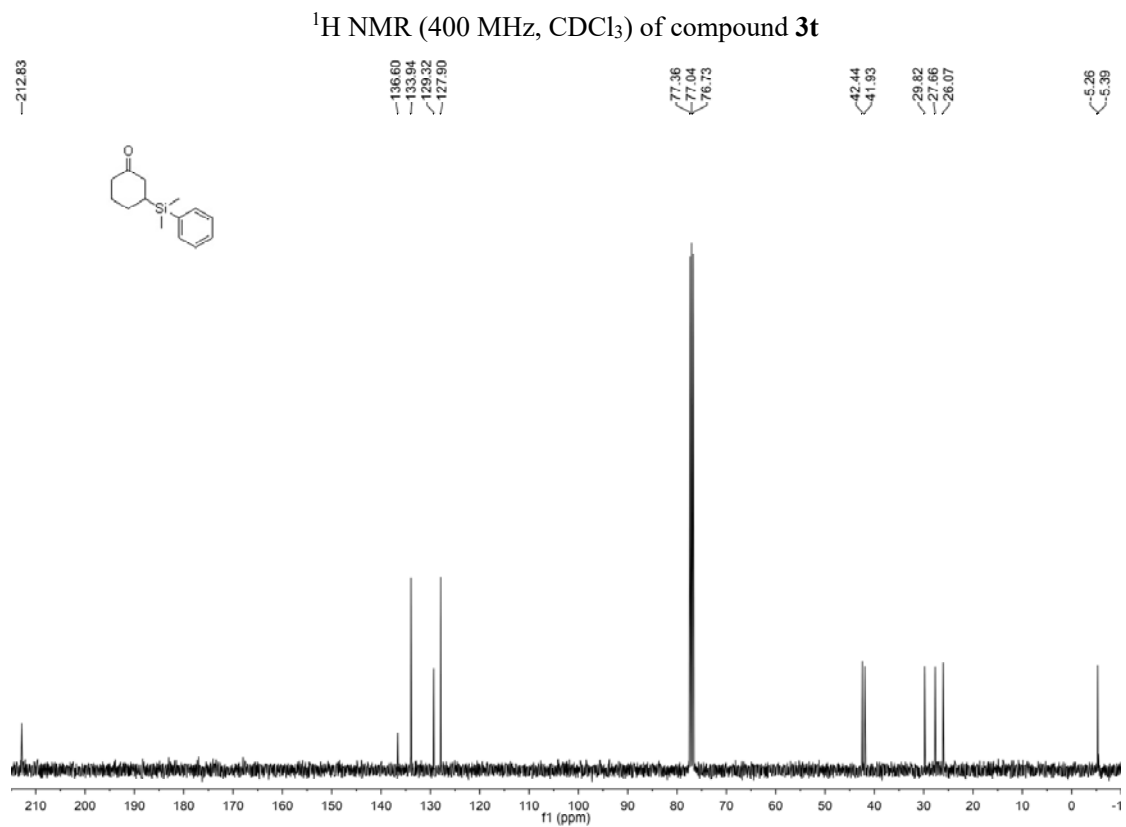

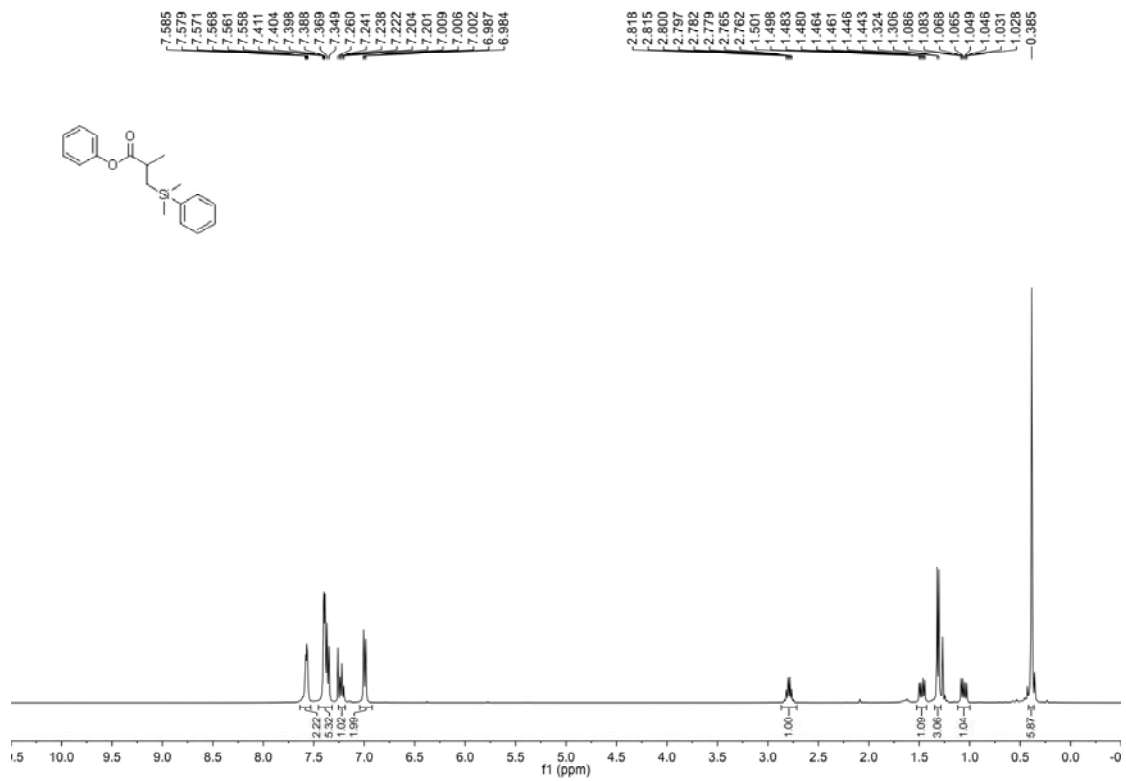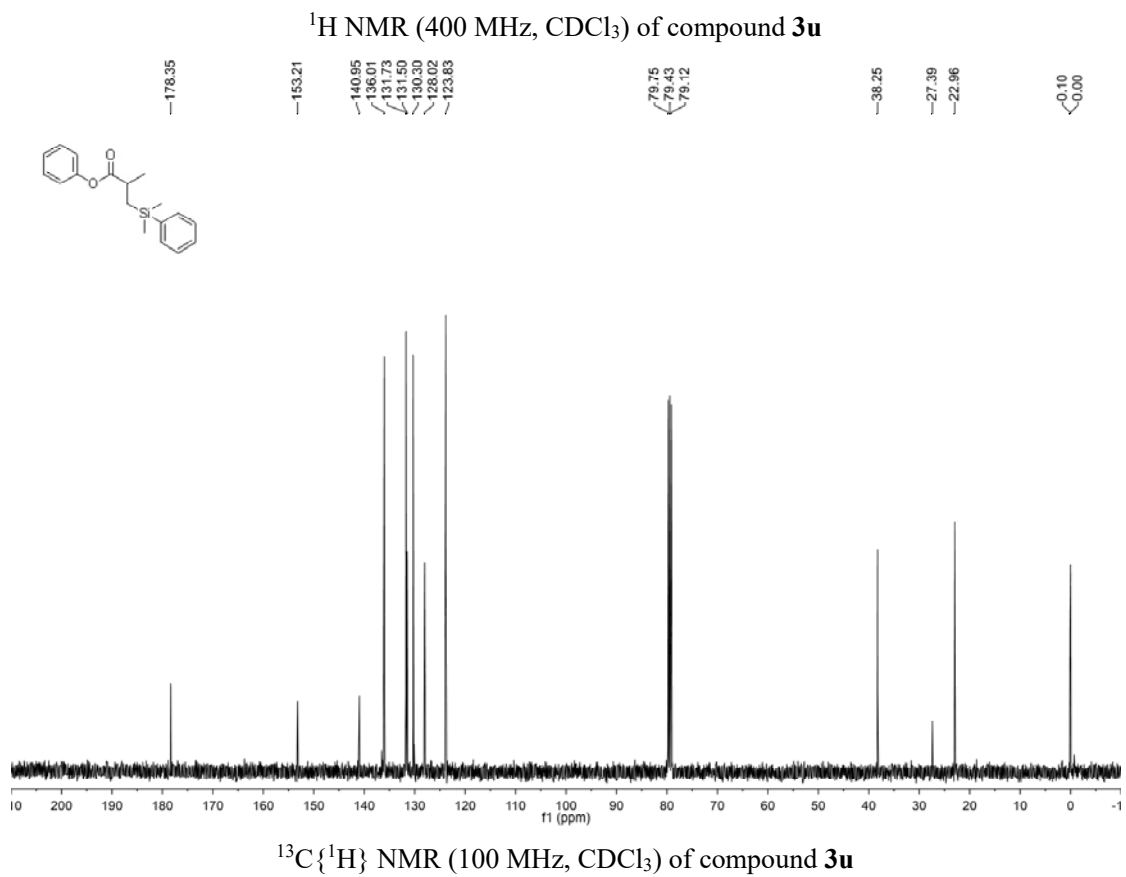

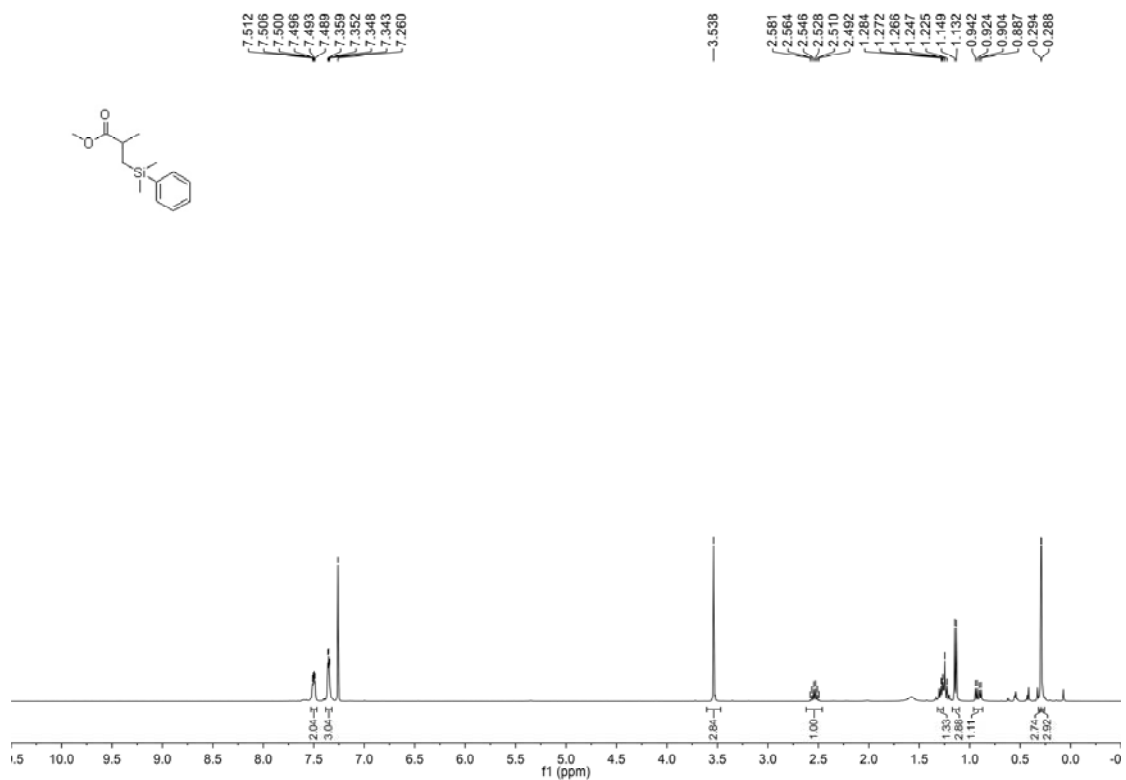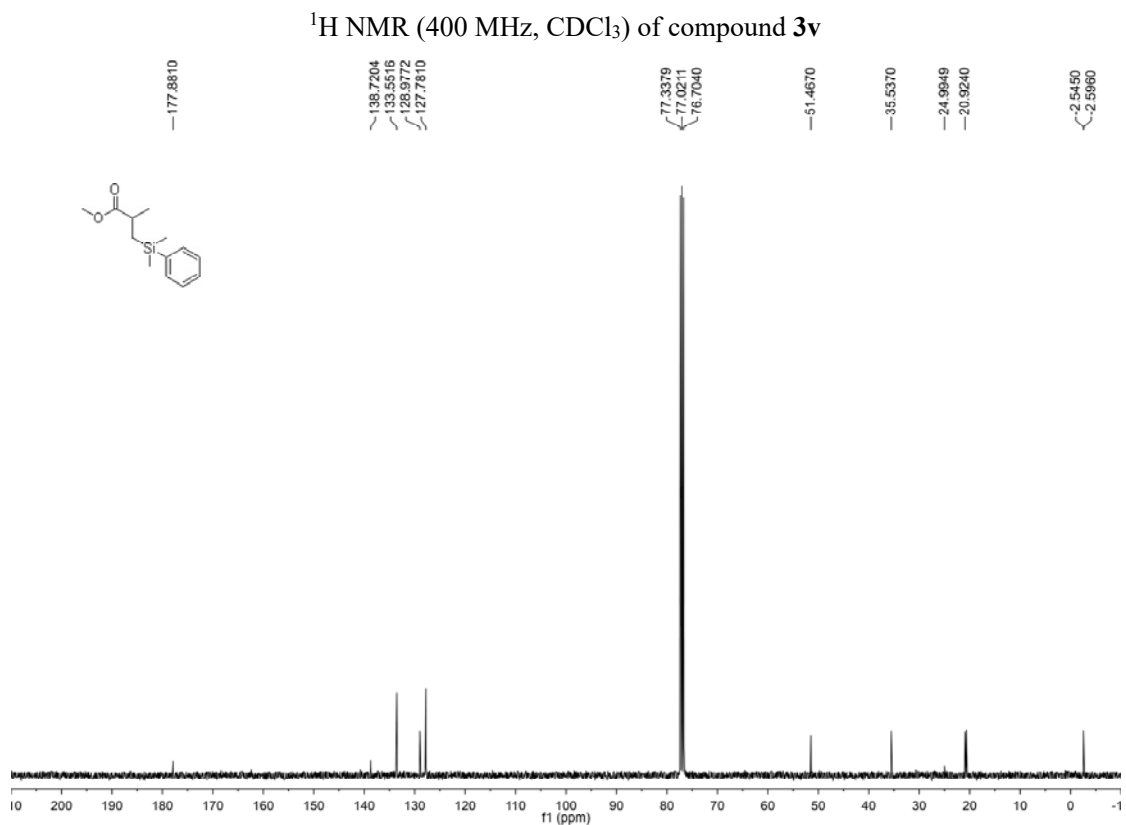

7.519  
7.512  
7.507  
7.506  
7.503  
7.499  
7.495  
7.372  
7.363  
7.356  
7.352  
7.347  
7.341  
7.261  
4.282  
4.284  
4.281  
4.234  
4.227  
4.204  
4.196  
3.799  
3.783  
3.768  
3.755  
3.752  
3.740  
3.725  
3.709  
3.139  
3.132  
3.129  
3.122  
2.831  
2.820  
2.819  
2.808  
2.613  
2.609  
2.605  
2.601  
2.595  
2.594  
2.584  
2.580  
2.583  
2.573  
2.570  
1.329  
1.321  
1.310  
1.292  
1.284  
1.273  
1.265  
1.168  
1.150  
0.963  
0.962  
0.944  
0.926  
0.925  
0.907  
0.319  
0.310  
0.306  
0.289  
0.281

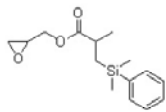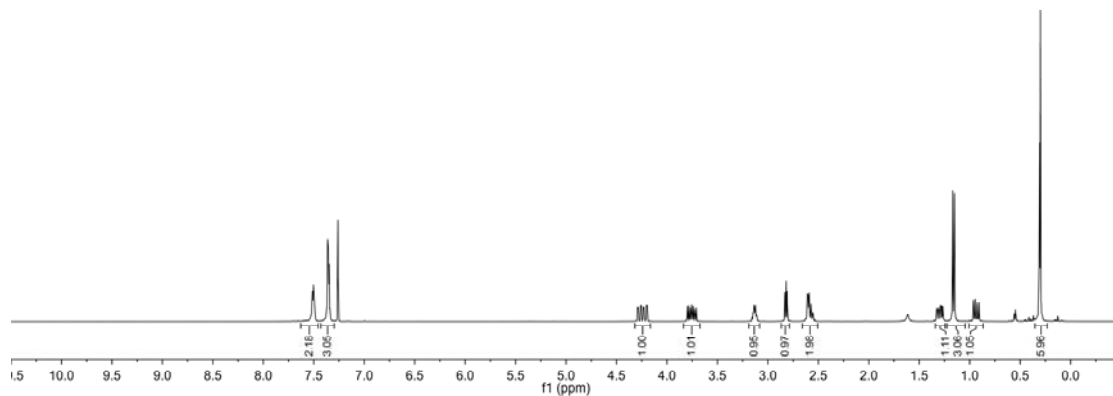

$^1\text{H}$  NMR (400 MHz,  $\text{CDCl}_3$ ) of compound **3w**

-179.62  
141.00  
136.01  
131.46  
130.24  
79.79  
79.47  
79.15  
-67.30  
-51.79  
-47.06  
-37.96  
-23.17  
0.00  
-0.13

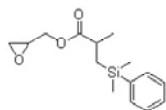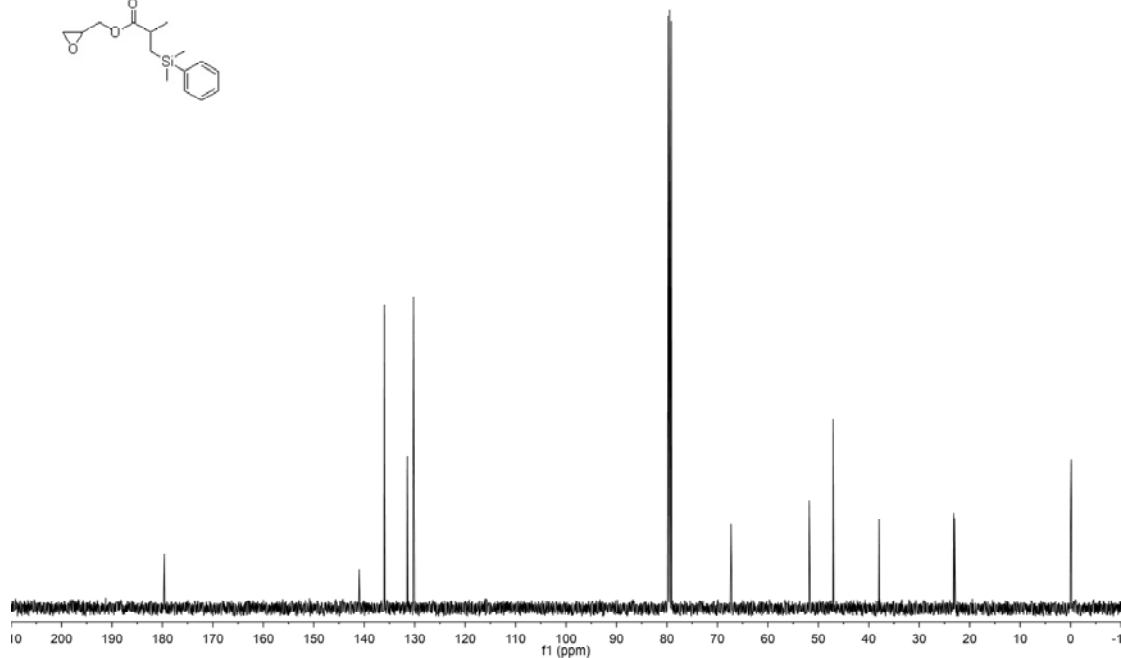

$^{13}\text{C}\{^1\text{H}\}$  NMR (100 MHz,  $\text{CDCl}_3$ ) of compound **3w**

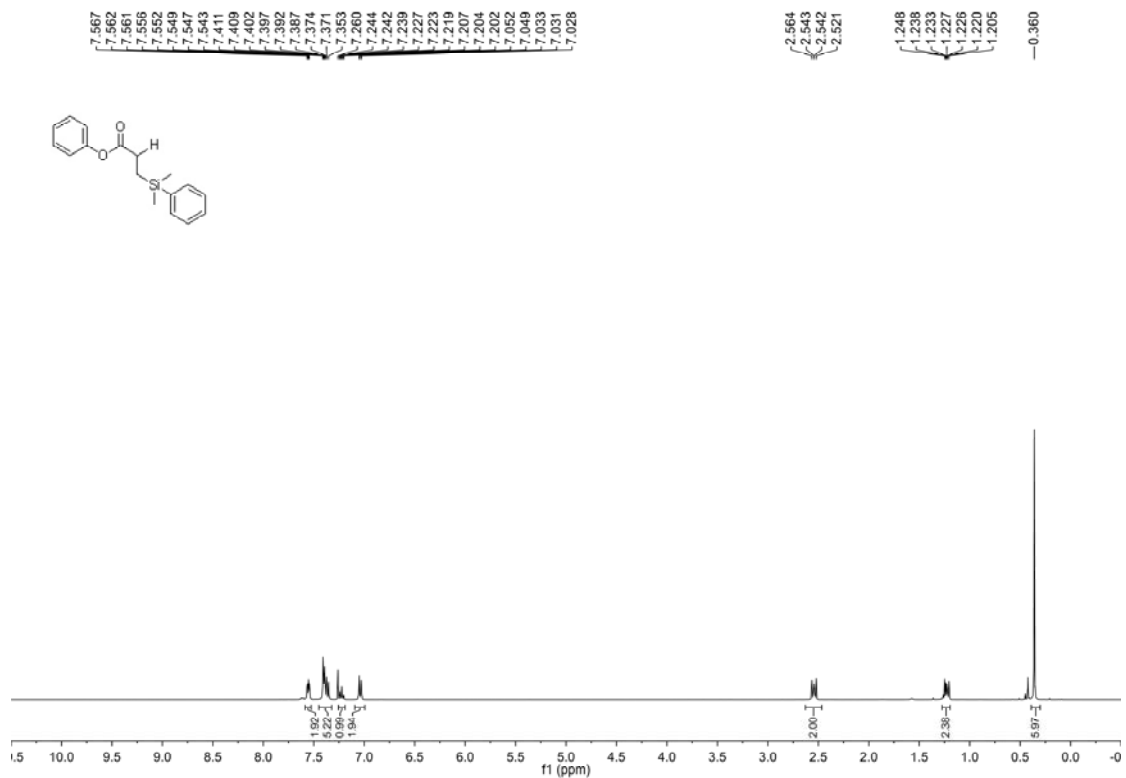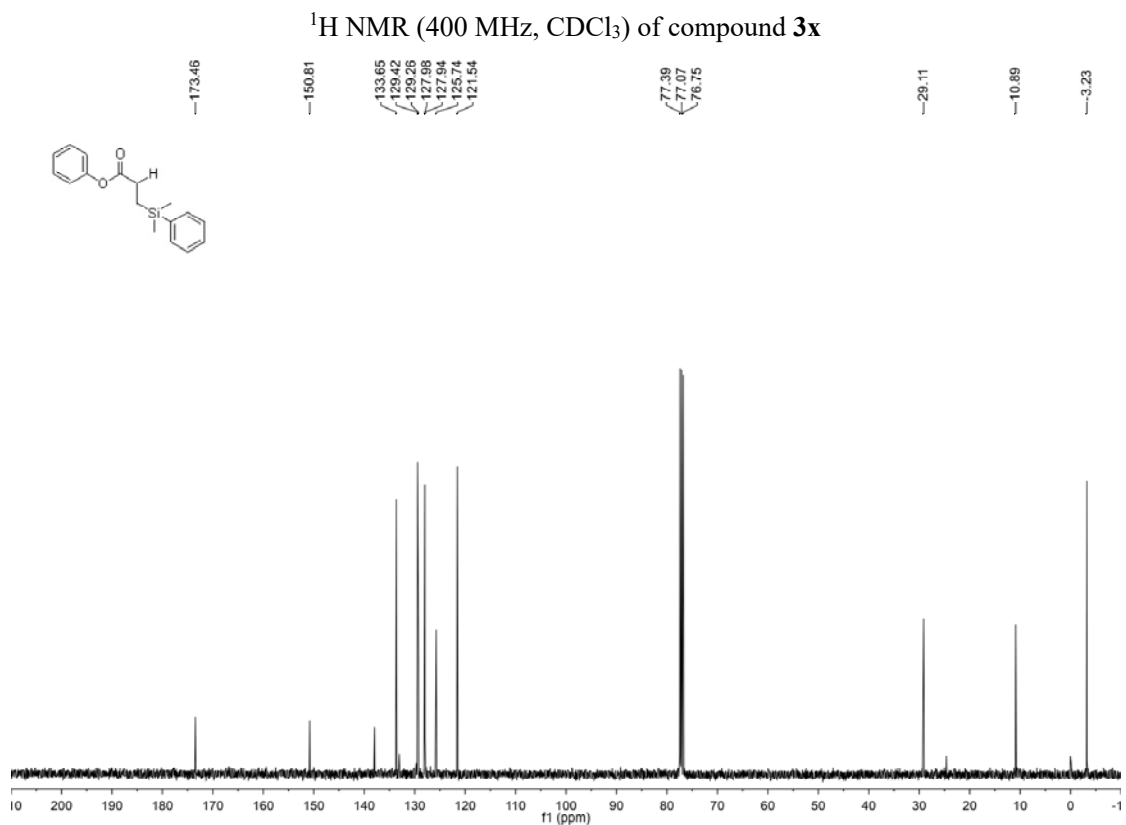

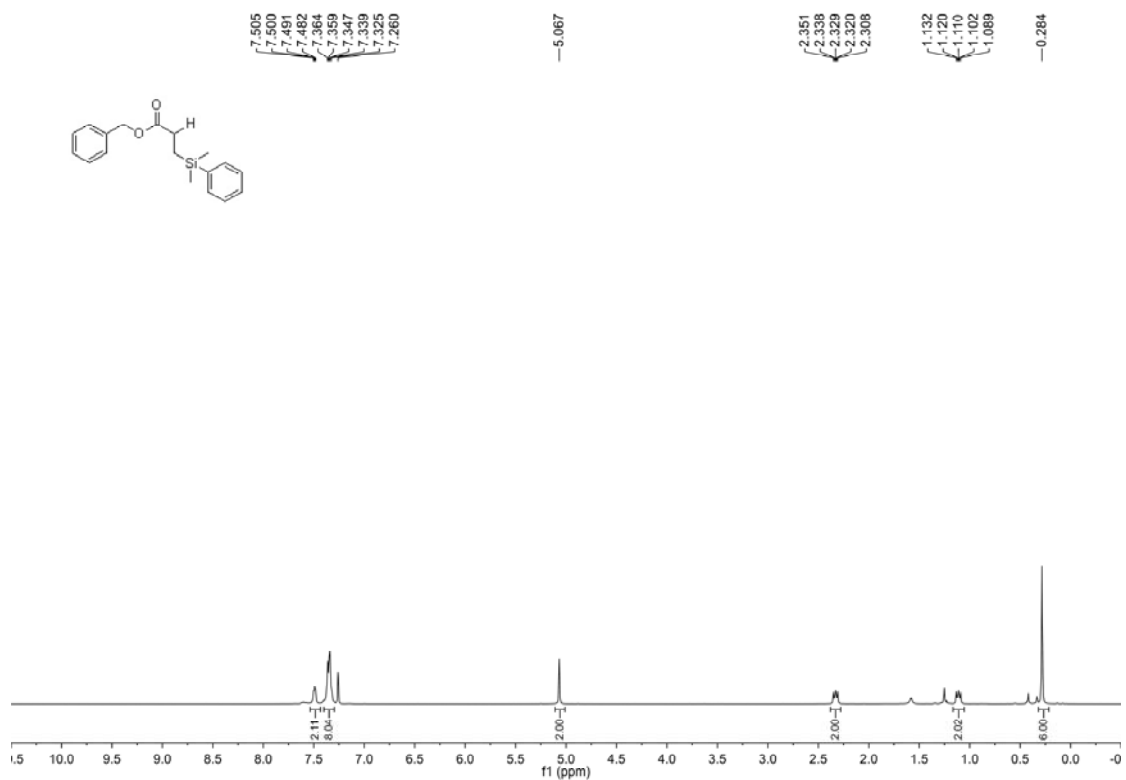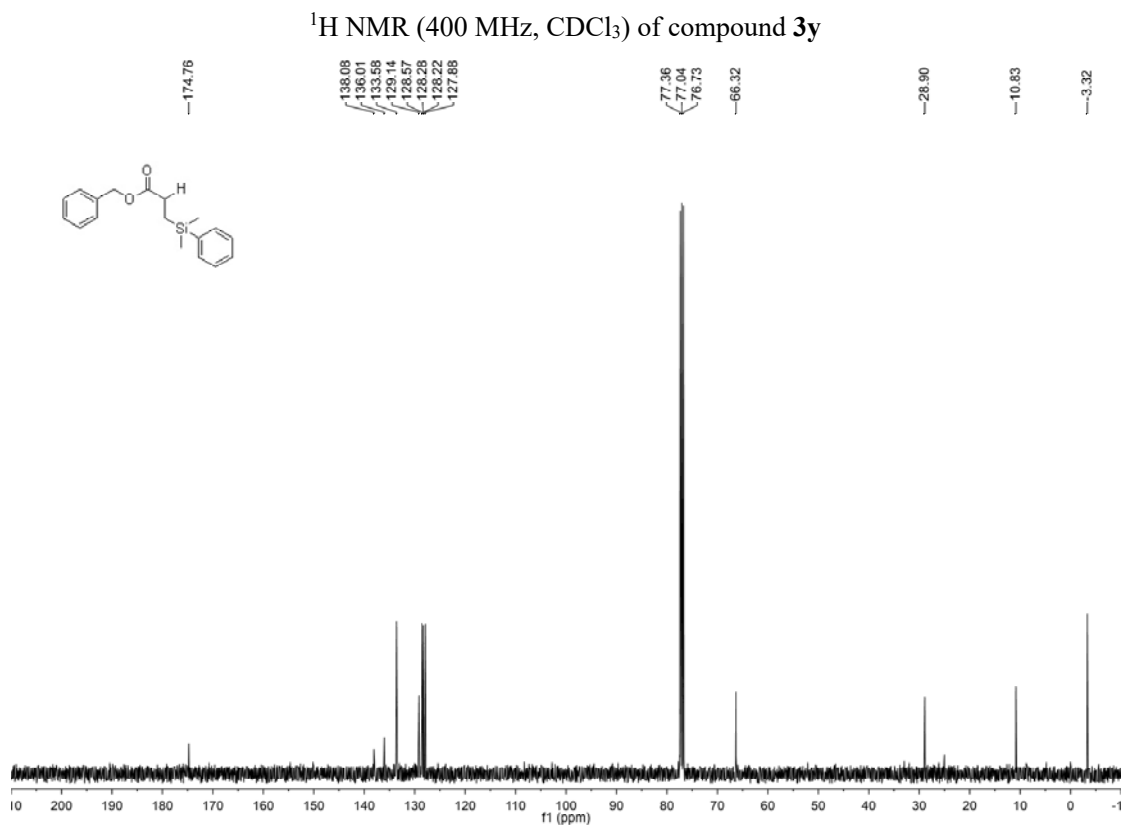

$^{13}\text{C}\{^1\text{H}\}$  NMR (100 MHz,  $\text{CDCl}_3$ ) of compound **3y**

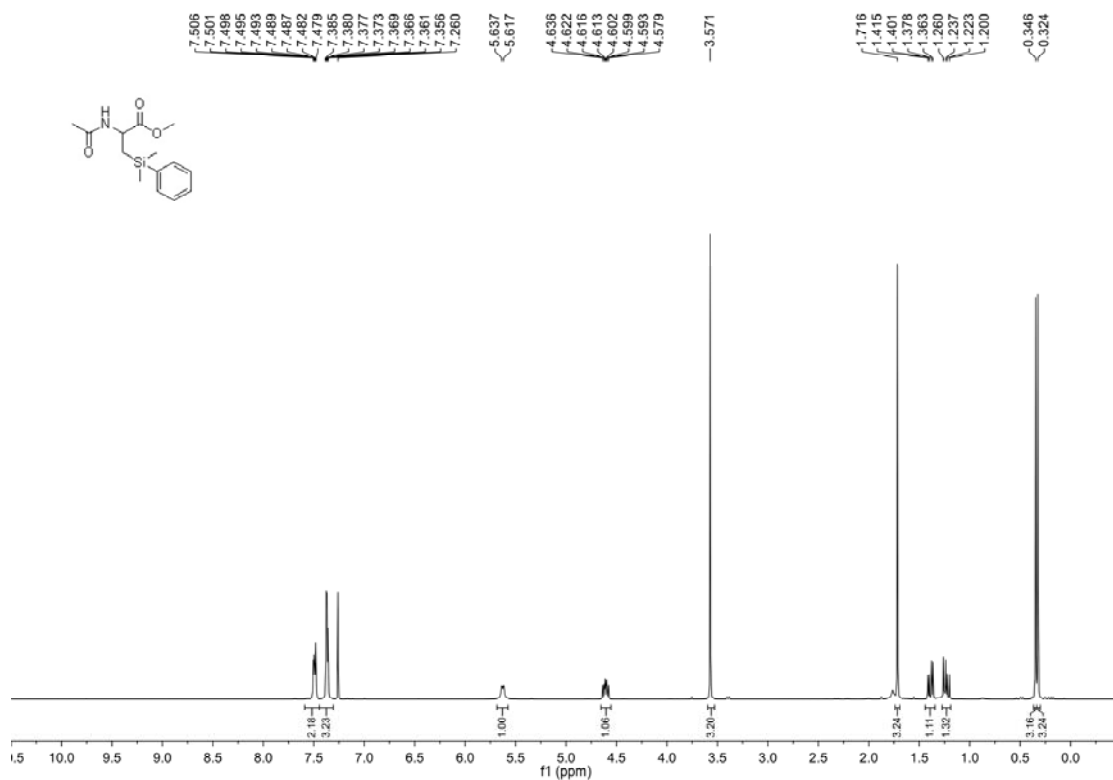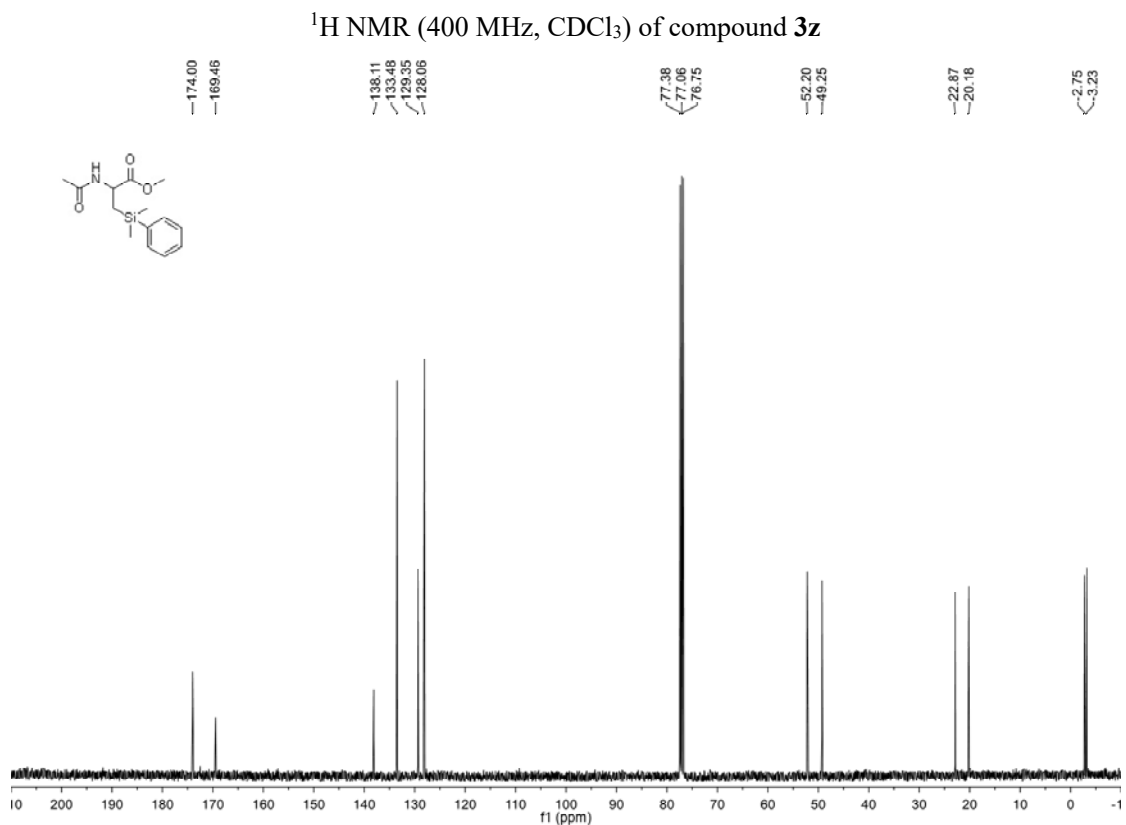

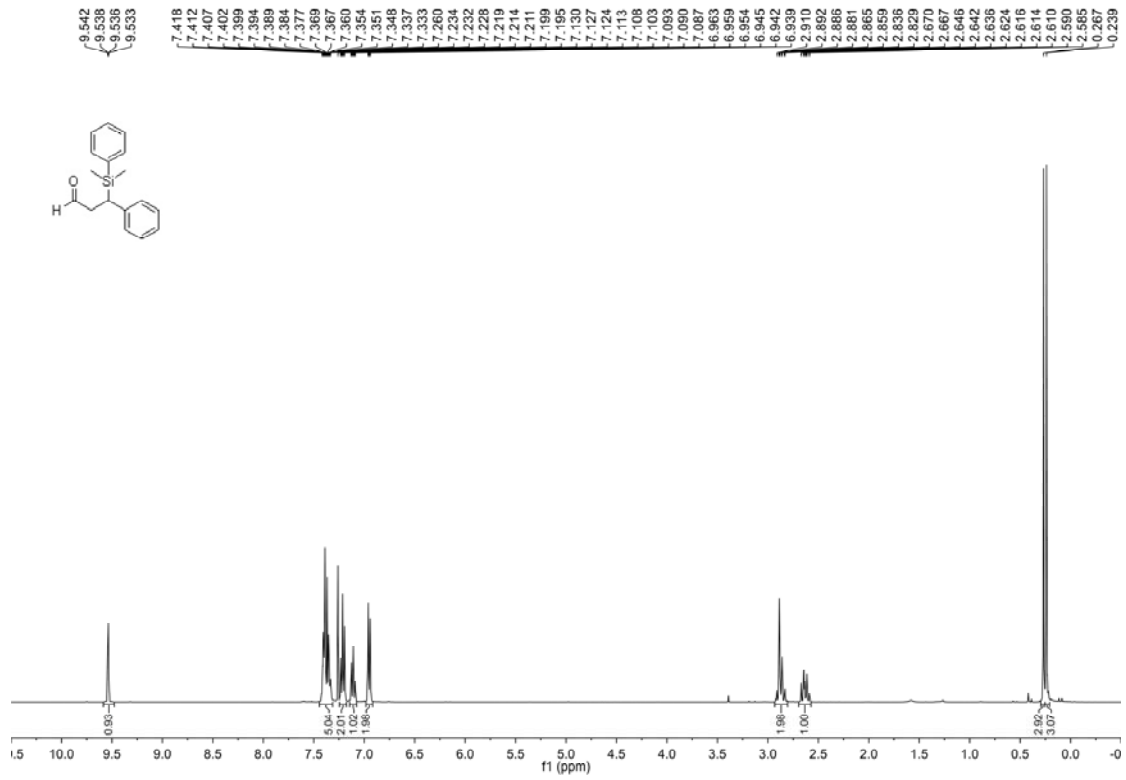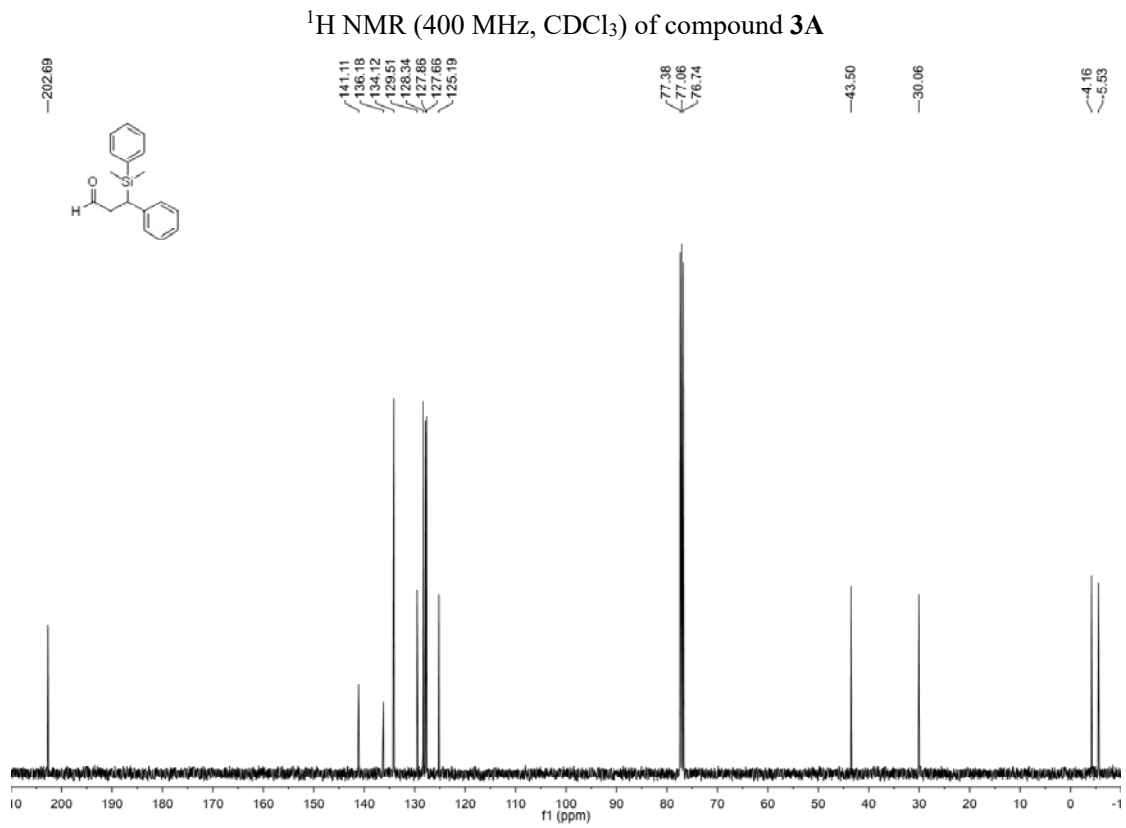



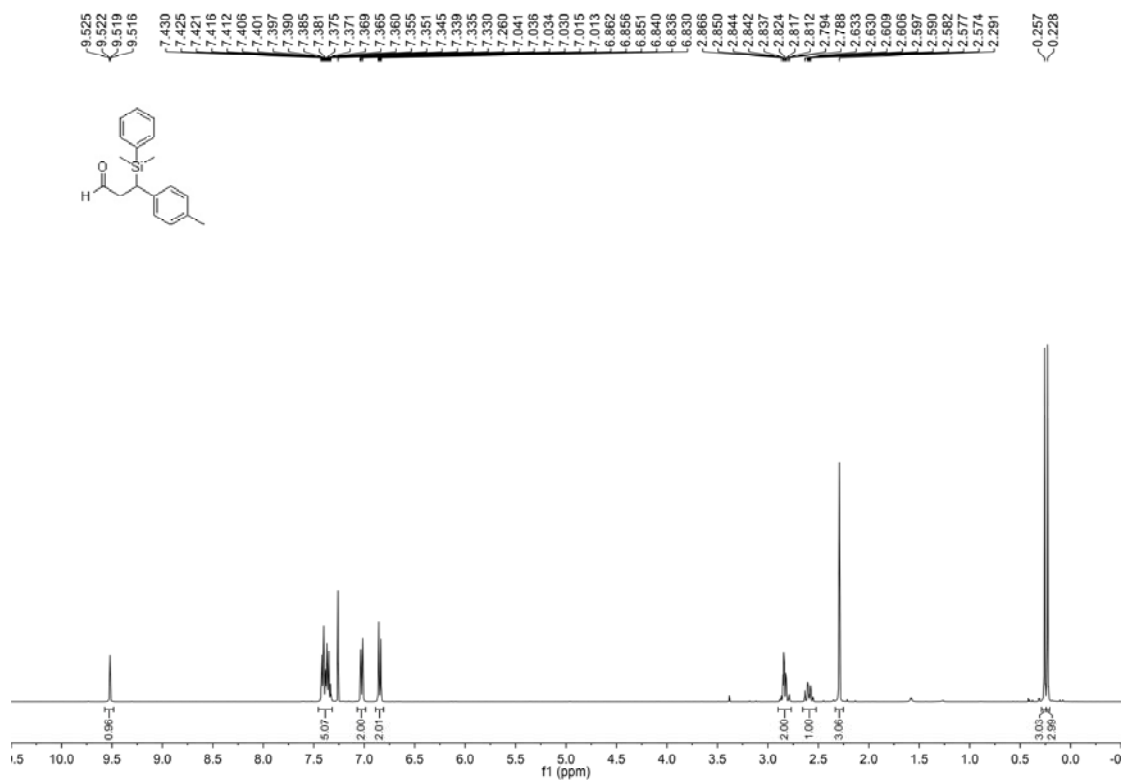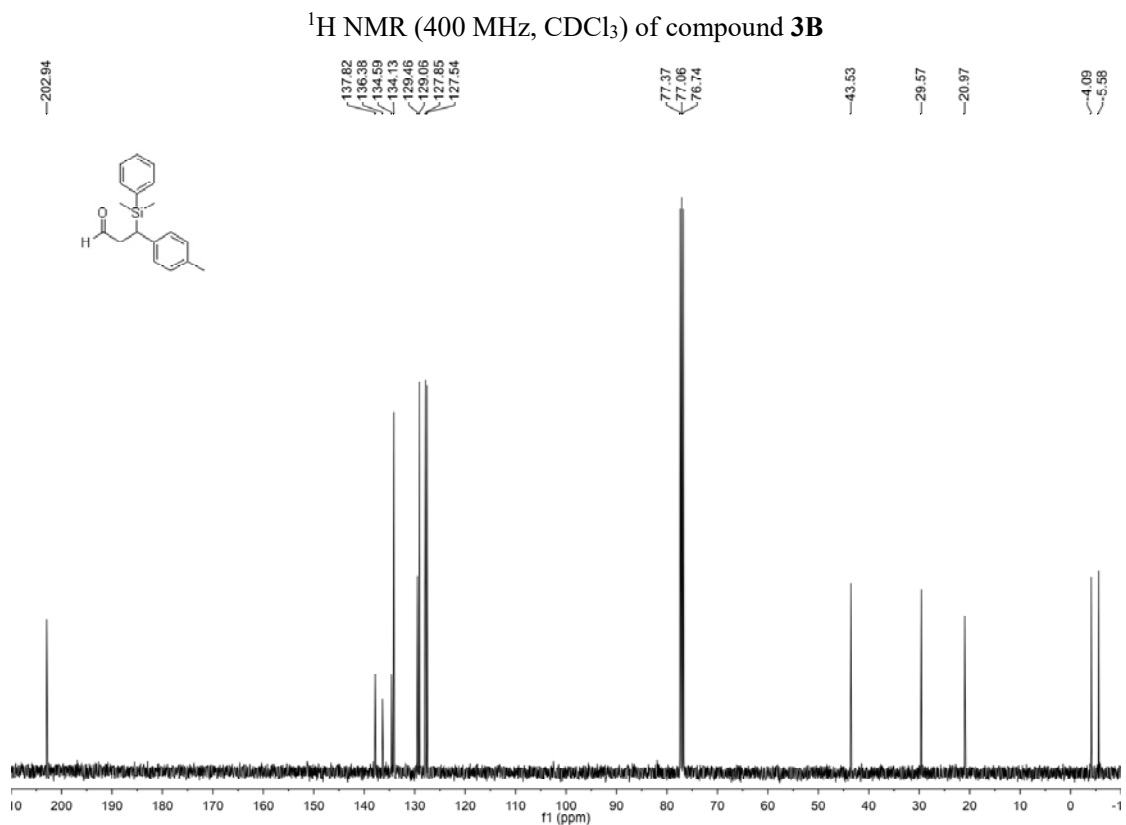

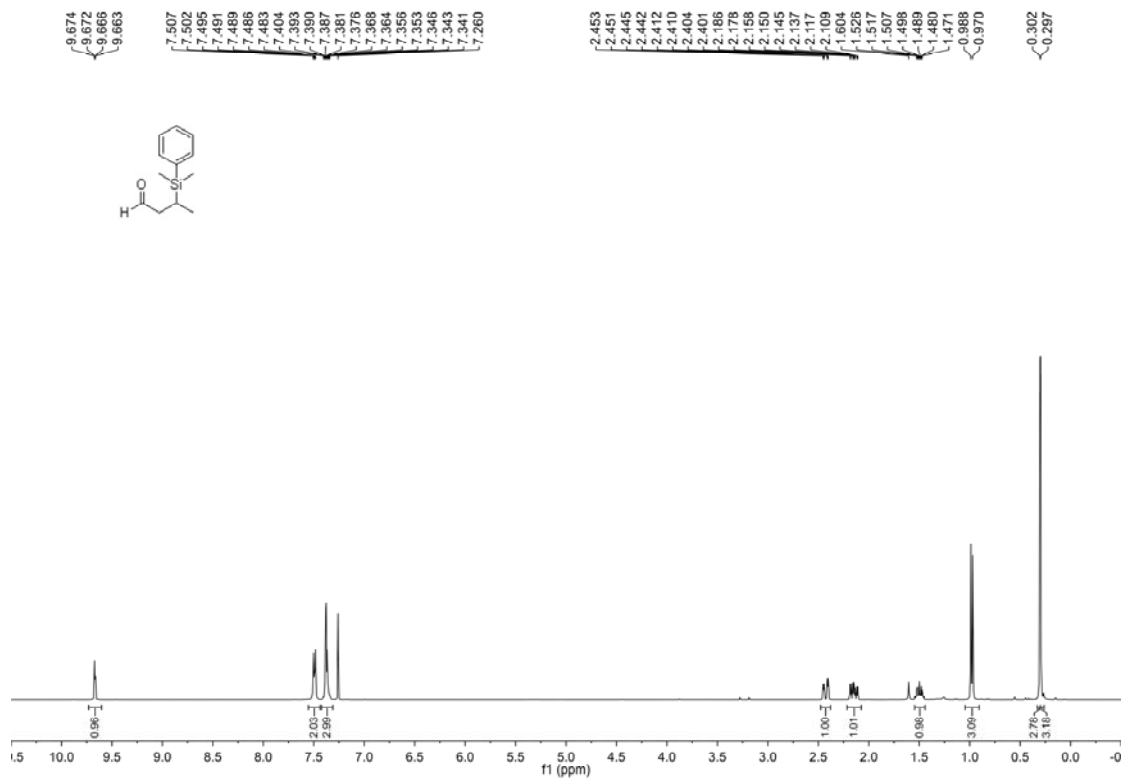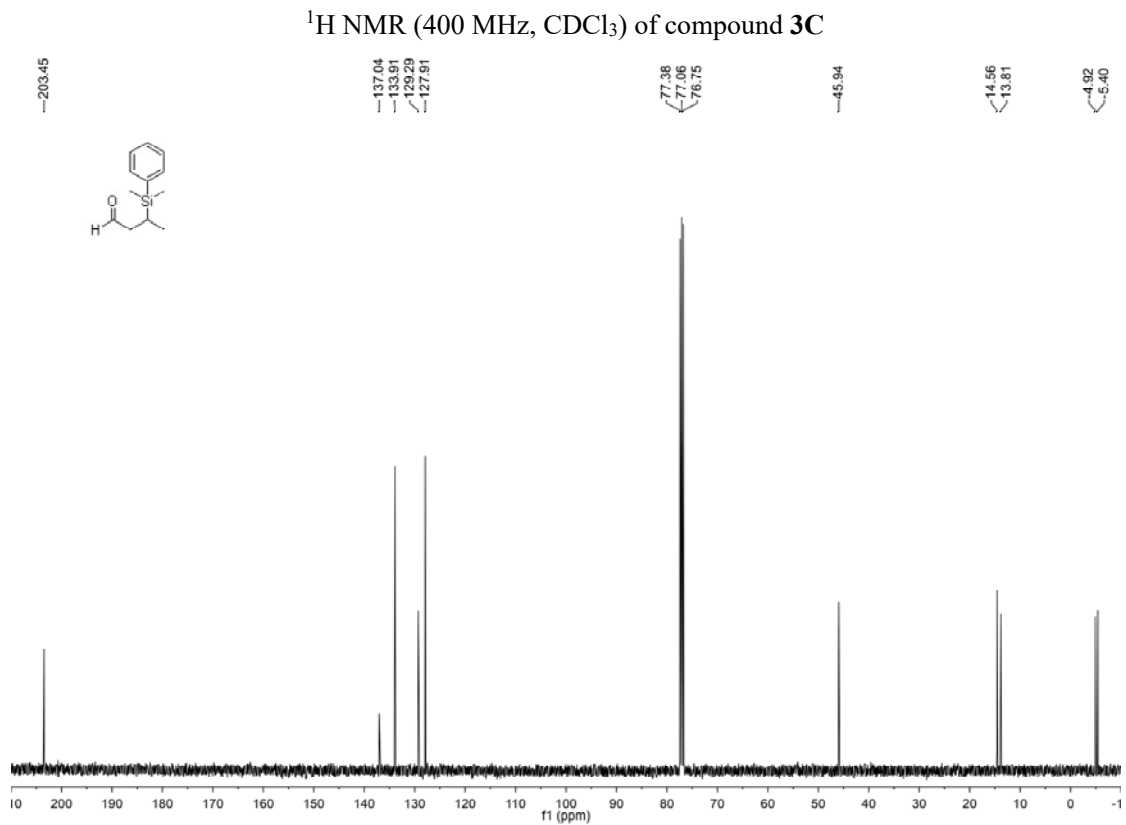

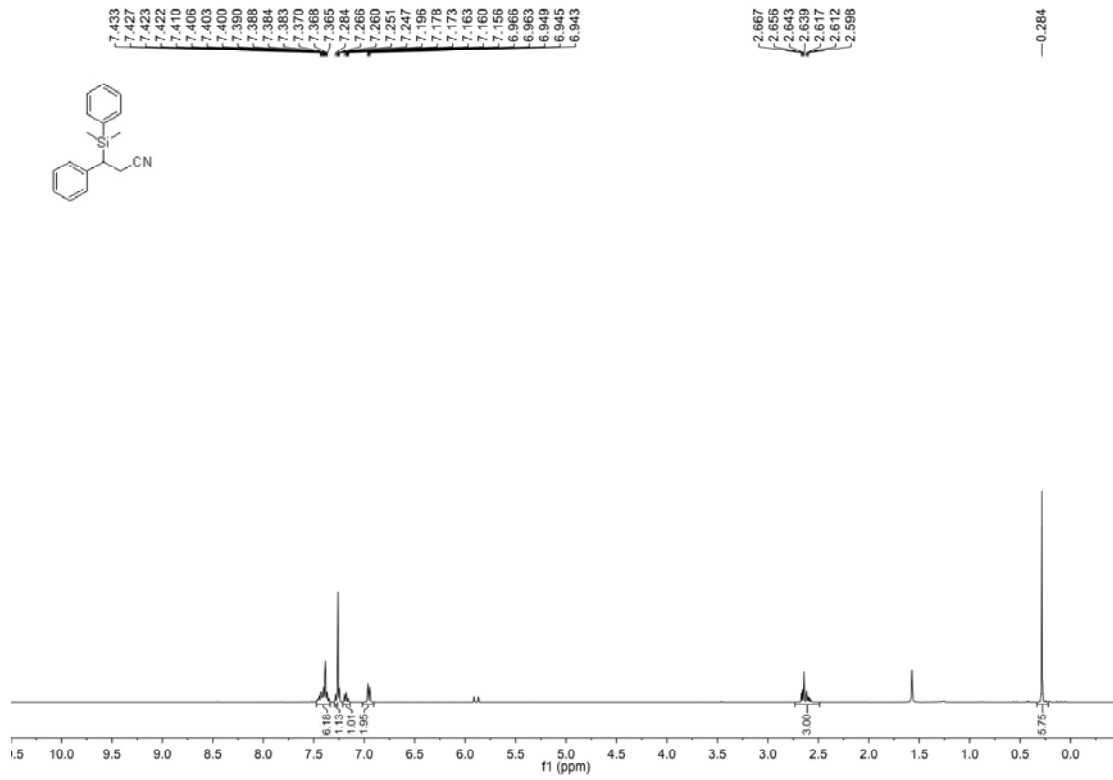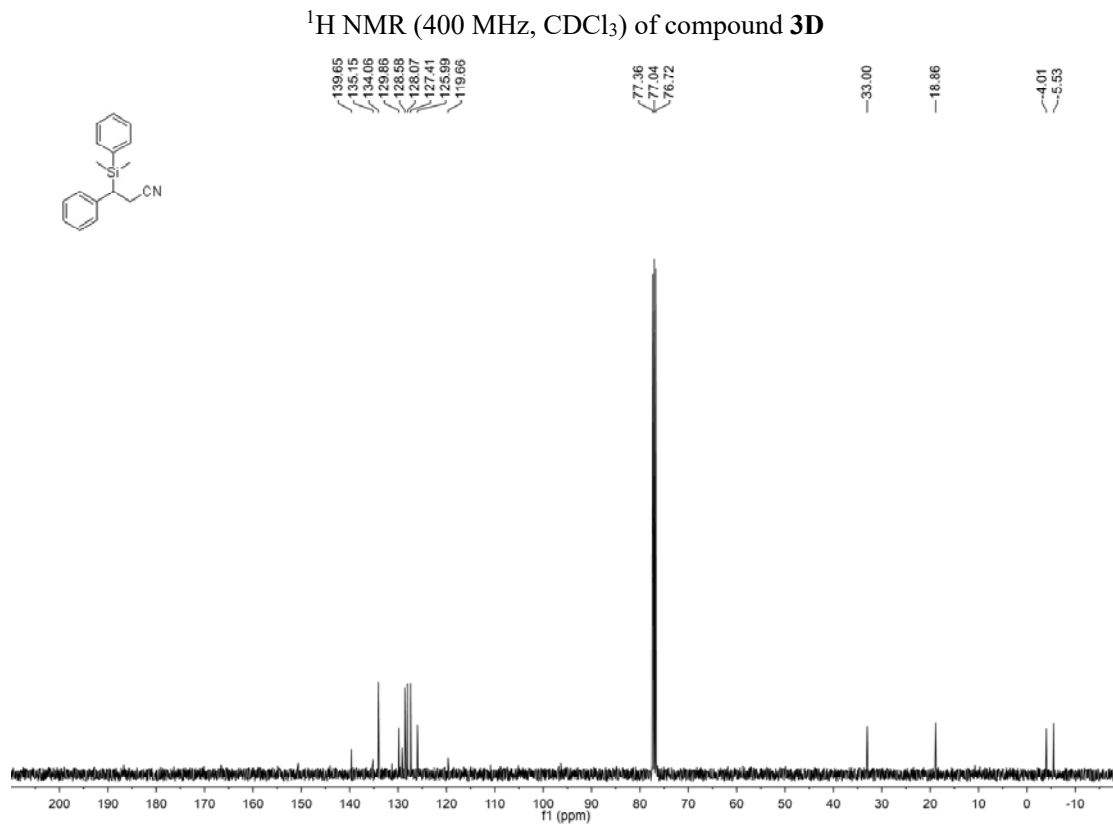

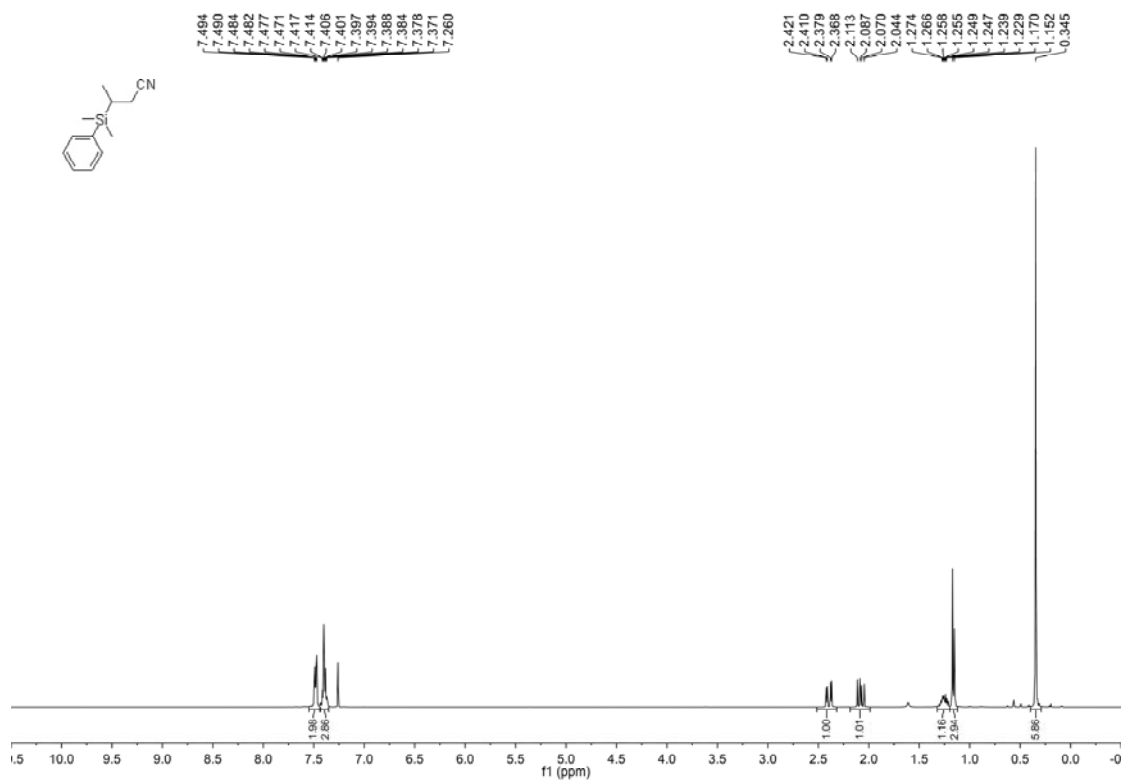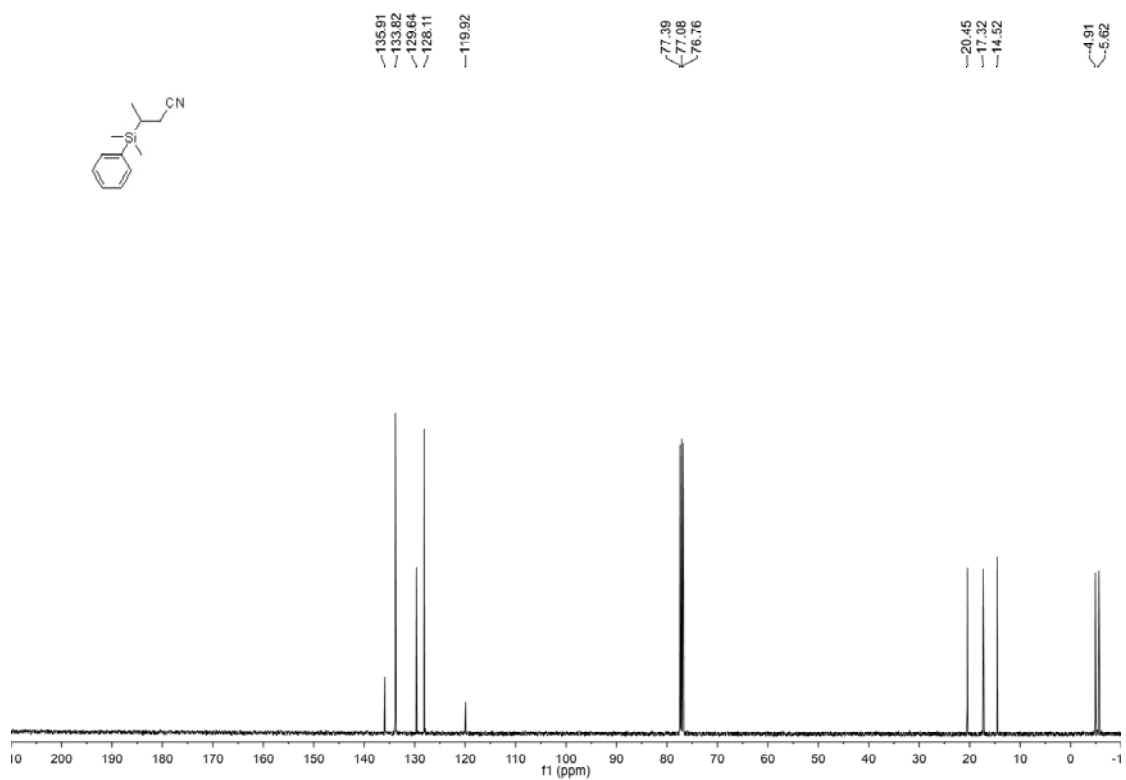

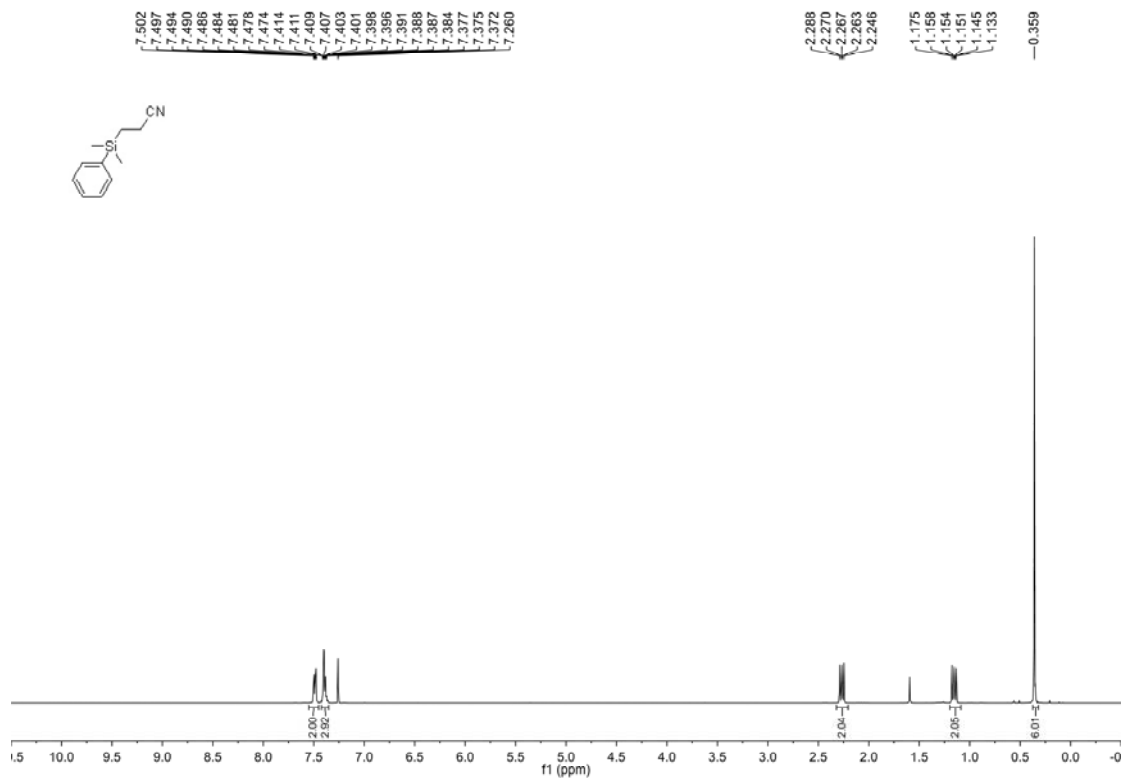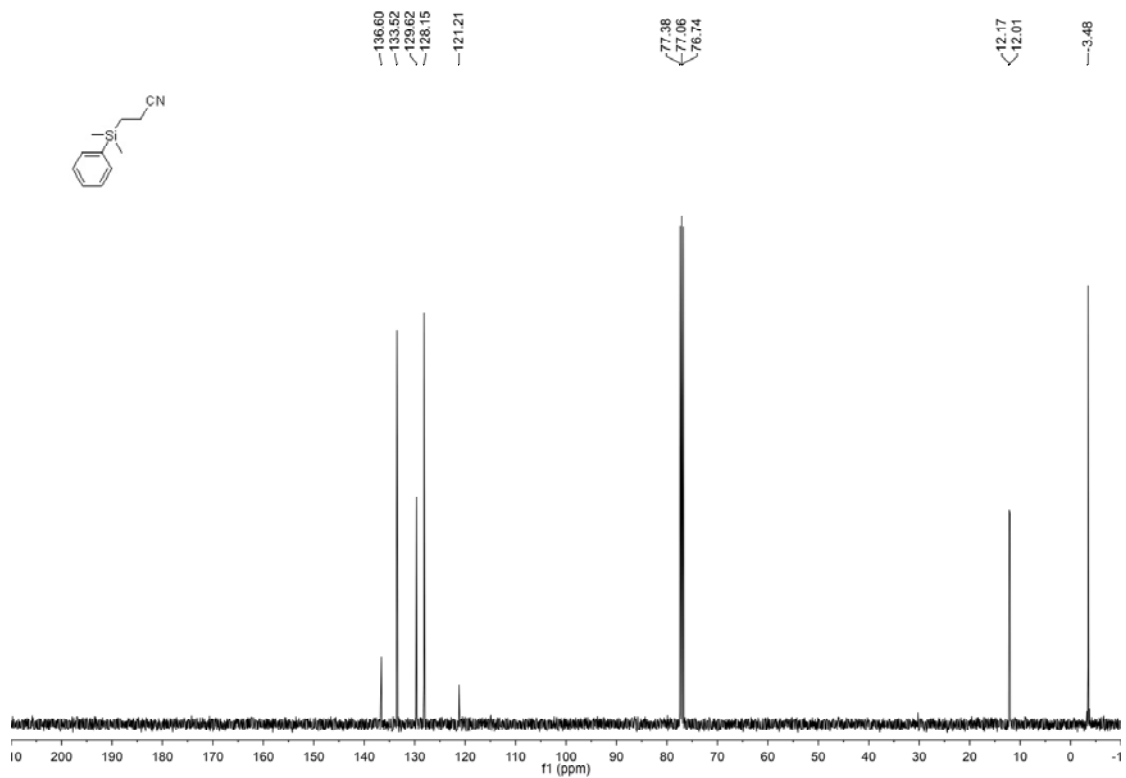

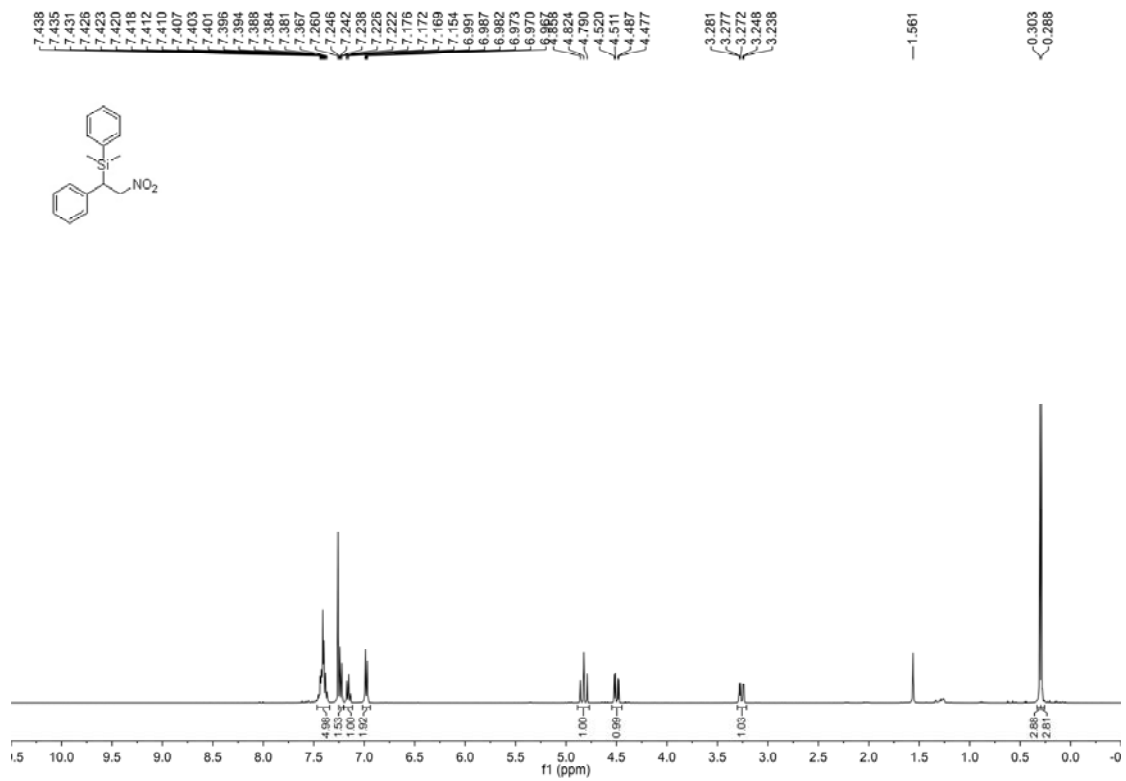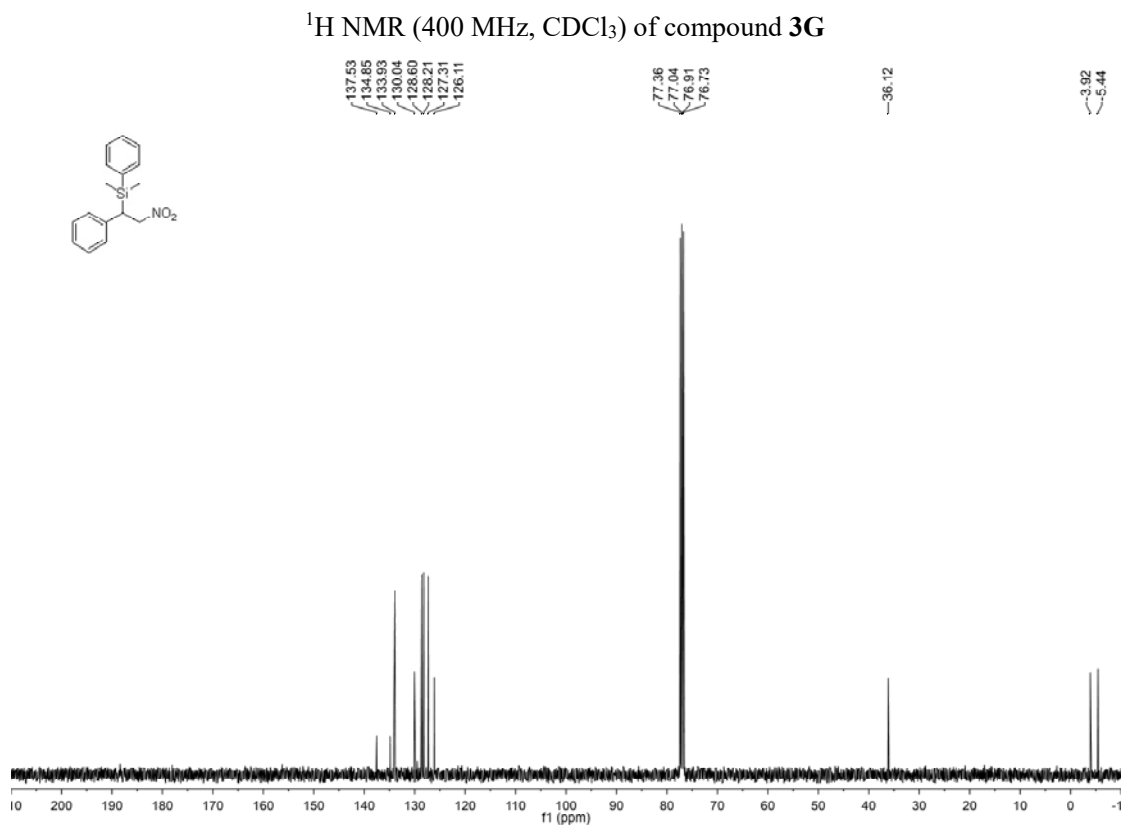

$^{13}\text{C}\{^1\text{H}\}$  NMR (100 MHz,  $\text{CDCl}_3$ ) of compound 3G

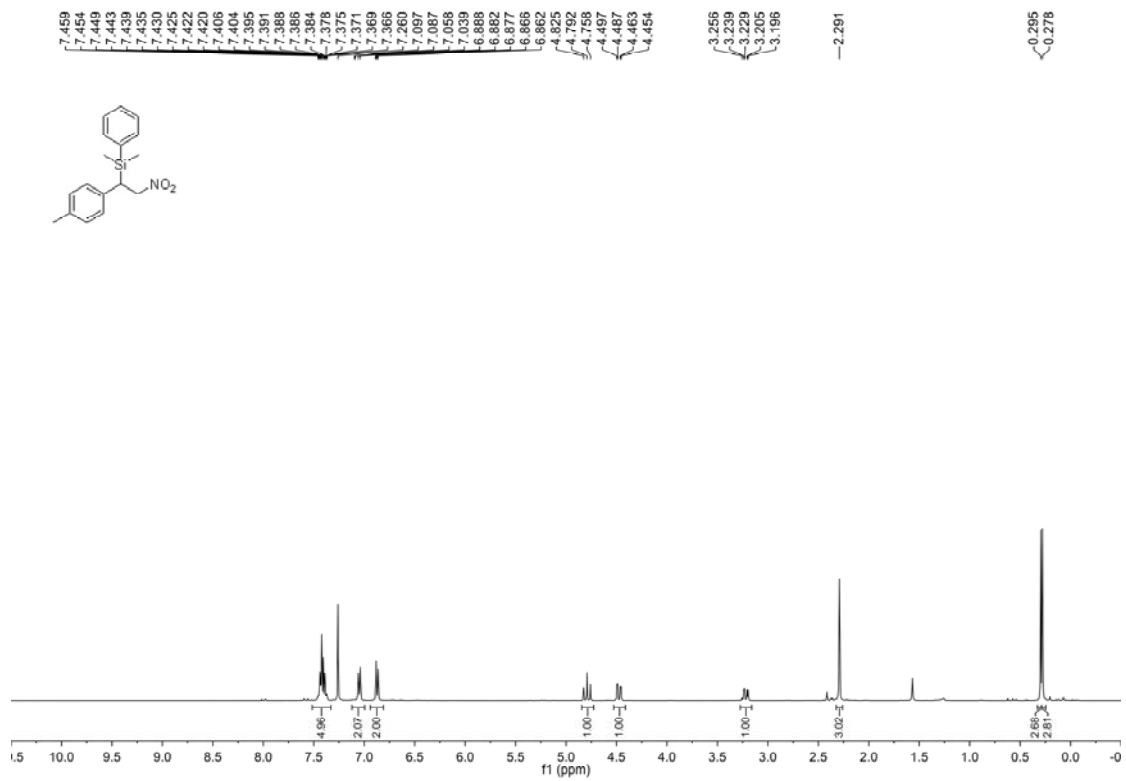

<sup>1</sup>H NMR (400 MHz, CDCl<sub>3</sub>) of compound 3H

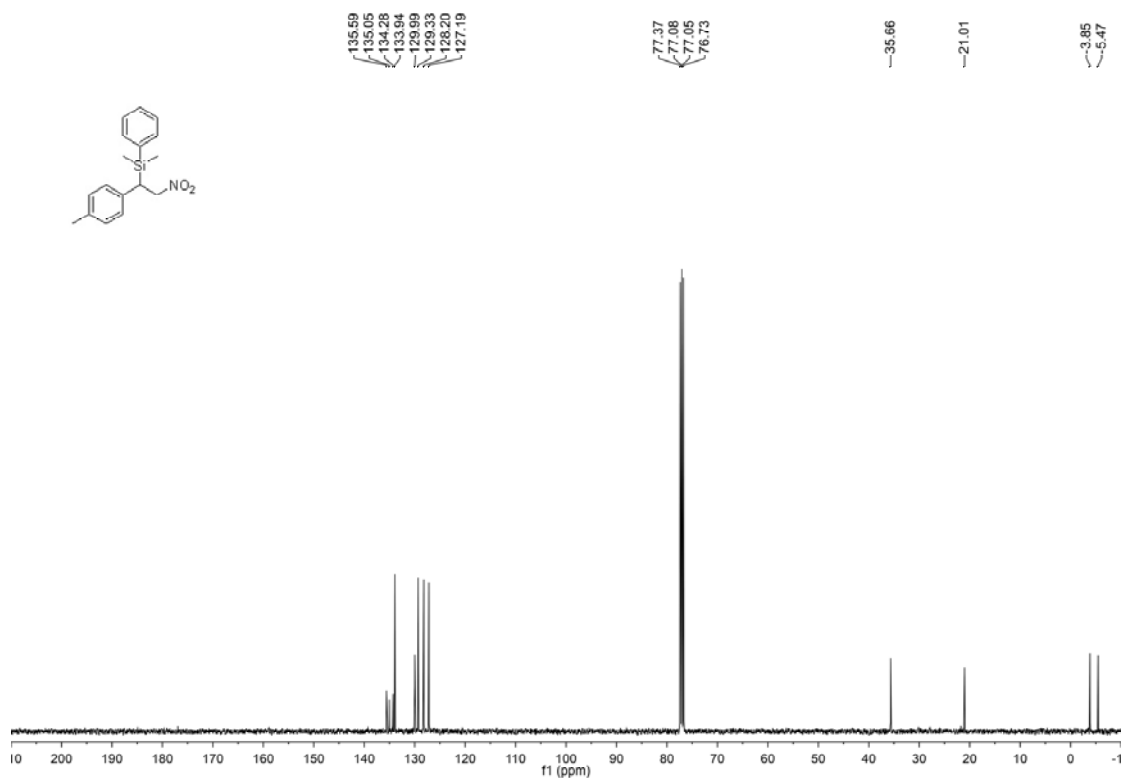

<sup>13</sup>C {<sup>1</sup>H} NMR (100 MHz, CDCl<sub>3</sub>) of compound 3H

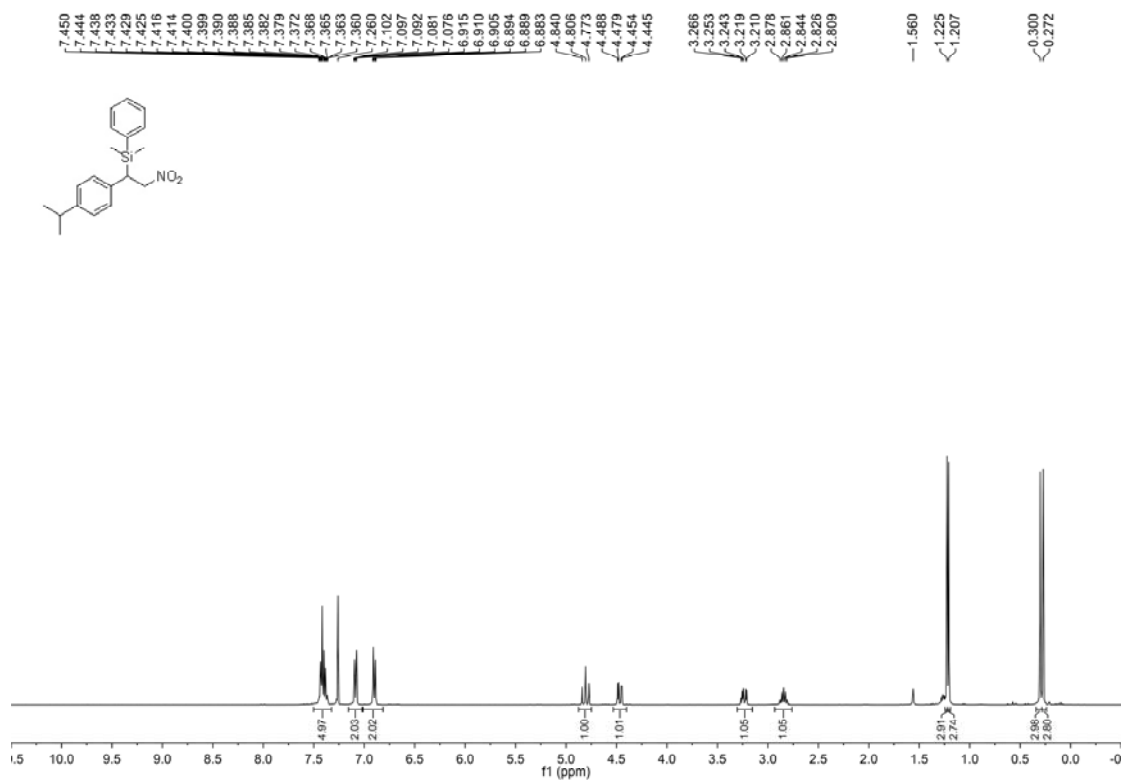

$^1\text{H}$  NMR (400 MHz,  $\text{CDCl}_3$ ) of compound **3I**

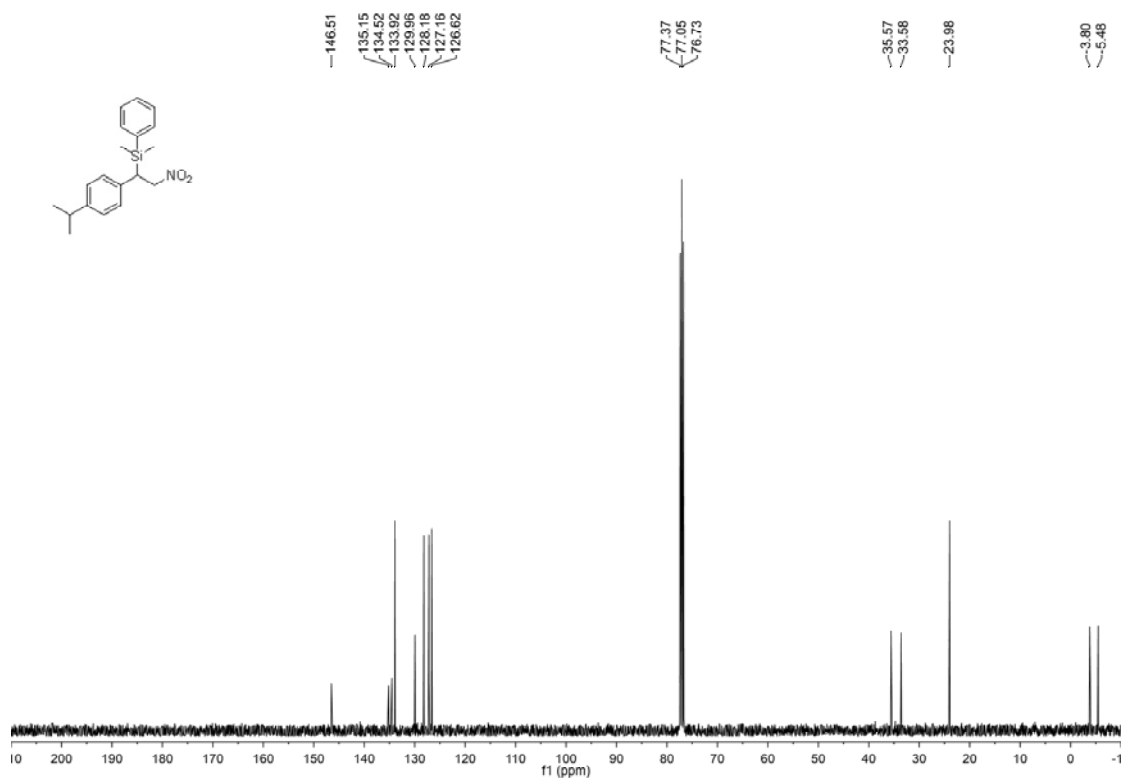

$^{13}\text{C}$  NMR (100 MHz,  $\text{CDCl}_3$ ) of compound **3I**



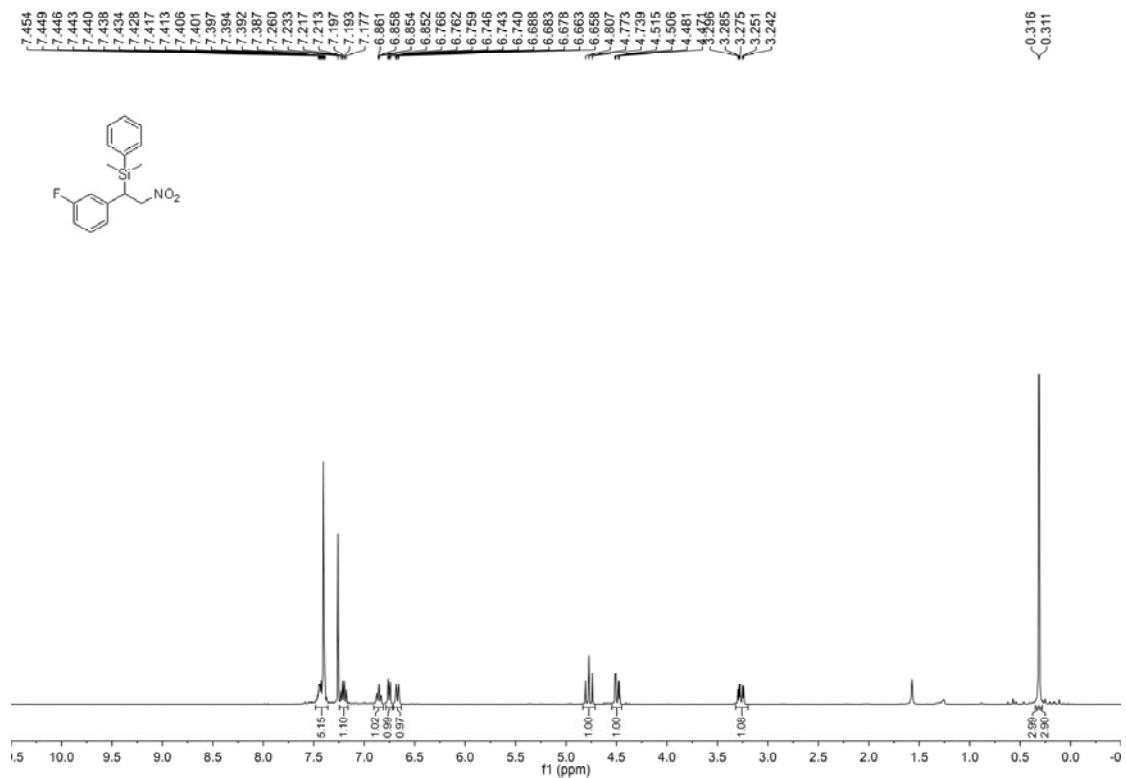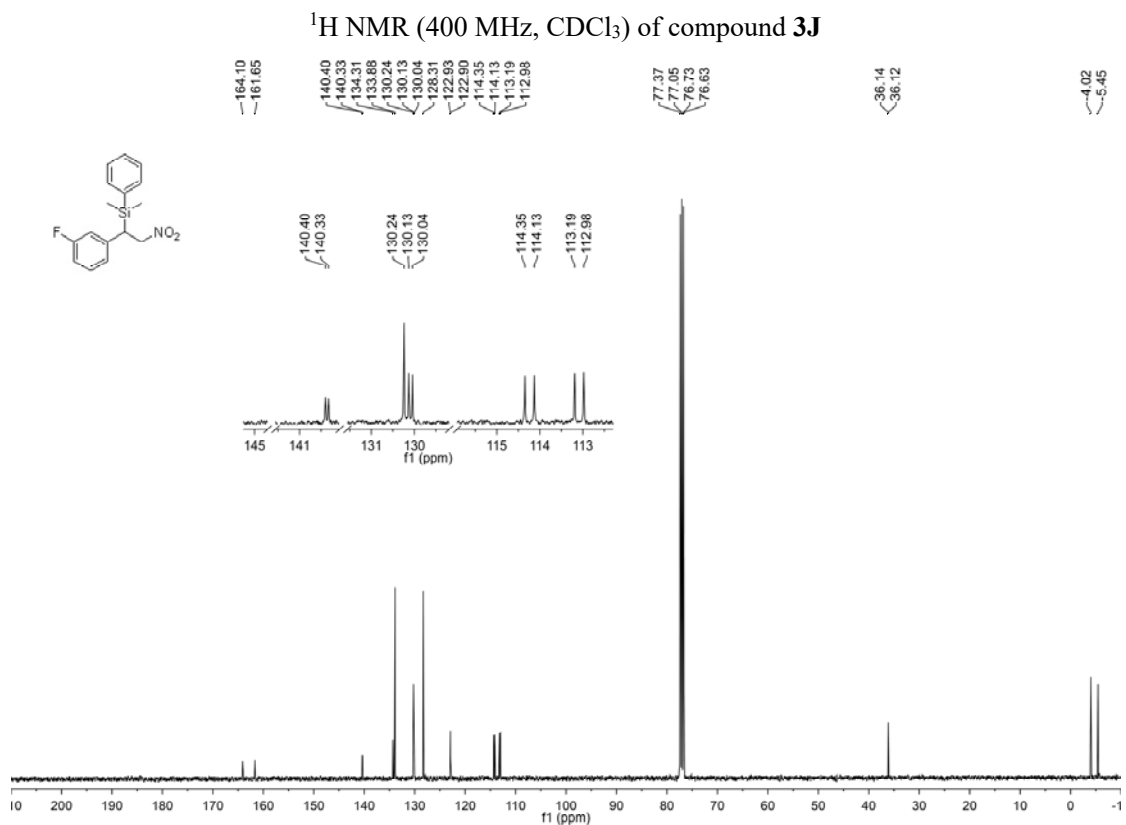

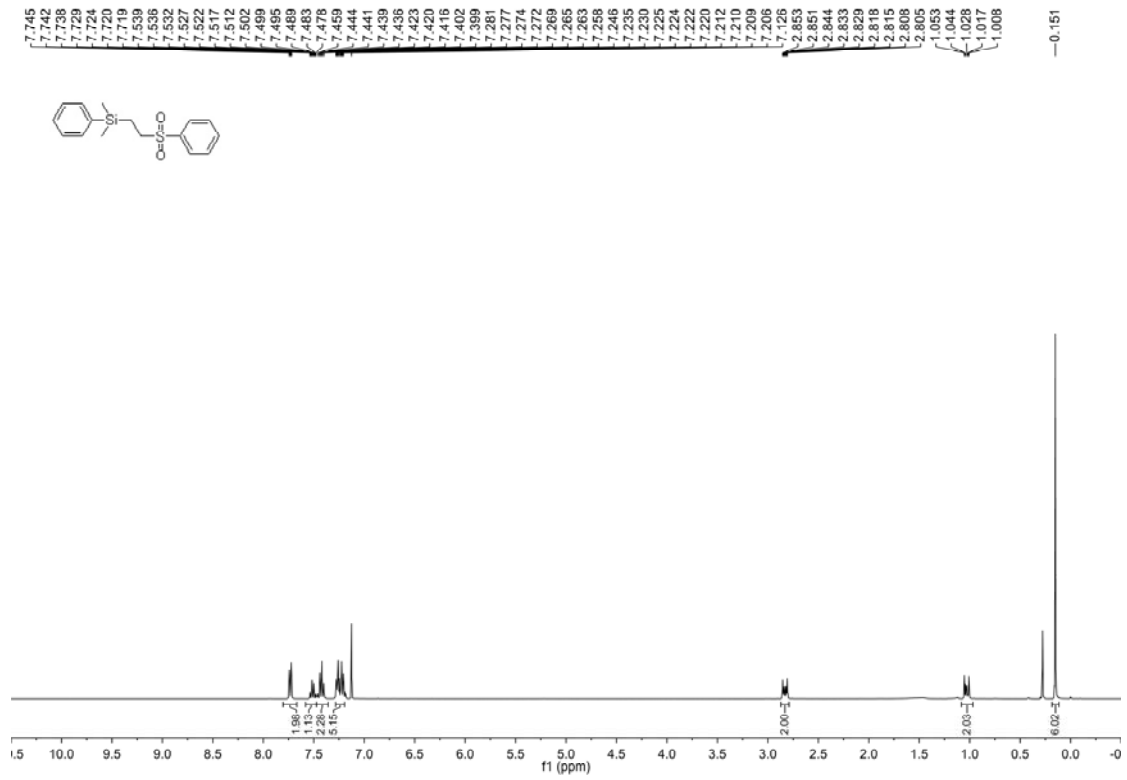

$^1\text{H}$  NMR (400 MHz,  $\text{CDCl}_3$ ) of compound **3K**

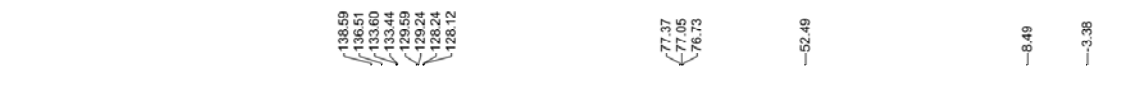

$^{13}\text{C}\{^1\text{H}\}$  NMR (100 MHz,  $\text{CDCl}_3$ ) of compound **3K**

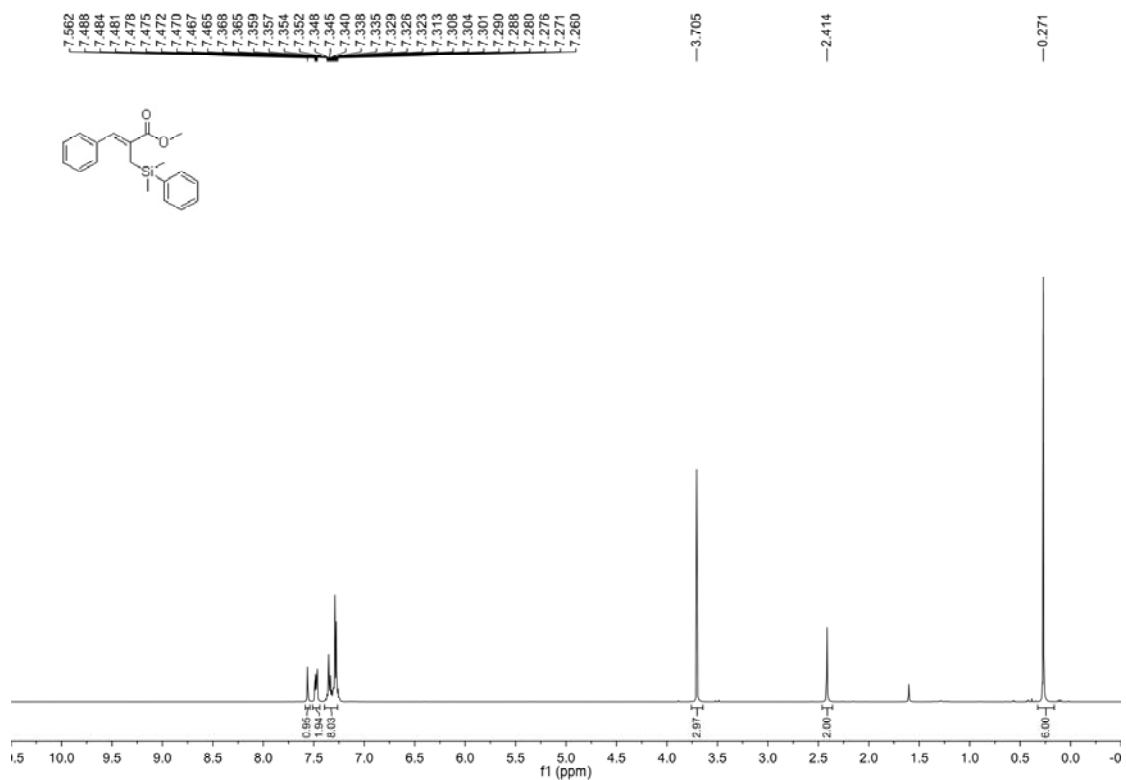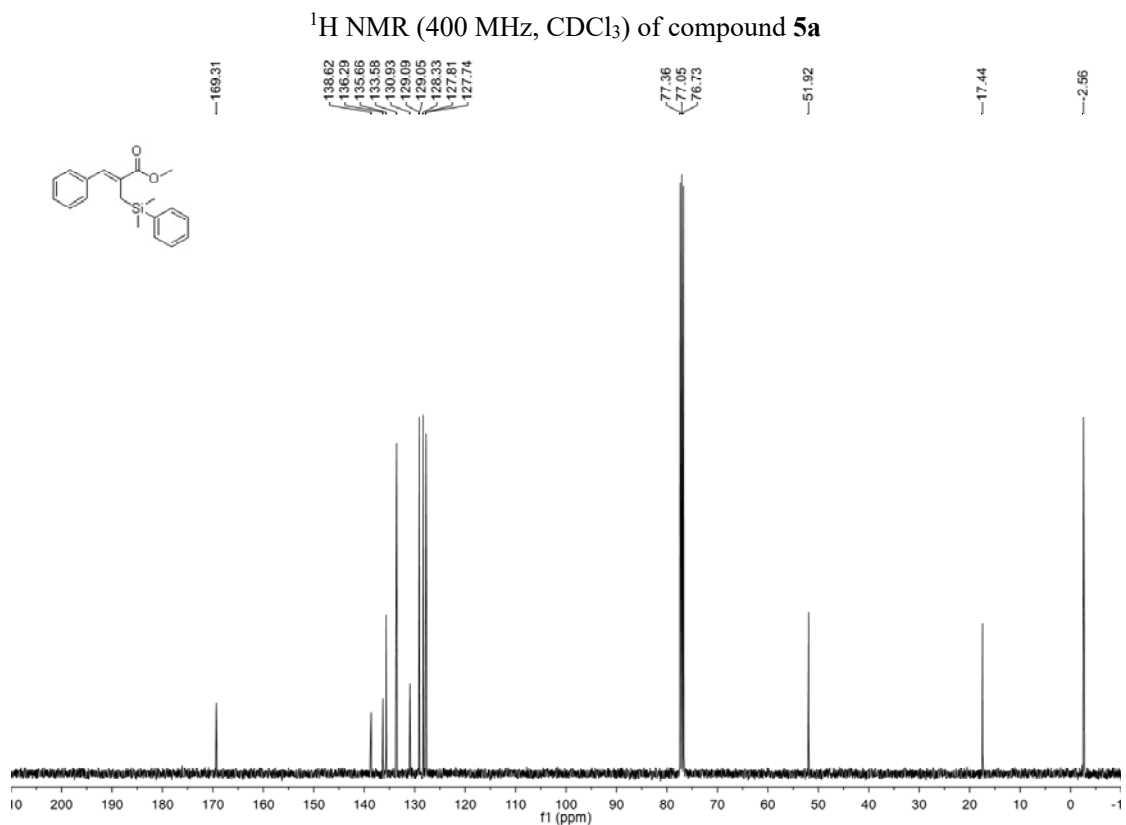

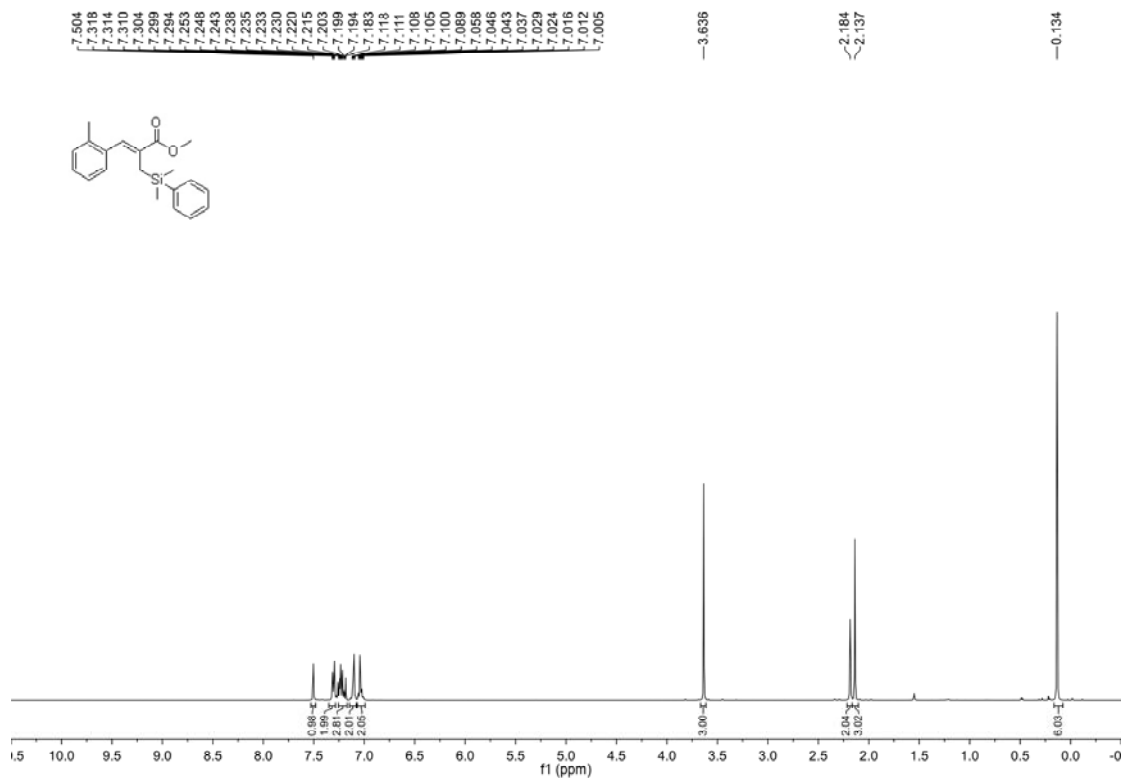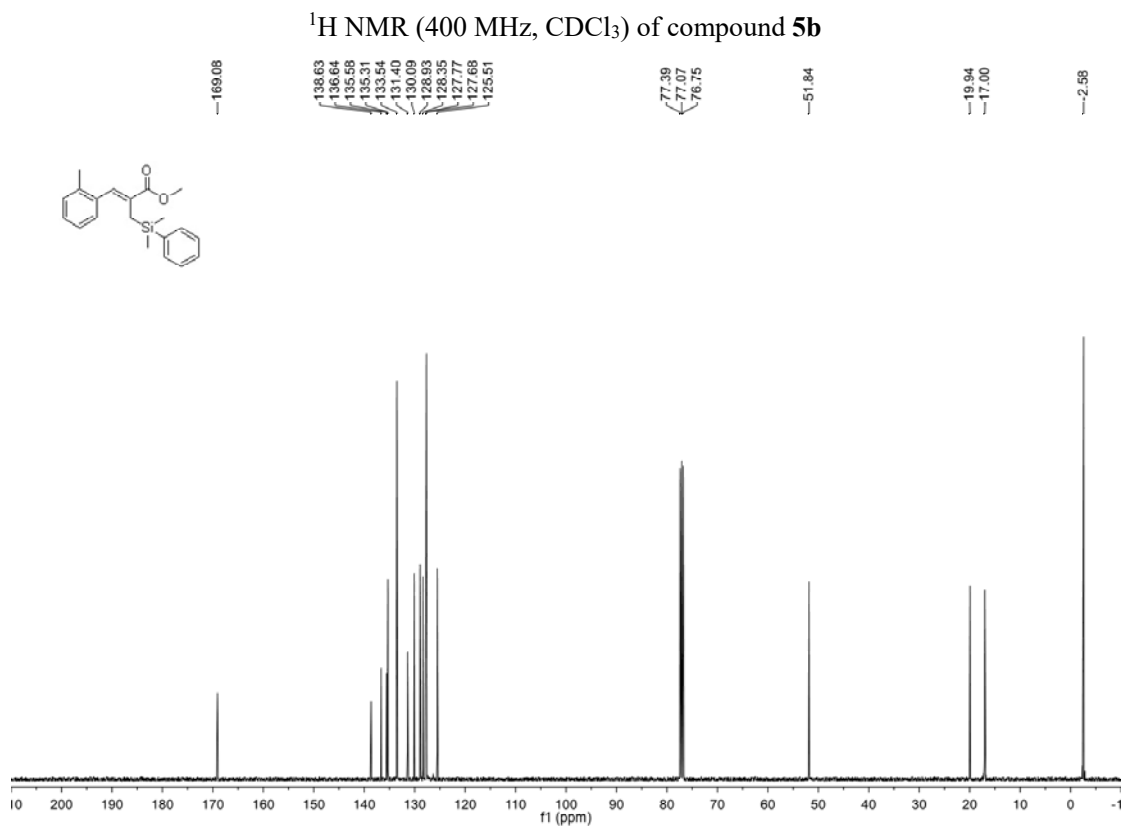

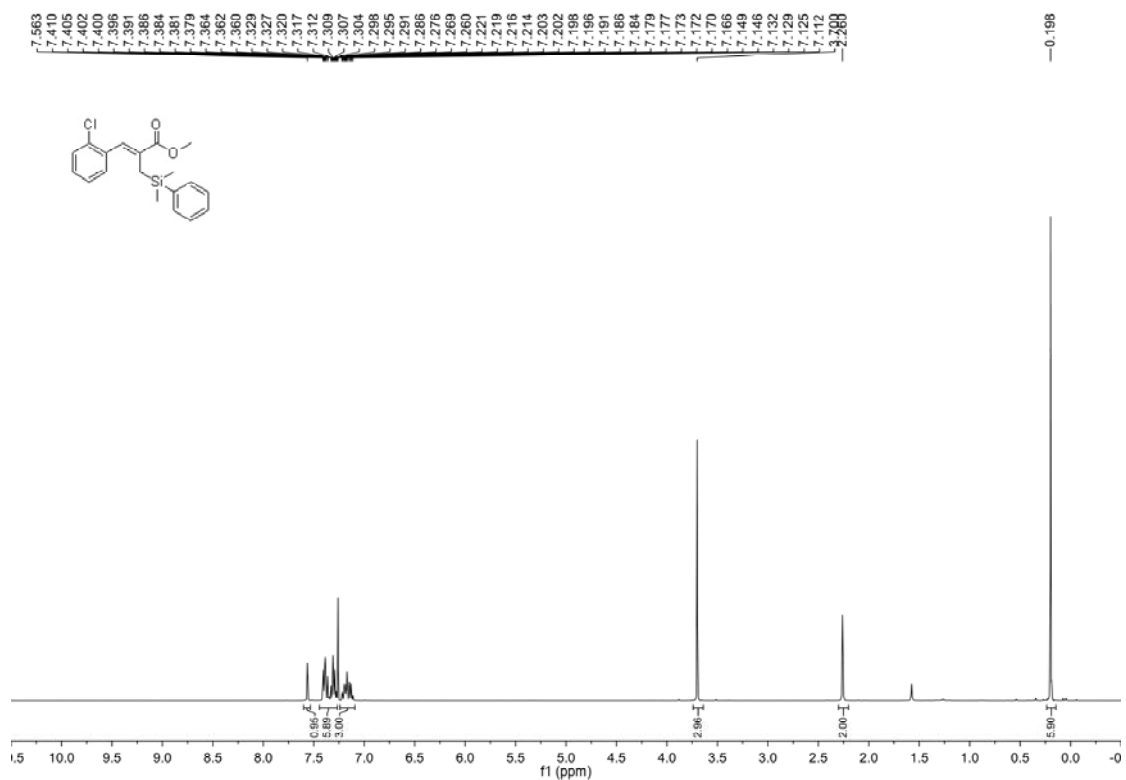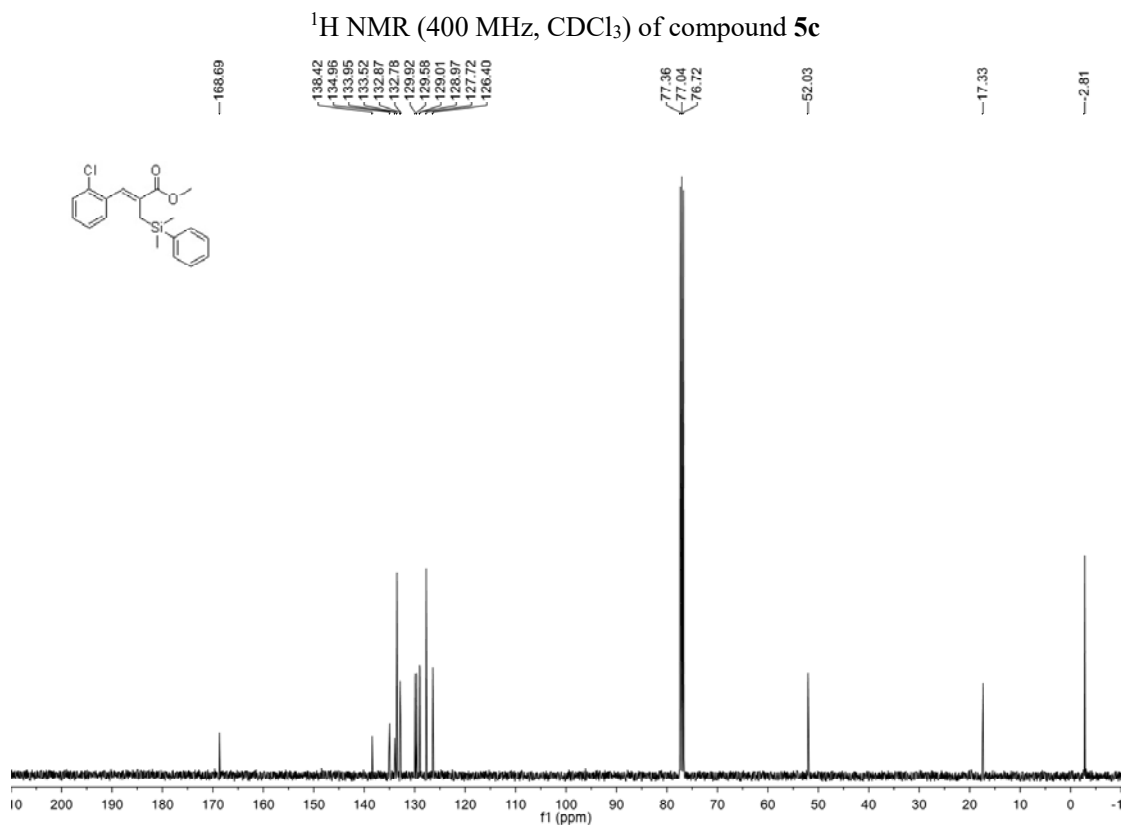

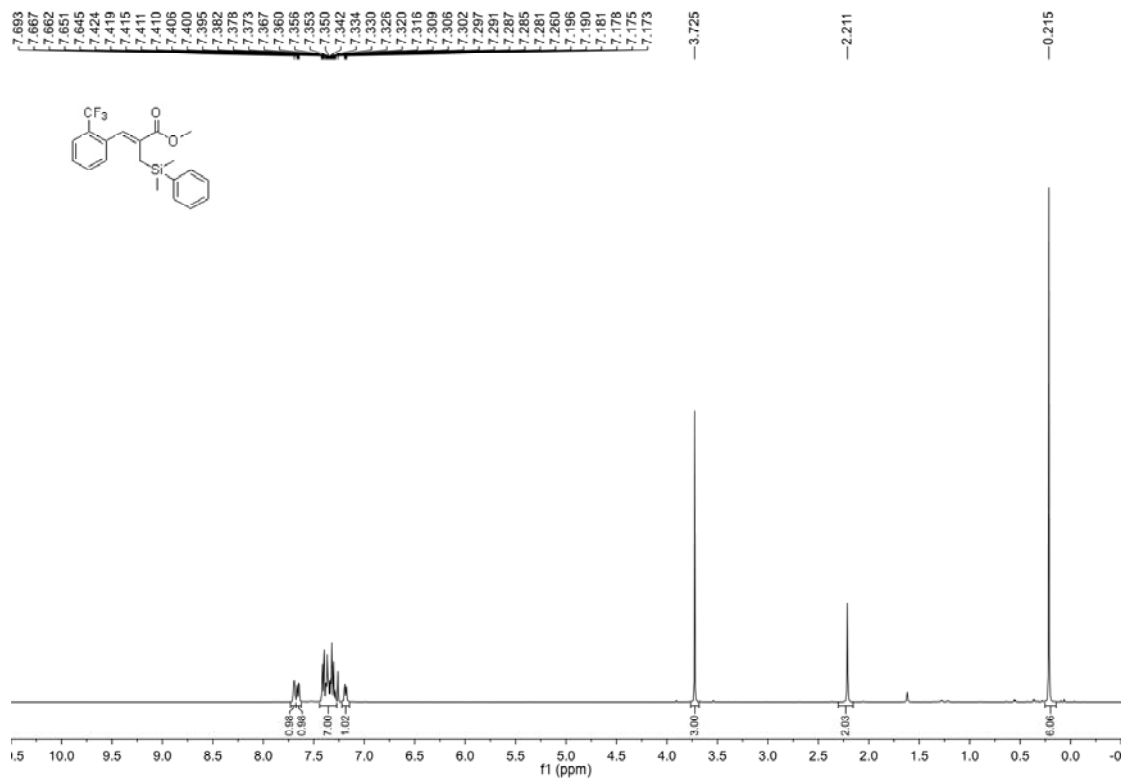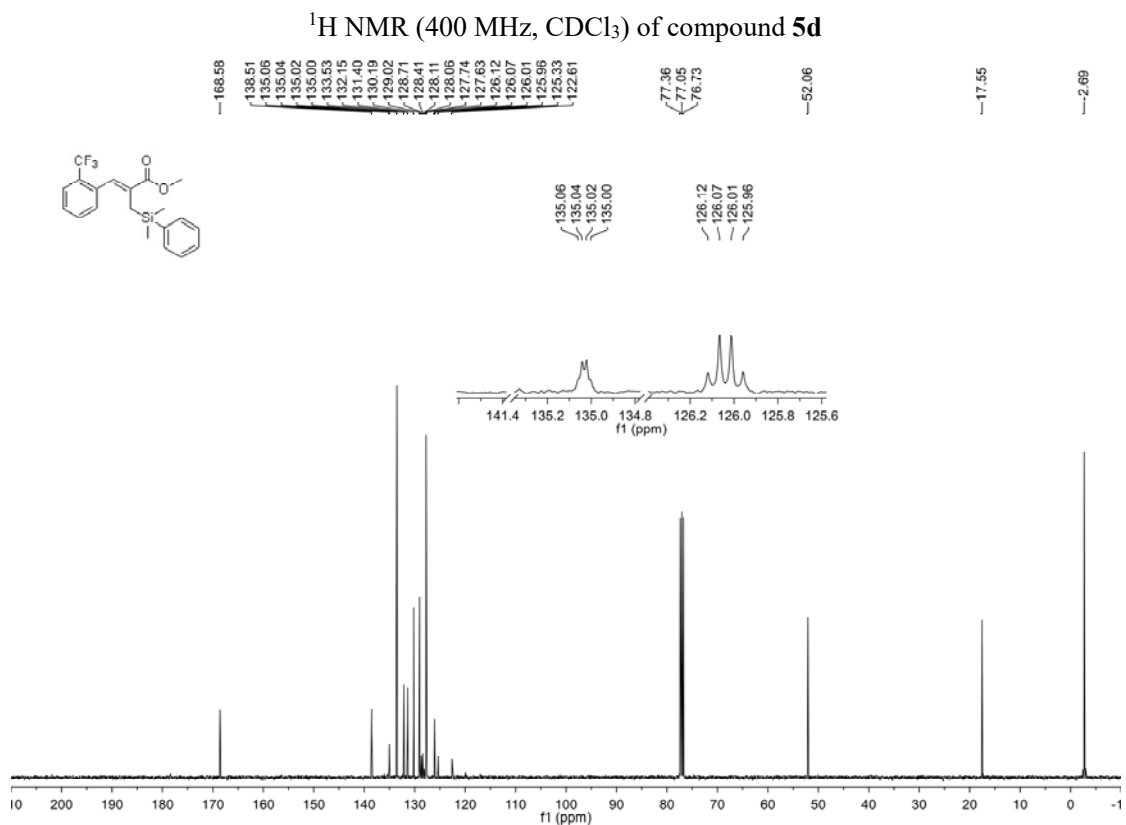

$^{13}\text{C}\{^1\text{H}\}$  NMR (100 MHz,  $\text{CDCl}_3$ ) of compound **5d**

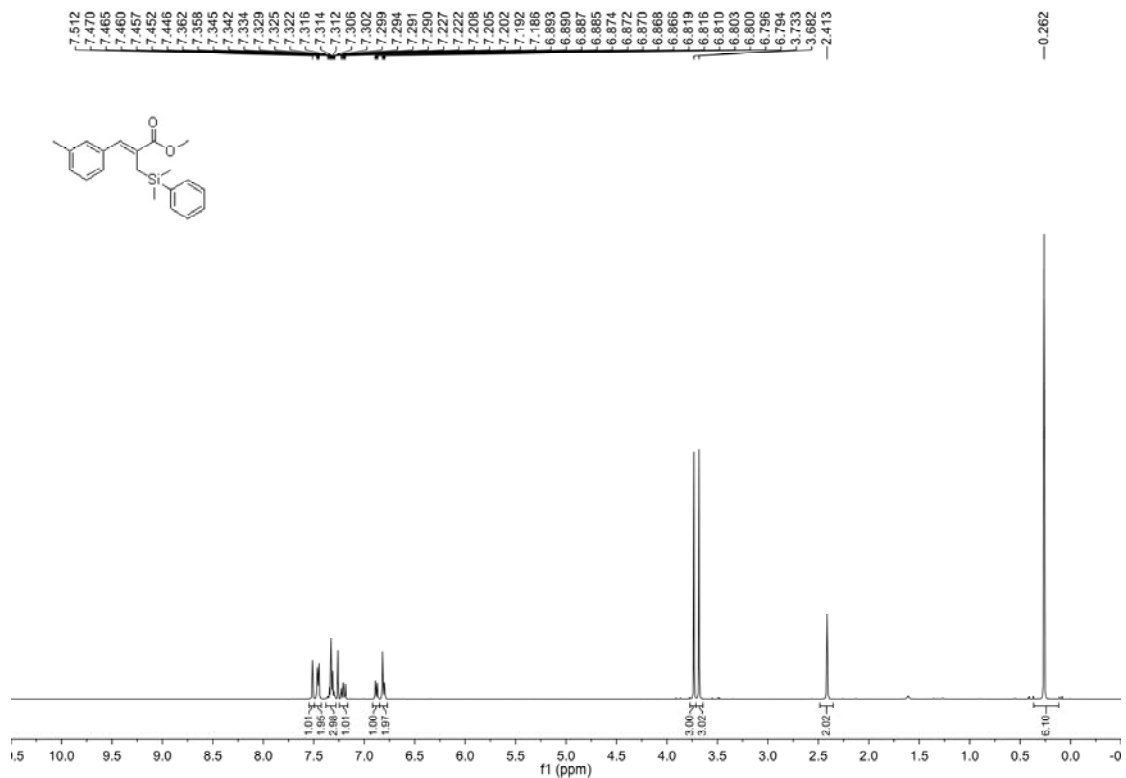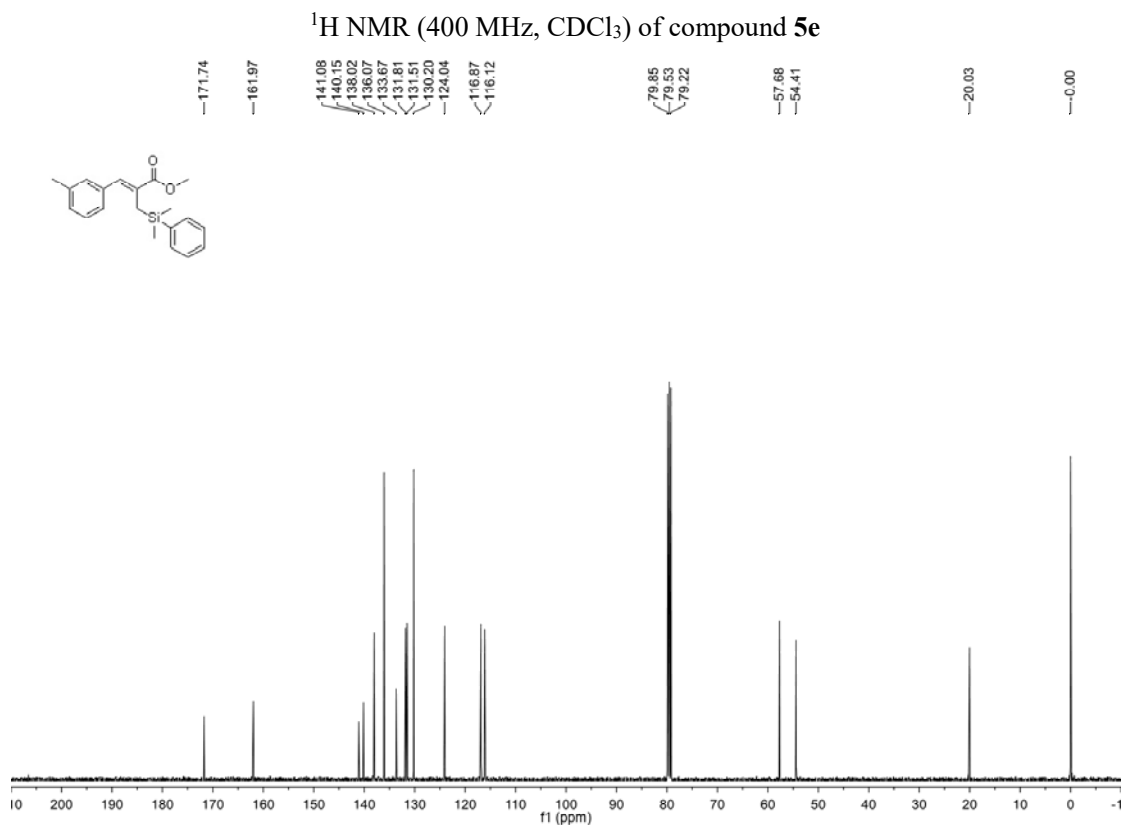

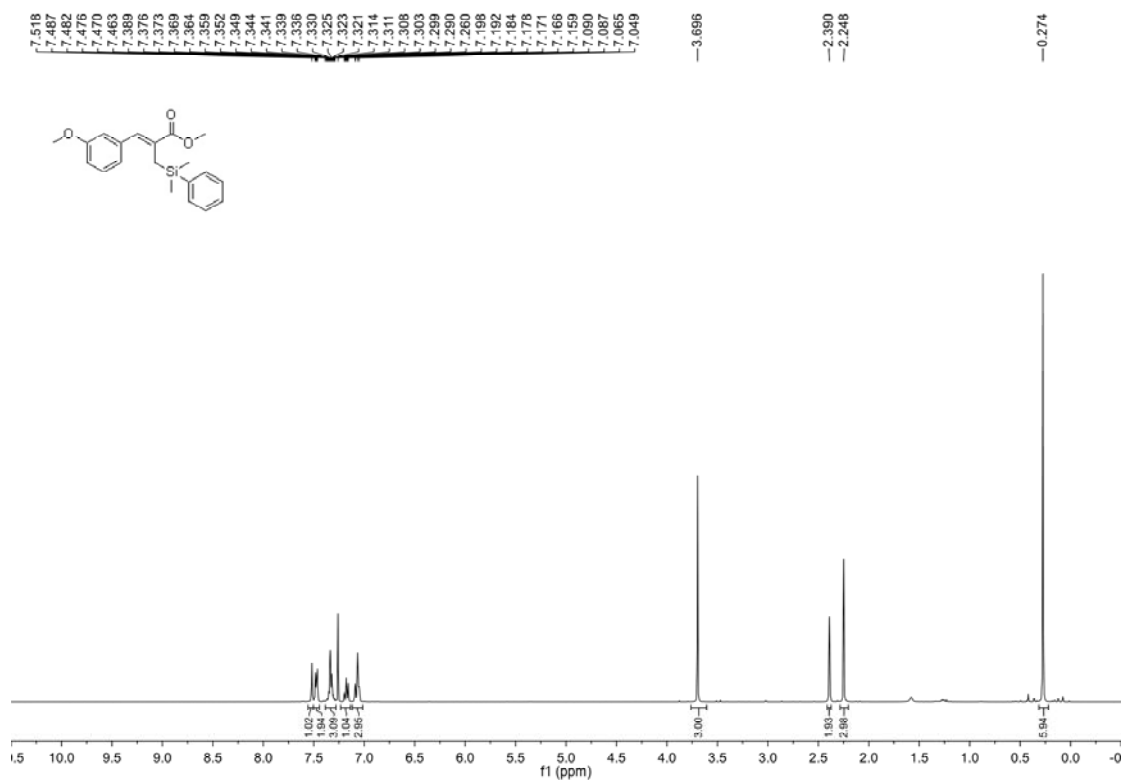

$^1\text{H}$  NMR (400 MHz,  $\text{CDCl}_3$ ) of compound **5f**

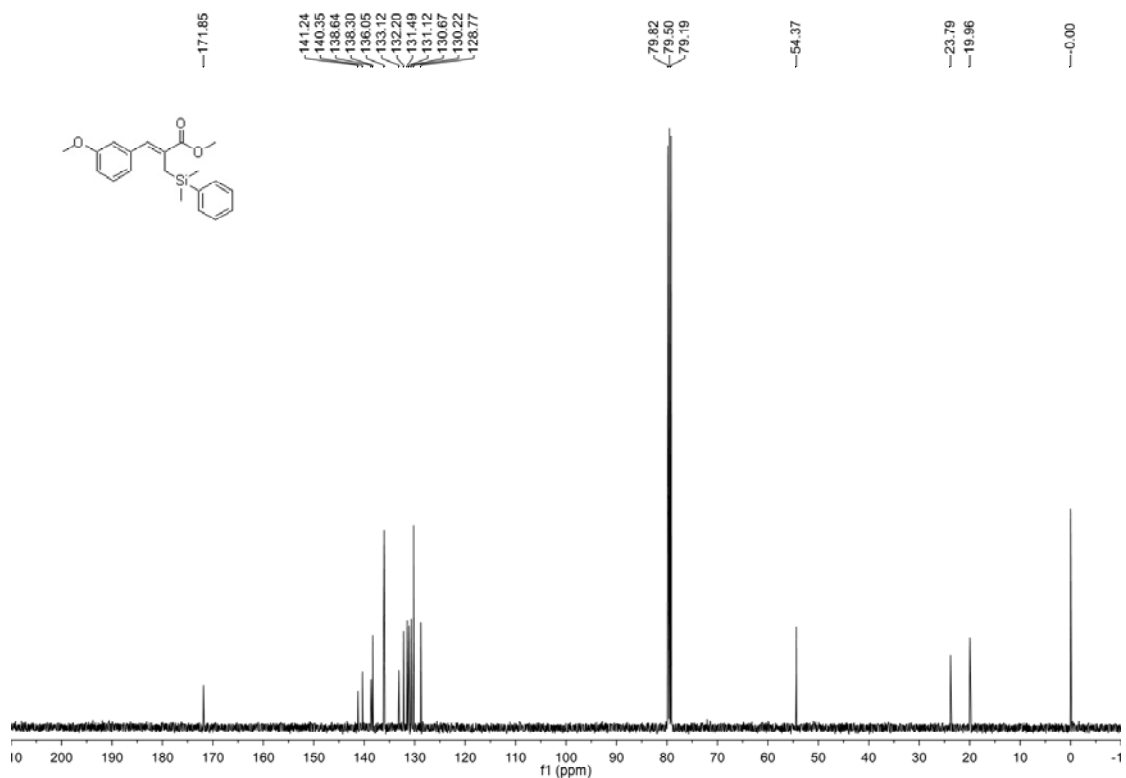

$^{13}\text{C}\{^1\text{H}\}$  NMR (100 MHz,  $\text{CDCl}_3$ ) of compound **5f**



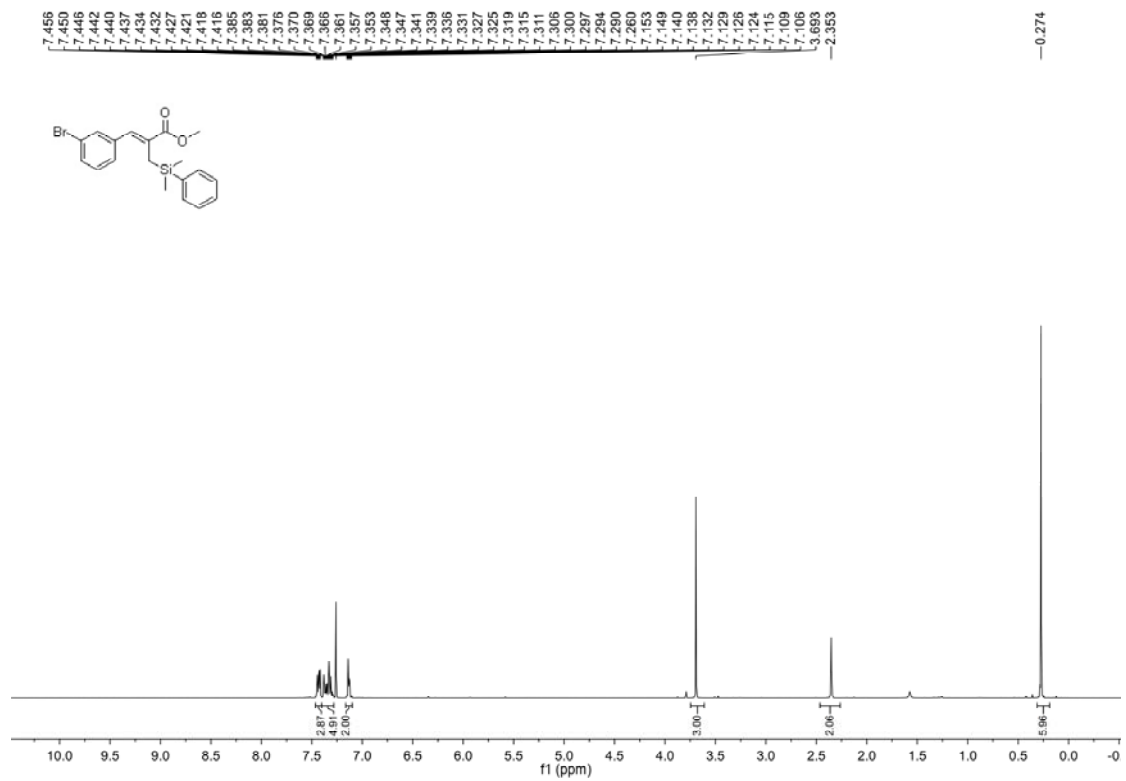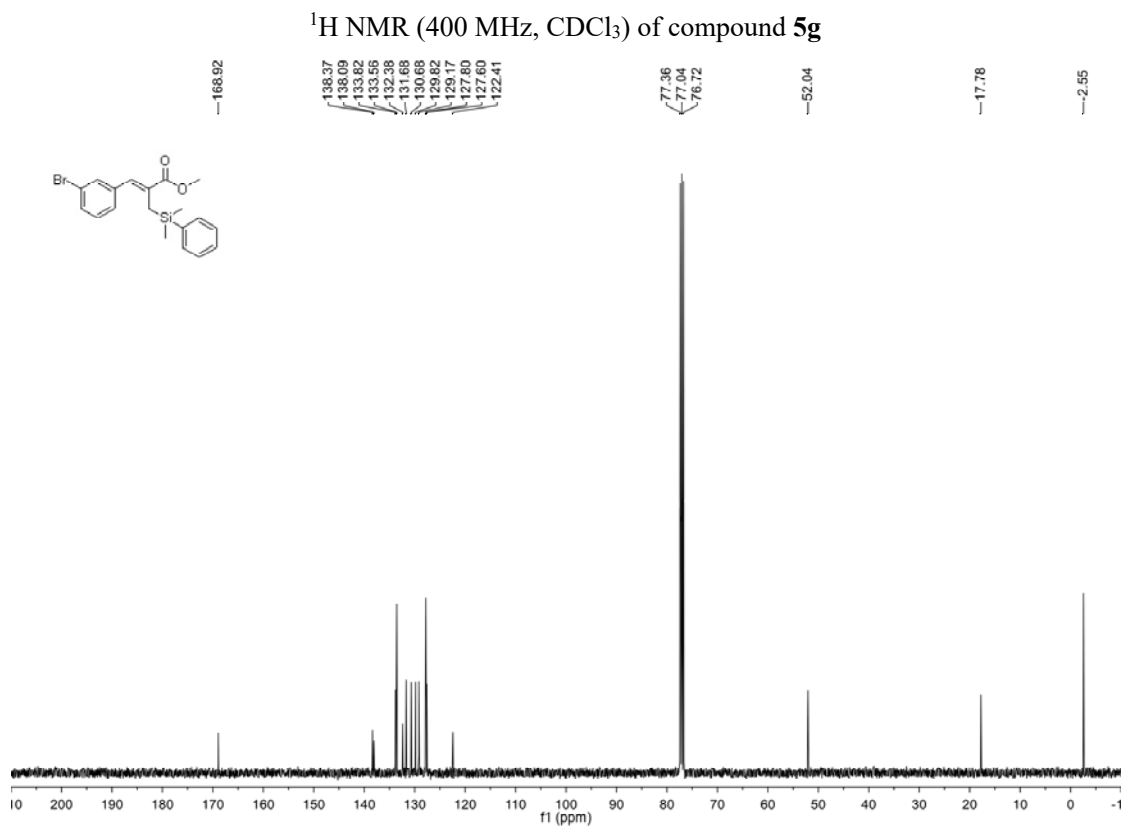

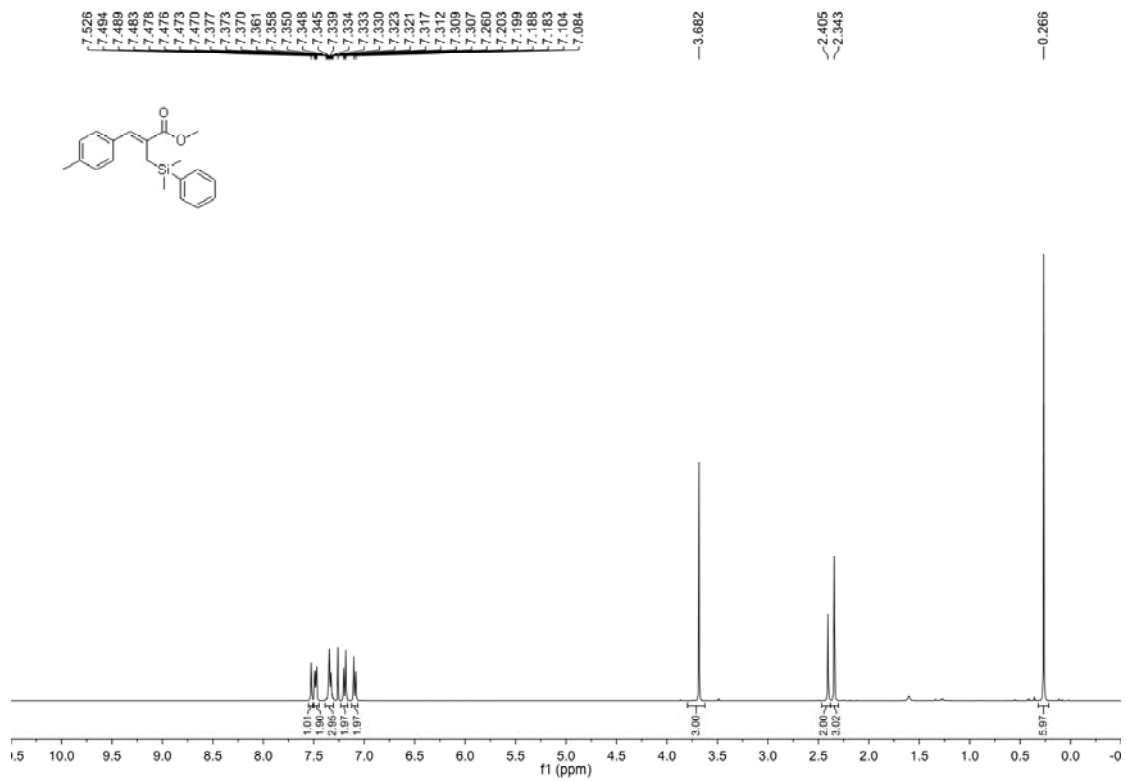

<sup>1</sup>H NMR (400 MHz, CDCl<sub>3</sub>) of compound **5h**

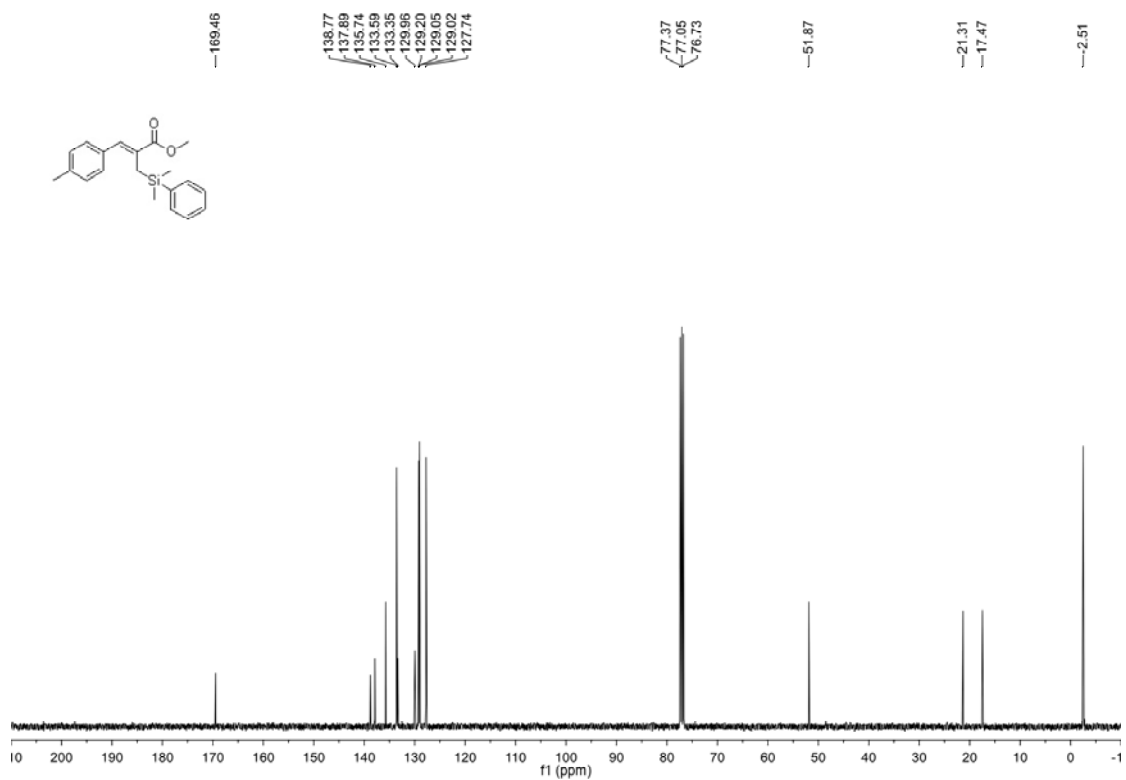

<sup>13</sup>C{<sup>1</sup>H} NMR (100 MHz, CDCl<sub>3</sub>) of compound **5h**

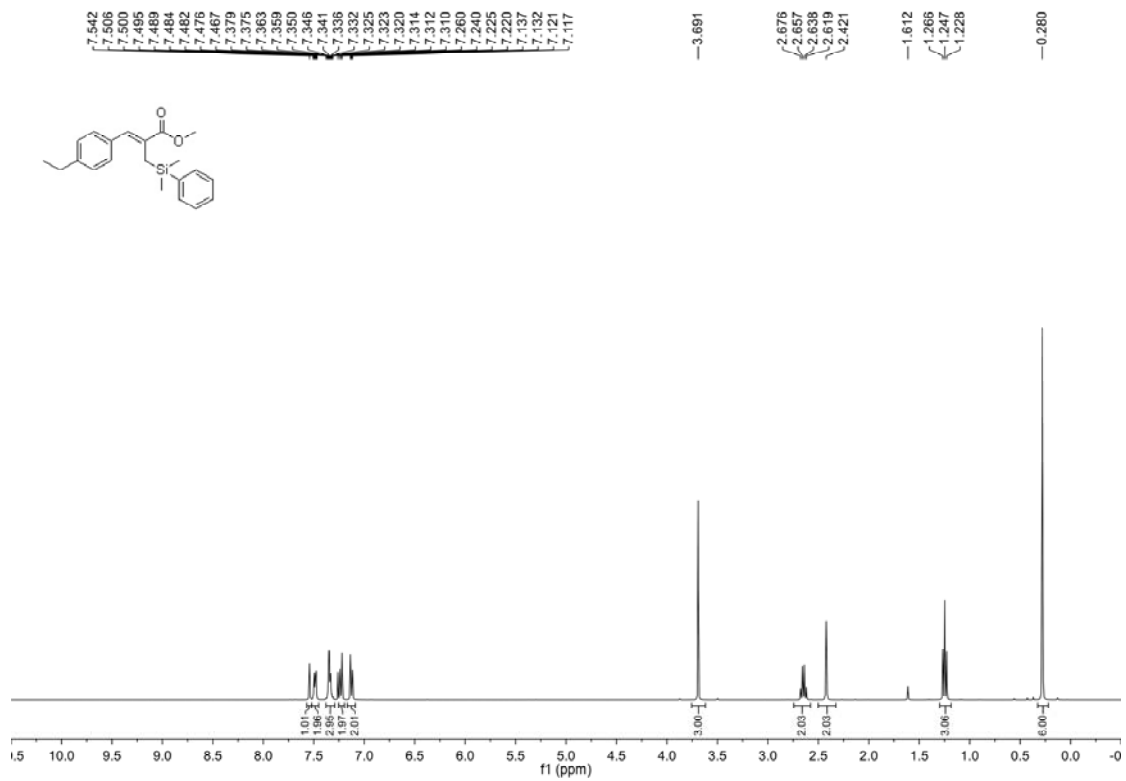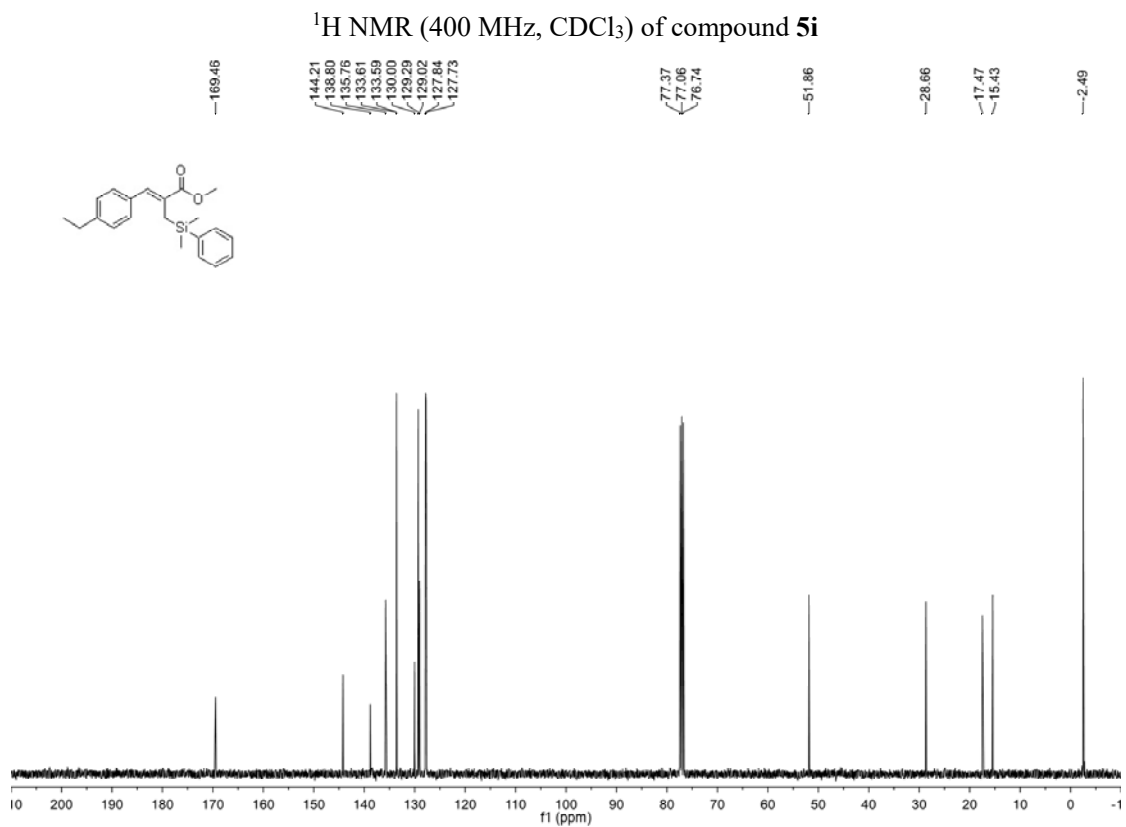

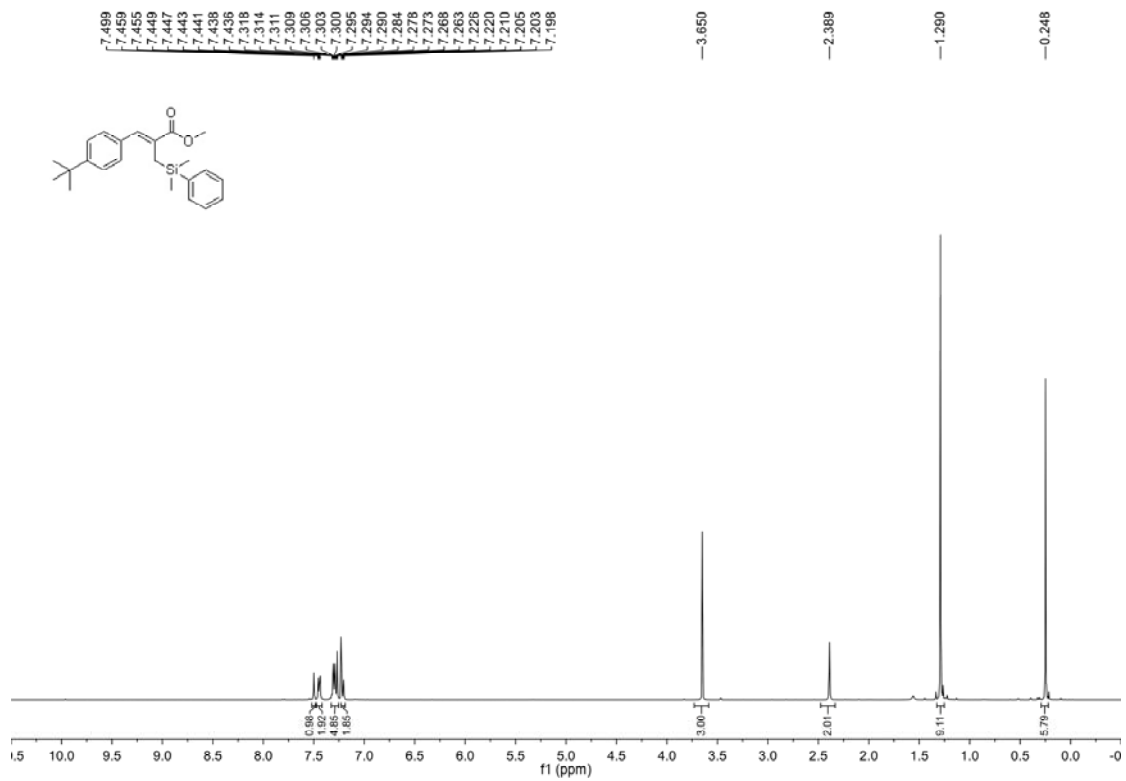

$^1\text{H}$  NMR (400 MHz,  $\text{CDCl}_3$ ) of compound **5j**

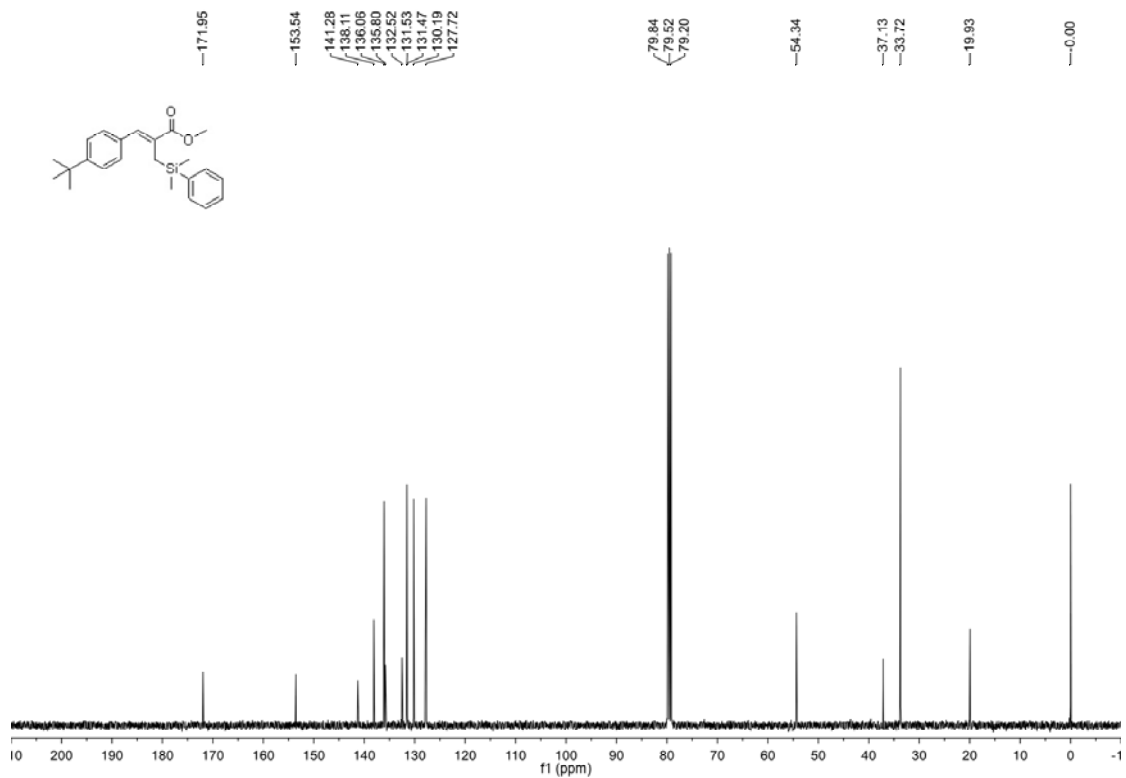

$^{13}\text{C}\{^1\text{H}\}$  NMR (100 MHz,  $\text{CDCl}_3$ ) of compound **5j**

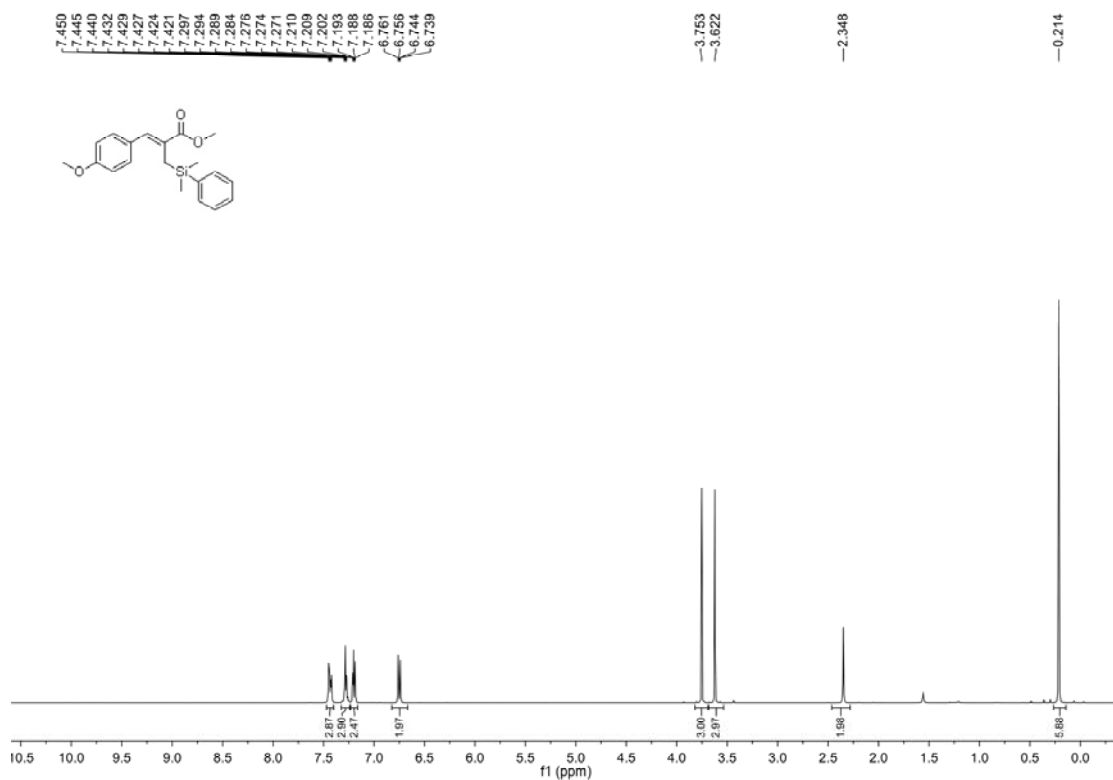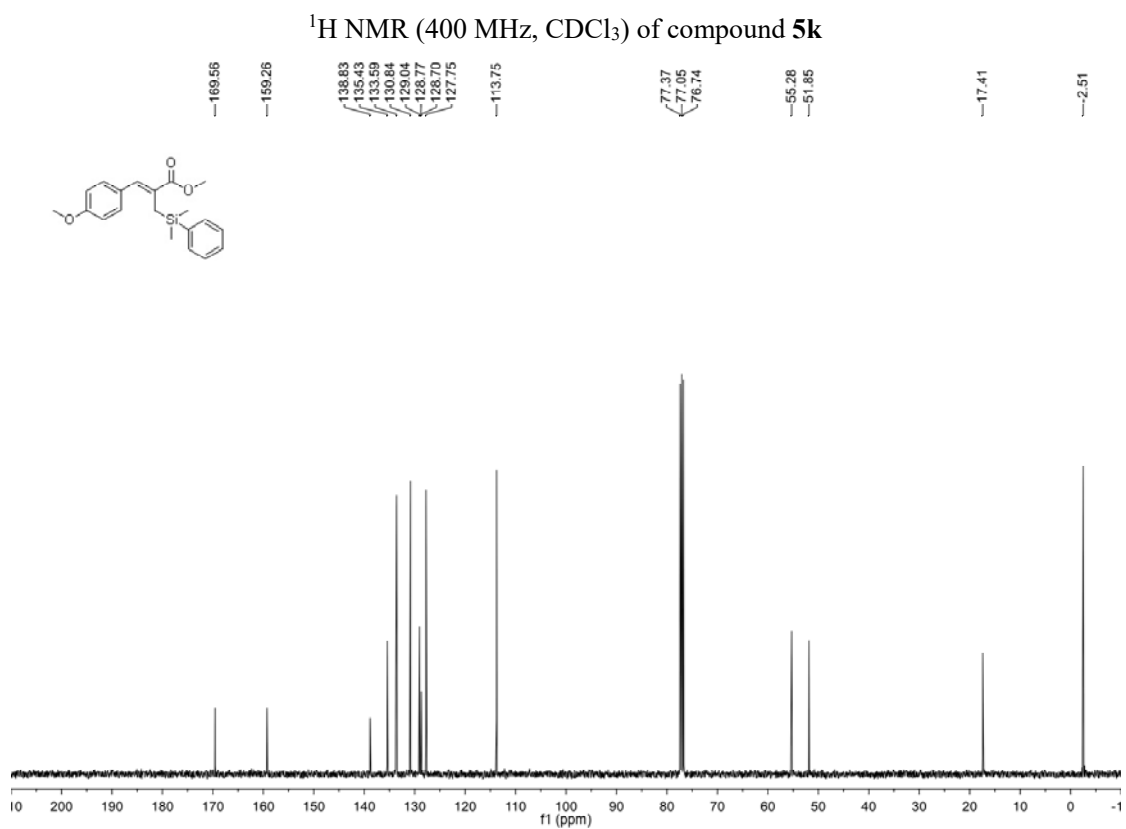

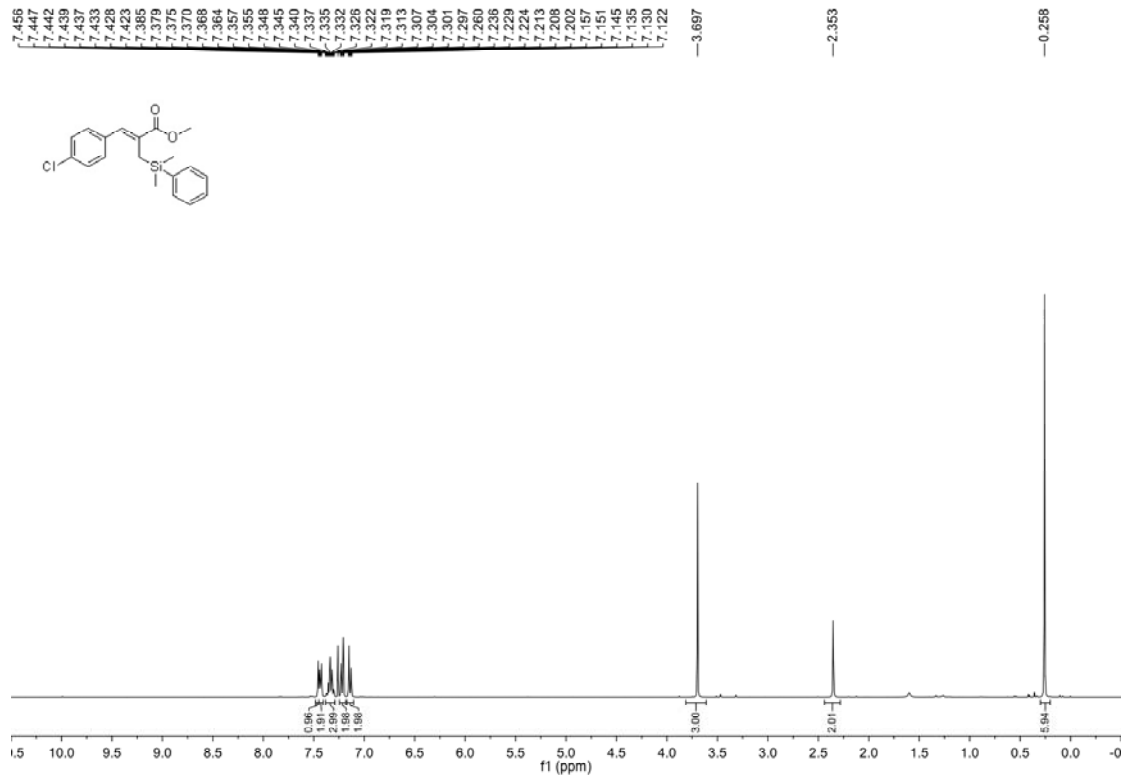

$^1\text{H}$  NMR (400 MHz,  $\text{CDCl}_3$ ) of compound **51**

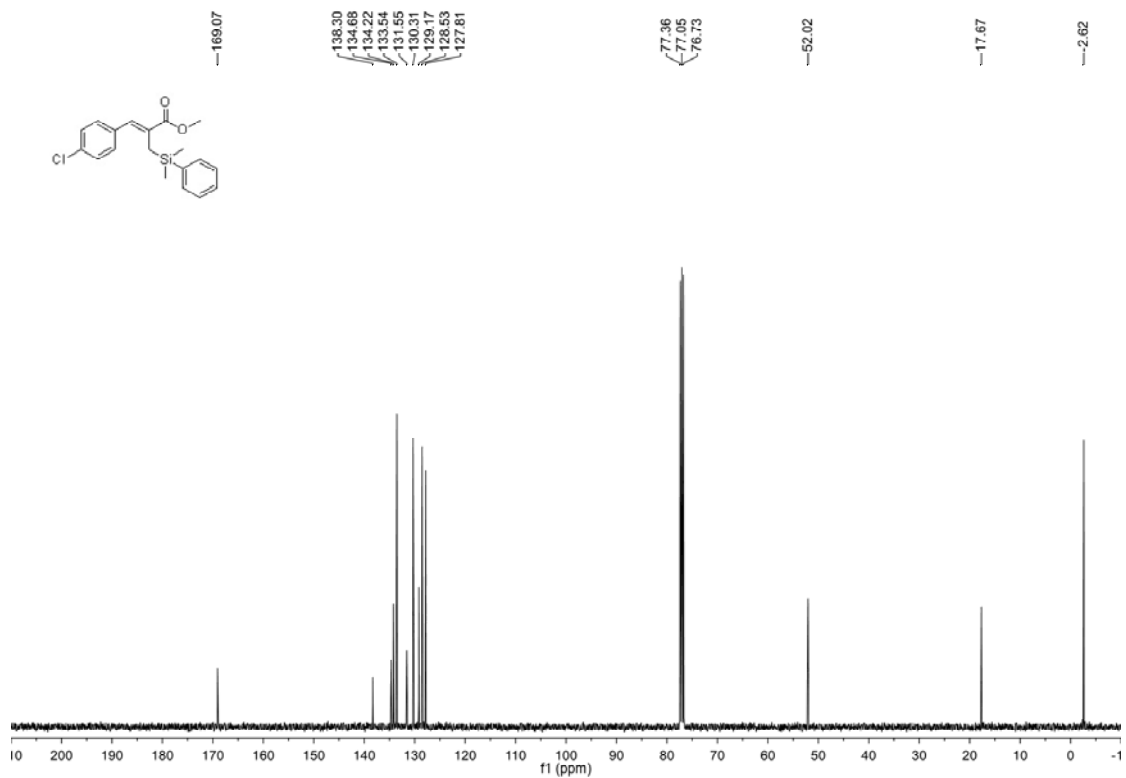

$^{13}\text{C}\{^1\text{H}\}$  NMR (100 MHz,  $\text{CDCl}_3$ ) of compound **51**

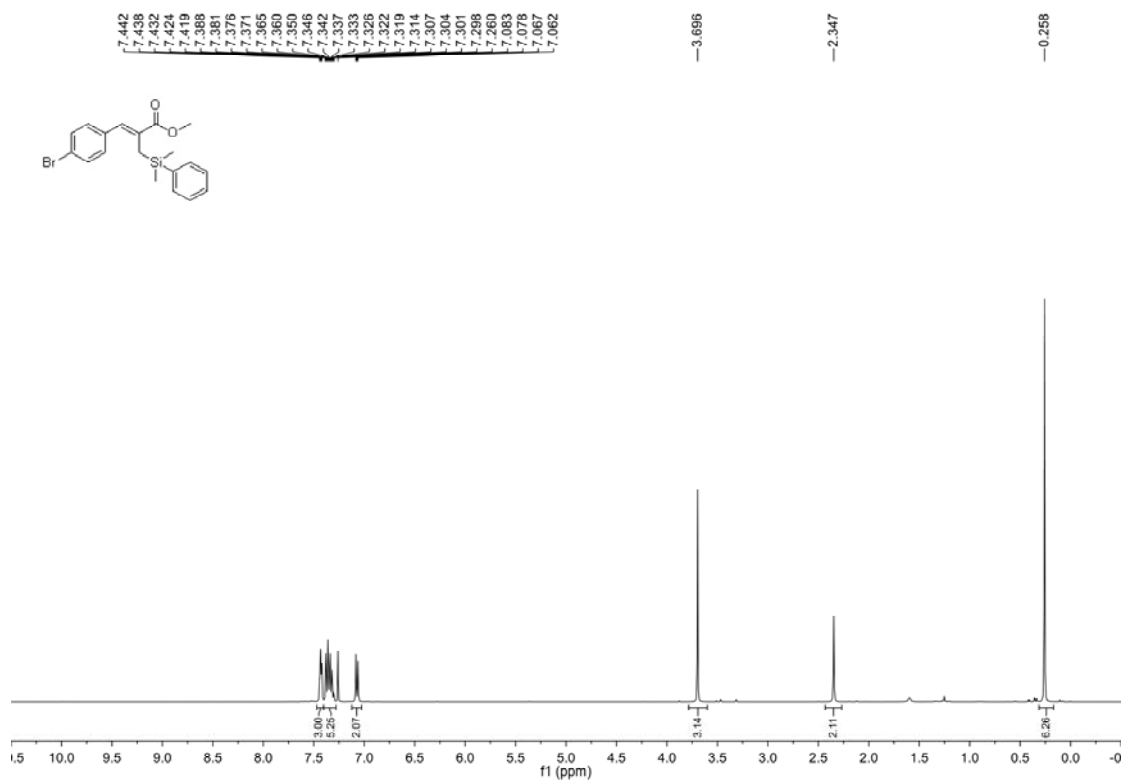

$^1\text{H}$  NMR (400 MHz,  $\text{CDCl}_3$ ) of compound **5m**

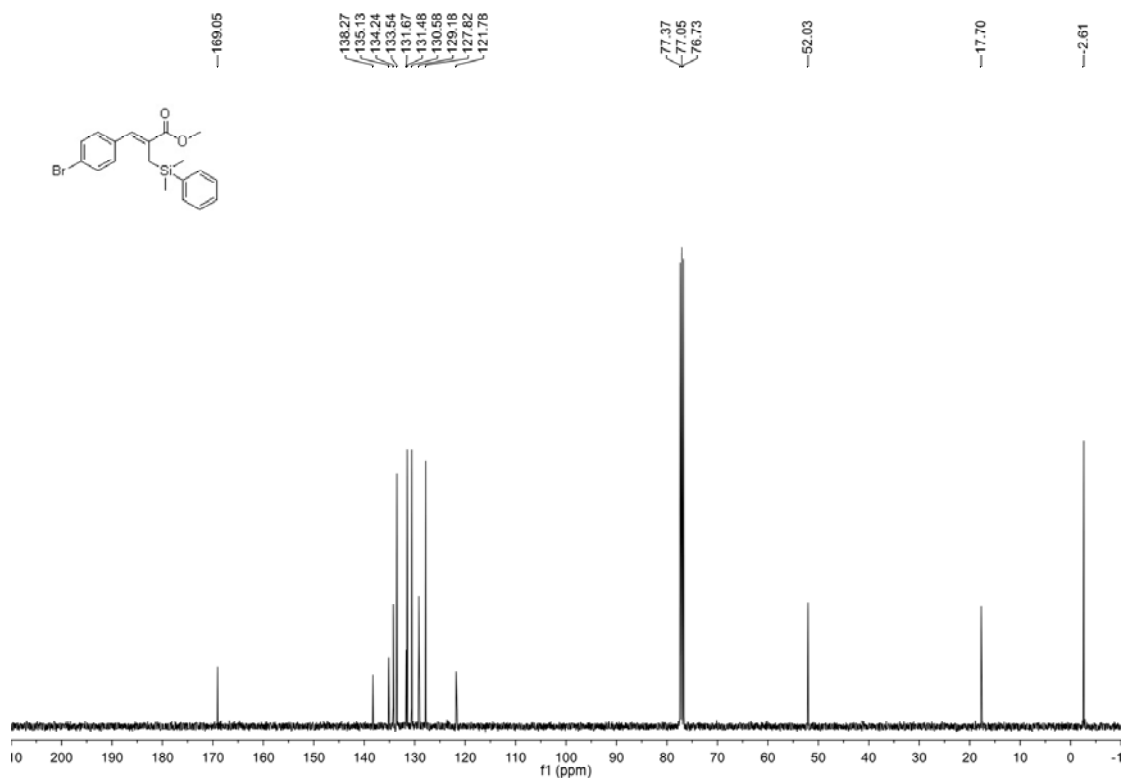

$^{13}\text{C}\{^1\text{H}\}$  NMR (100 MHz,  $\text{CDCl}_3$ ) of compound **5m**

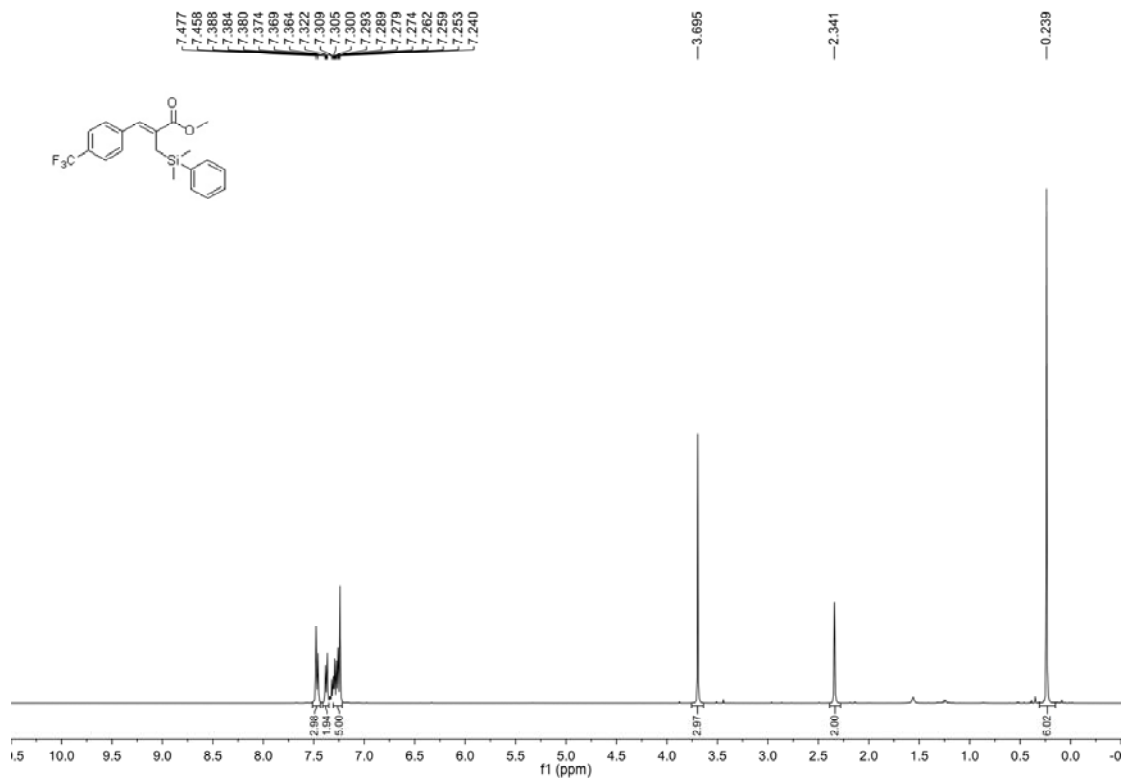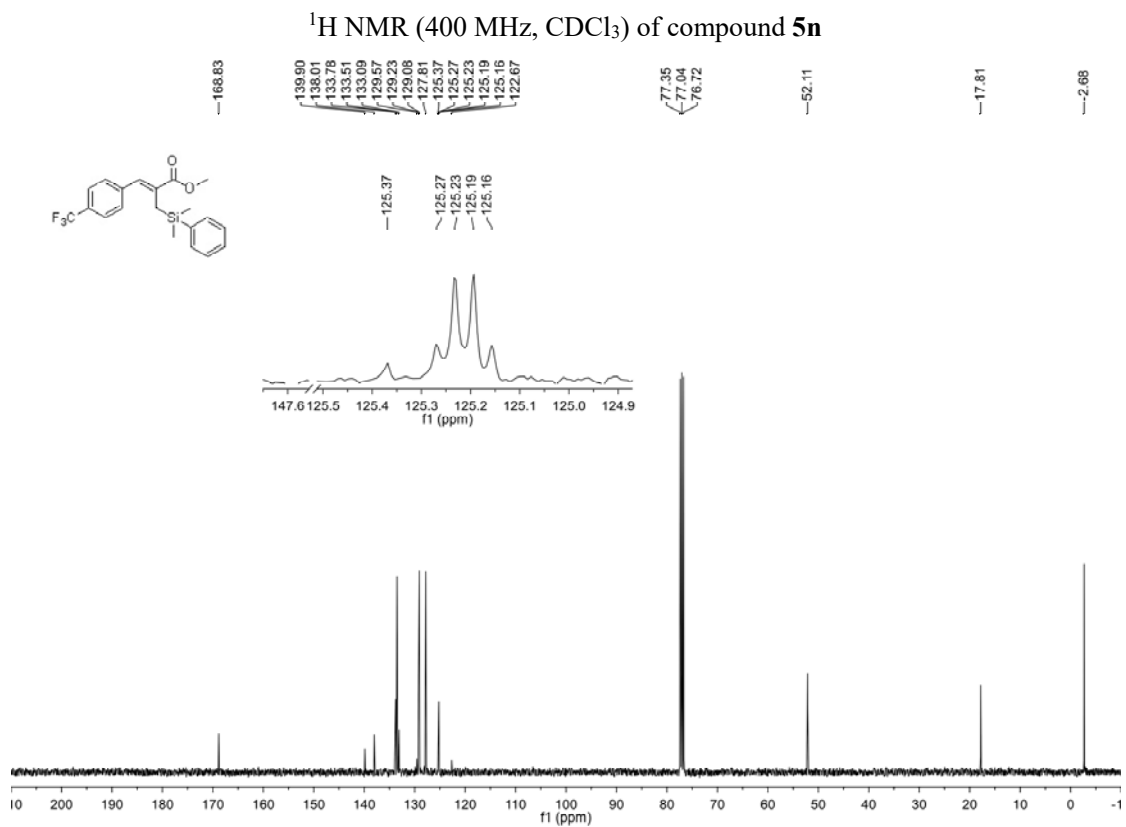



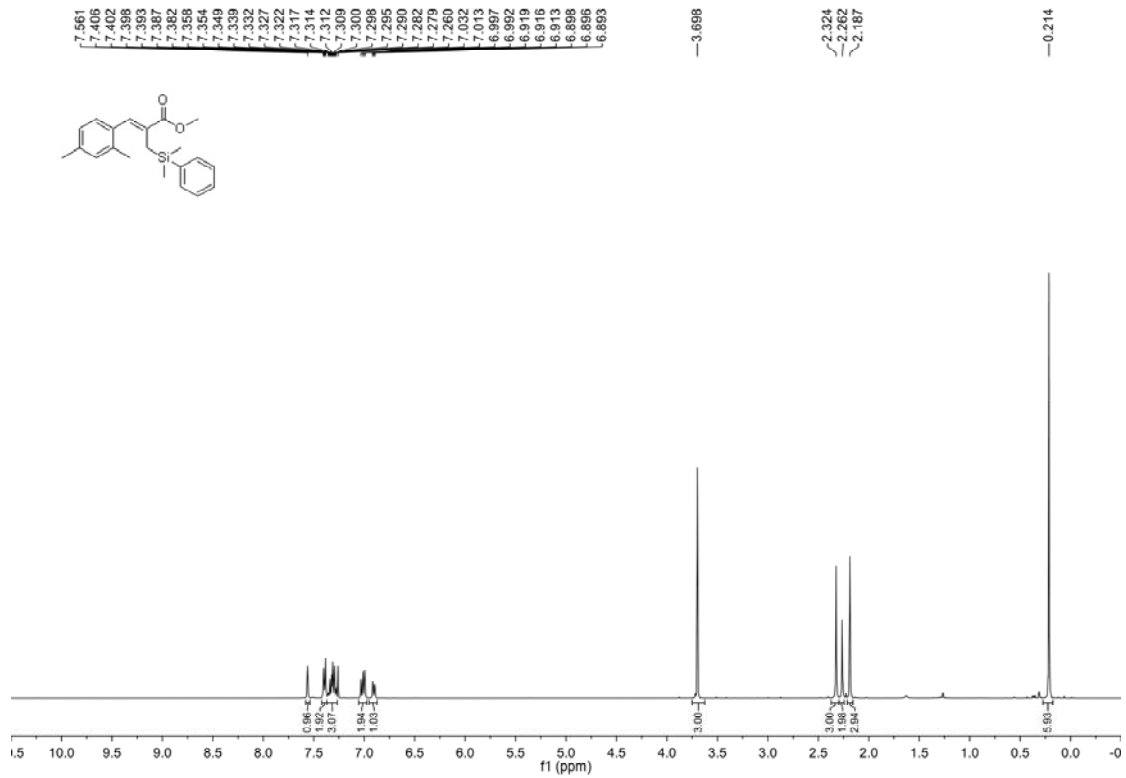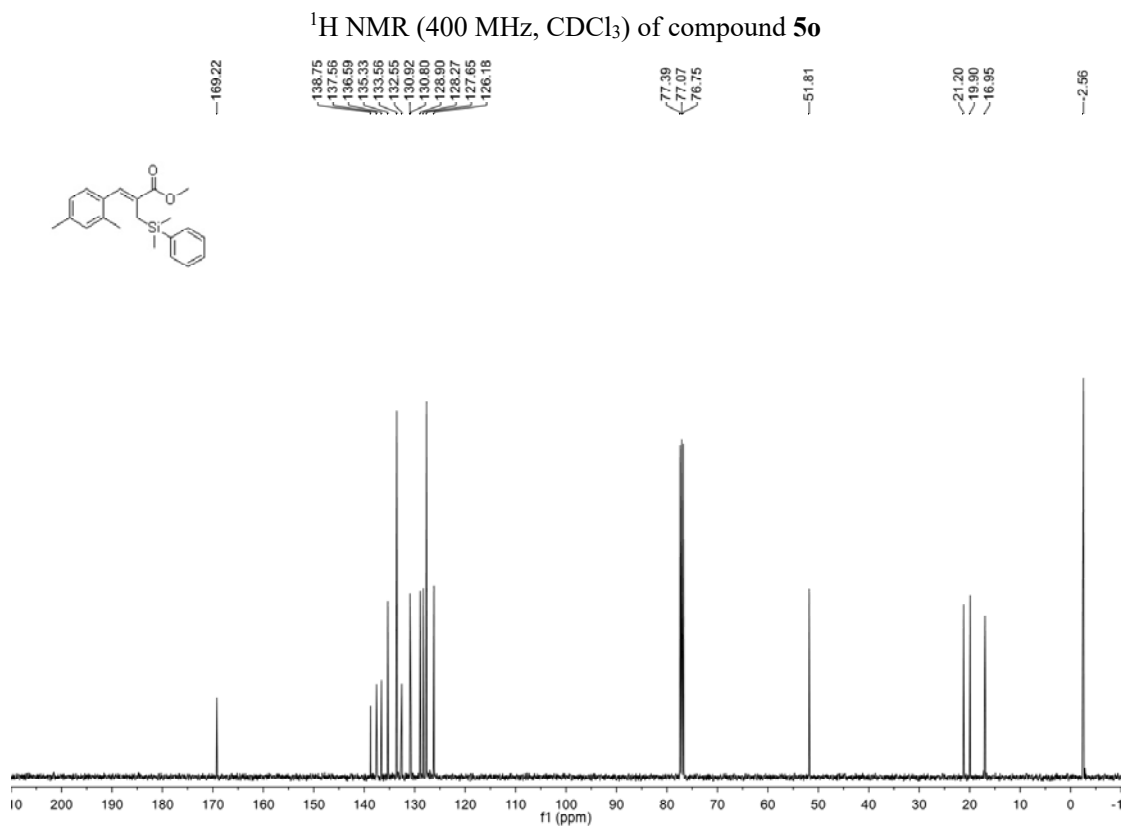

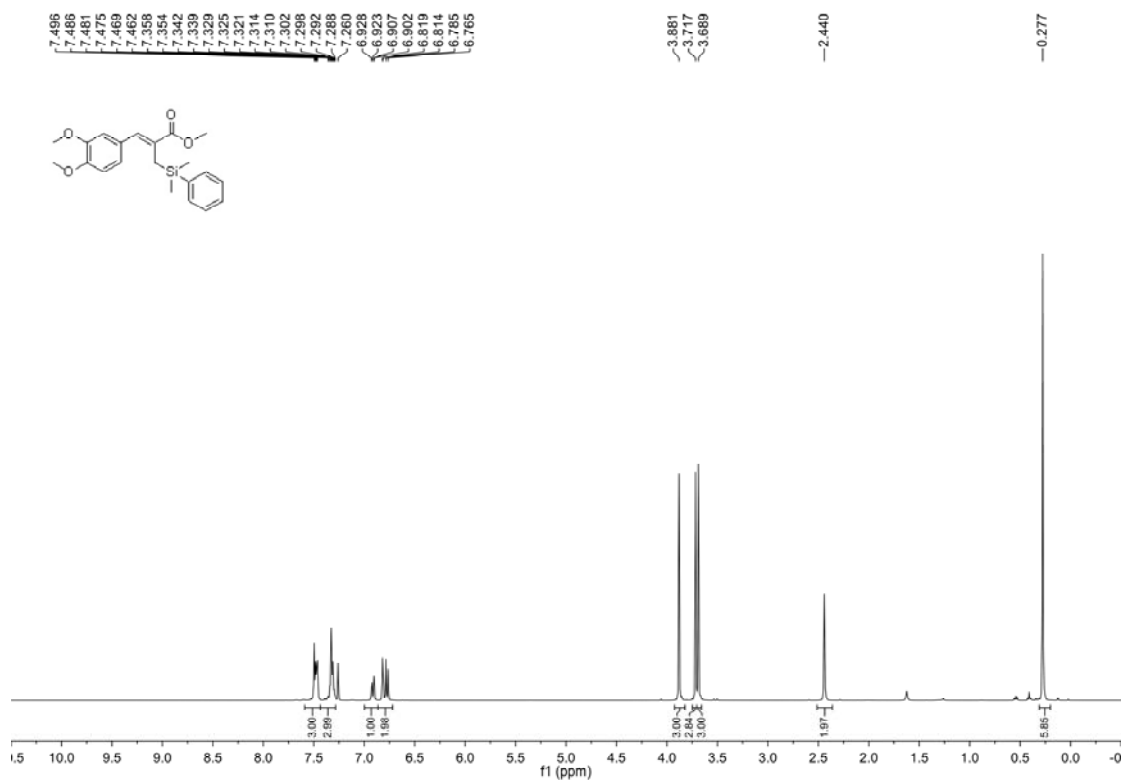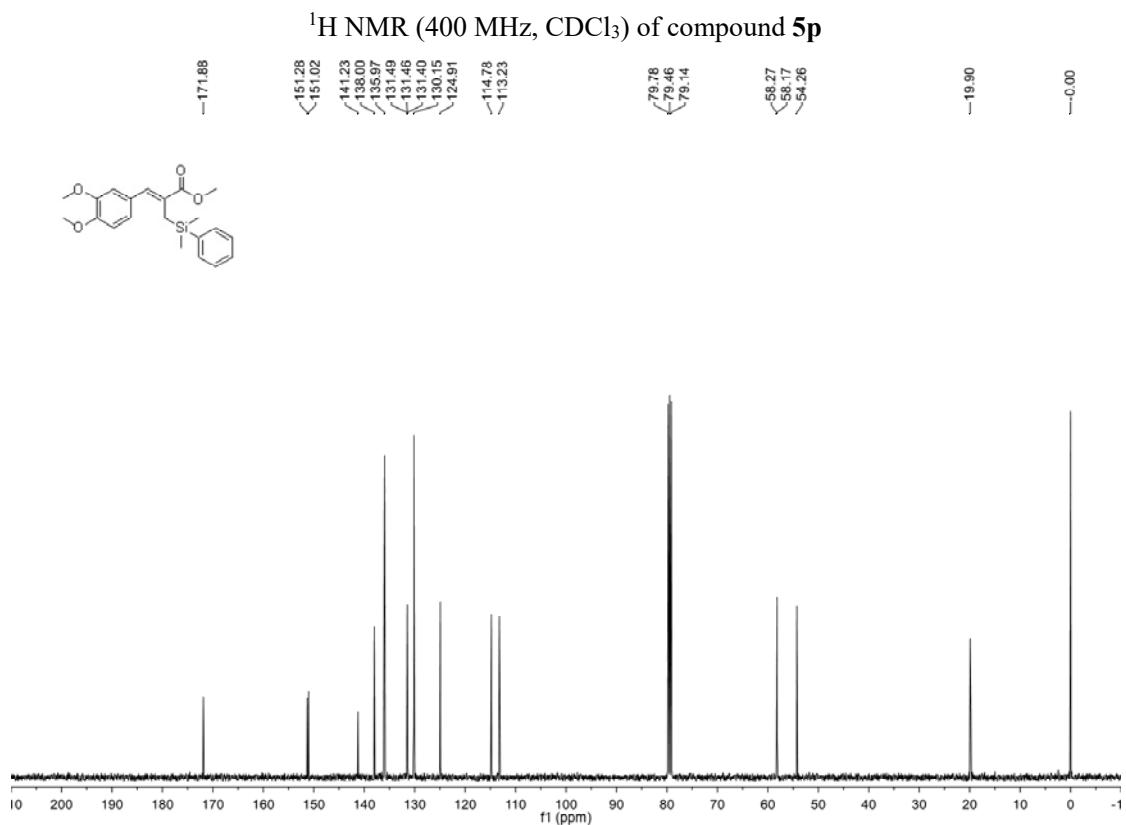

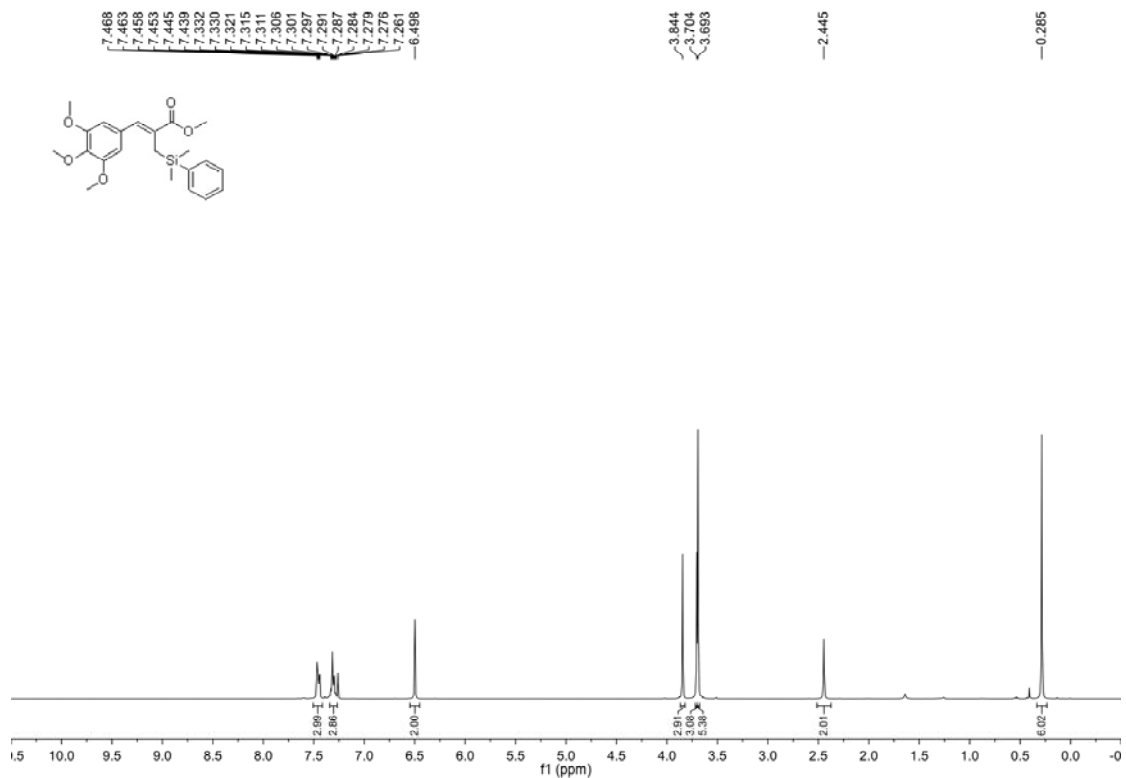

$^1\text{H}$  NMR (400 MHz,  $\text{CDCl}_3$ ) of compound **5q**

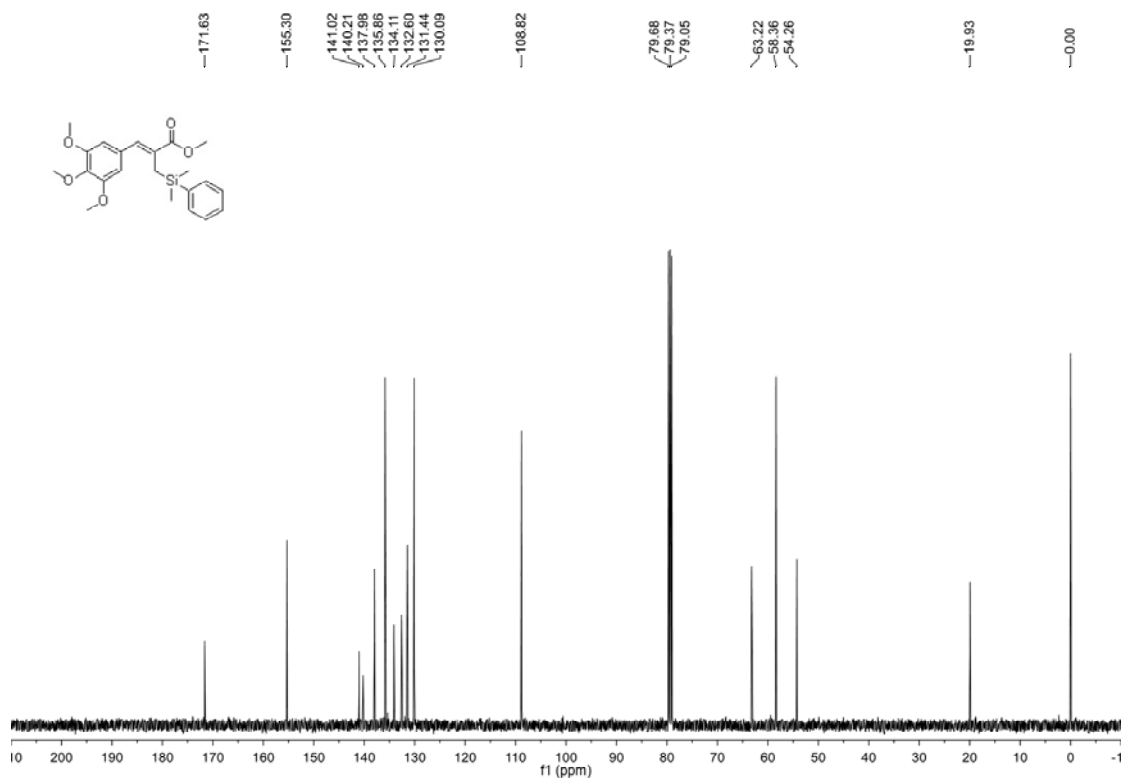

$^{13}\text{C}\{^1\text{H}\}$  NMR (100 MHz,  $\text{CDCl}_3$ ) of compound **5q**

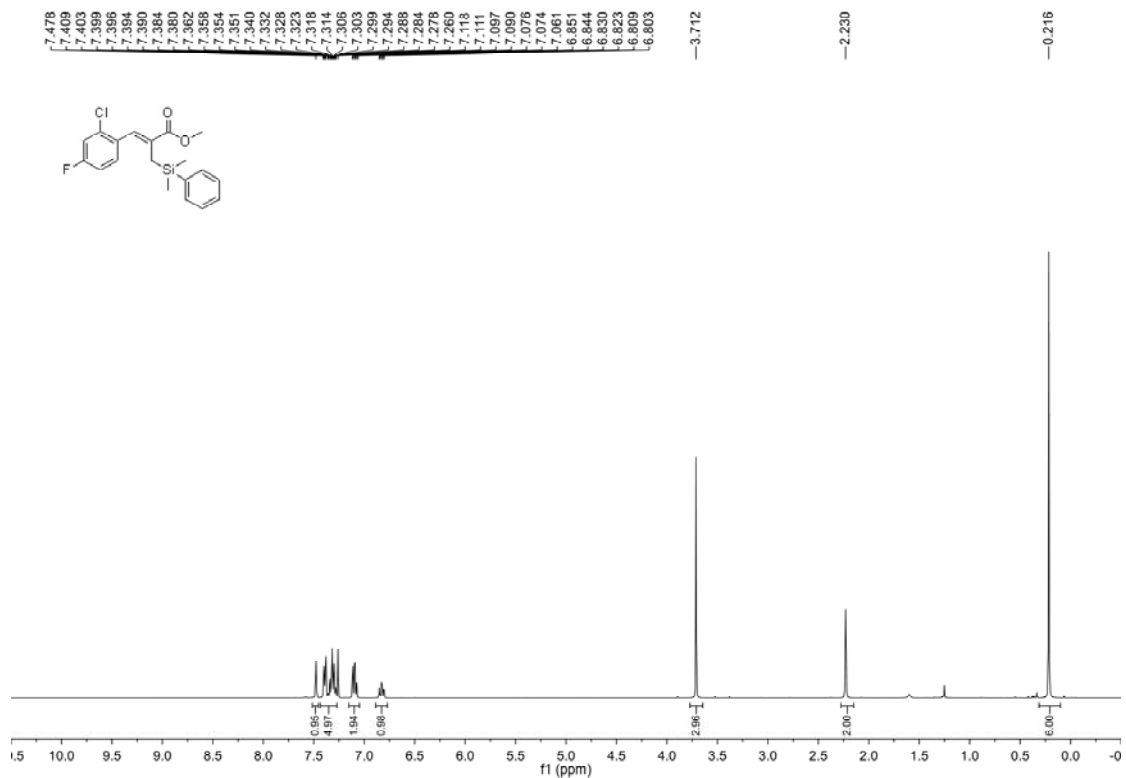

$^1\text{H NMR}$  (400 MHz,  $\text{CDCl}_3$ ) of compound **5r**

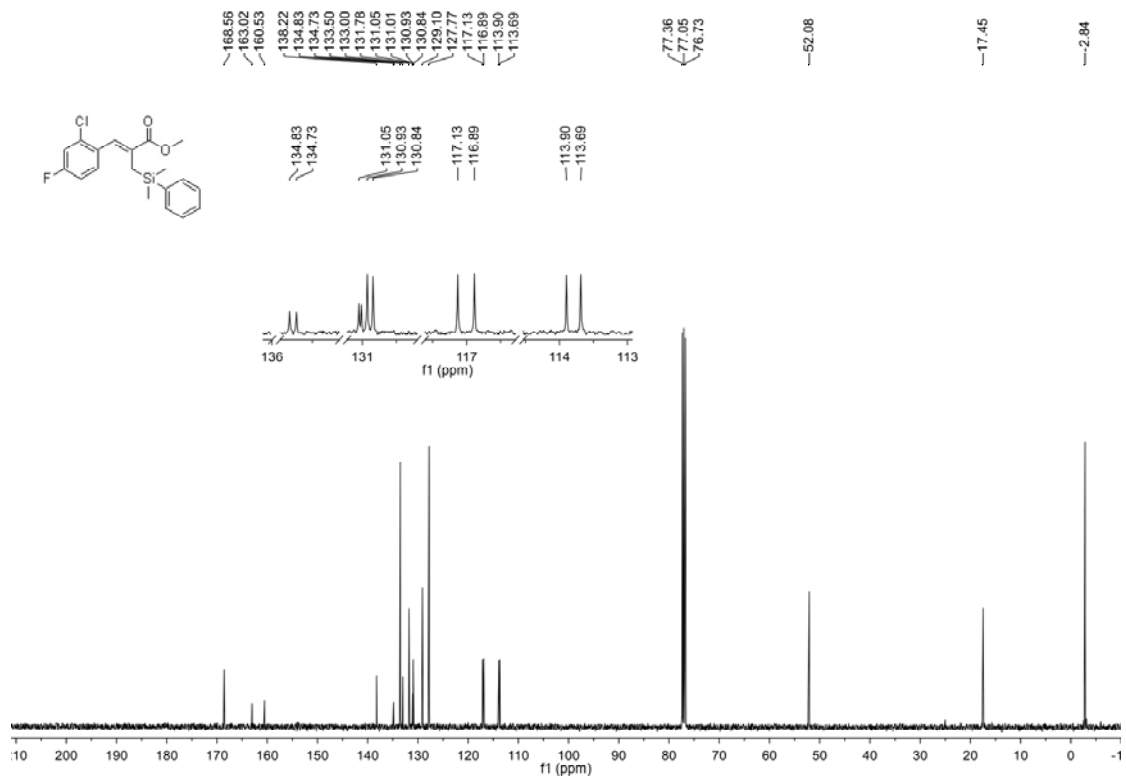

$^{13}\text{C}\{^1\text{H}\}$  NMR (100 MHz,  $\text{CDCl}_3$ ) of compound **5r**

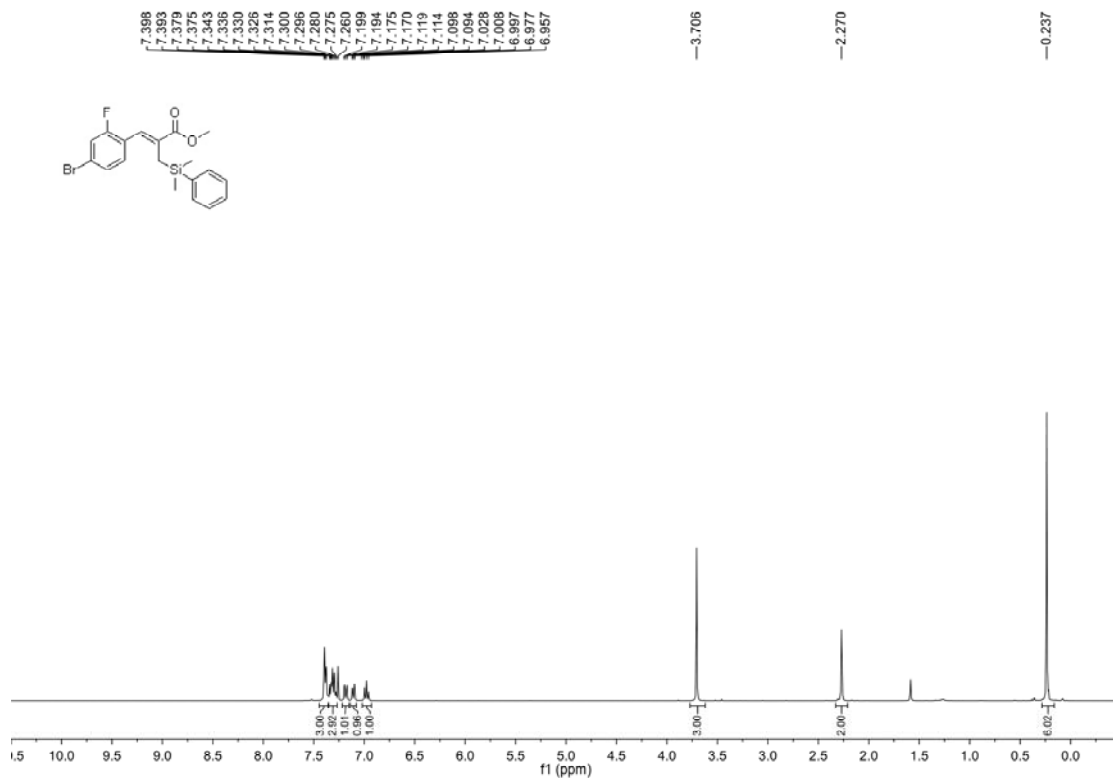

$^1\text{H}$  NMR (400 MHz,  $\text{CDCl}_3$ ) of compound **5s**

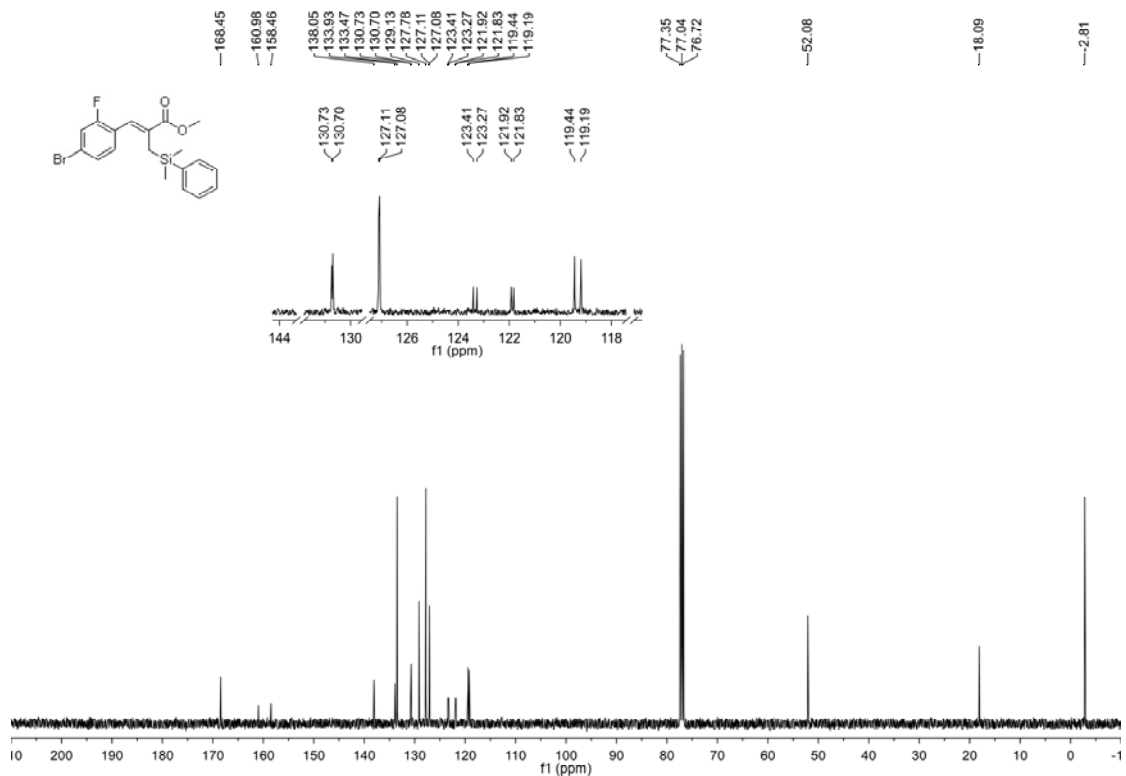

$^{13}\text{C}\{^1\text{H}\}$  NMR (100 MHz,  $\text{CDCl}_3$ ) of compound **5s**

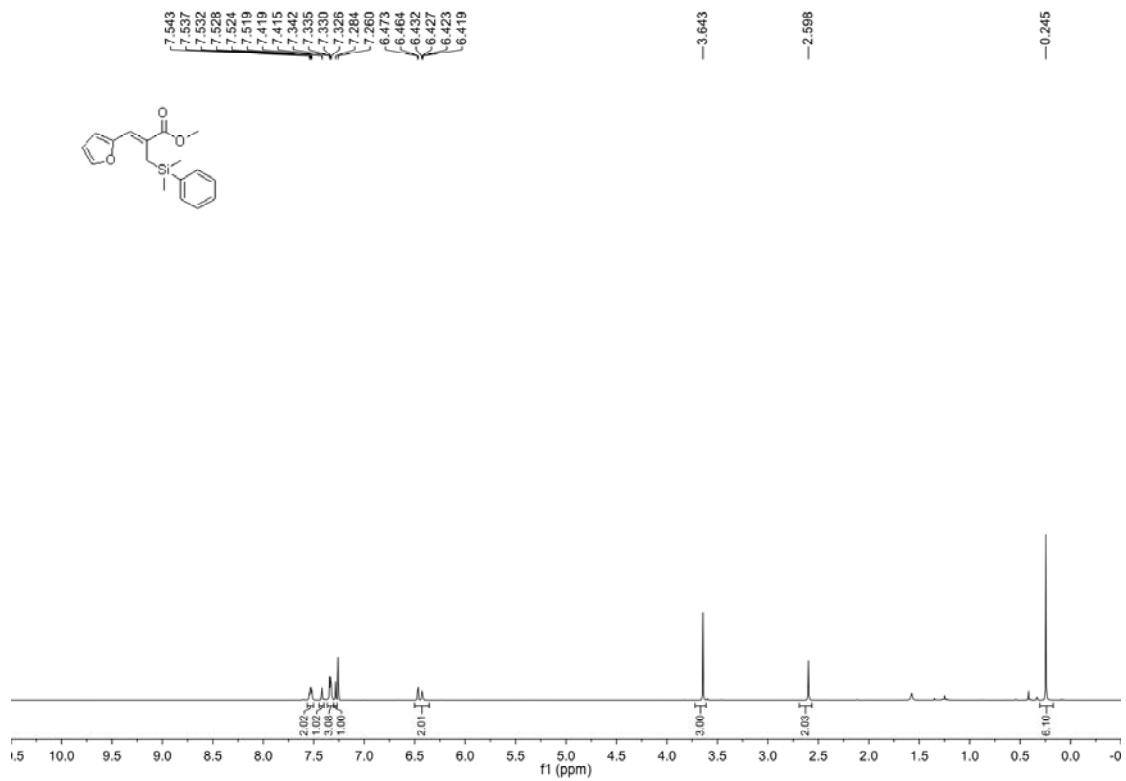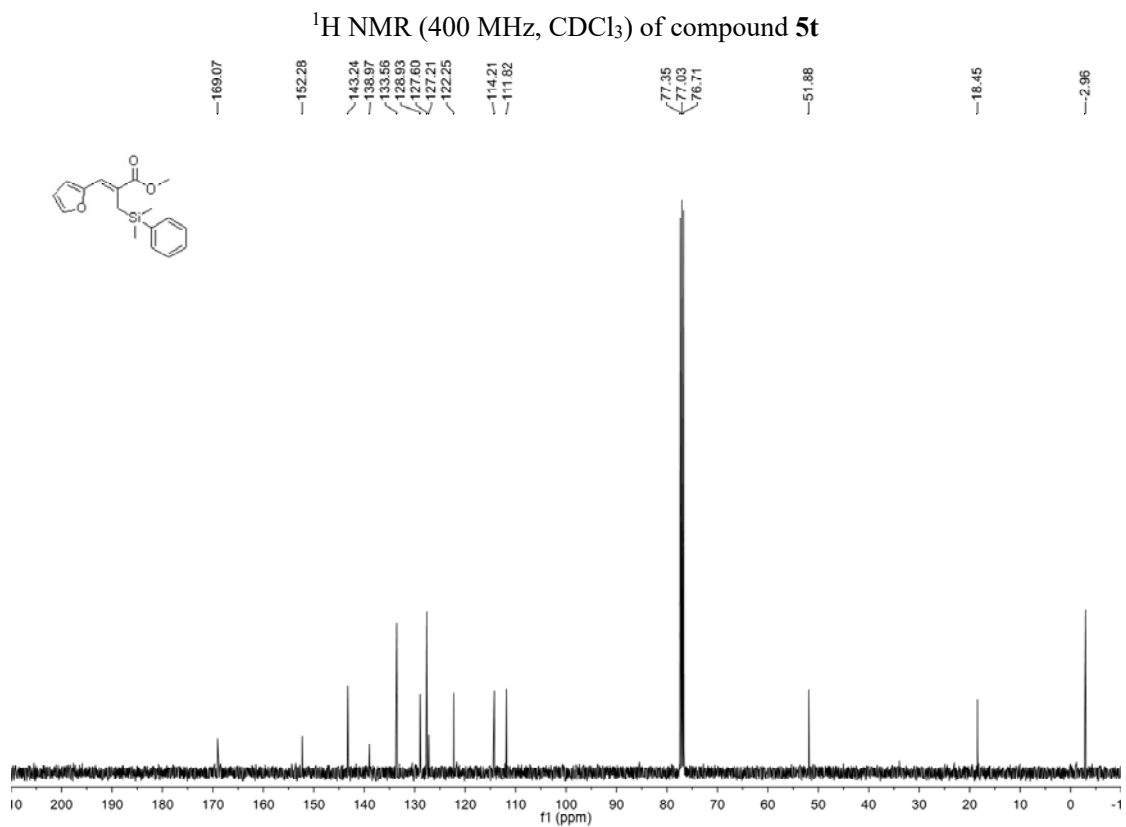

$^{13}\text{C}\{^1\text{H}\}$  NMR (100 MHz,  $\text{CDCl}_3$ ) of compound **5t**

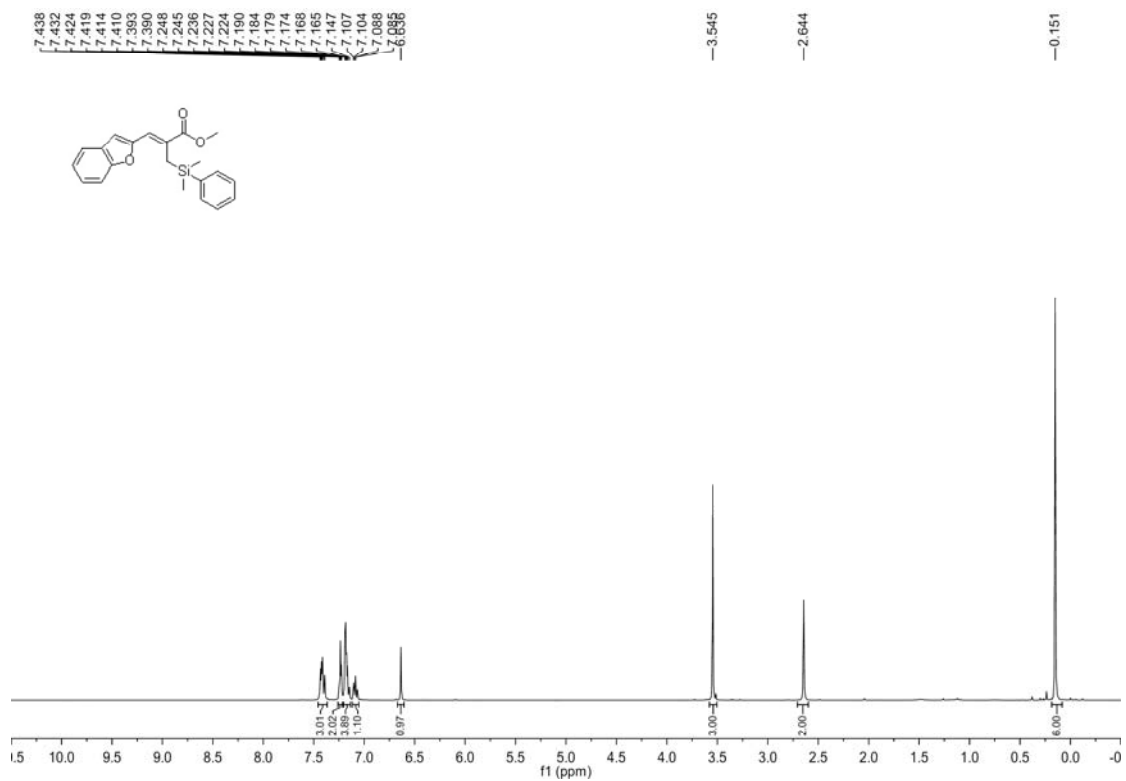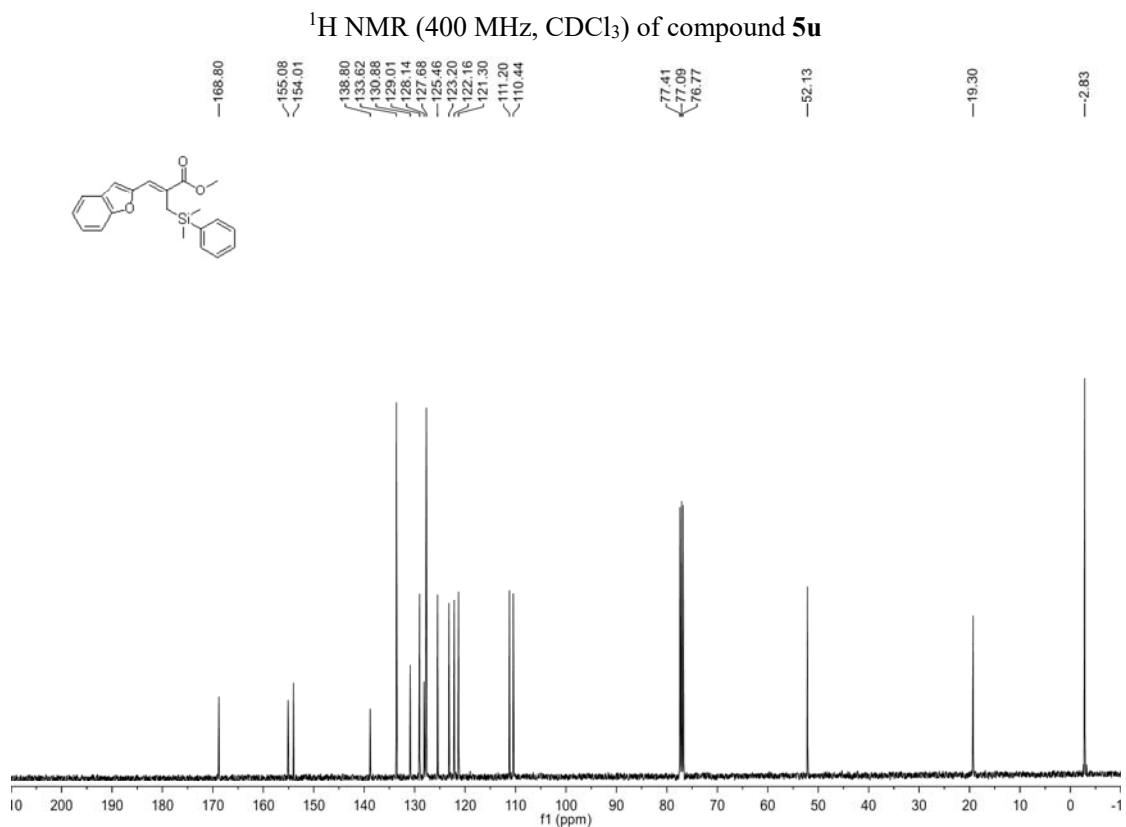

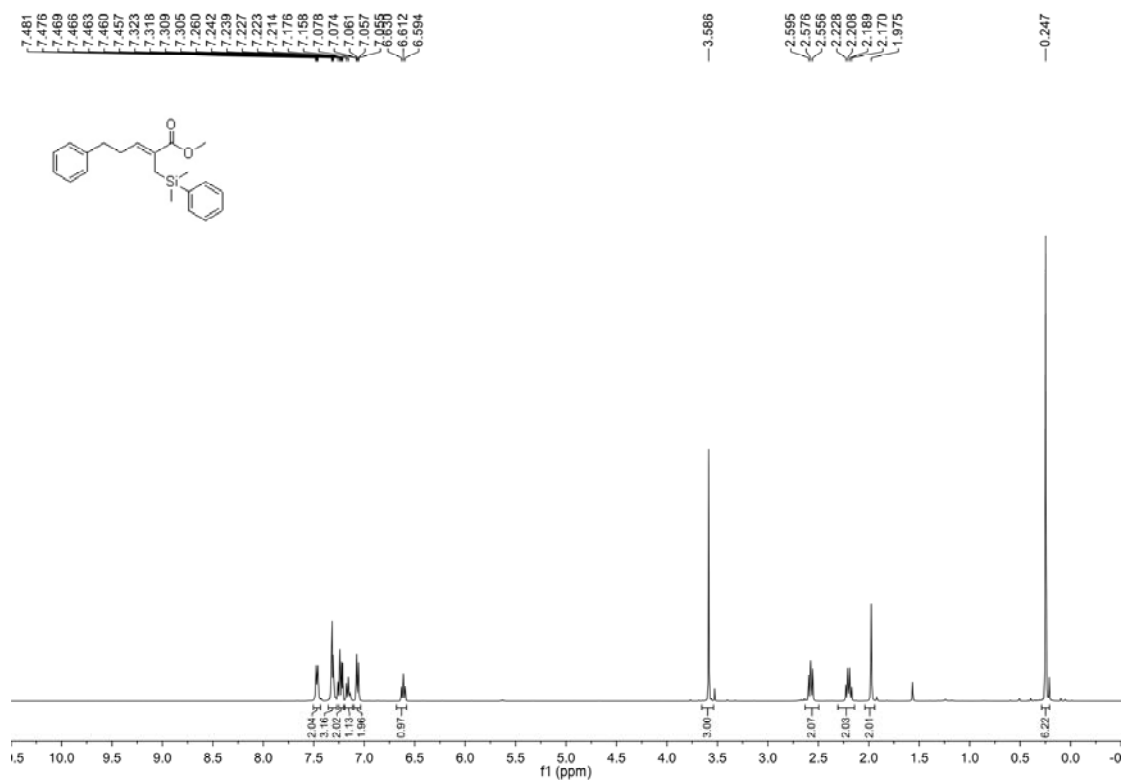

$^1\text{H}$  NMR (400 MHz,  $\text{CDCl}_3$ ) of compound **5v**

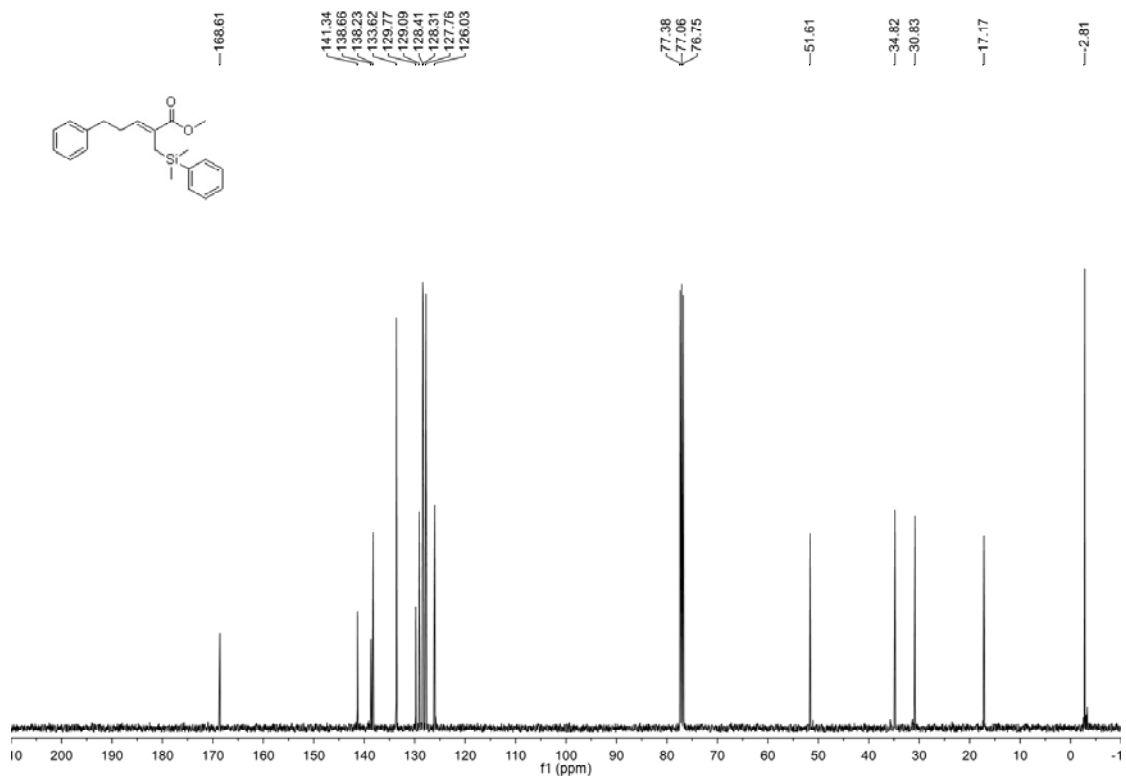

$^{13}\text{C}$  NMR (100 MHz,  $\text{CDCl}_3$ ) of compound **5v**



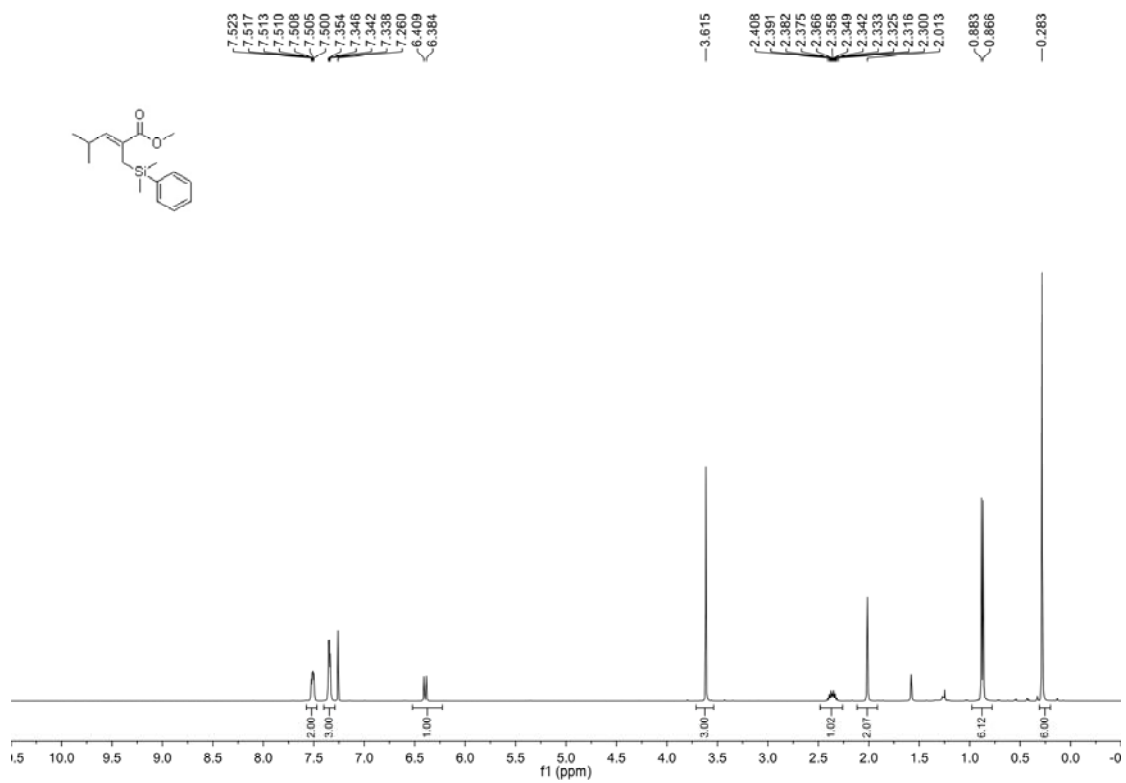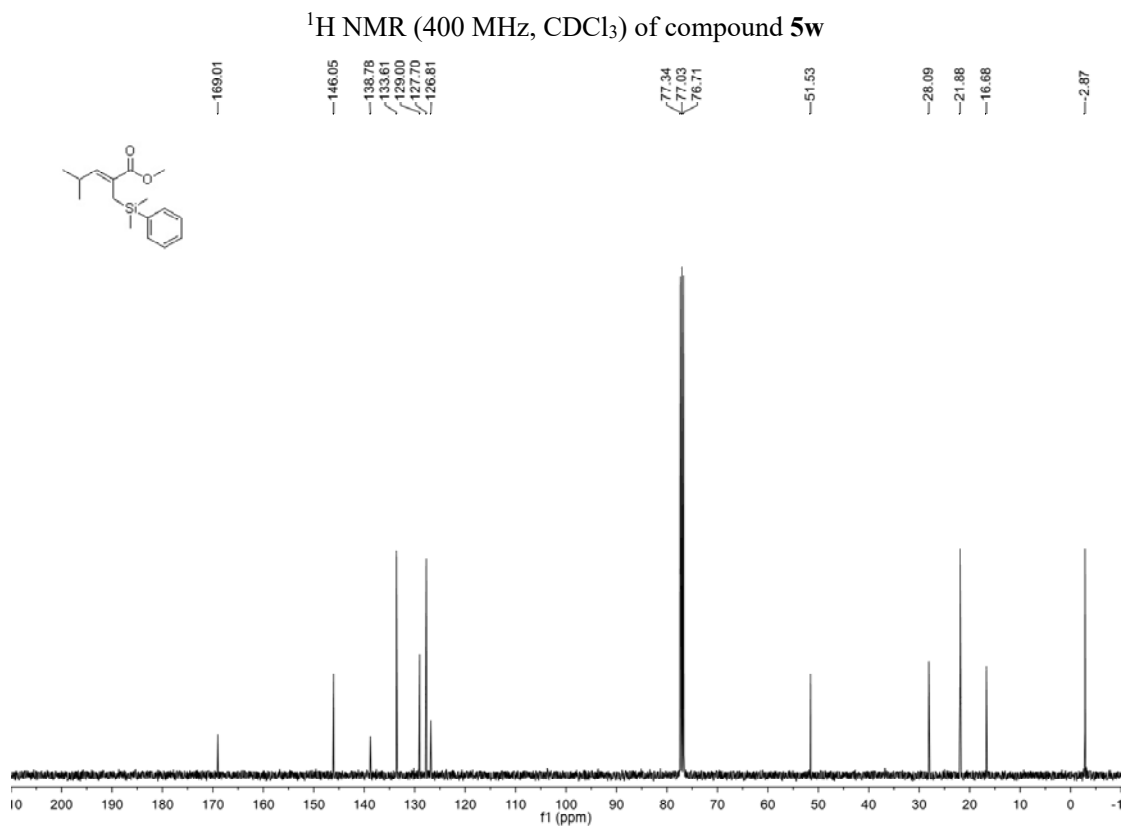

$^{13}\text{C}\{^1\text{H}\}$  NMR (100 MHz,  $\text{CDCl}_3$ ) of compound **5w**

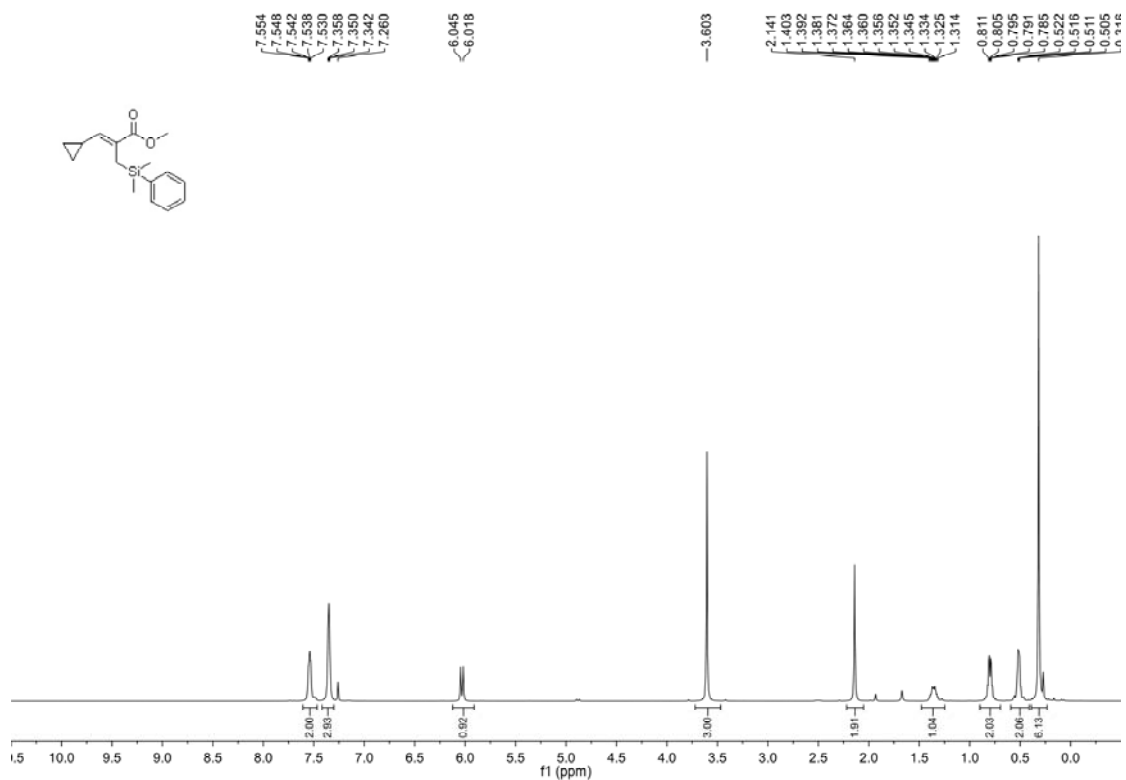

<sup>1</sup>H NMR (400 MHz, CDCl<sub>3</sub>) of compound **5x**

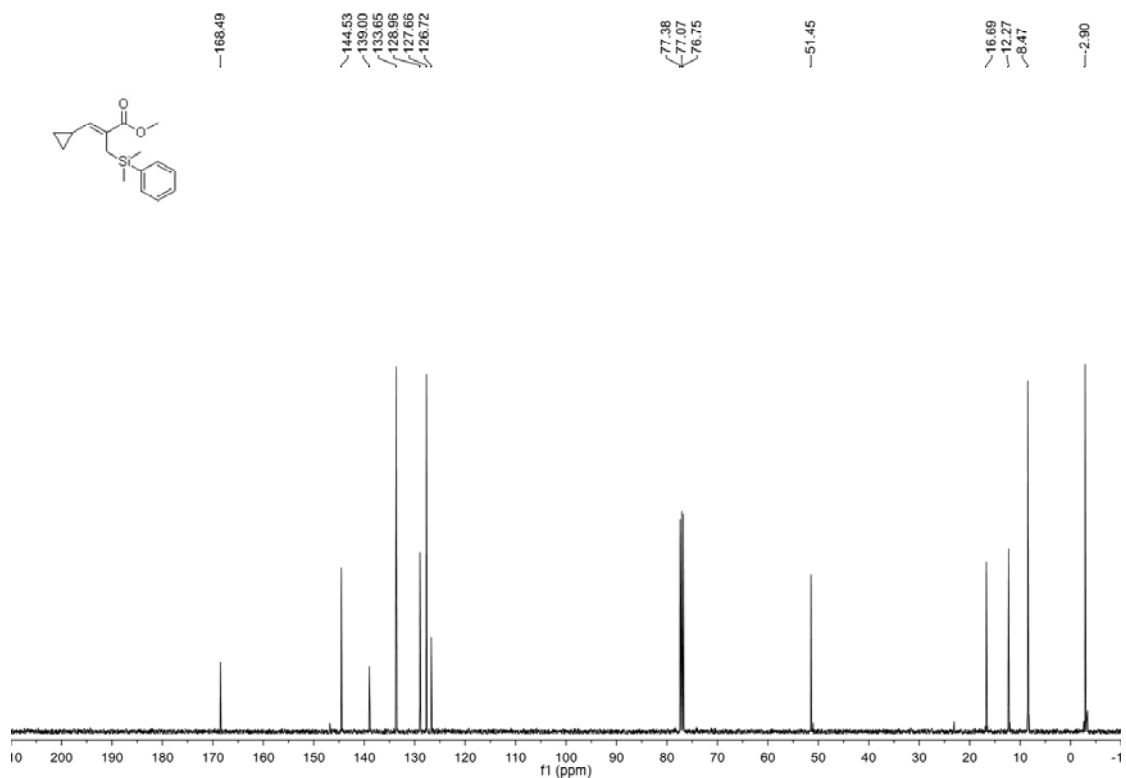

<sup>13</sup>C NMR (100 MHz, CDCl<sub>3</sub>) of compound **5x**

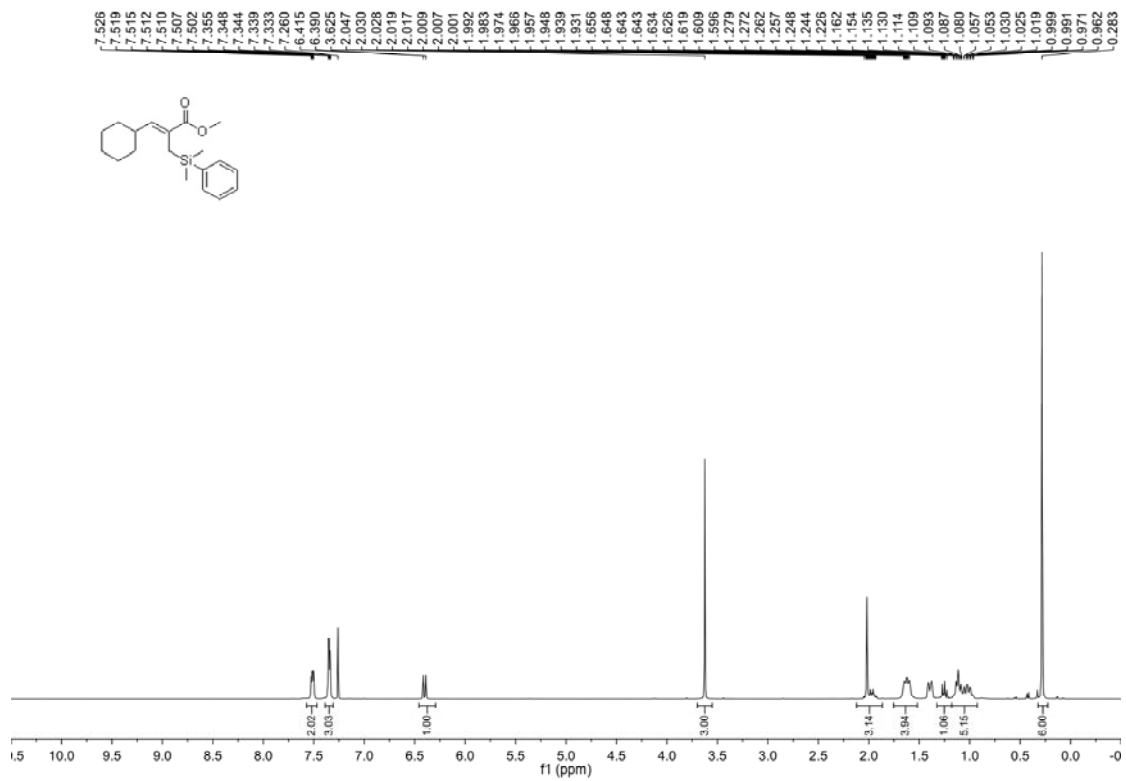

$^1\text{H}$  NMR (400 MHz,  $\text{CDCl}_3$ ) of compound **5y**

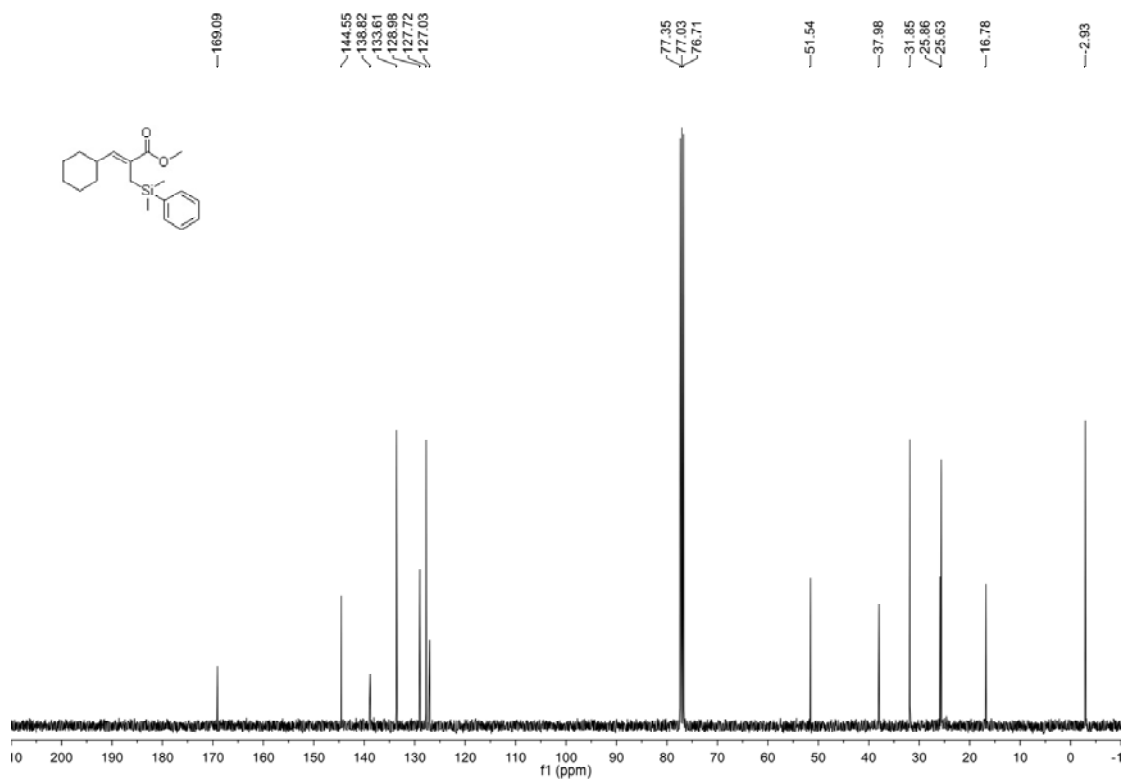

$^{13}\text{C}\{^1\text{H}\}$  NMR (100 MHz,  $\text{CDCl}_3$ ) of compound **5y**

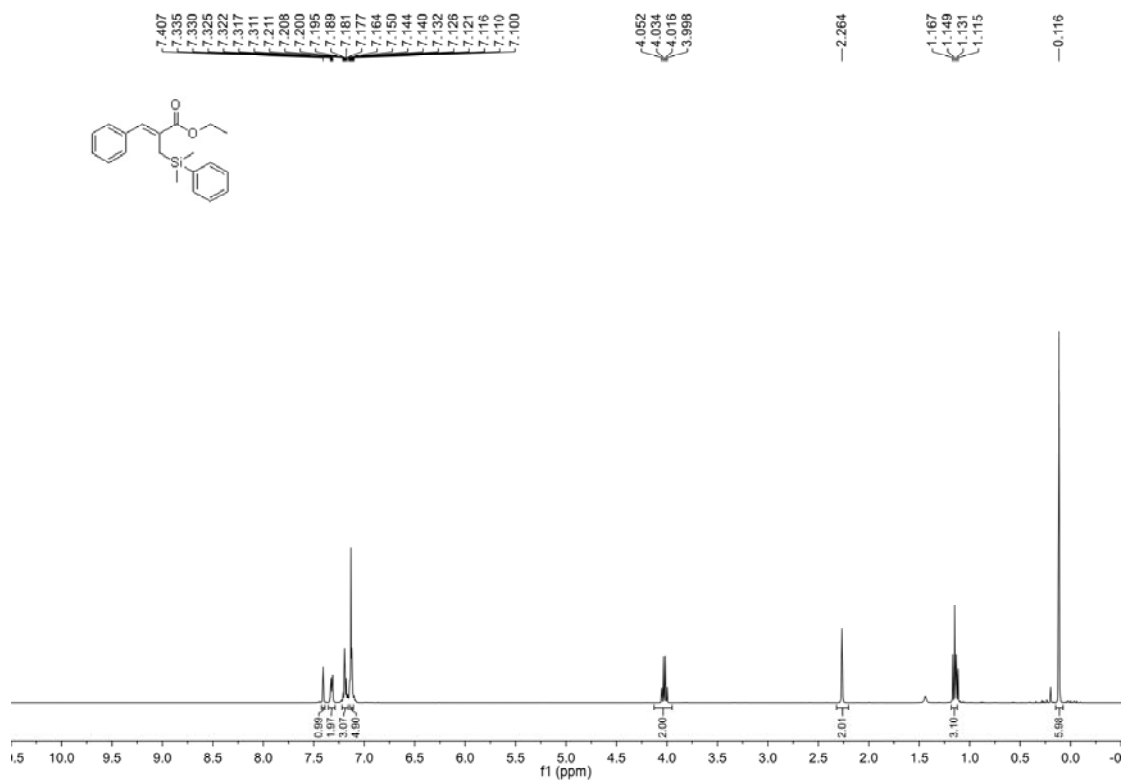

$^1\text{H}$  NMR (400 MHz,  $\text{CDCl}_3$ ) of compound **5z**

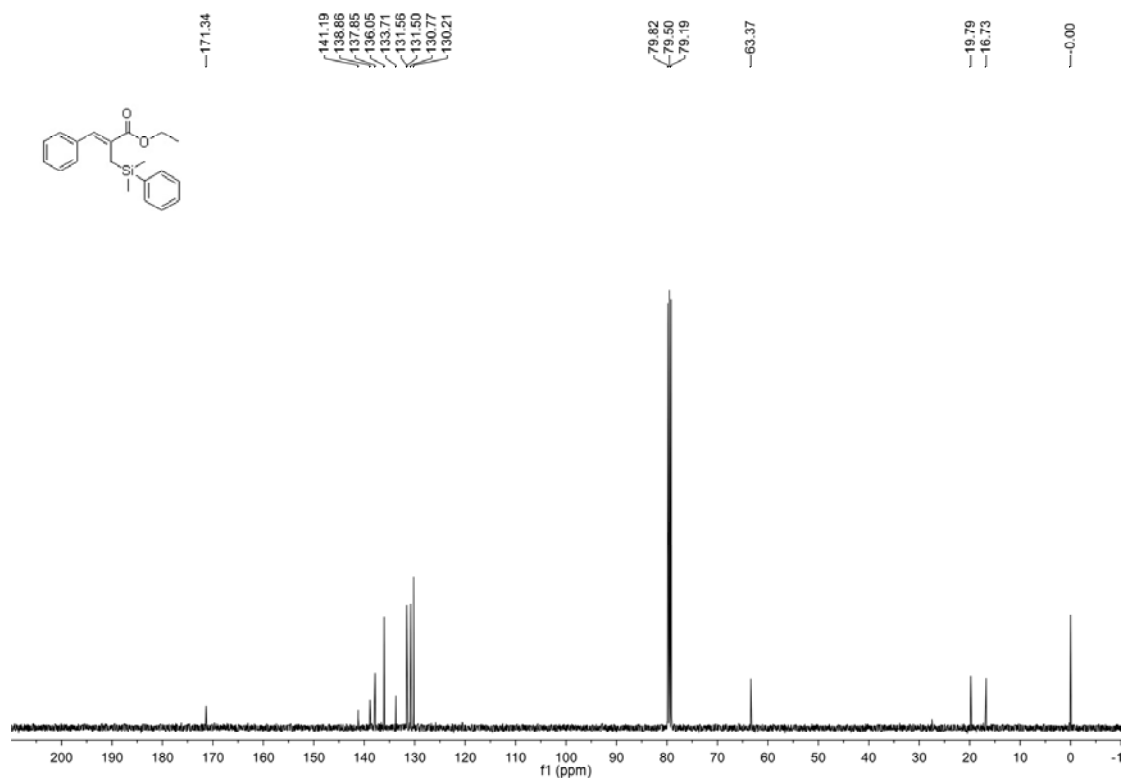

$^{13}\text{C}$  NMR (100 MHz,  $\text{CDCl}_3$ ) of compound **5z**

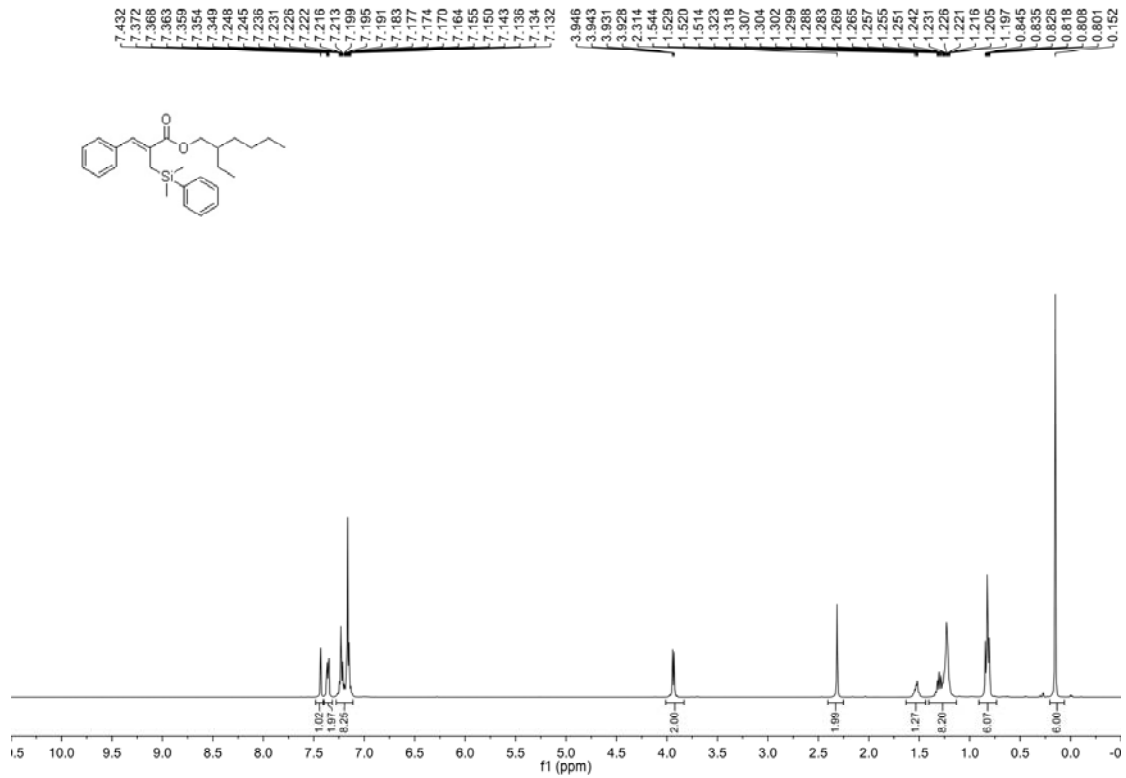

$^1\text{H}$  NMR (400 MHz,  $\text{CDCl}_3$ ) of compound 5A

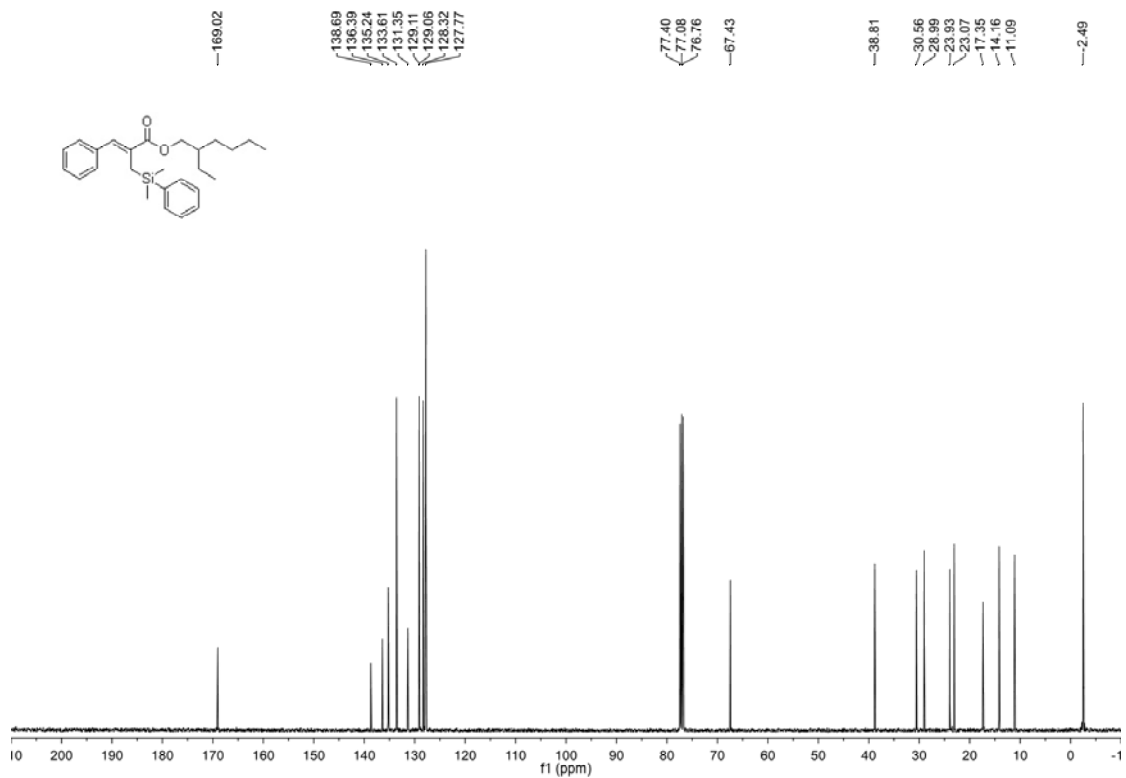

$^{13}\text{C}\{^1\text{H}\}$  NMR (100 MHz,  $\text{CDCl}_3$ ) of compound 5A

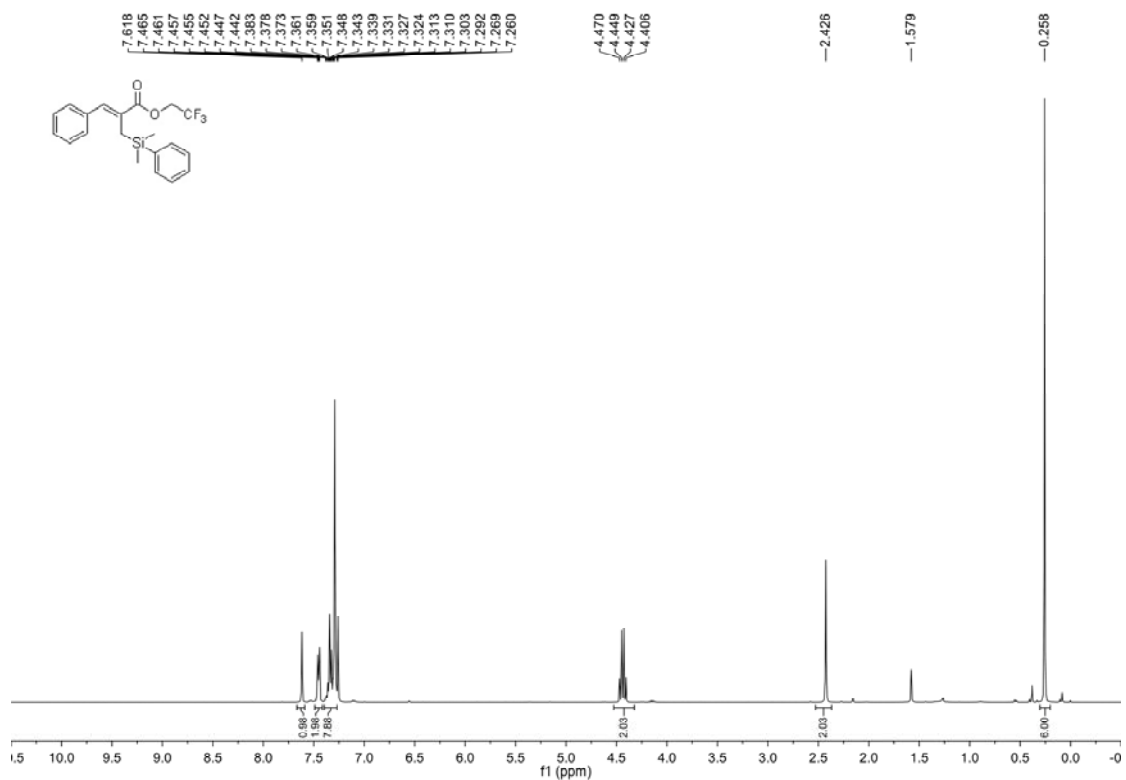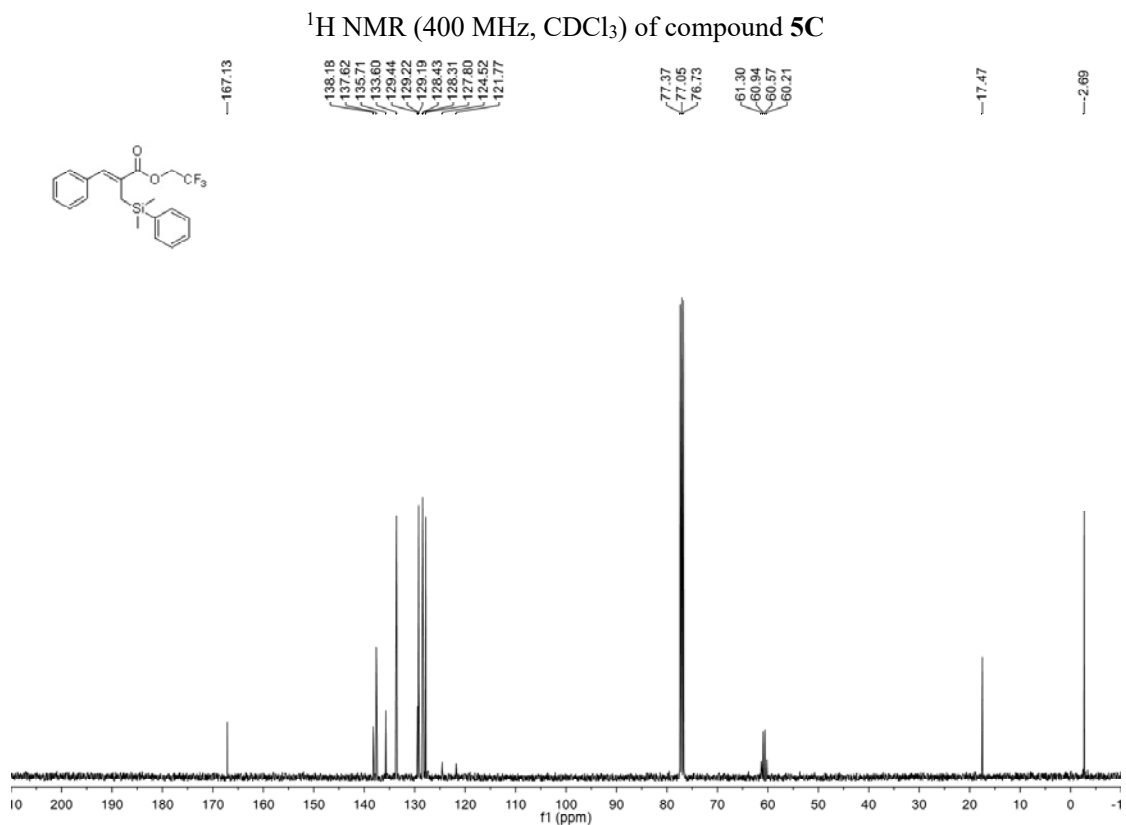

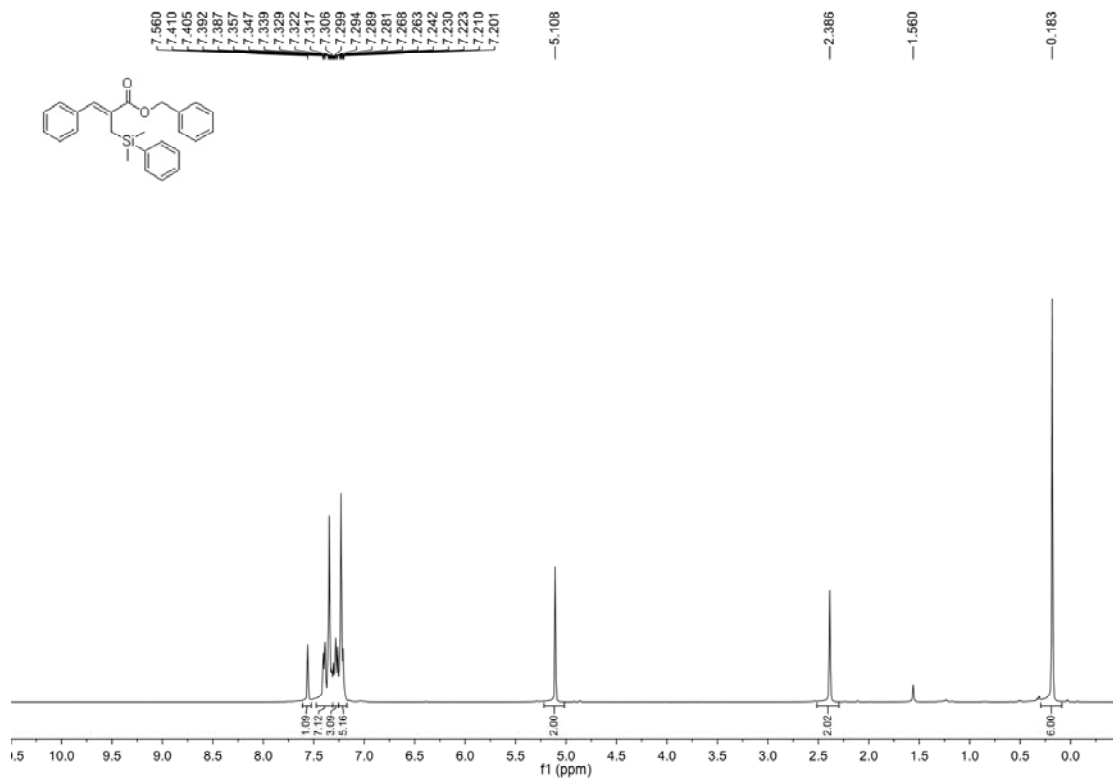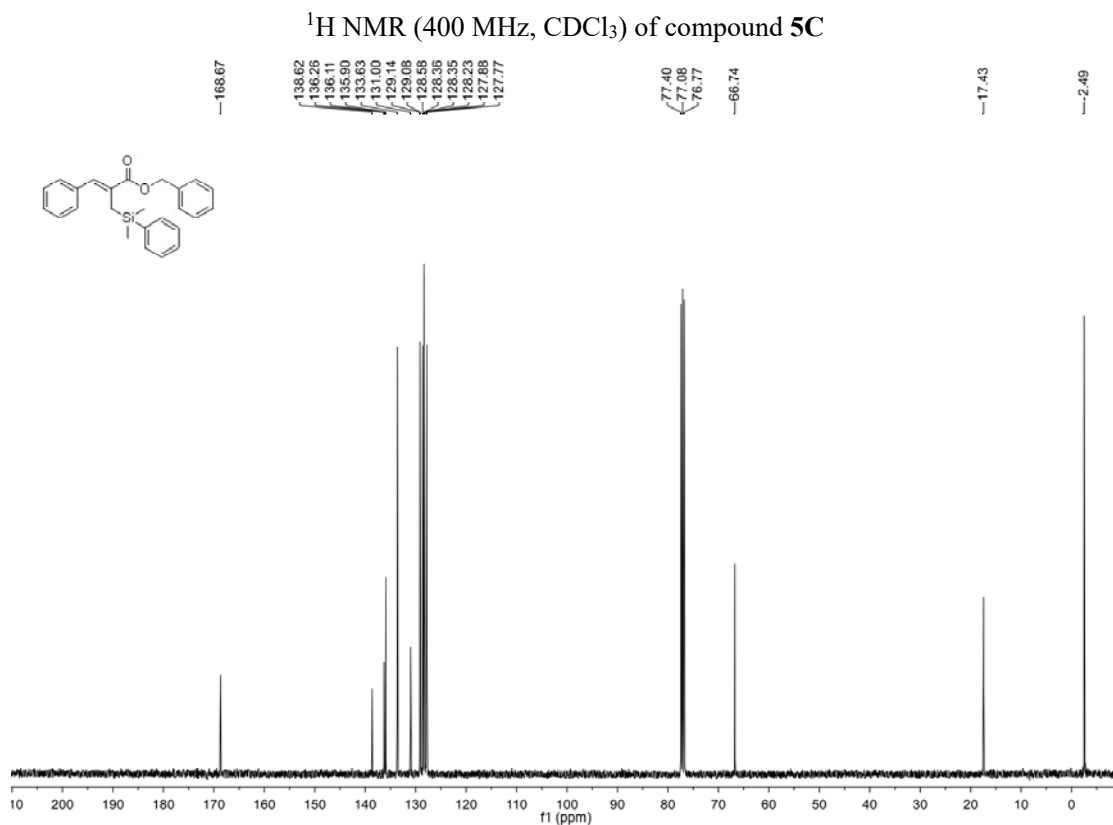

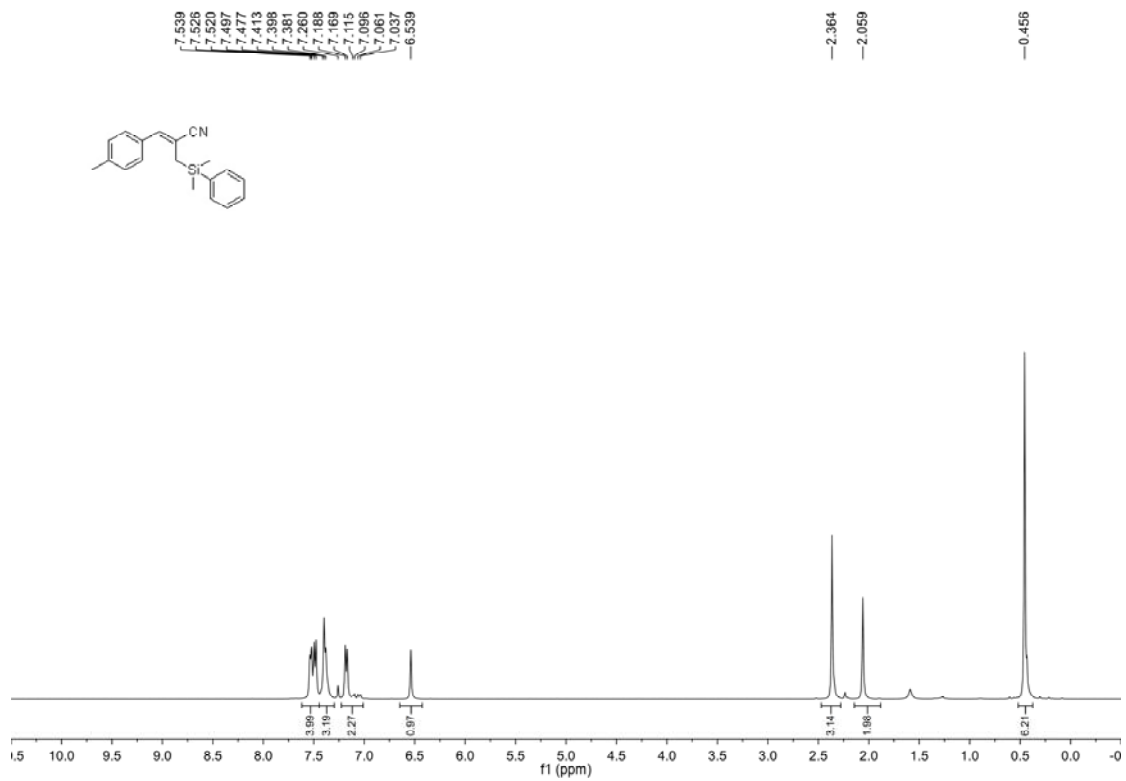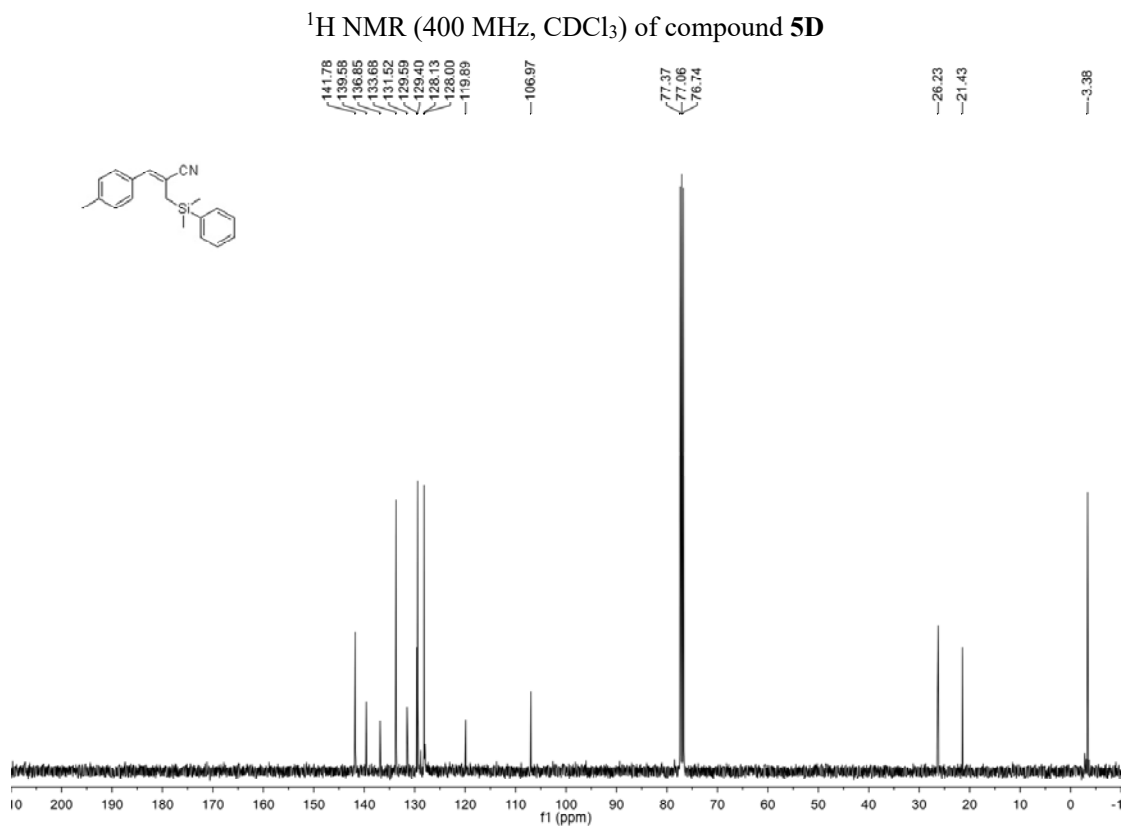



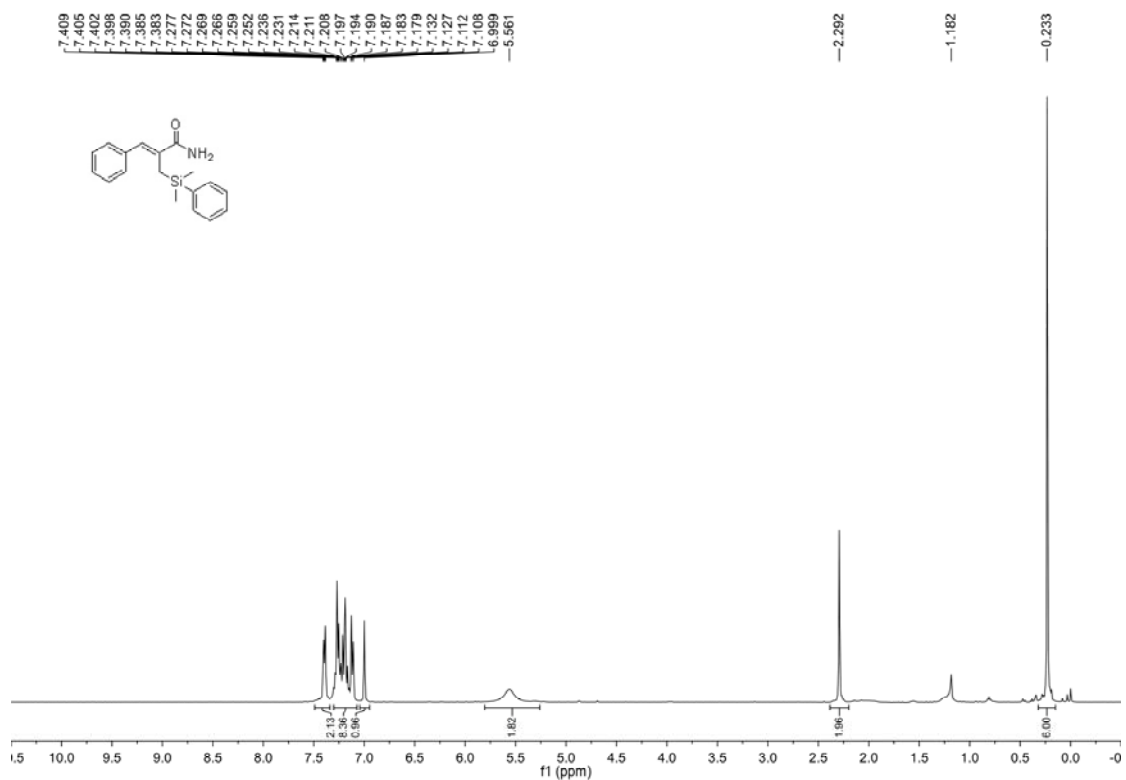

$^1\text{H}$  NMR (400 MHz,  $\text{CDCl}_3$ ) of compound **5E**

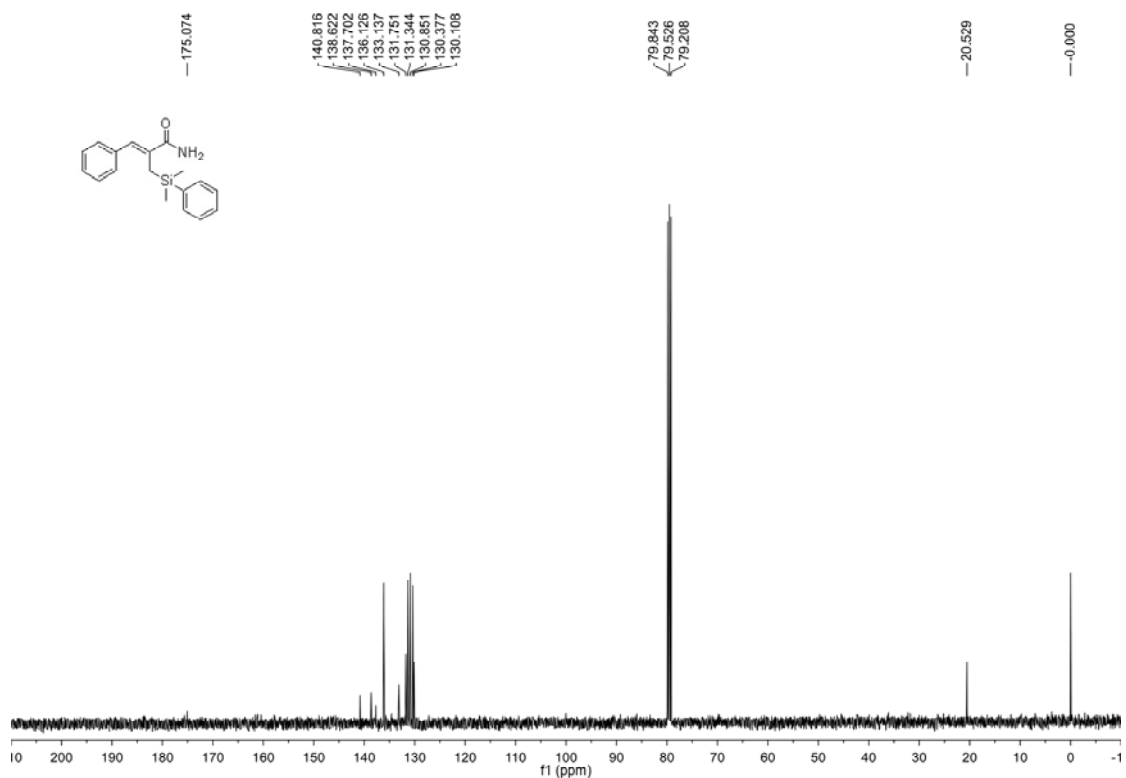

$^{13}\text{C}$  NMR (100 MHz,  $\text{CDCl}_3$ ) of compound **5E**

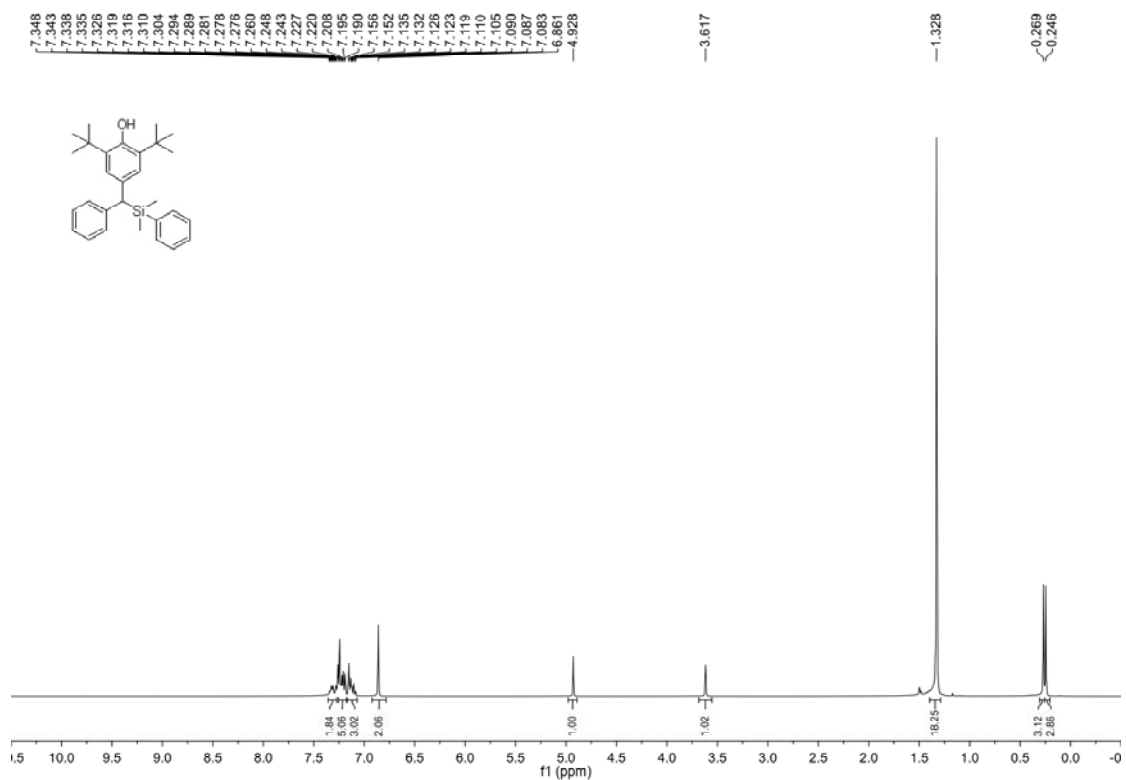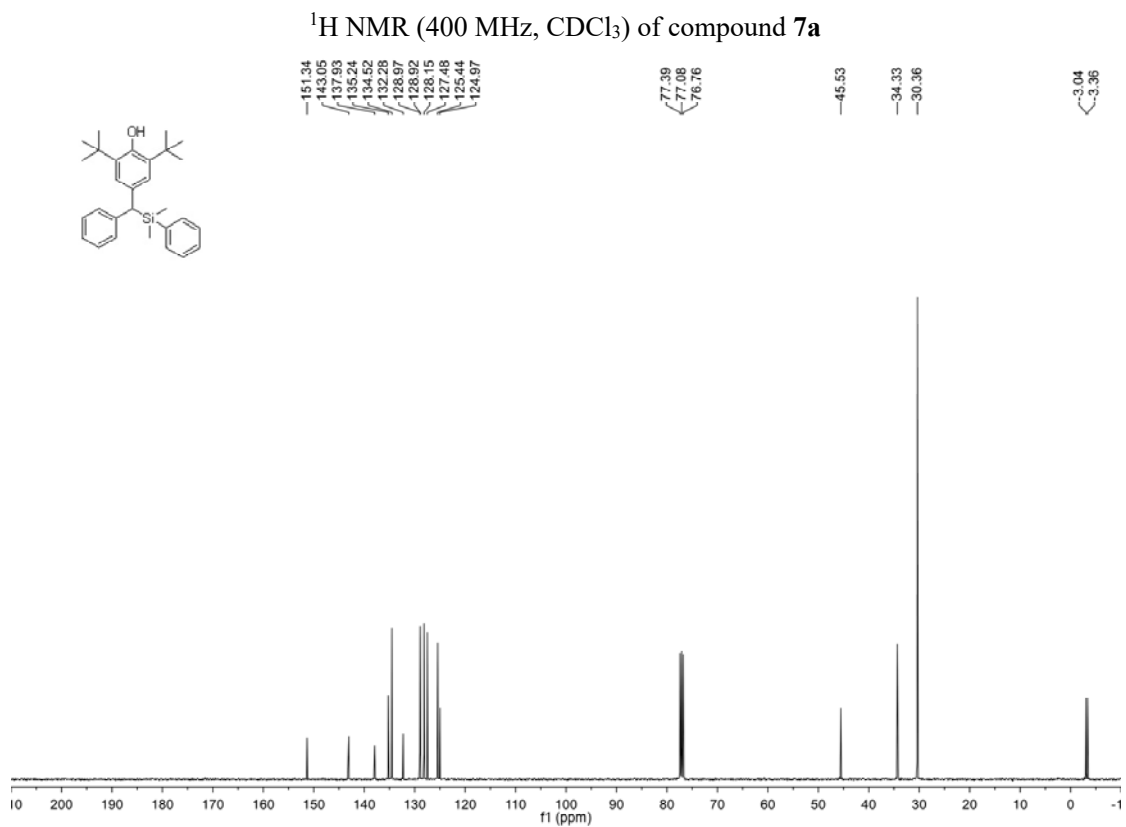

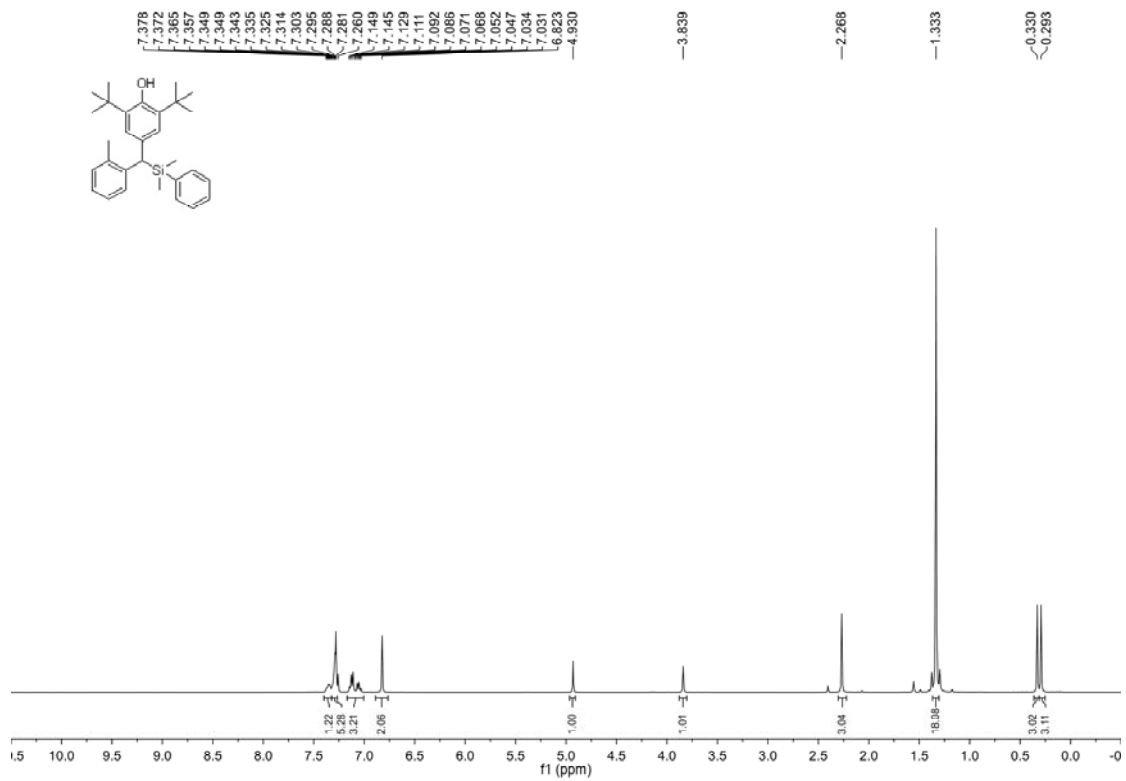

$^1\text{H}$  NMR (400 MHz,  $\text{CDCl}_3$ ) of compound **7b**

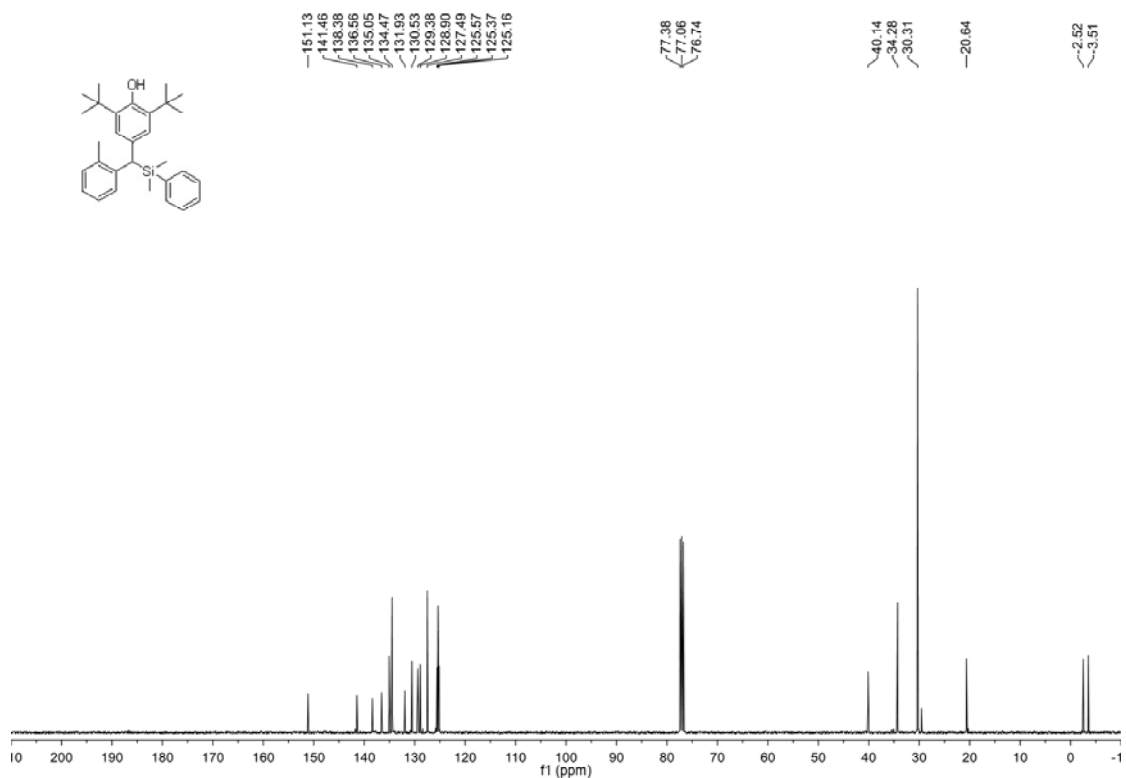

$^{13}\text{C}\{^1\text{H}\}$  NMR (100 MHz,  $\text{CDCl}_3$ ) of compound **7b**

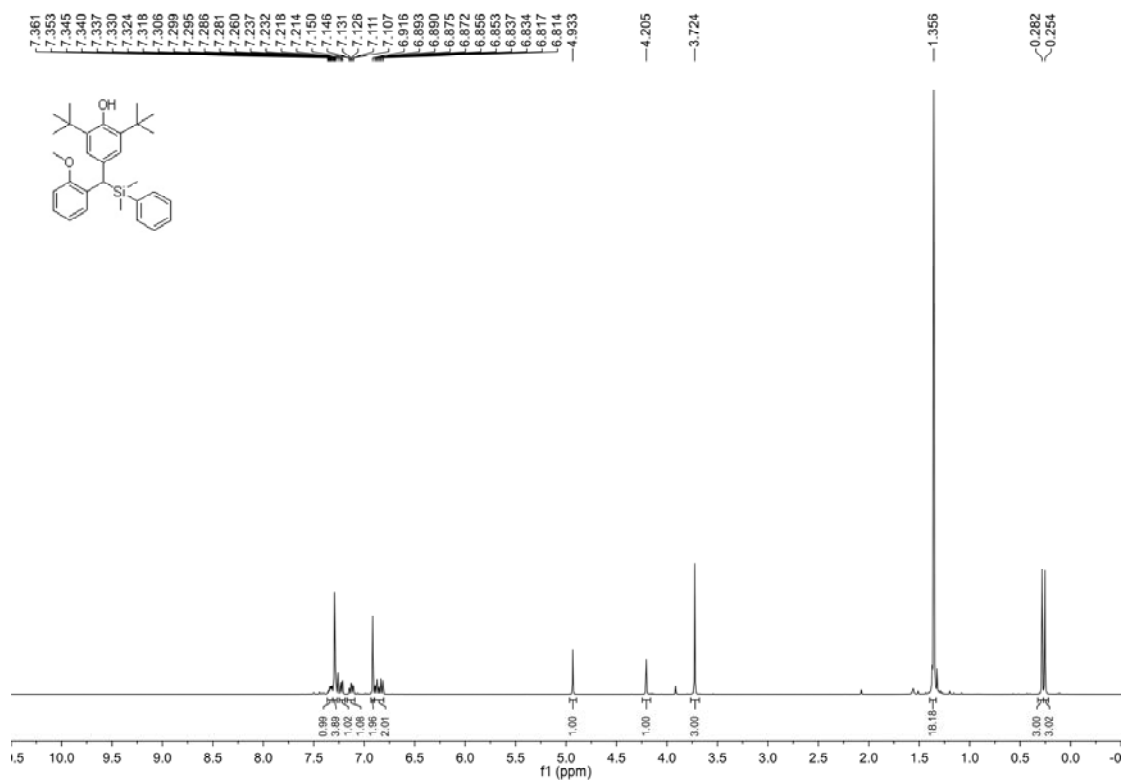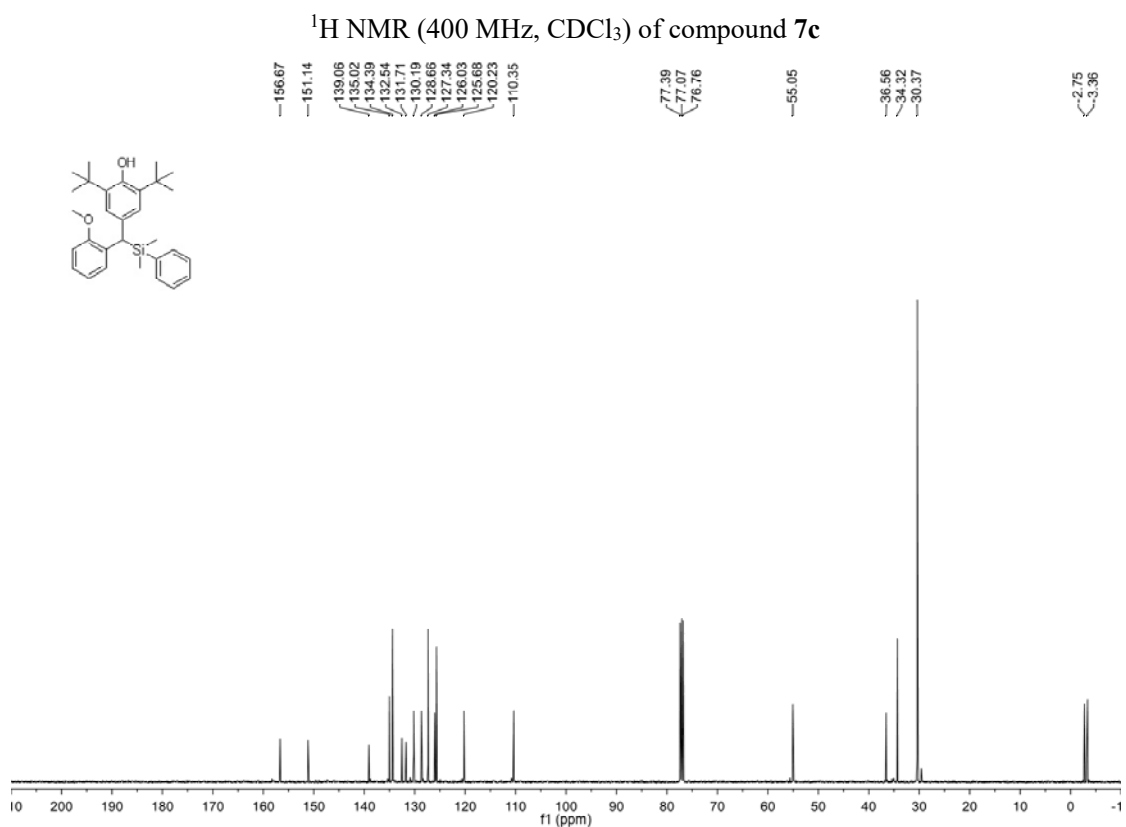

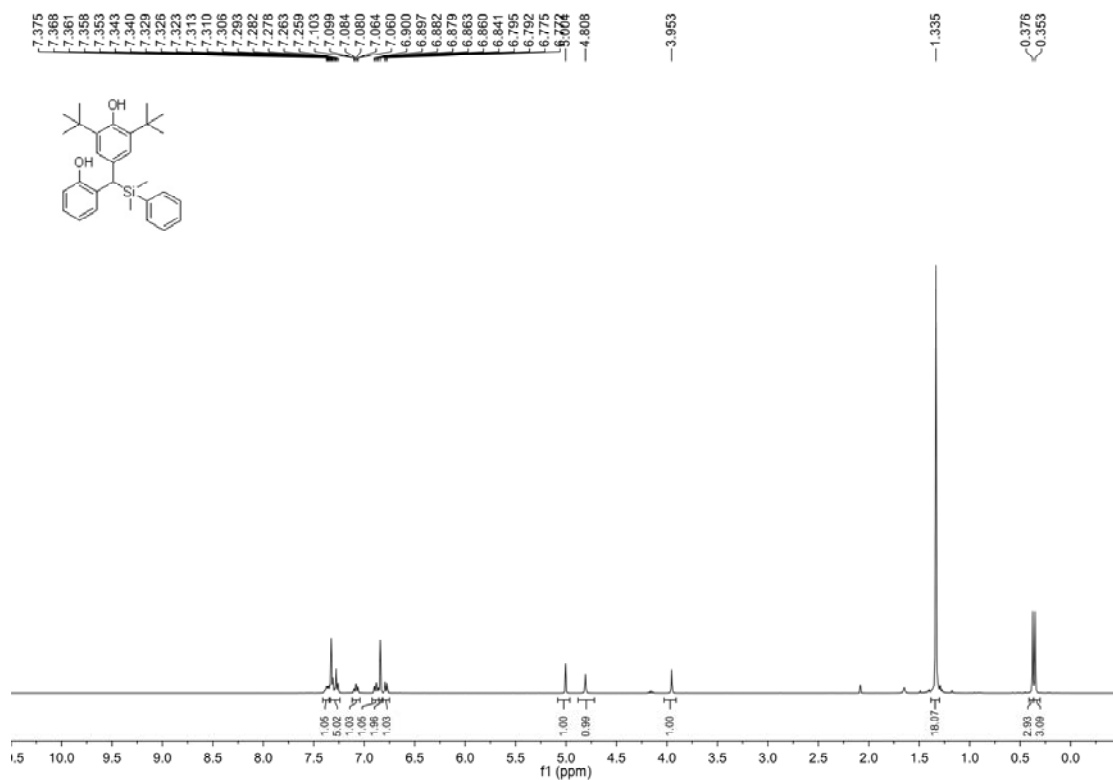

$^1\text{H}$  NMR (400 MHz,  $\text{CDCl}_3$ ) of compound **7d**

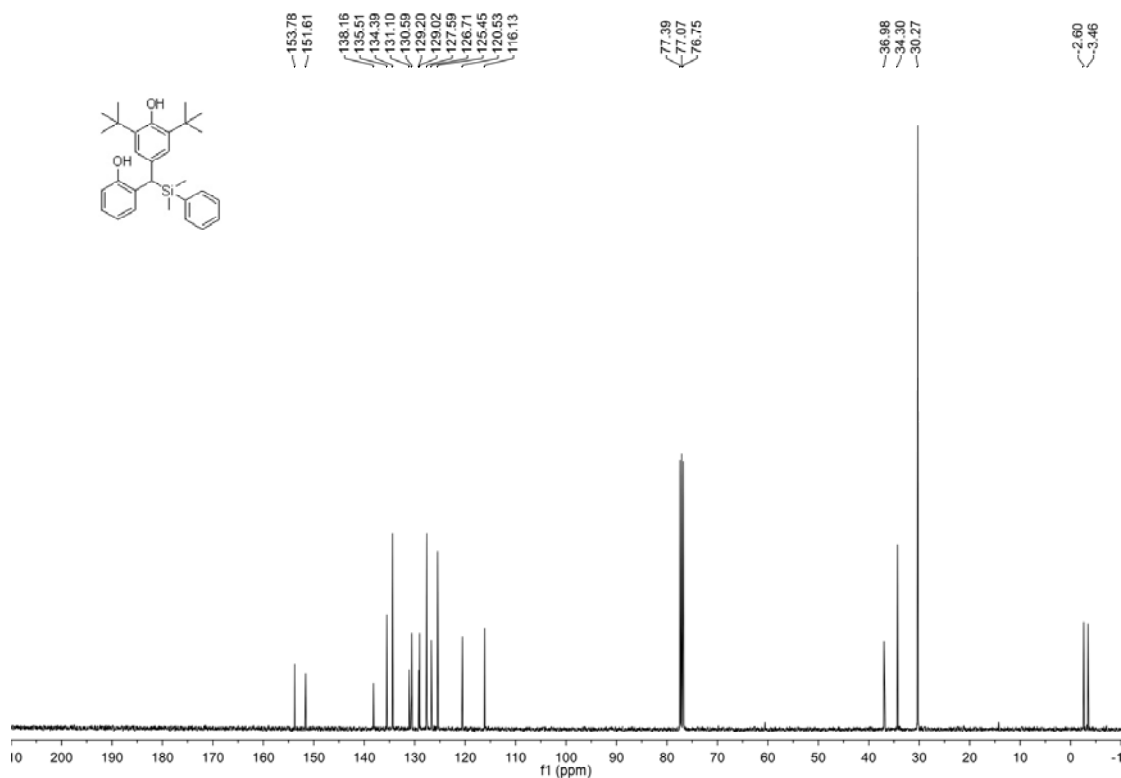

$^{13}\text{C}\{^1\text{H}\}$  NMR (100 MHz,  $\text{CDCl}_3$ ) of compound **7d**

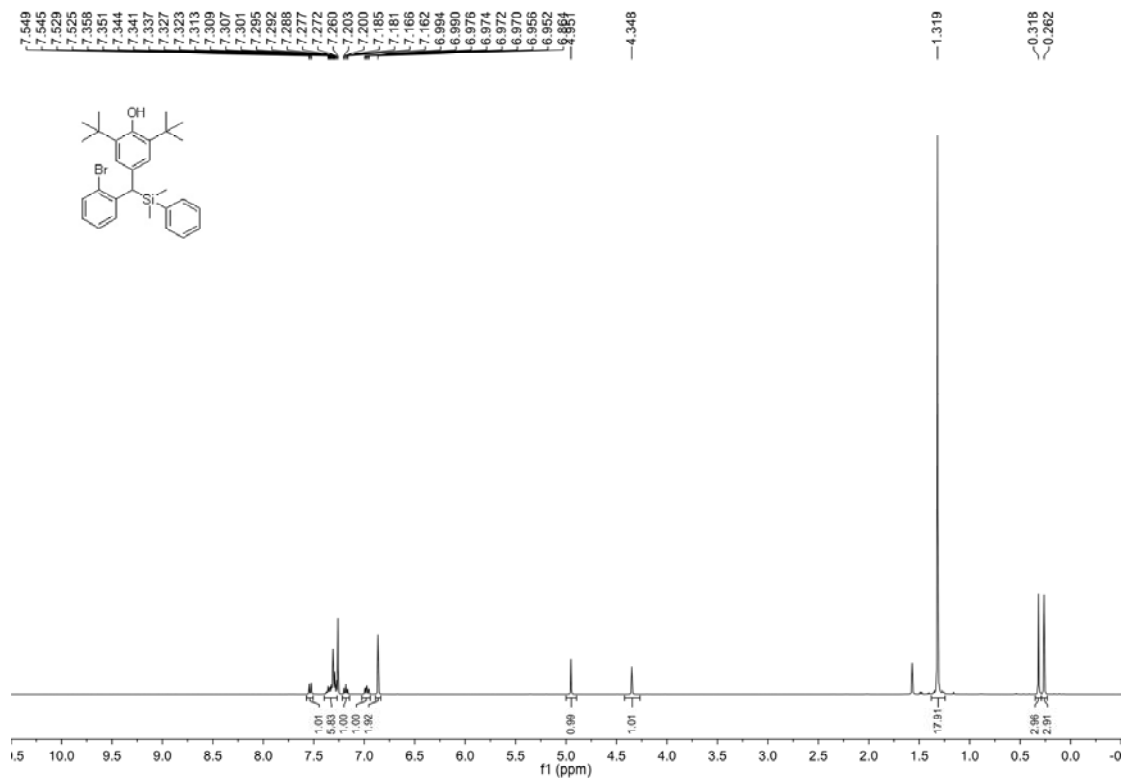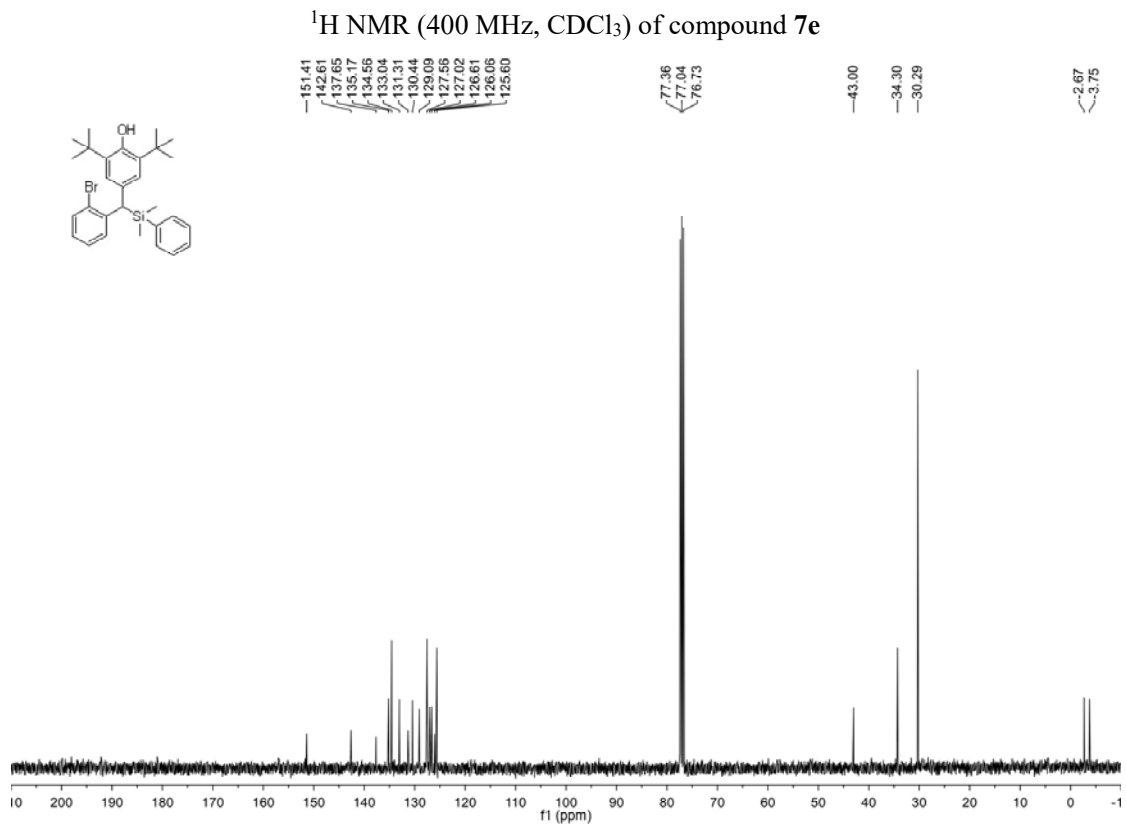

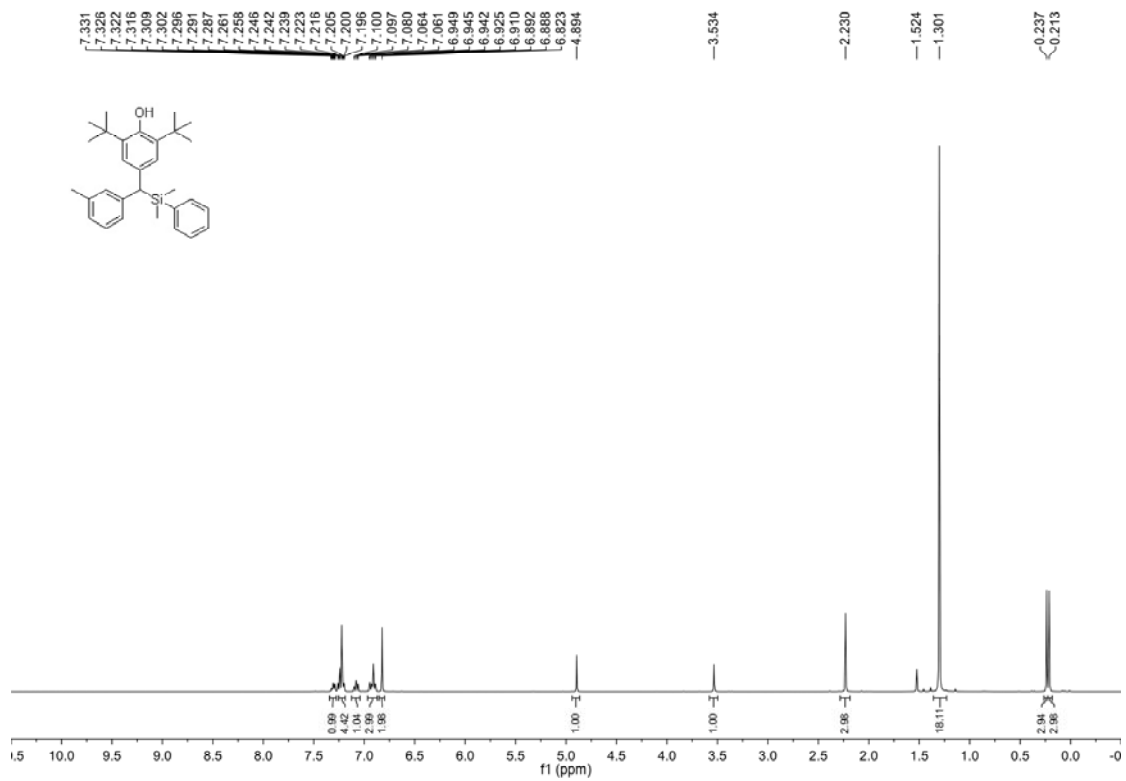

$^1\text{H}$  NMR (400 MHz,  $\text{CDCl}_3$ ) of compound **7f**

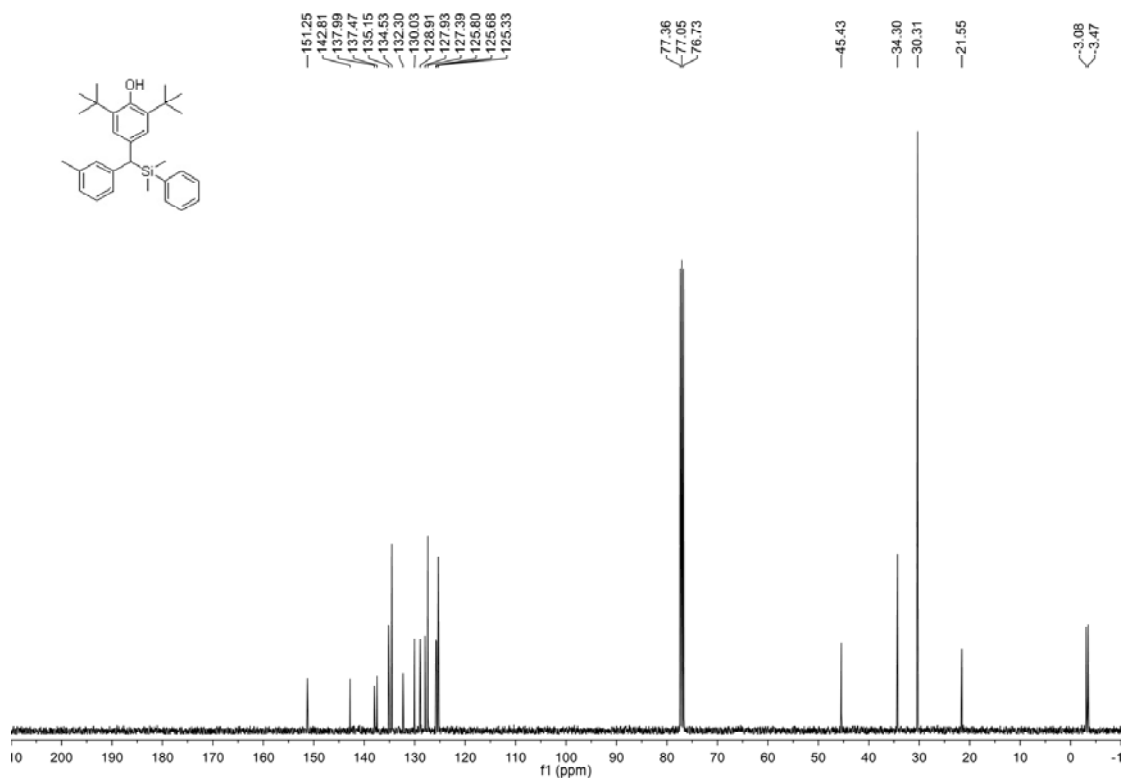

$^{13}\text{C}$  NMR (100 MHz,  $\text{CDCl}_3$ ) of compound **7f**

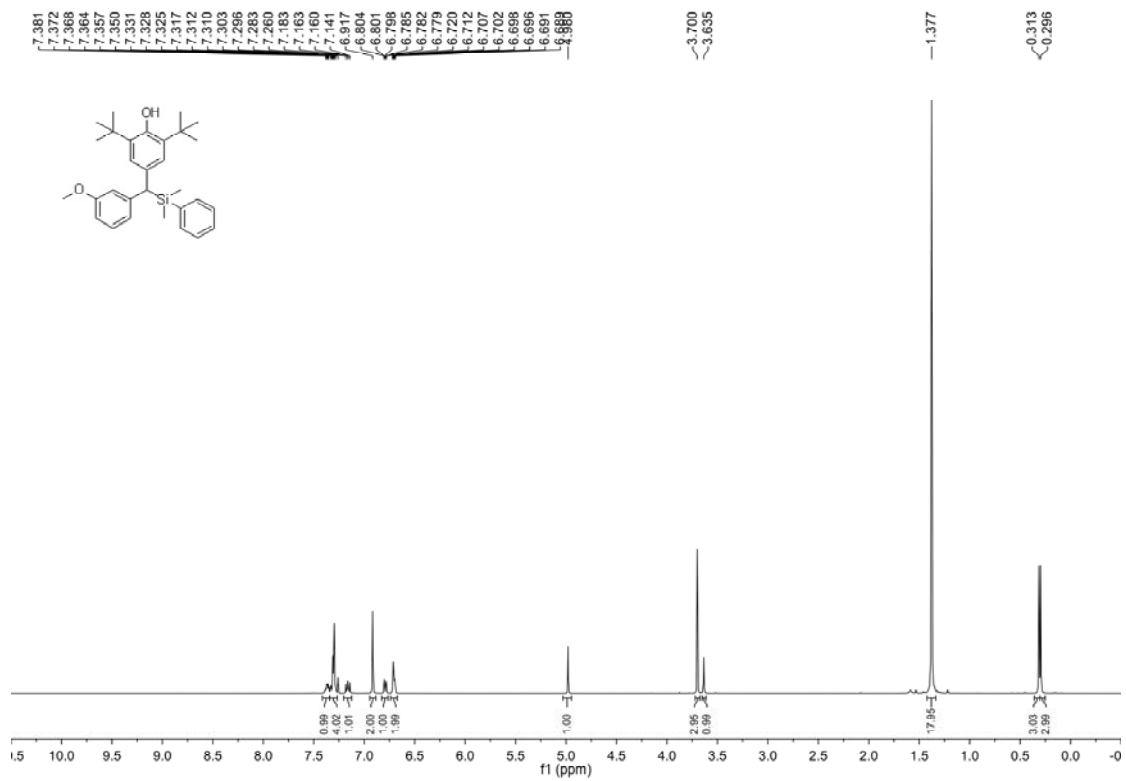

**<sup>1</sup>H NMR (400 MHz, CDCl<sub>3</sub>) of compound 7g**

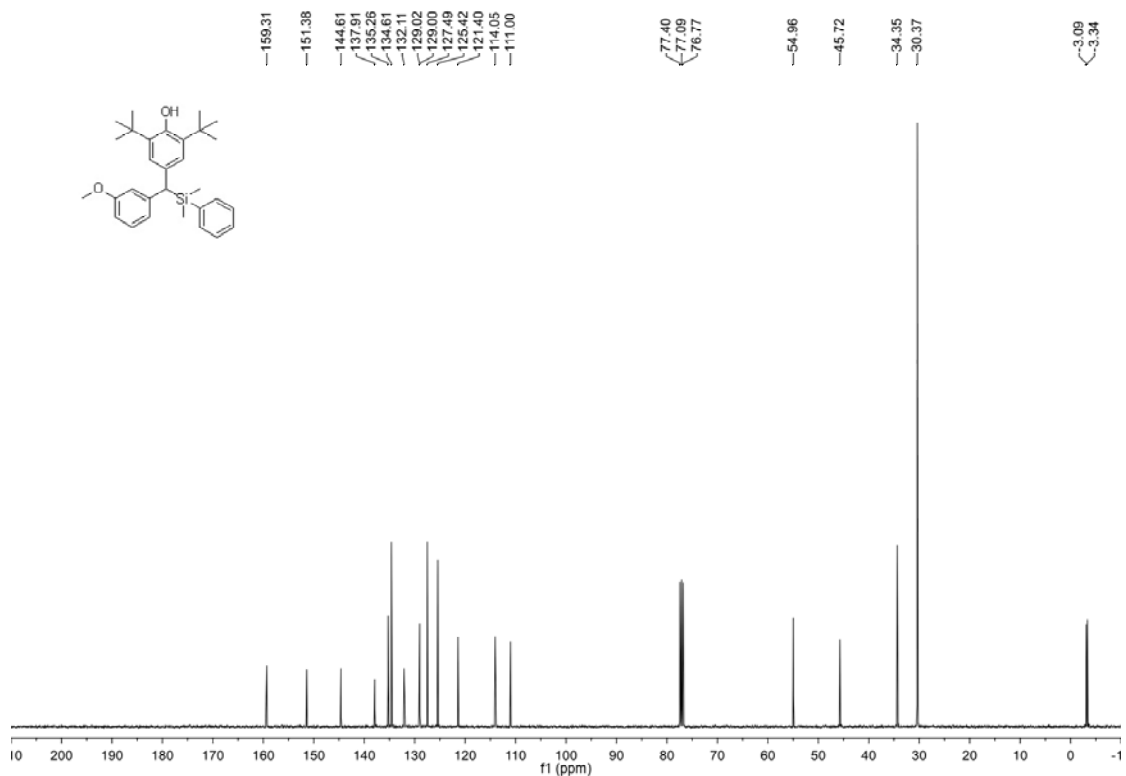

**<sup>13</sup>C {<sup>1</sup>H} NMR (100 MHz, CDCl<sub>3</sub>) of compound 7g**



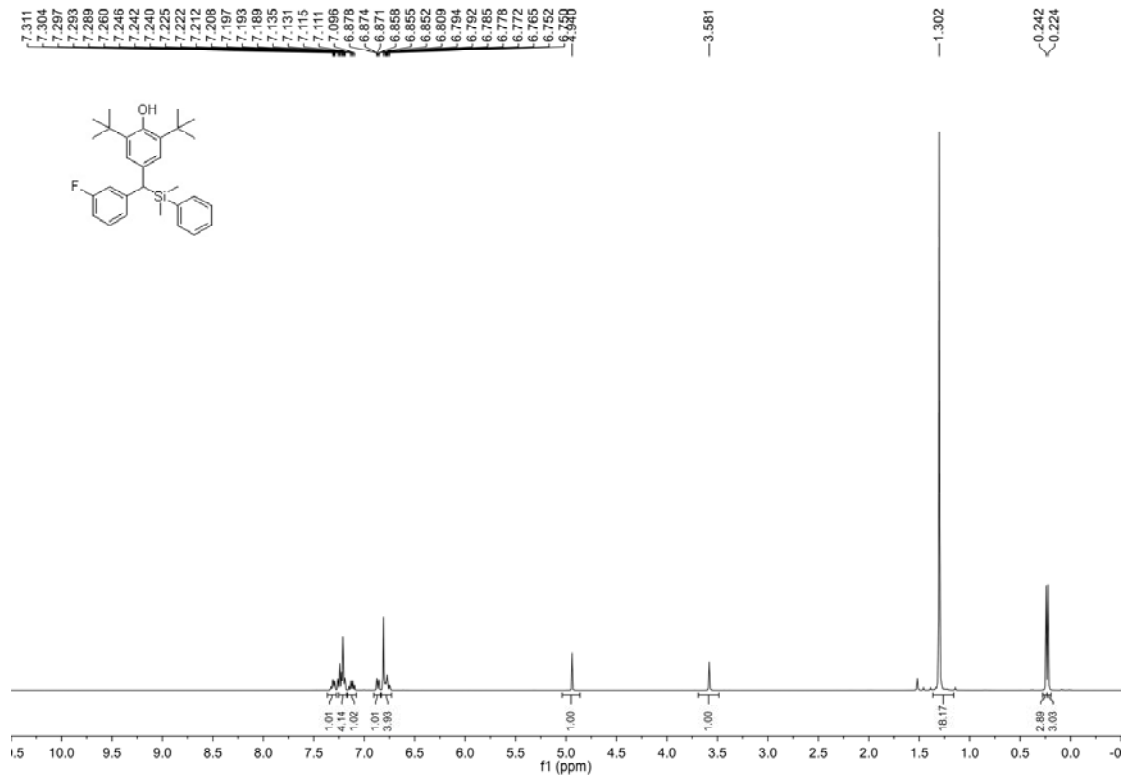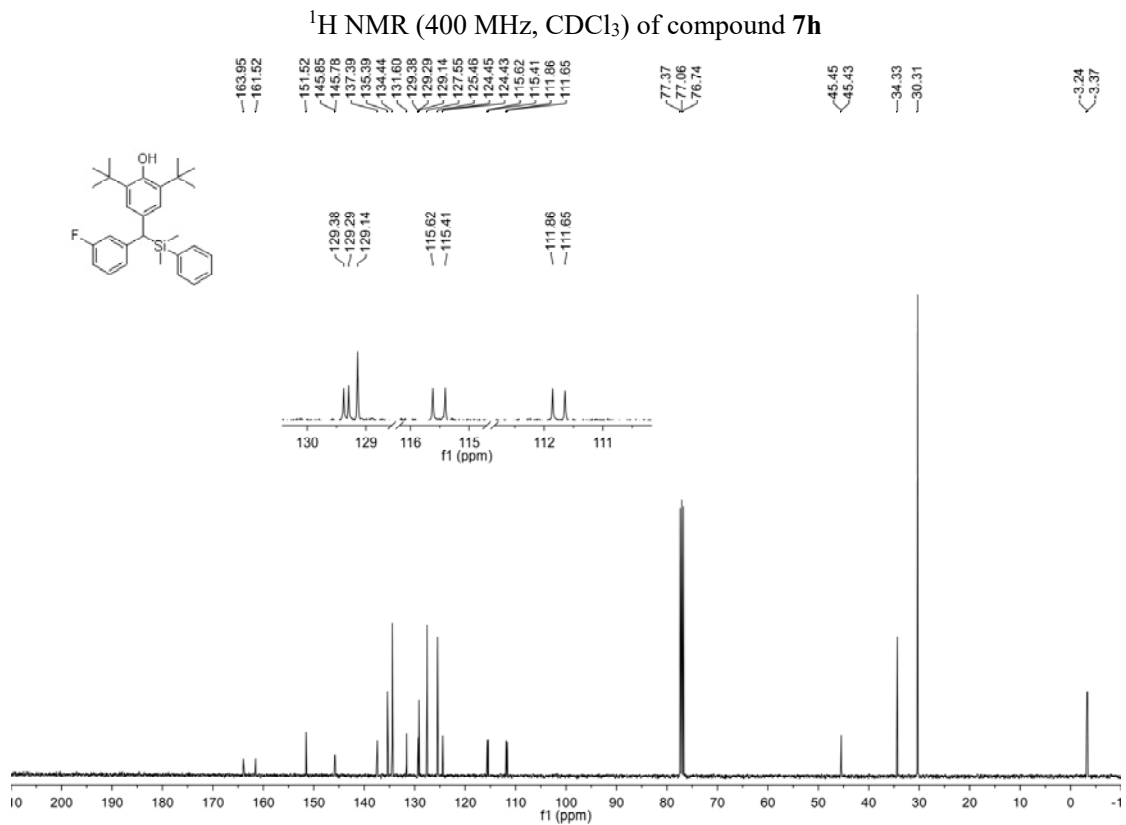

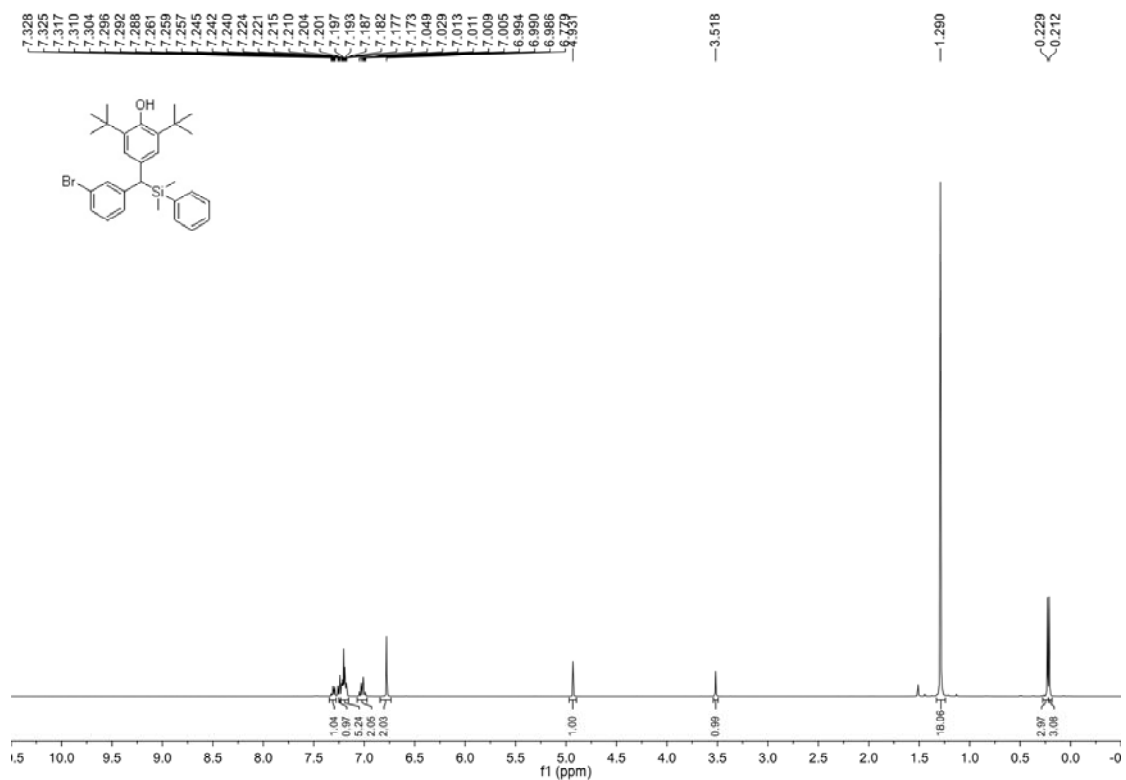

<sup>1</sup>H NMR (400 MHz, CDCl<sub>3</sub>) of compound **7i**

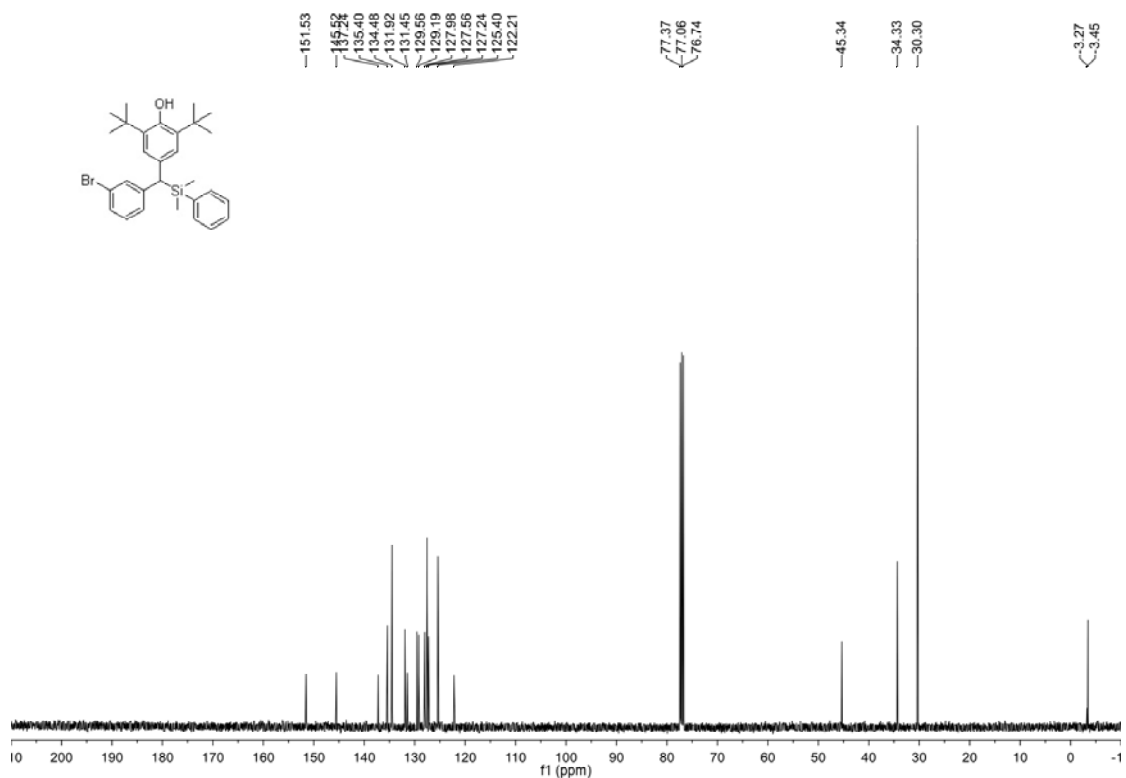

<sup>13</sup>C{<sup>1</sup>H} NMR (100 MHz, CDCl<sub>3</sub>) of compound **7i**

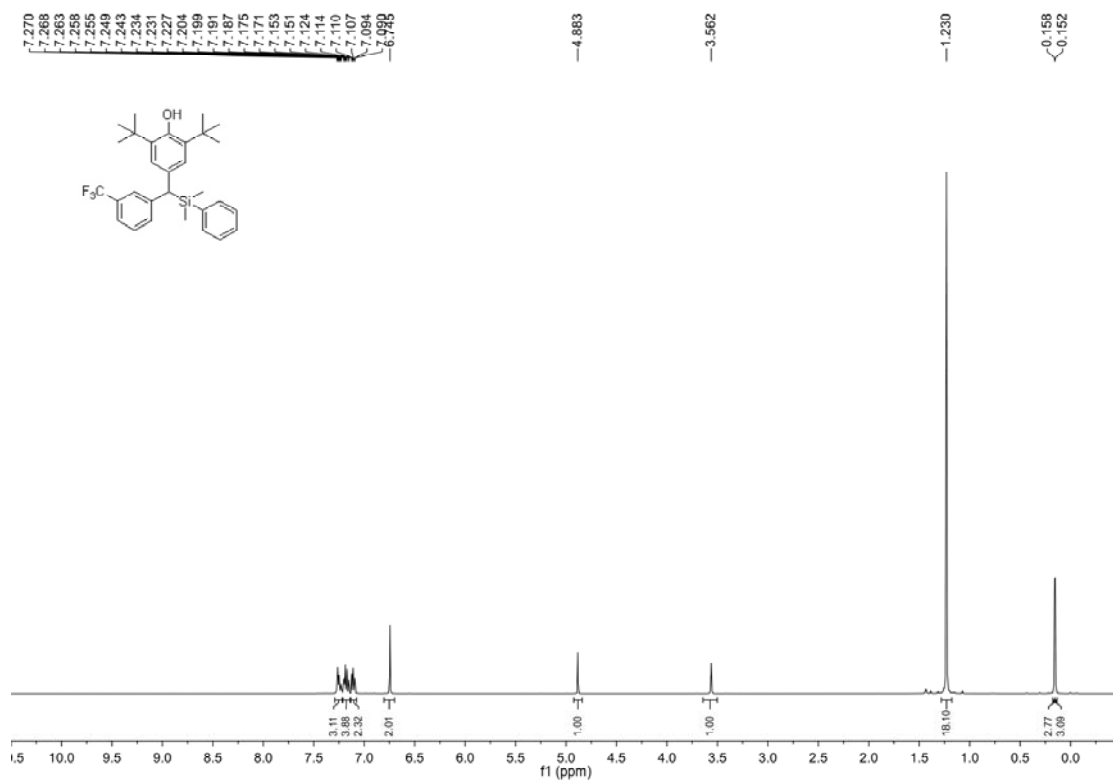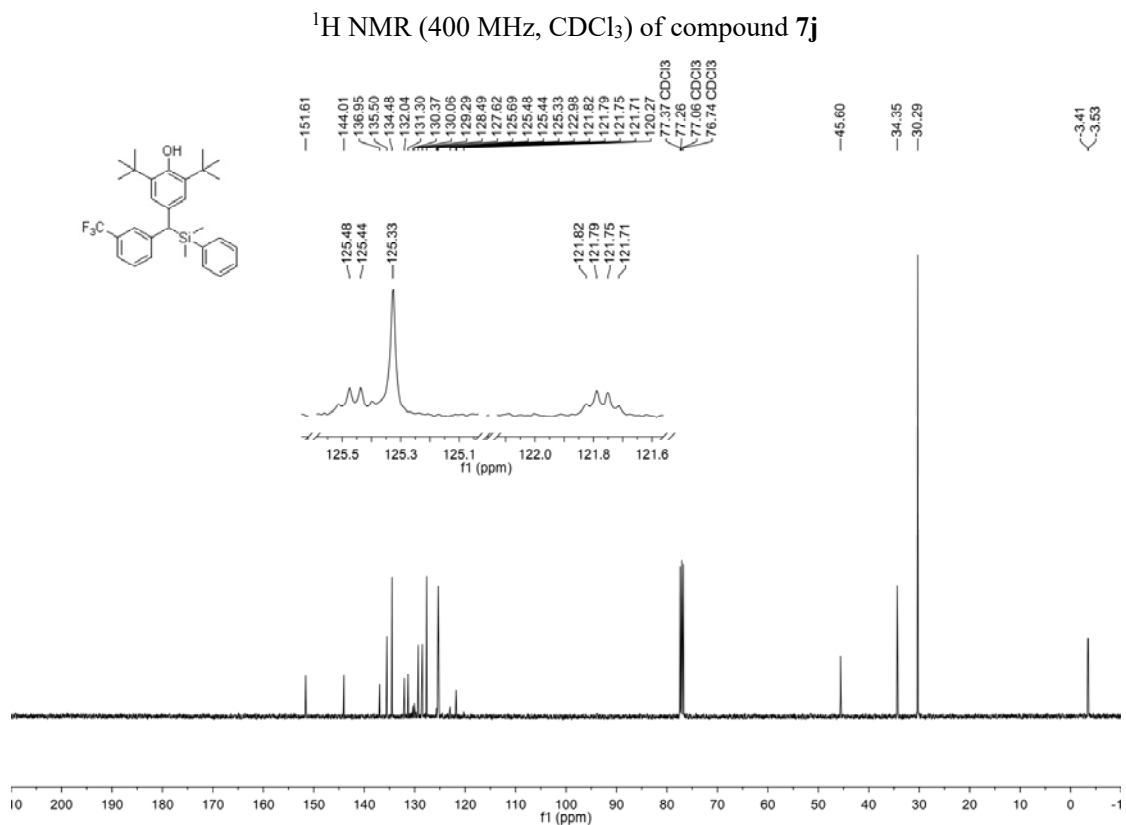

**<sup>13</sup>C {<sup>1</sup>H} NMR (100 MHz, CDCl<sub>3</sub>) of compound **7j****

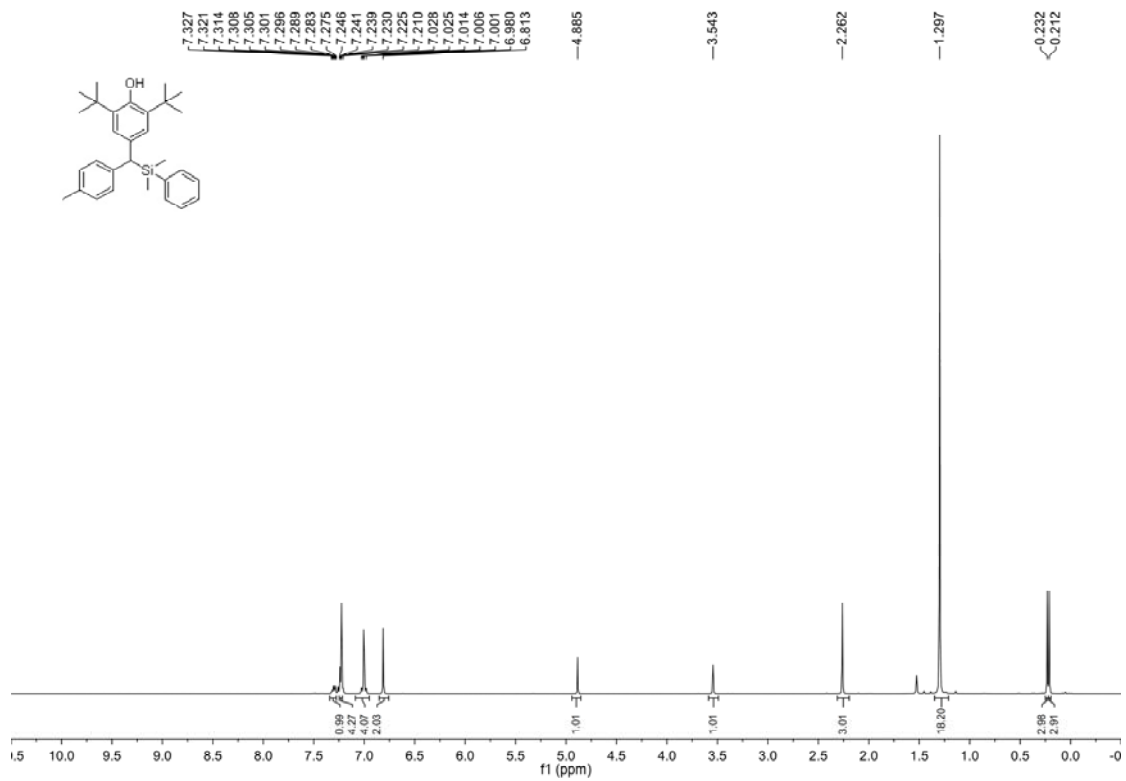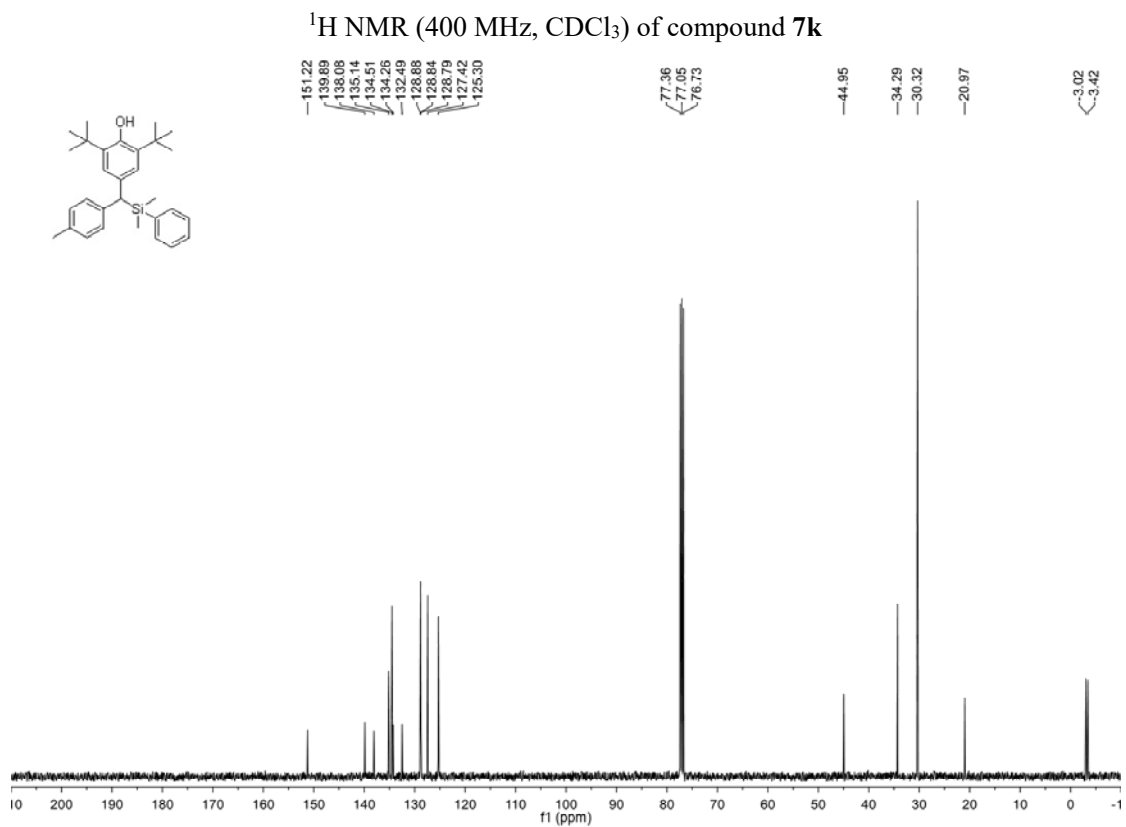

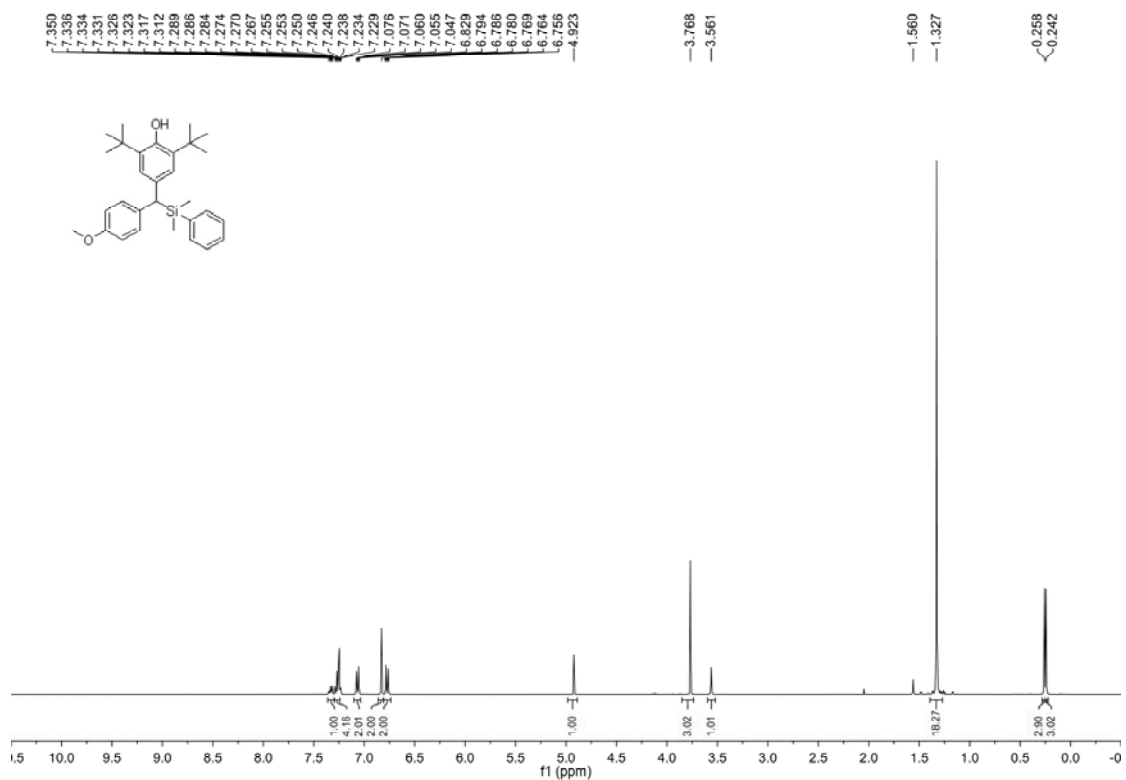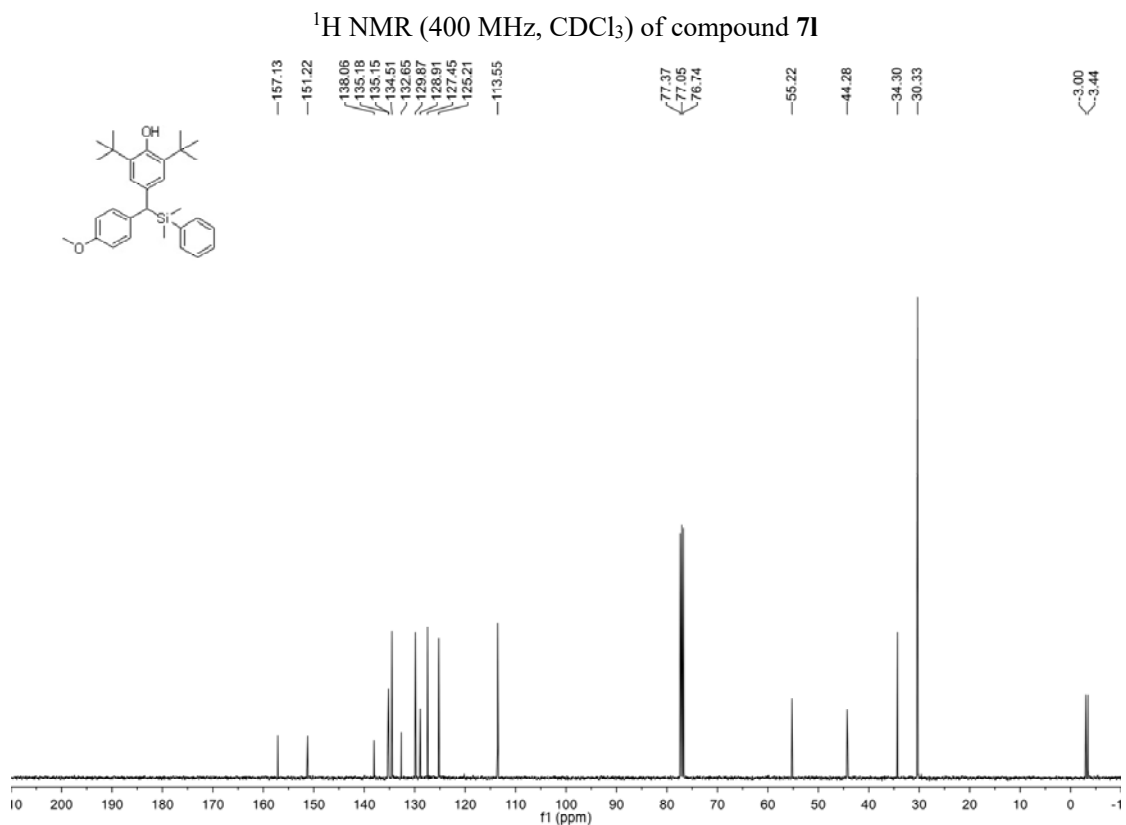

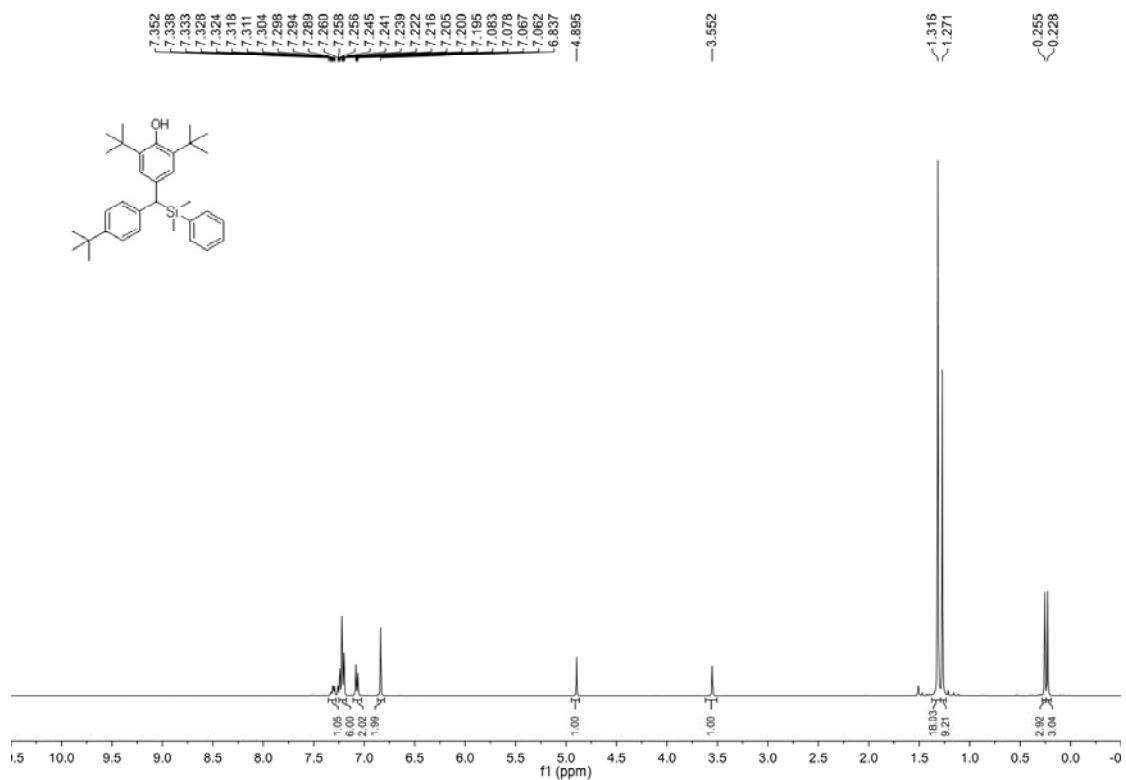

<sup>1</sup>H NMR (400 MHz, CDCl<sub>3</sub>) of compound **7m**

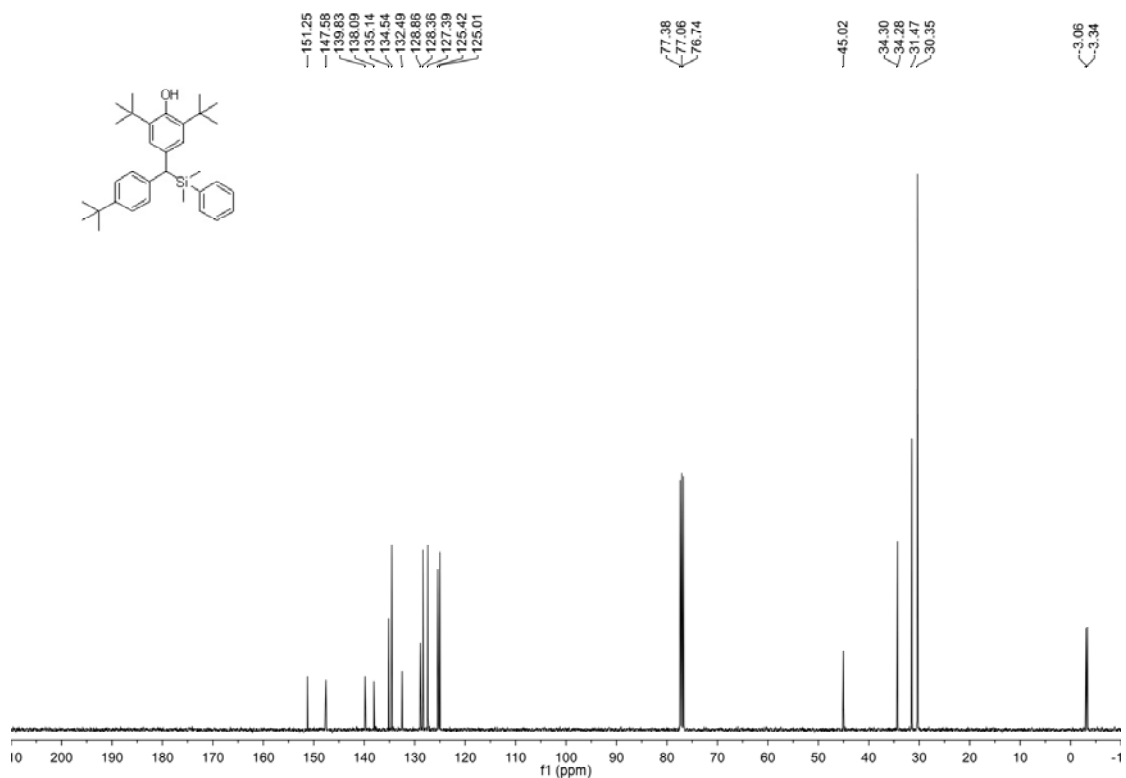

<sup>13</sup>C NMR (100 MHz, CDCl<sub>3</sub>) of compound **7m**

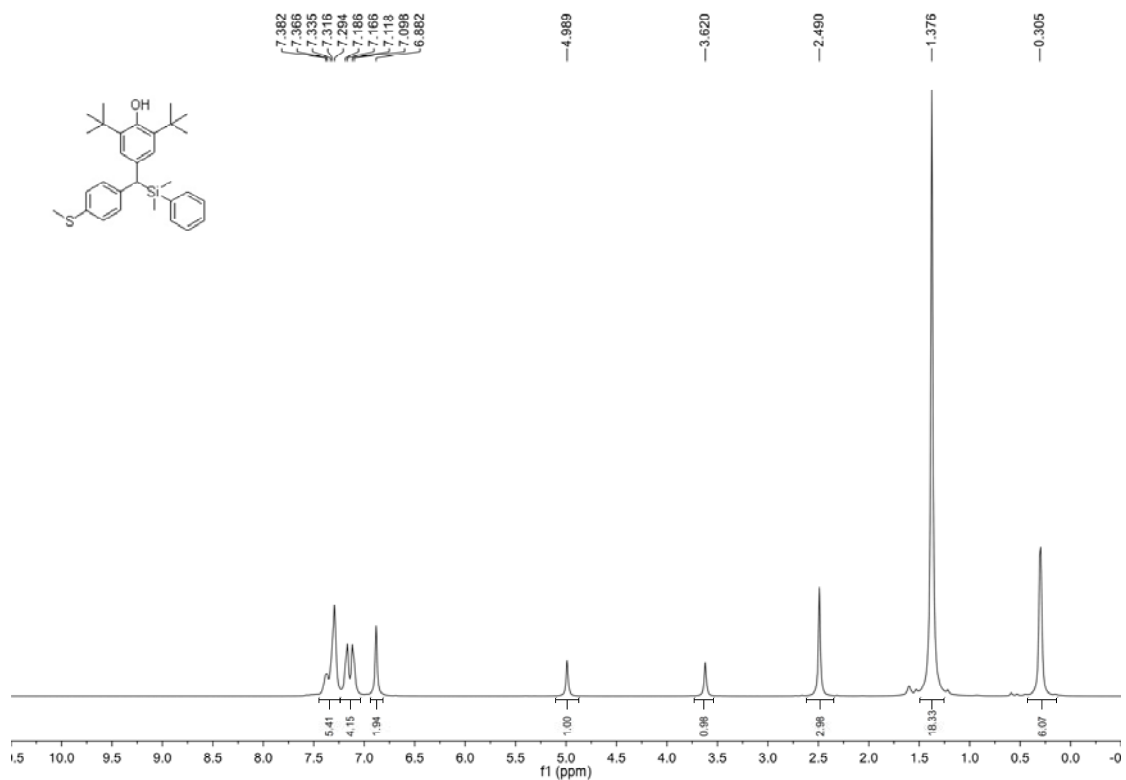

$^1\text{H}$  NMR (400 MHz,  $\text{CDCl}_3$ ) of compound **7n**

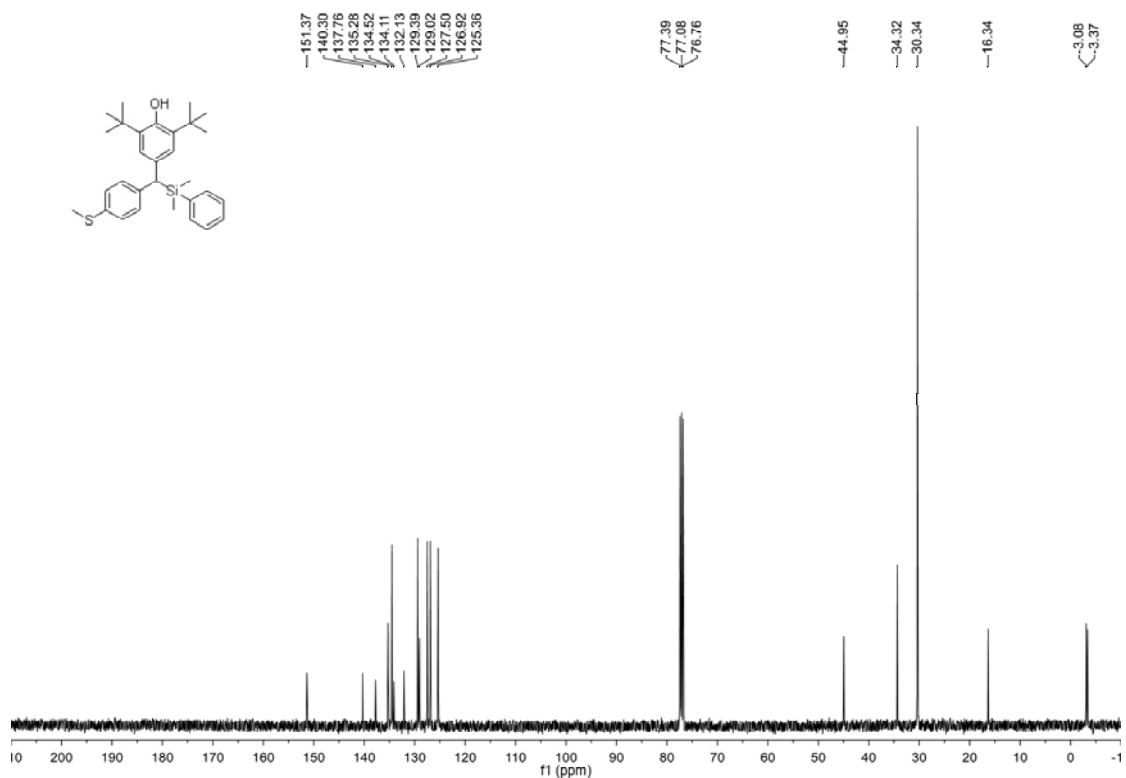

$^{13}\text{C}\{^1\text{H}\}$  NMR (100 MHz,  $\text{CDCl}_3$ ) of compound **7n**

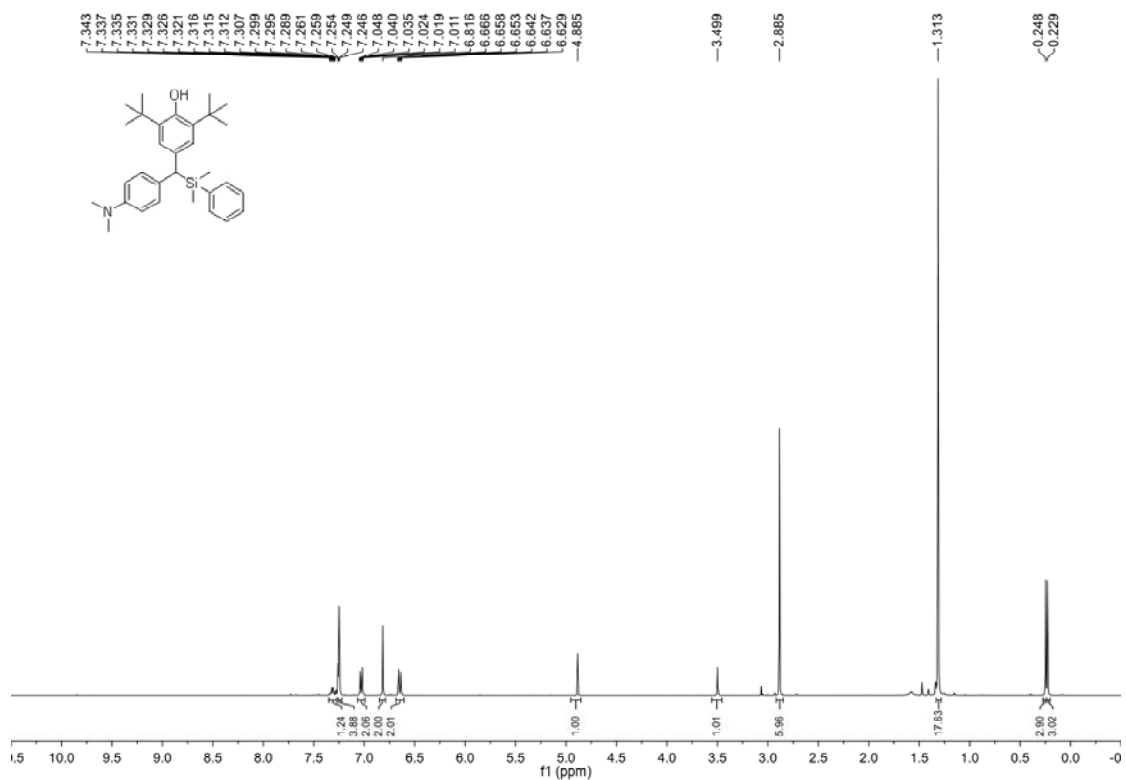

<sup>1</sup>H NMR (400 MHz, CDCl<sub>3</sub>) of compound **7o**

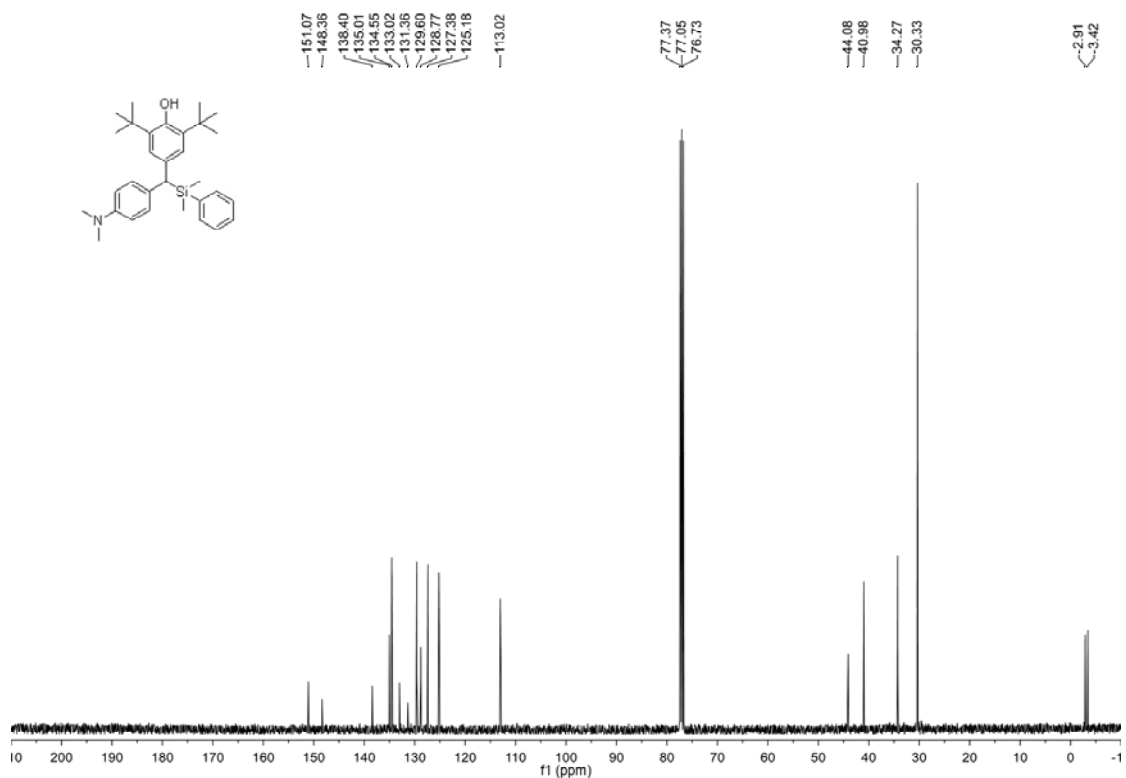

<sup>13</sup>C {<sup>1</sup>H} NMR (100 MHz, CDCl<sub>3</sub>) of compound **7o**



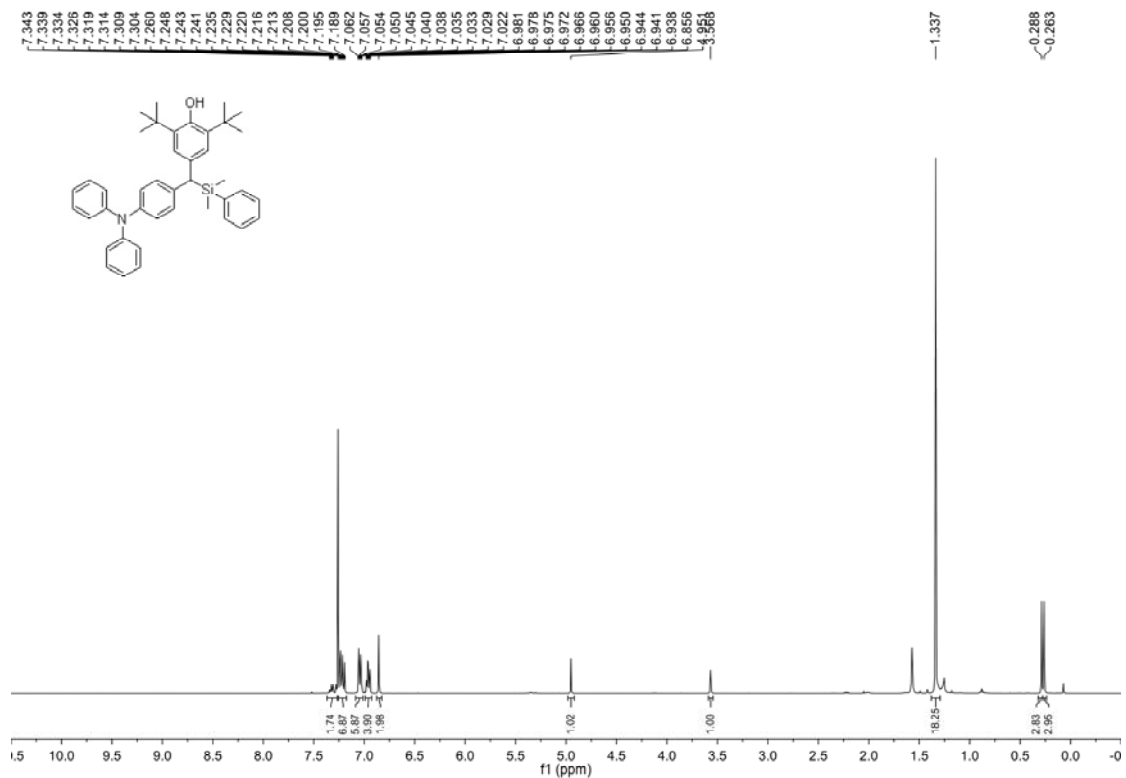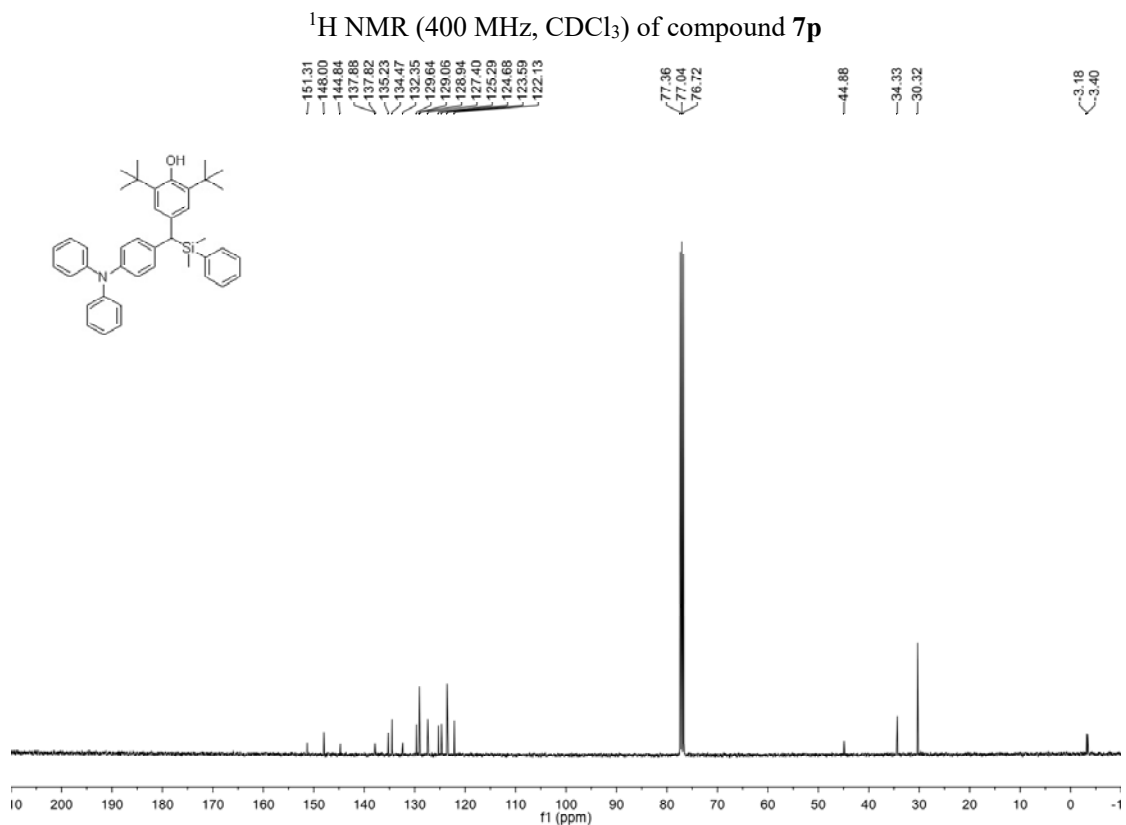

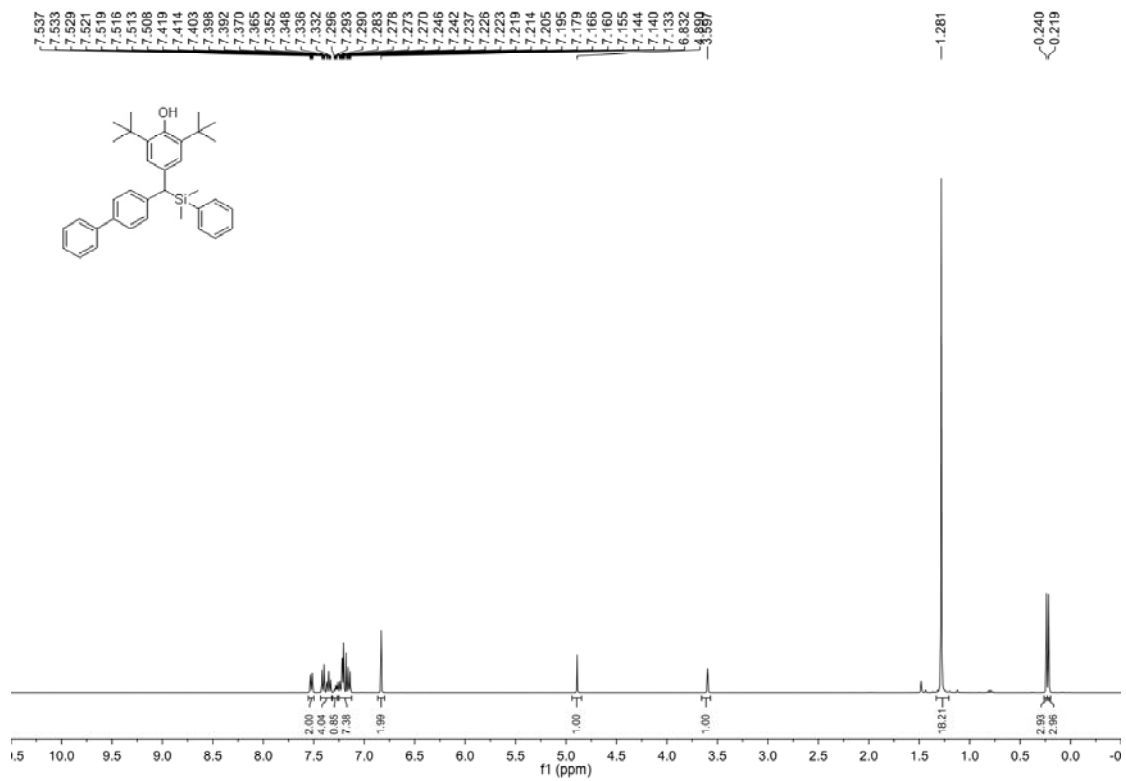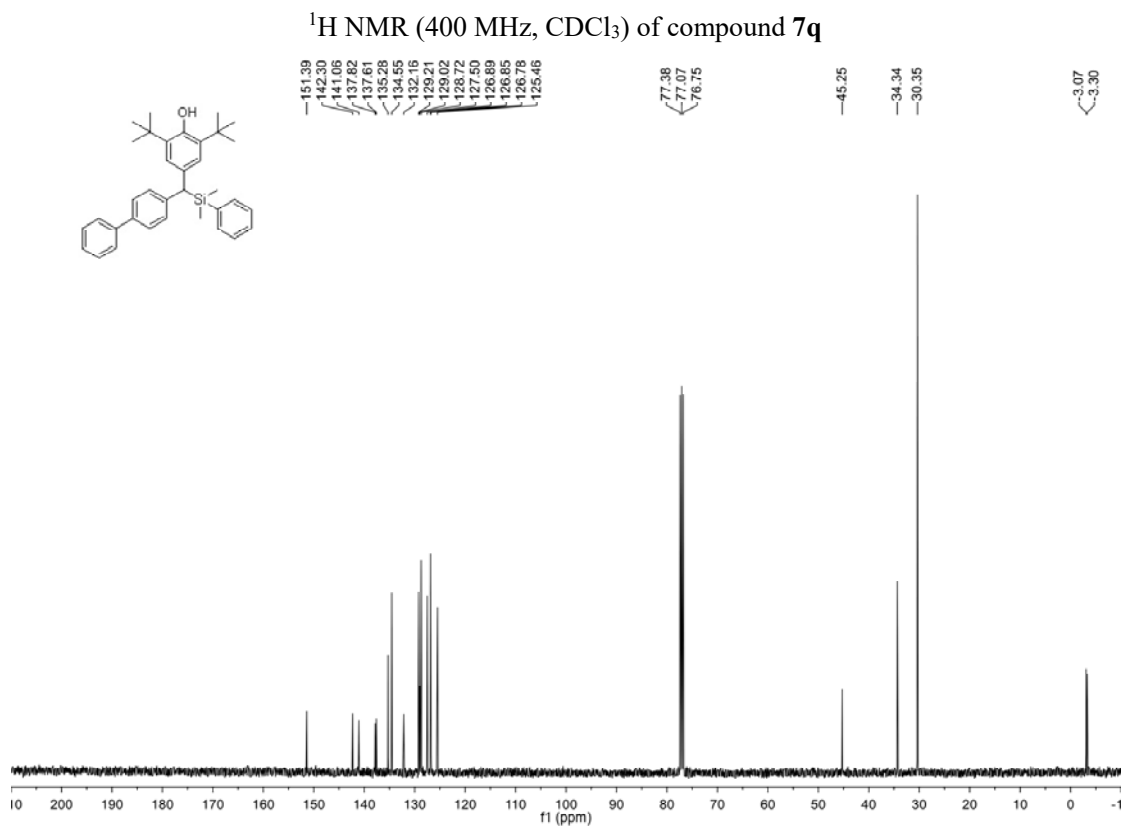

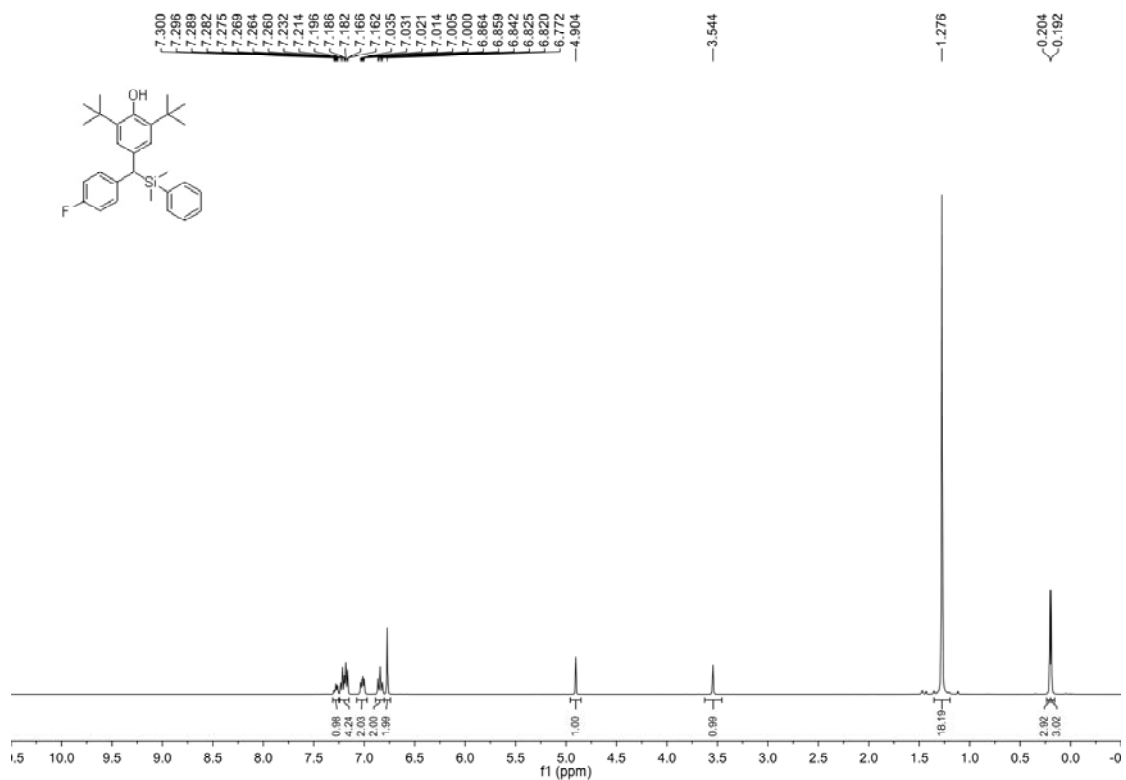

<sup>1</sup>H NMR (400 MHz, CDCl<sub>3</sub>) of compound **7r**

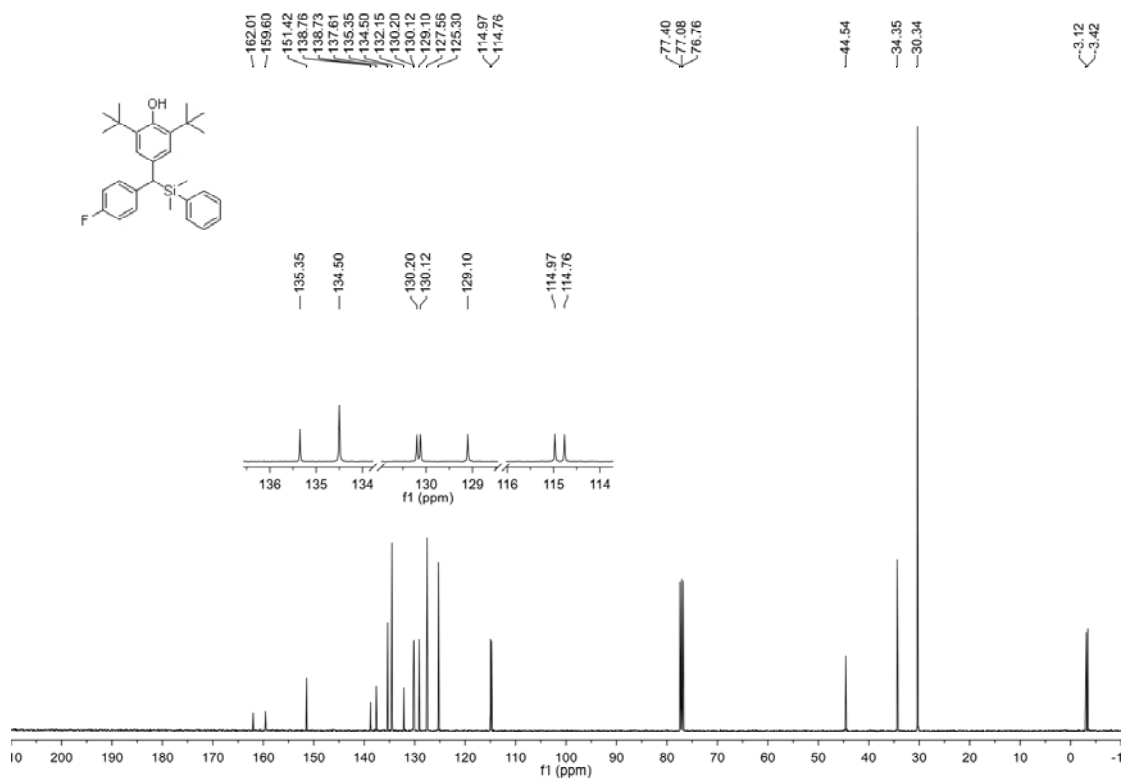

<sup>13</sup>C {<sup>1</sup>H} NMR (100 MHz, CDCl<sub>3</sub>) of compound **7r**

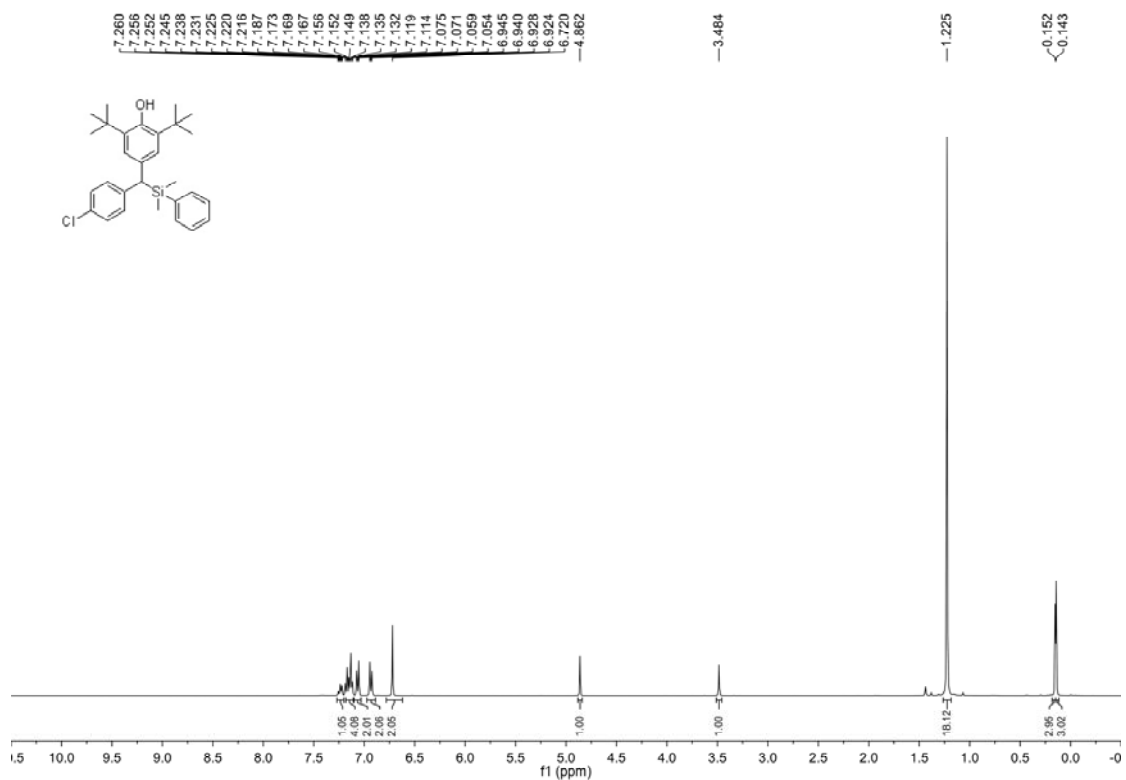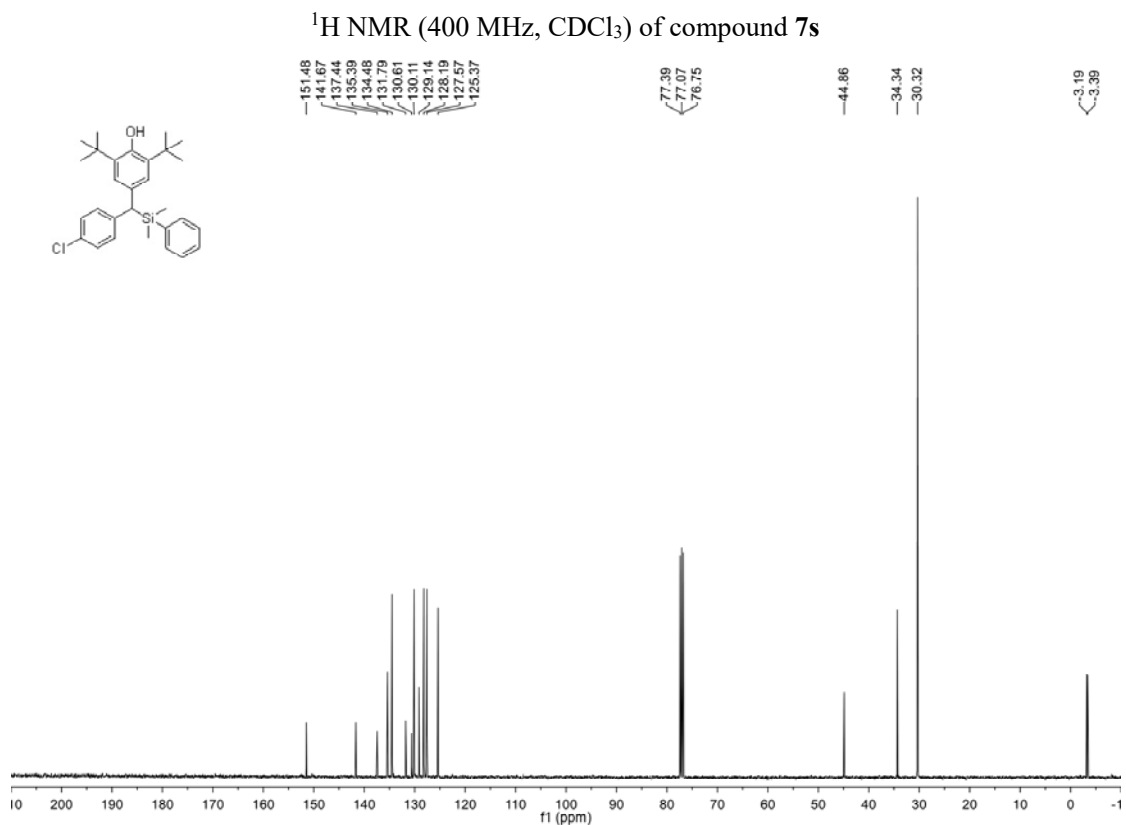

$^{13}\text{C}\{^1\text{H}\}$  NMR (100 MHz,  $\text{CDCl}_3$ ) of compound **7s**

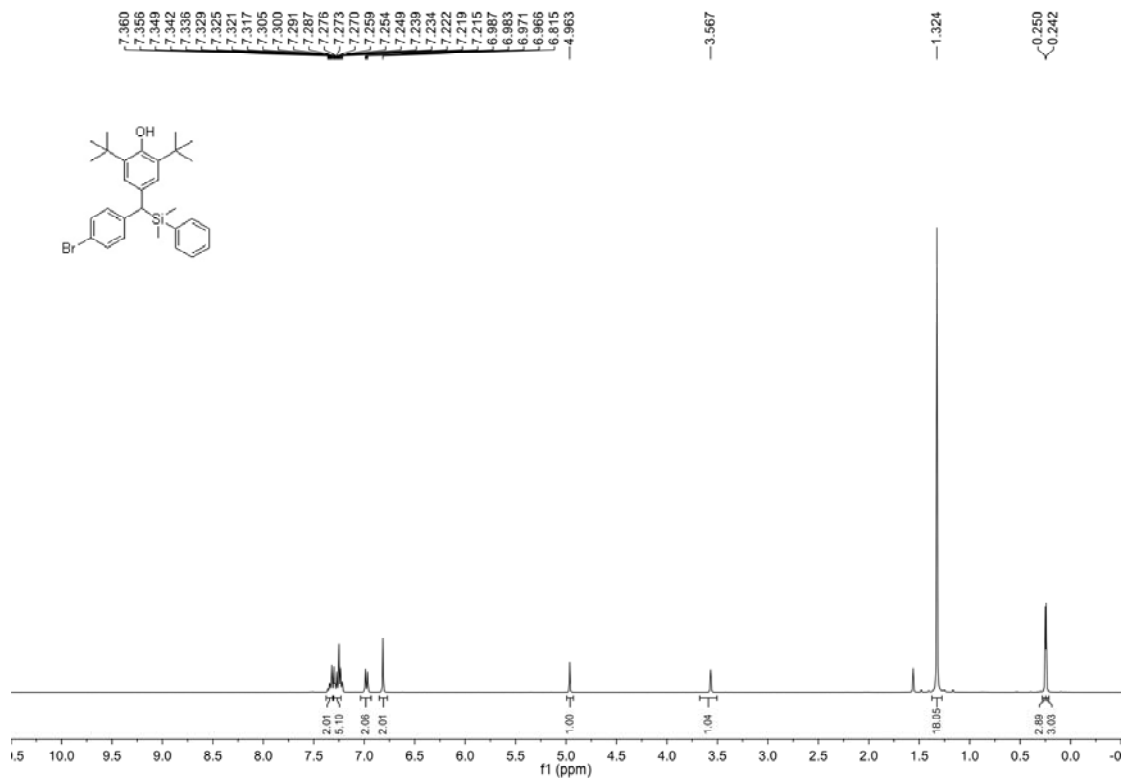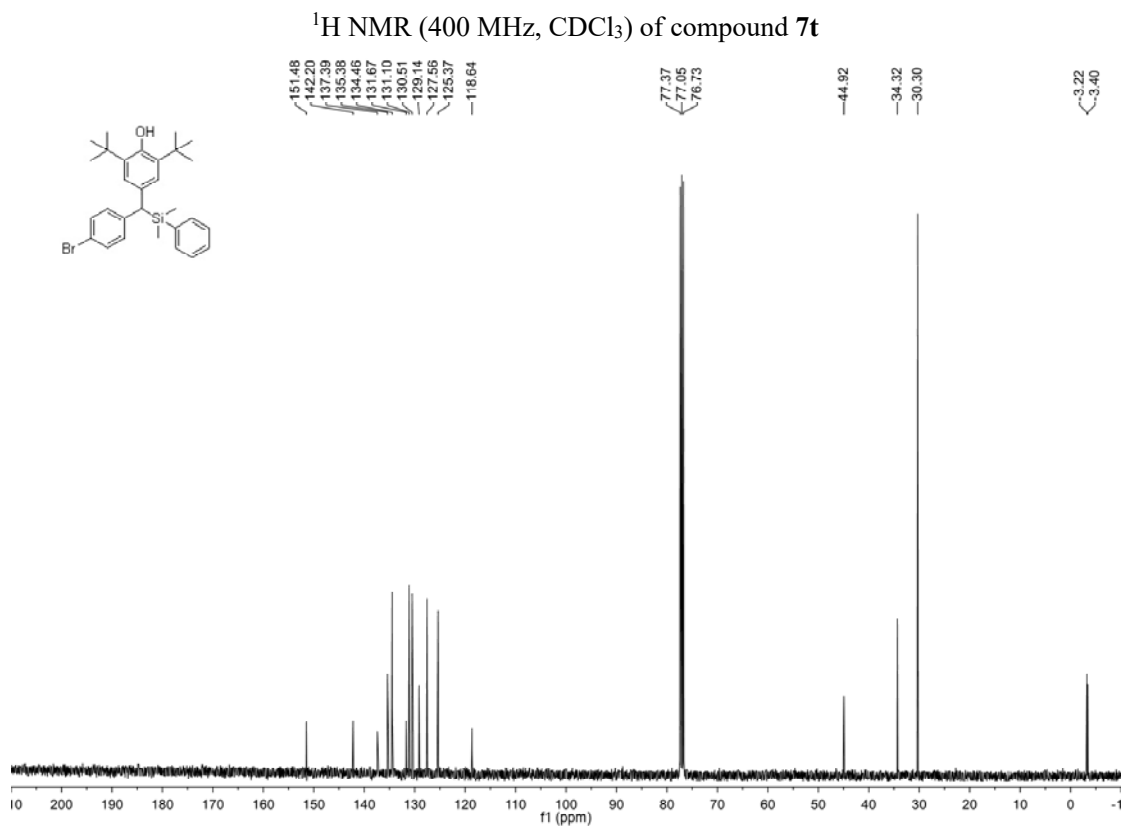

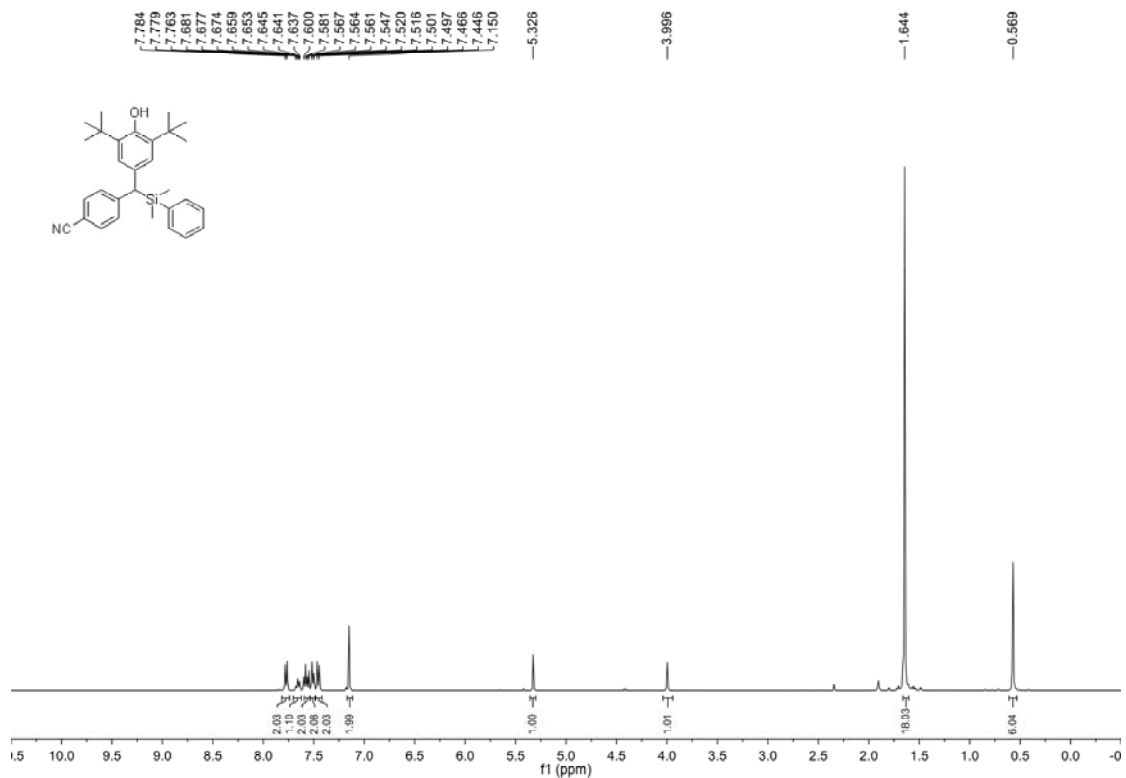

<sup>1</sup>H NMR (400 MHz, CDCl<sub>3</sub>) of compound **7u**

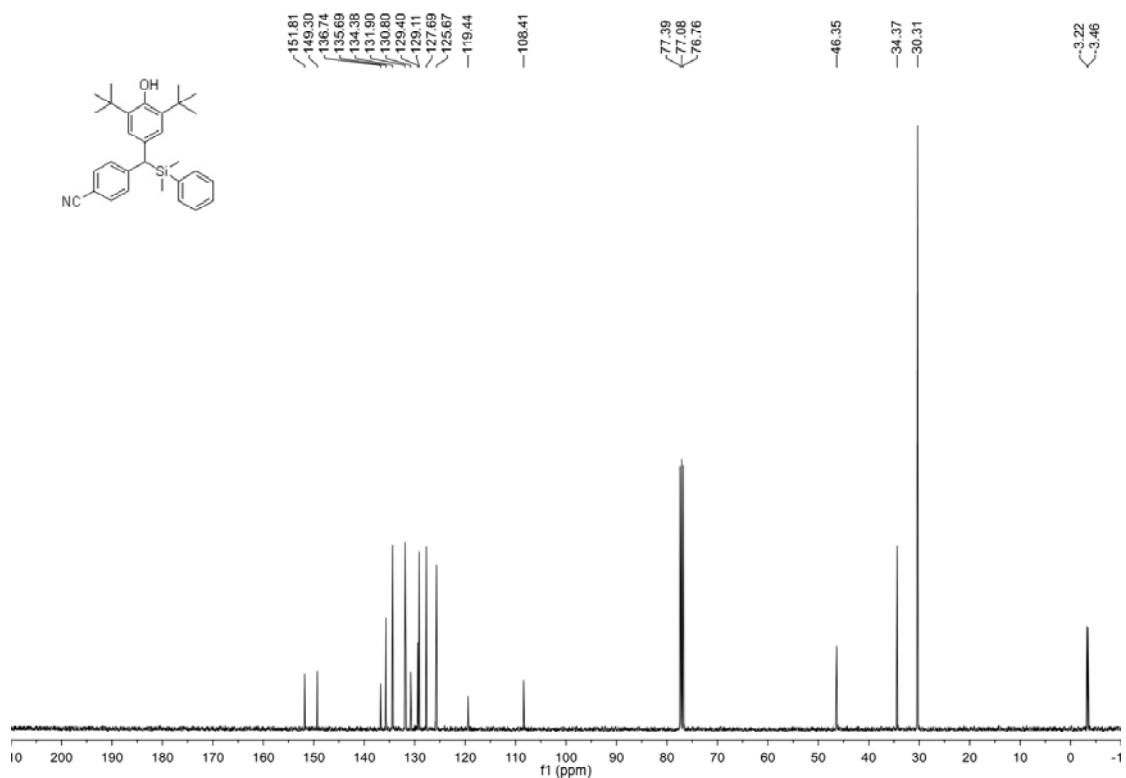

<sup>13</sup>C {<sup>1</sup>H} NMR (100 MHz, CDCl<sub>3</sub>) of compound **7u**

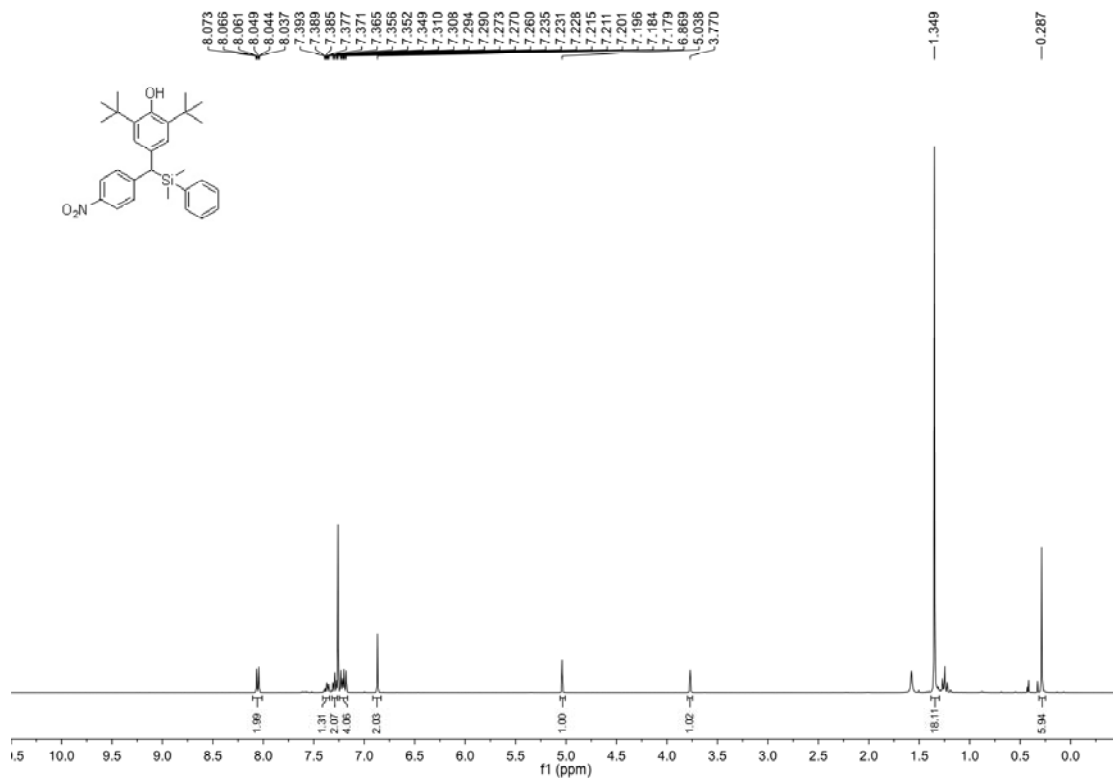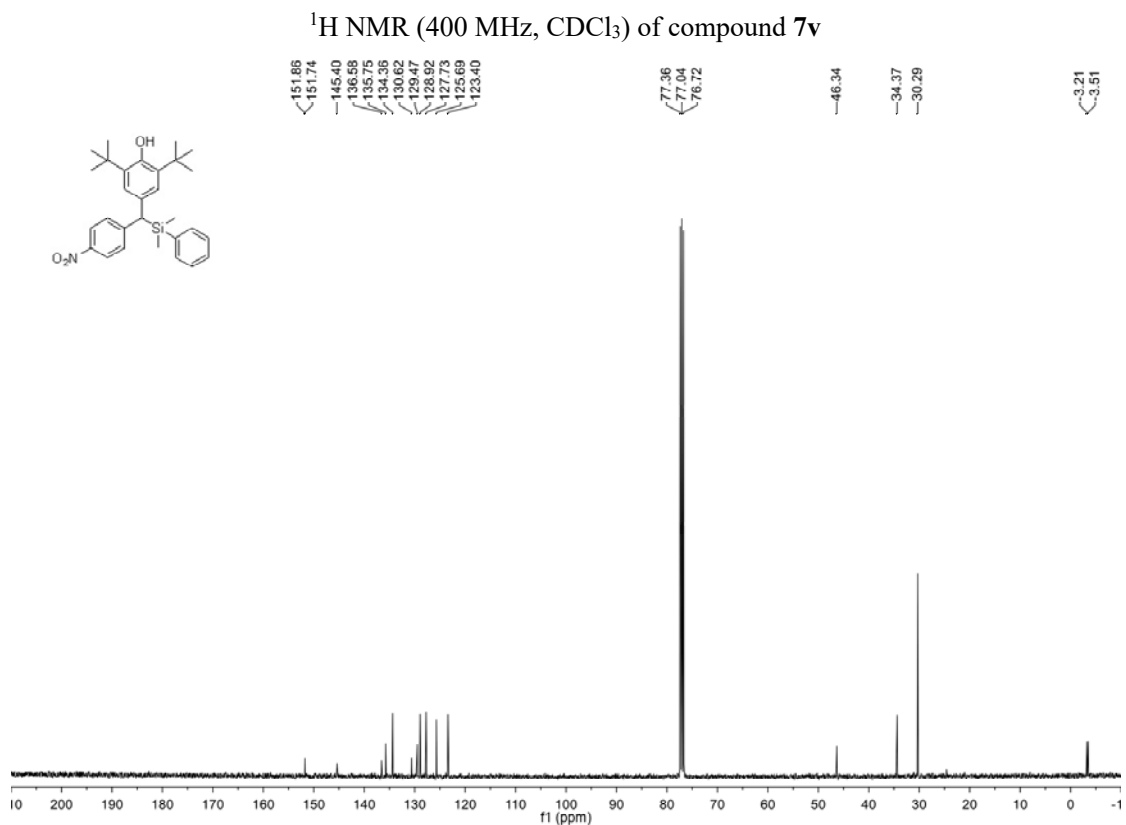

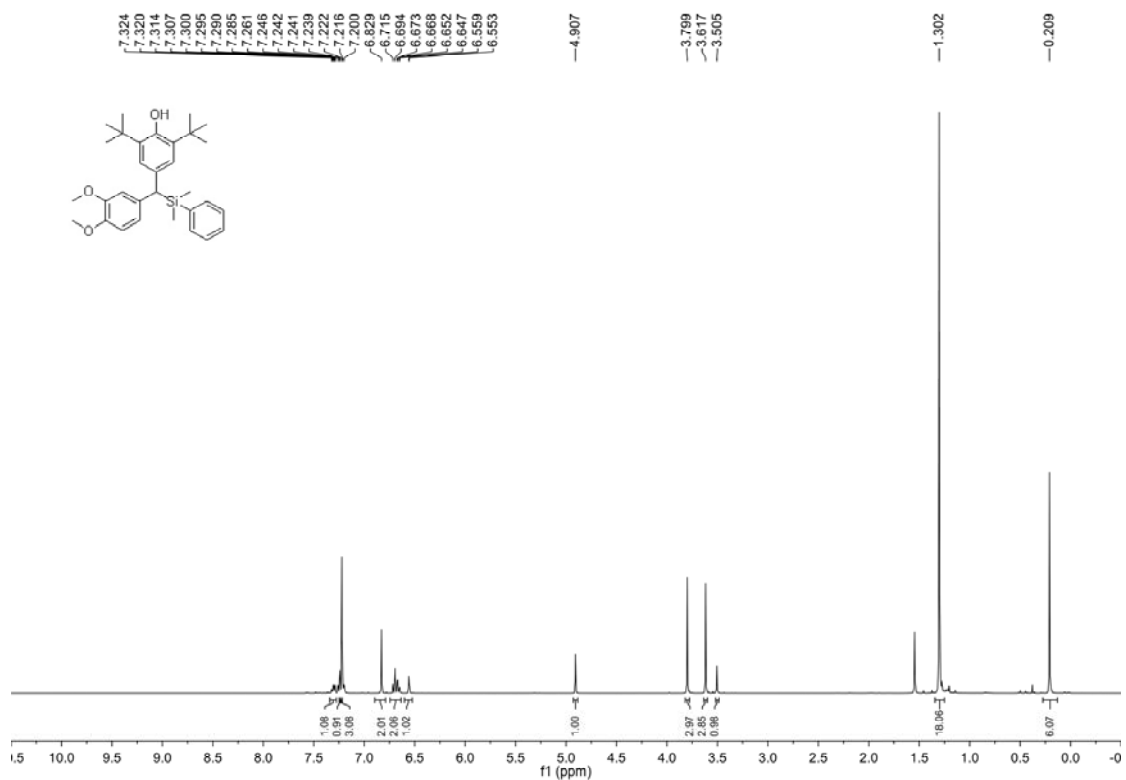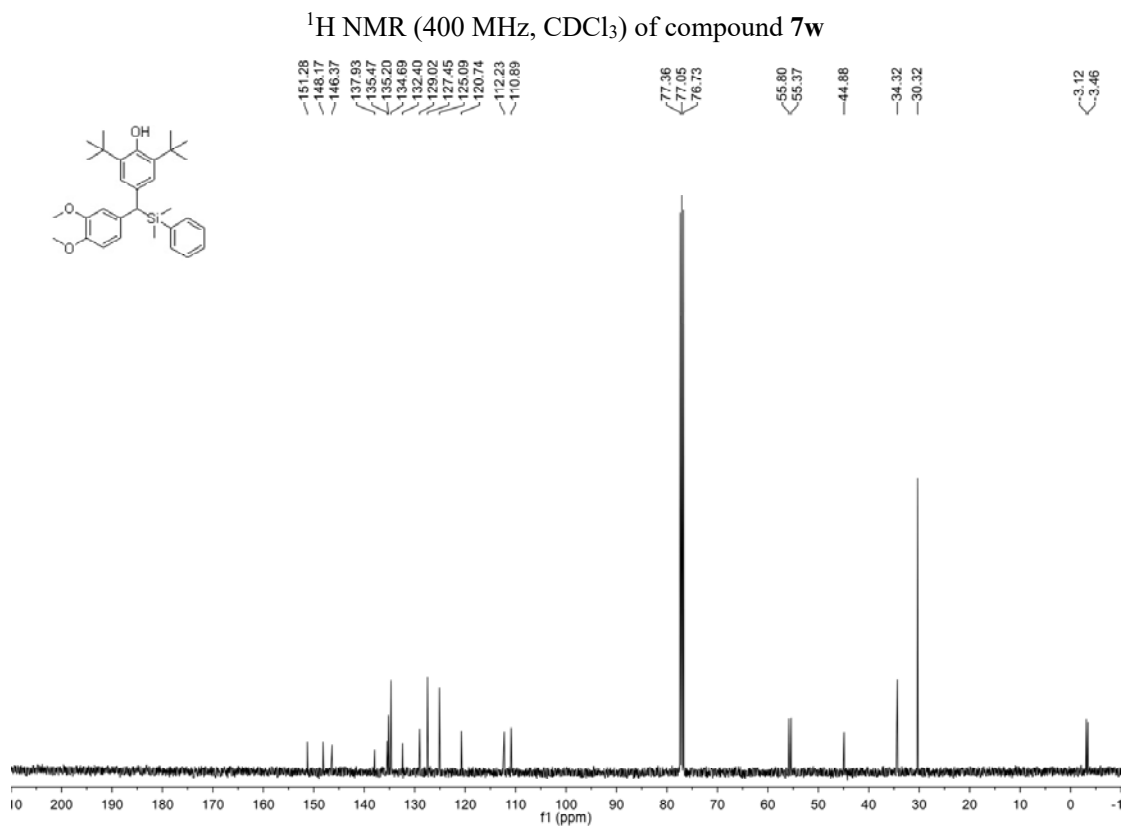



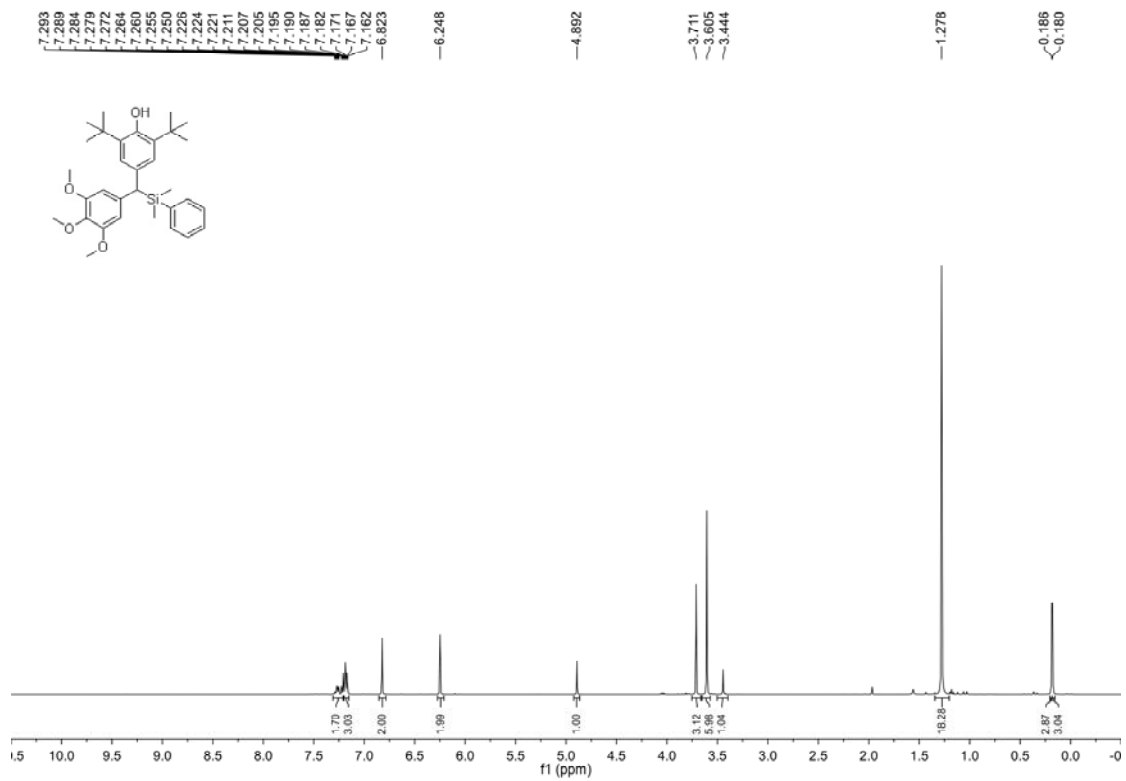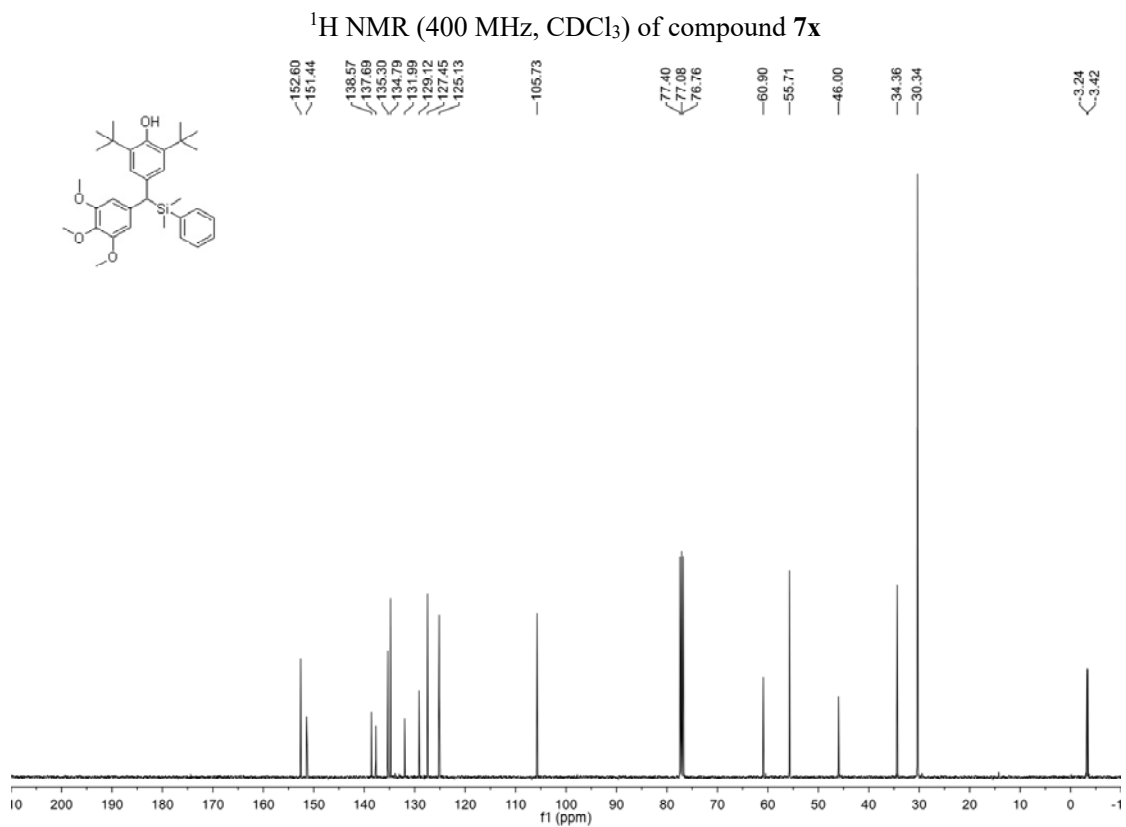

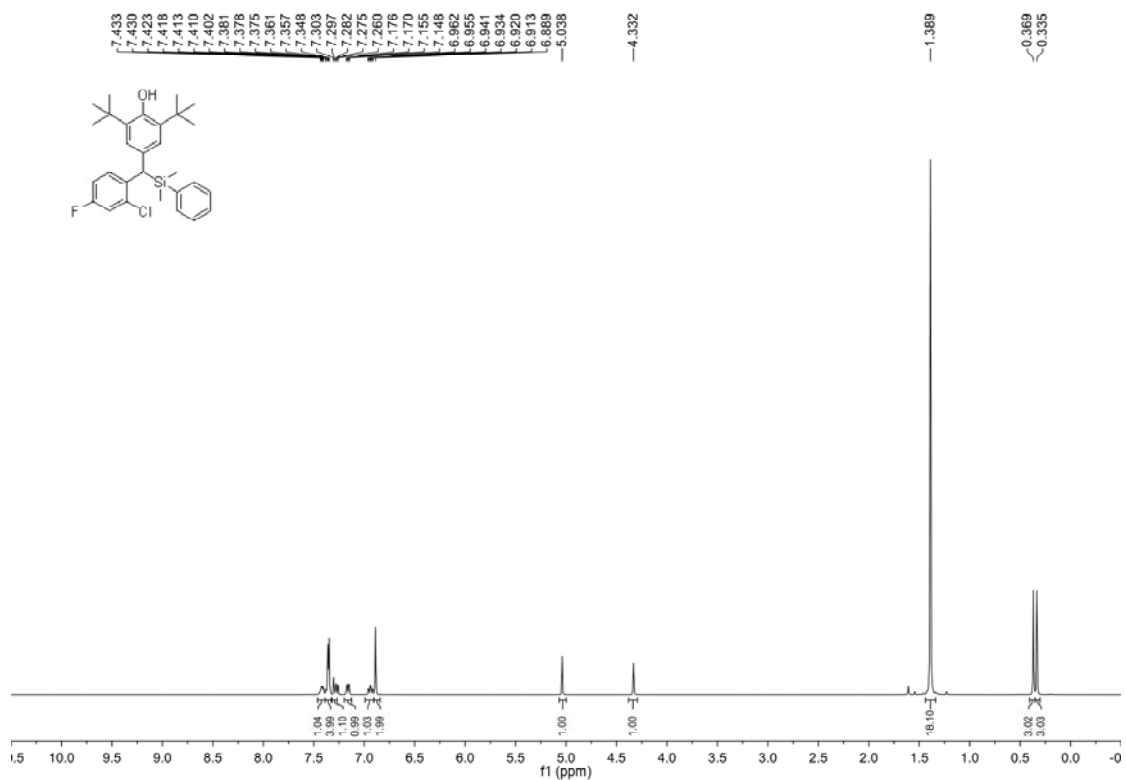

<sup>1</sup>H NMR (400 MHz, CDCl<sub>3</sub>) of compound **7y**

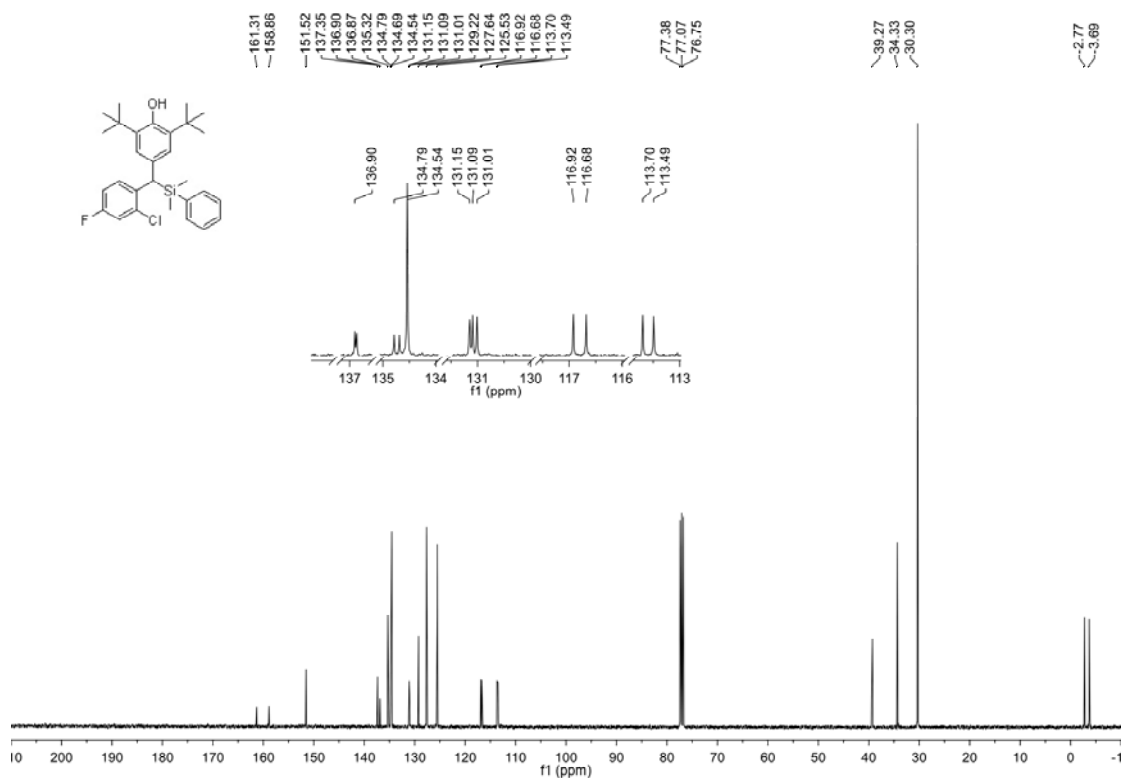

<sup>13</sup>C {<sup>1</sup>H} NMR (100 MHz, CDCl<sub>3</sub>) of compound **7y**

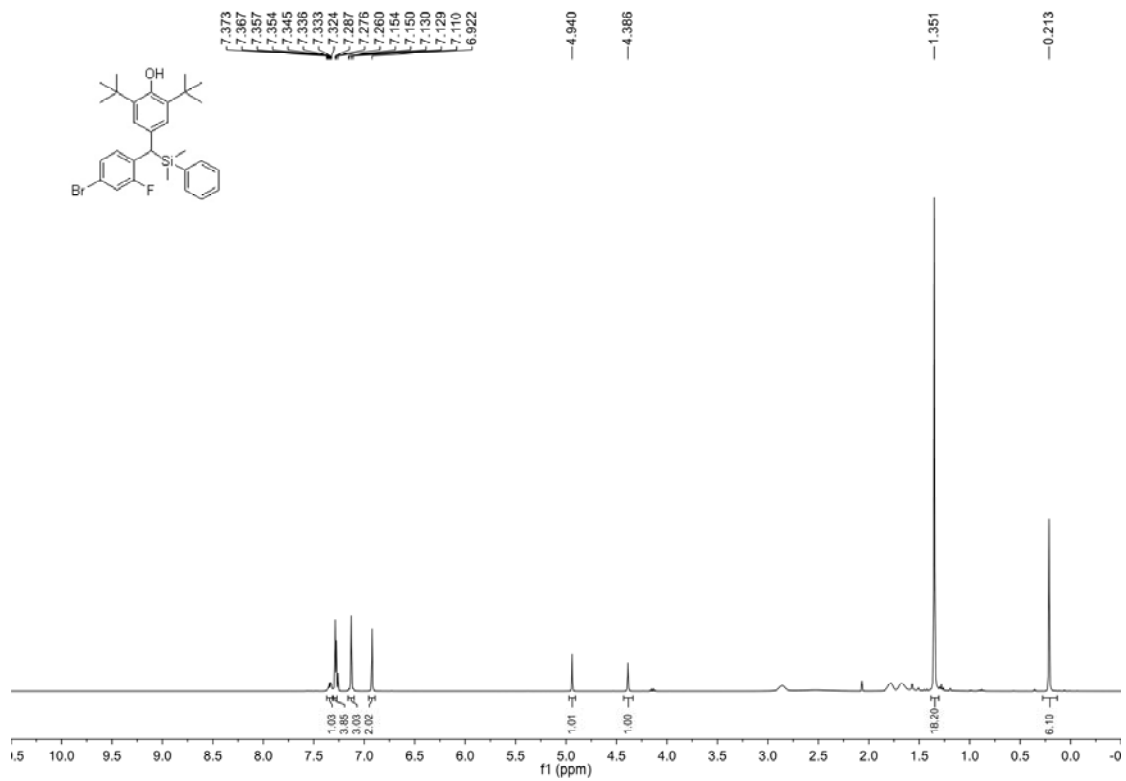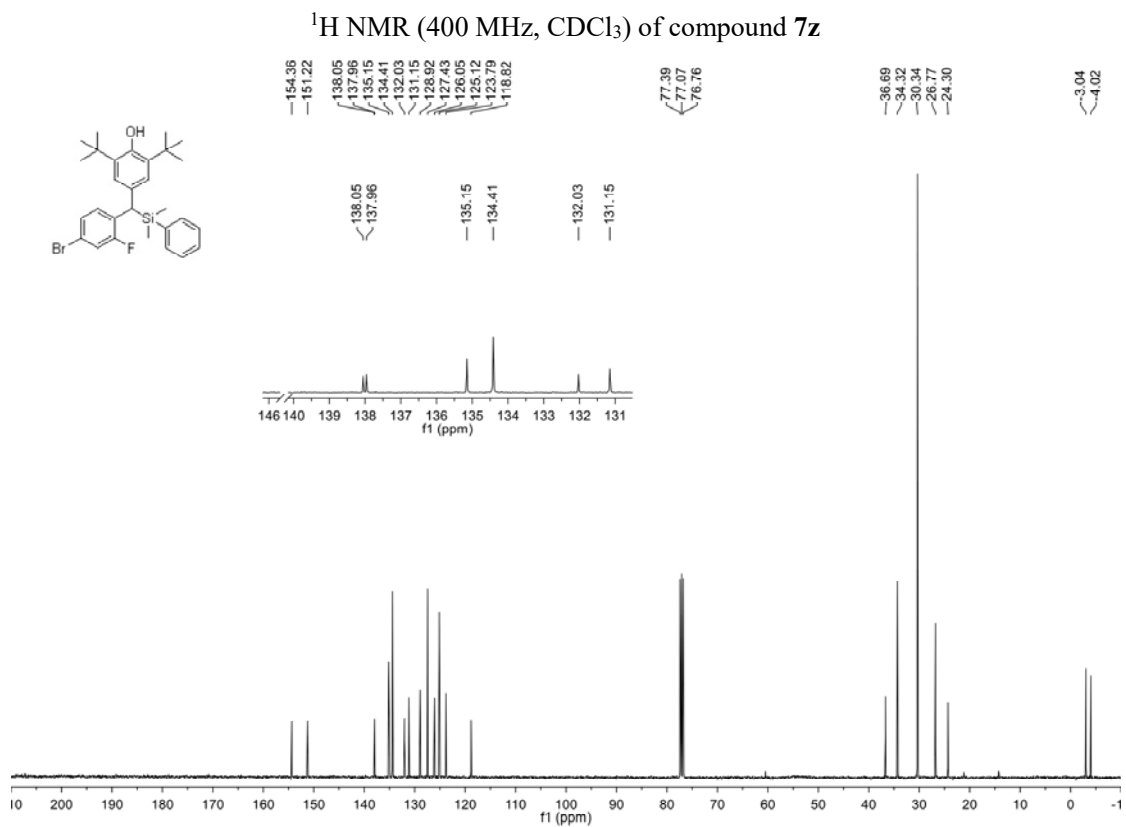

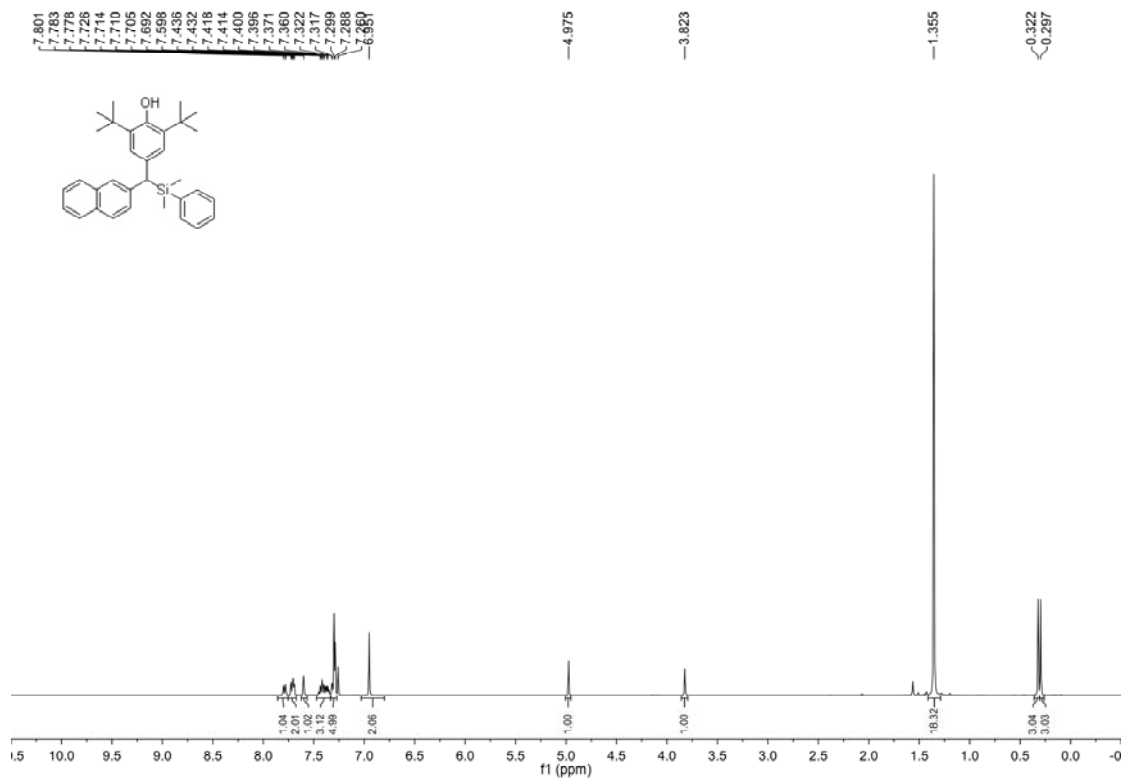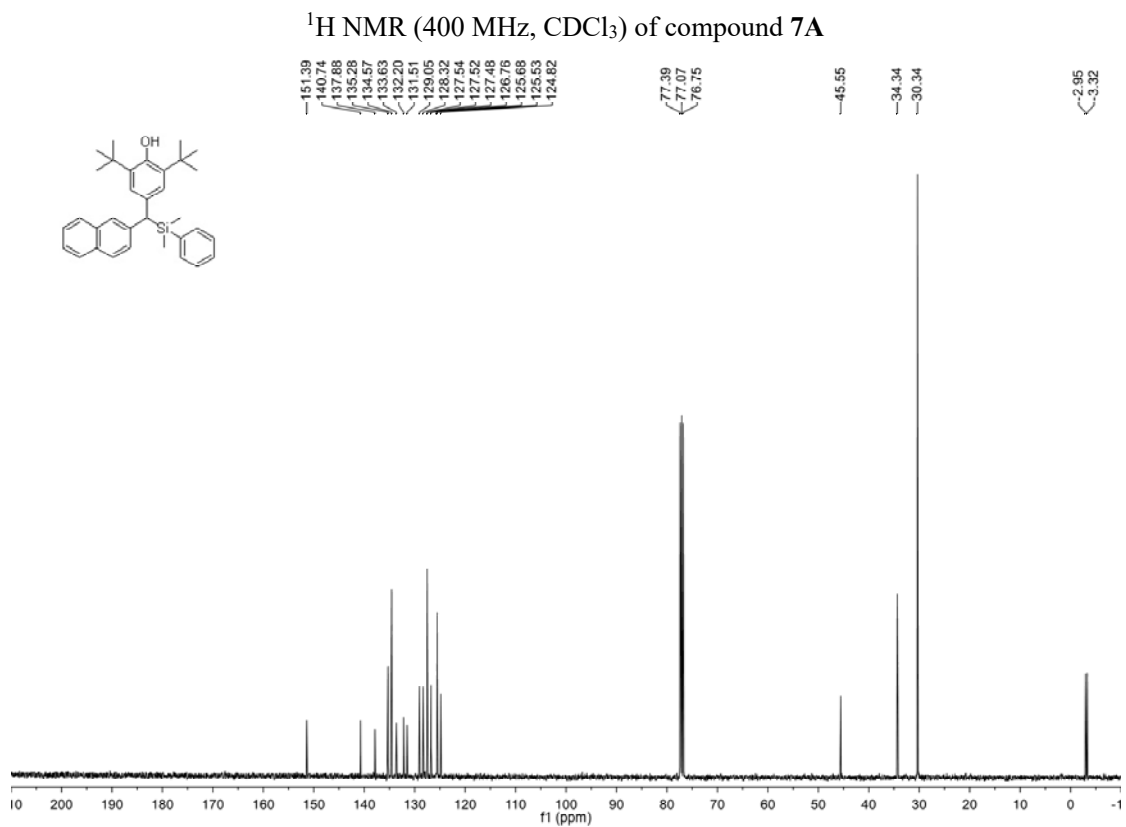

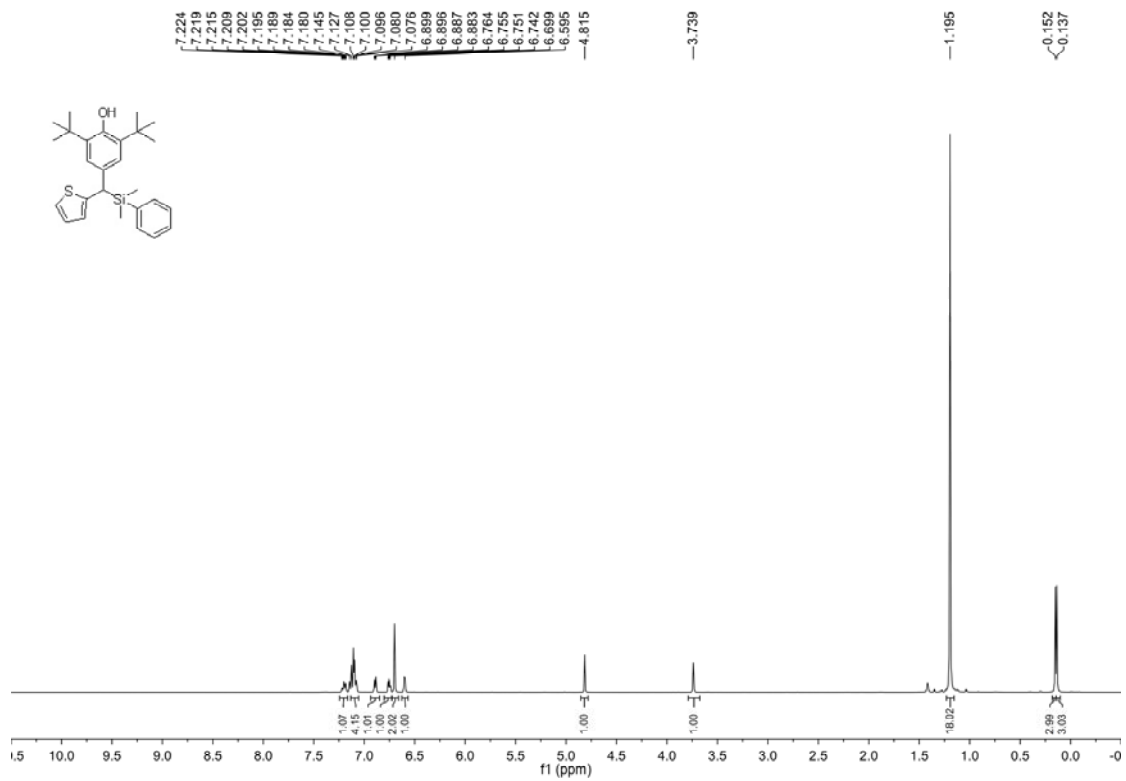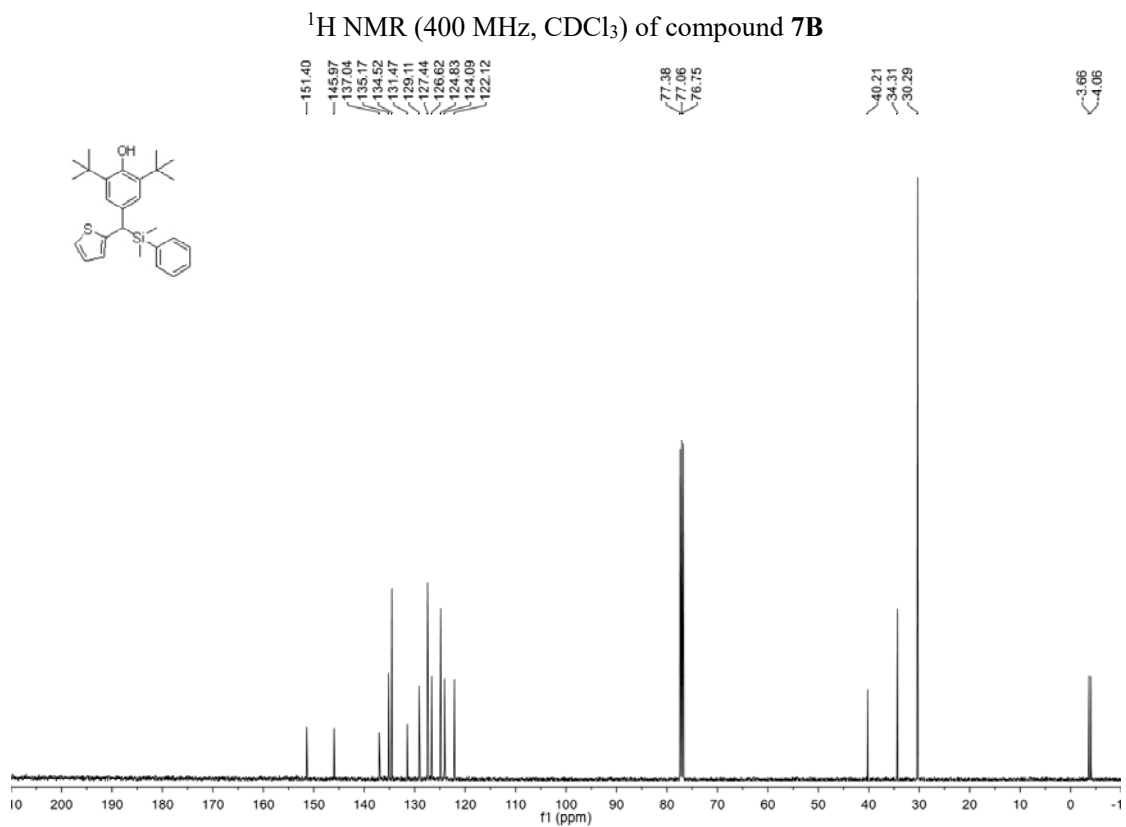

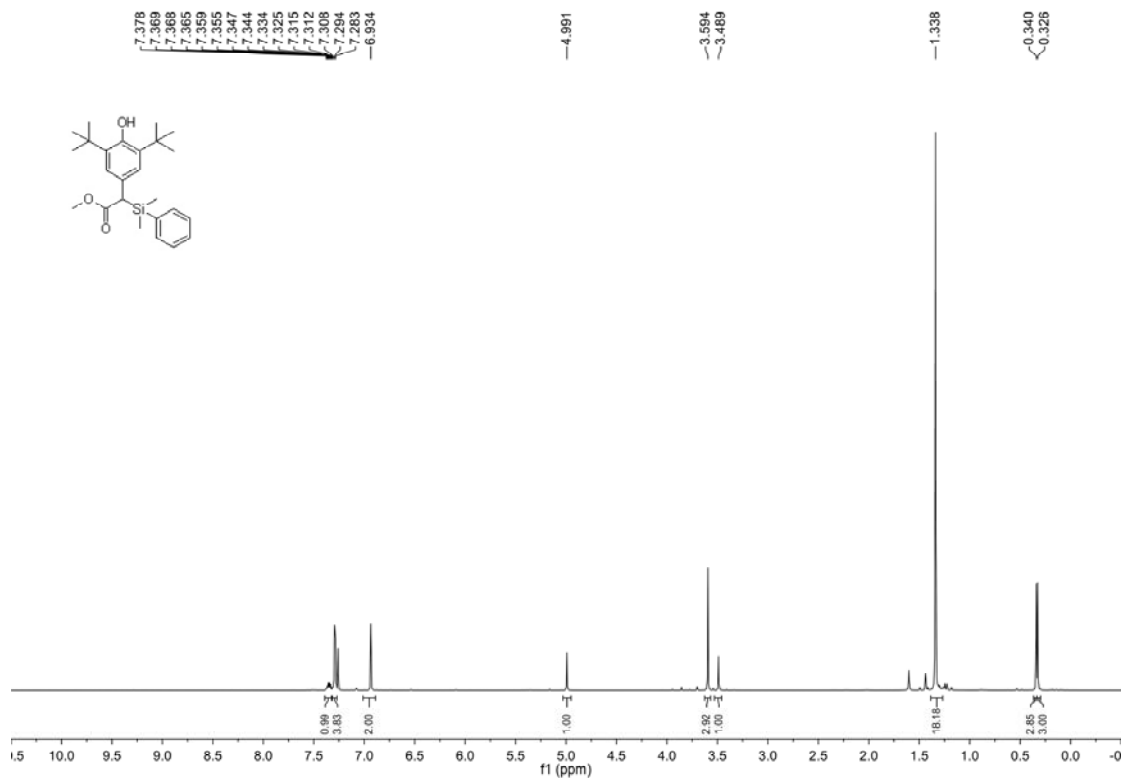

$^1\text{H}$  NMR (400 MHz,  $\text{CDCl}_3$ ) of compound **7C**

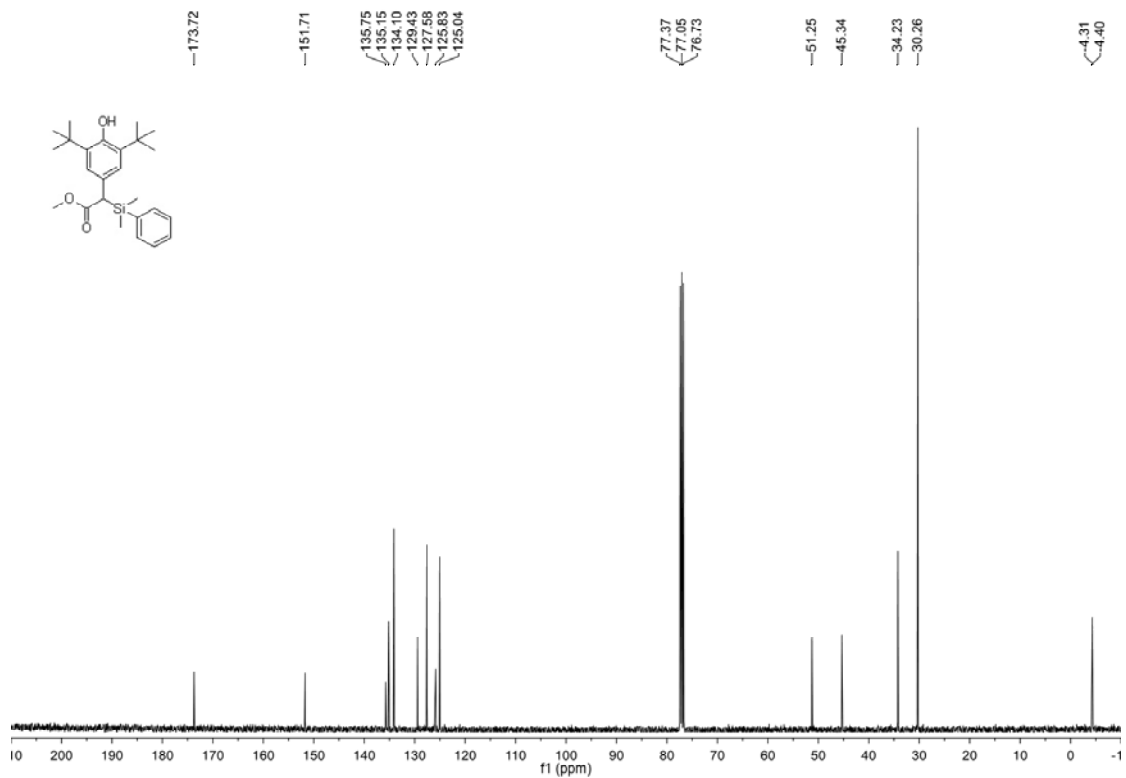

$^{13}\text{C}\{^1\text{H}\}$  NMR (100 MHz,  $\text{CDCl}_3$ ) of compound **7C**

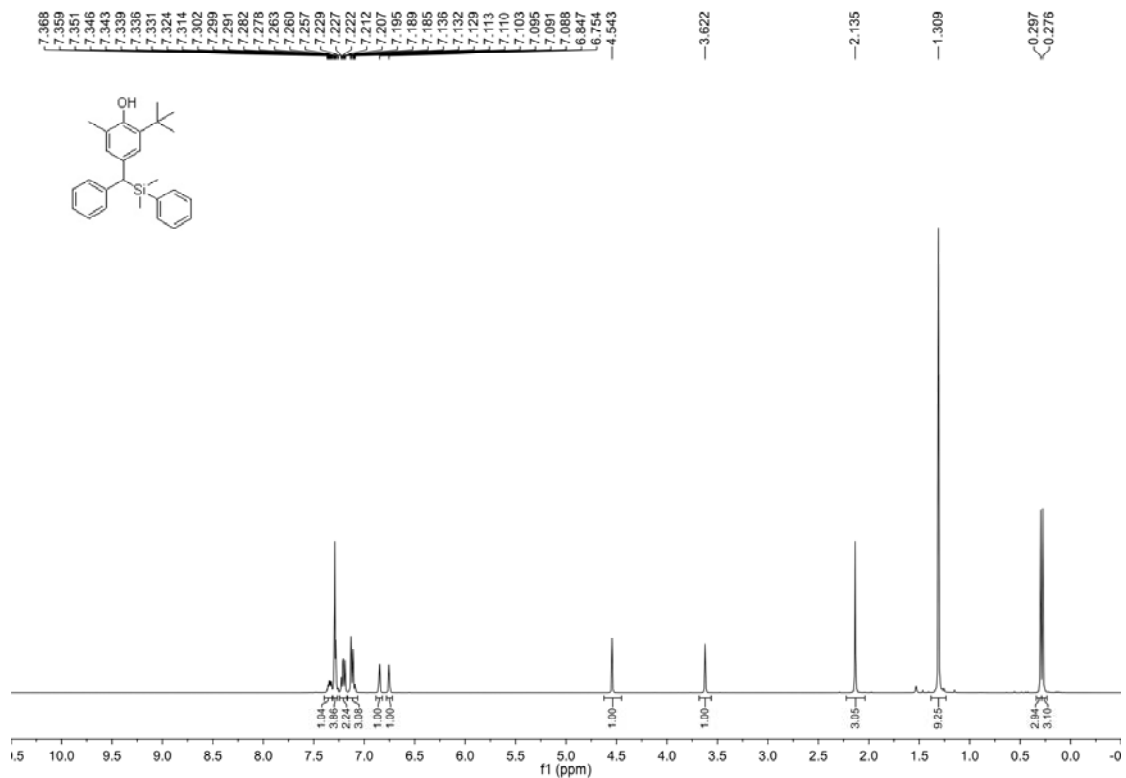

$^1\text{H NMR}$  (400 MHz,  $\text{CDCl}_3$ ) of compound 7D

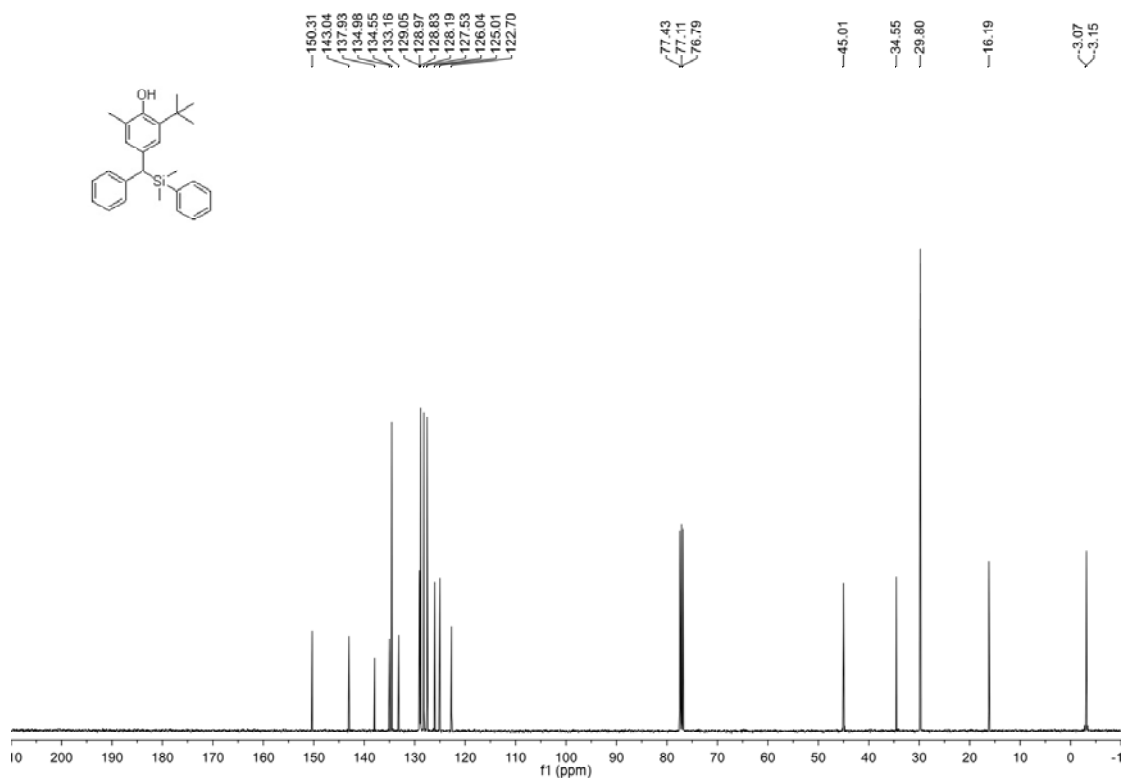

$^{13}\text{C}\{^1\text{H}\}$  NMR (100 MHz,  $\text{CDCl}_3$ ) of compound 7D

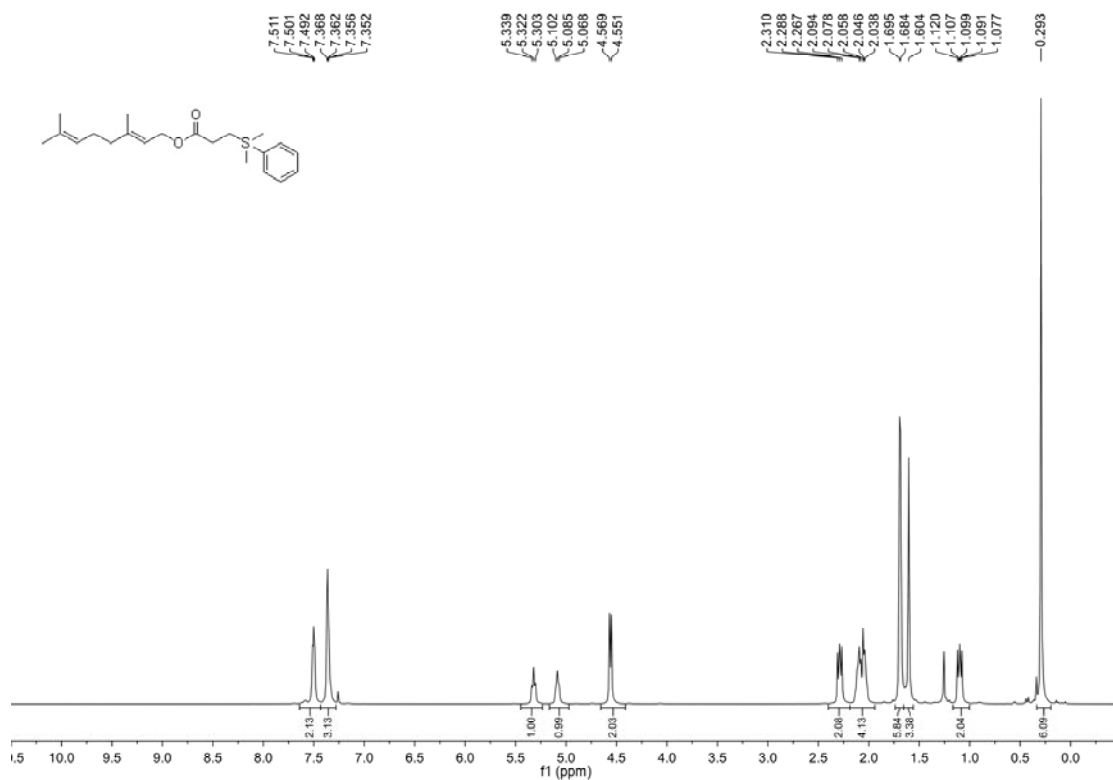

$^1\text{H NMR}$  (400 MHz,  $\text{CDCl}_3$ ) of compound **9a**

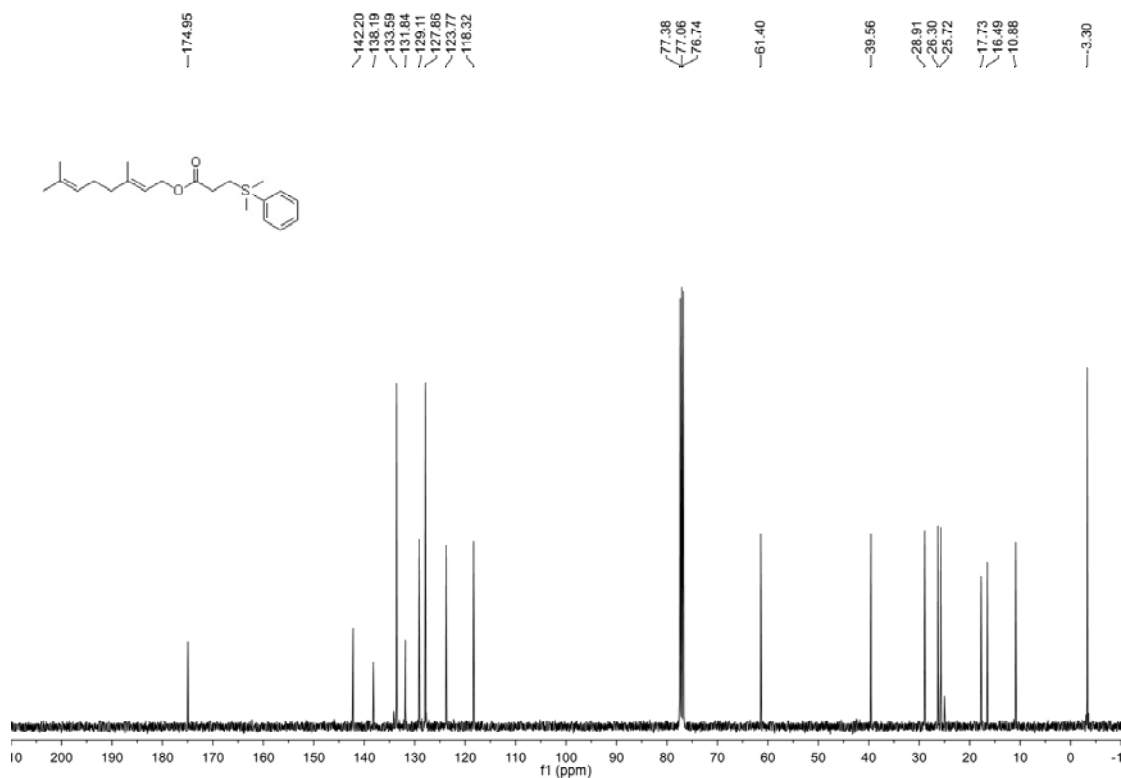

$^{13}\text{C}\{^1\text{H}\}$  NMR (100 MHz,  $\text{CDCl}_3$ ) of compound **9a**



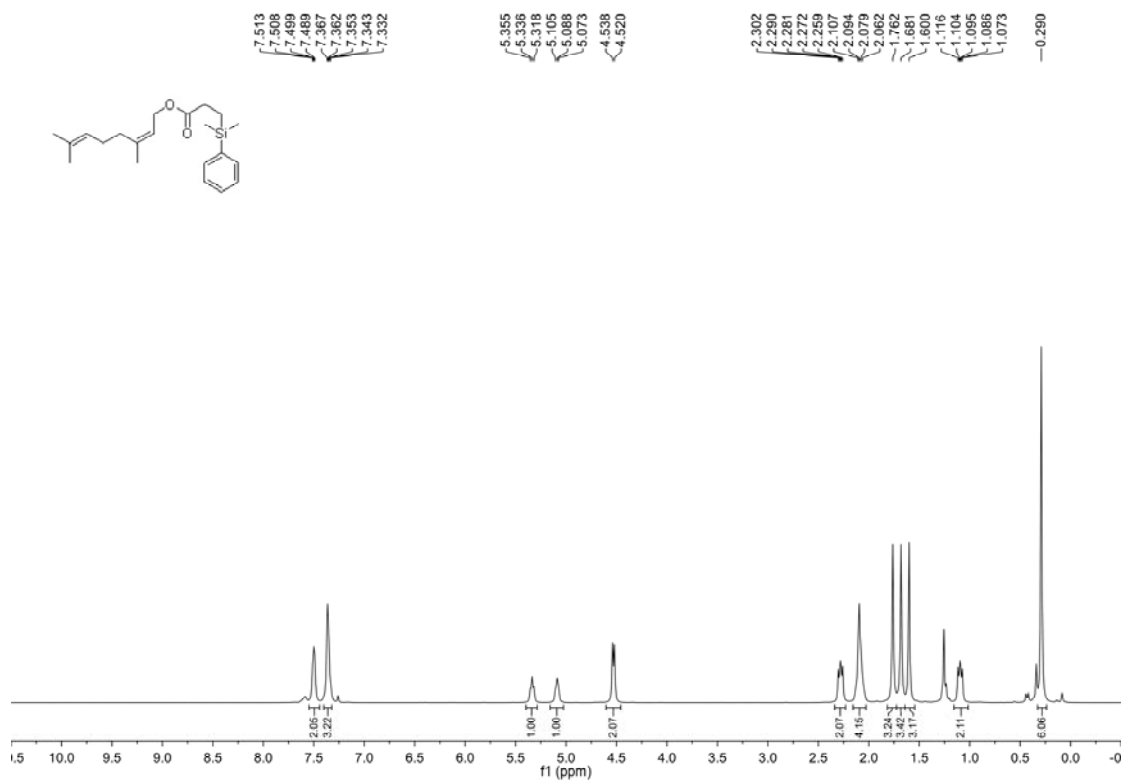

$^1\text{H NMR}$  (400 MHz,  $\text{CDCl}_3$ ) of compound **9b**

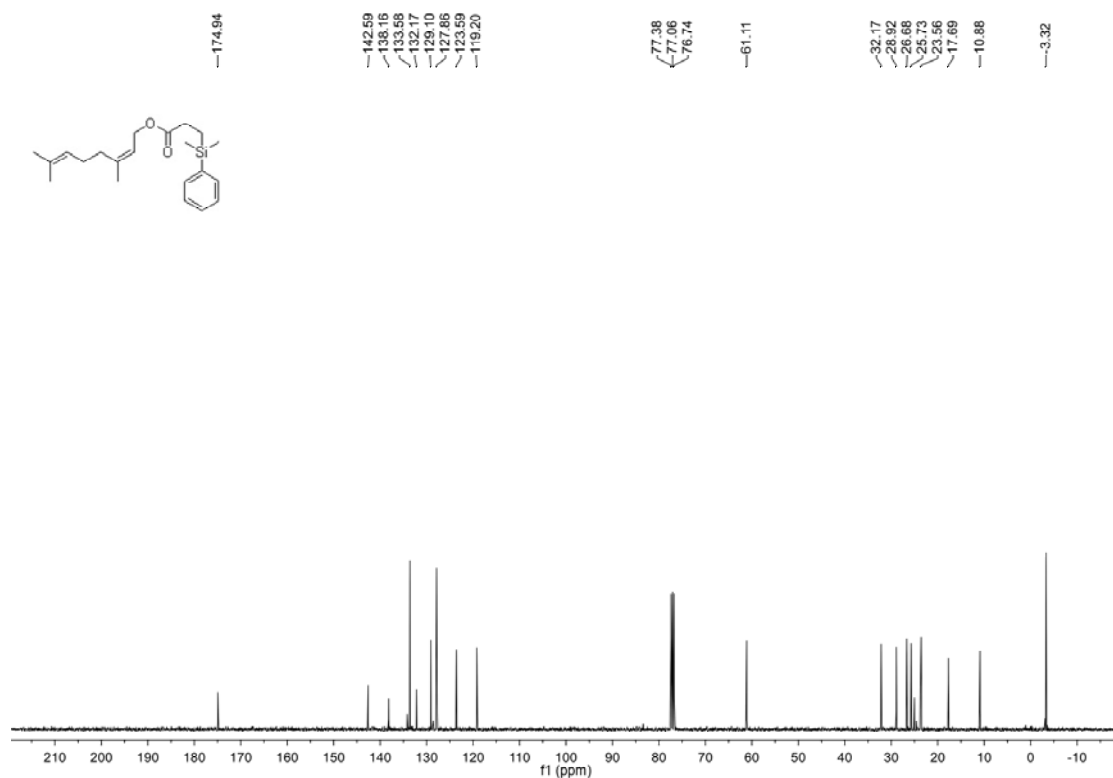

$^{13}\text{C}\{^1\text{H}\}$  NMR (100 MHz,  $\text{CDCl}_3$ ) of compound **9b**

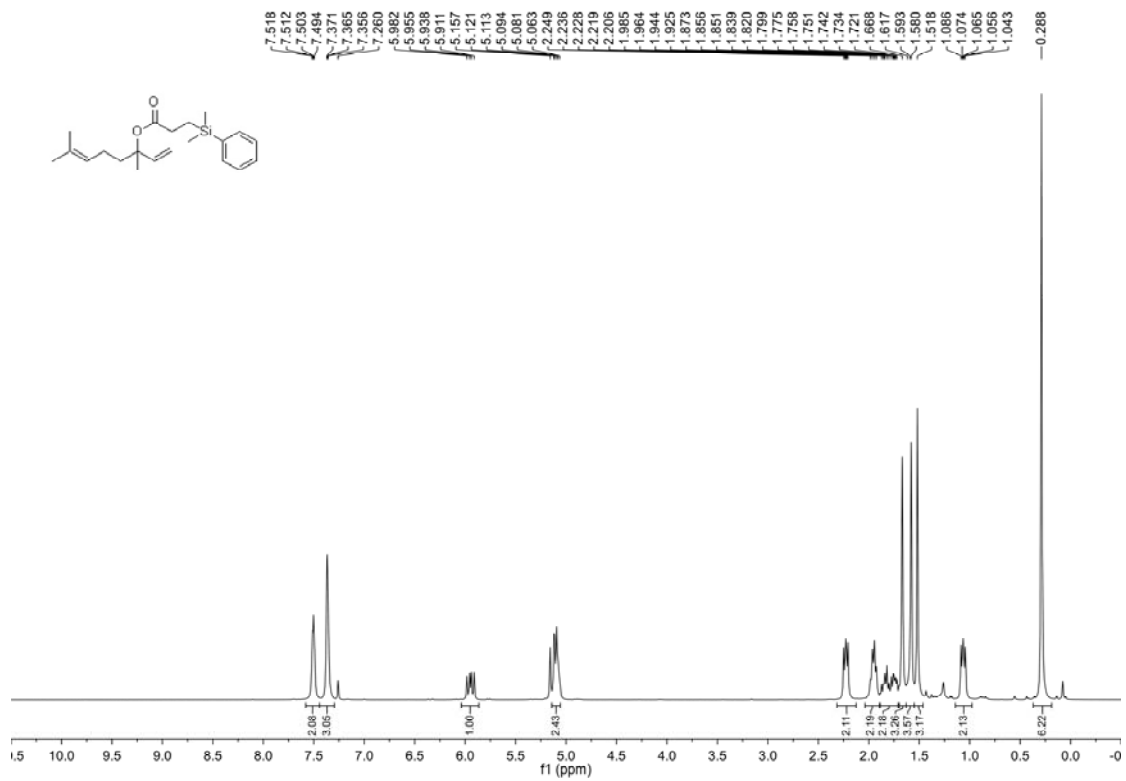

$^1\text{H NMR}$  (400 MHz,  $\text{CDCl}_3$ ) of compound **9c**

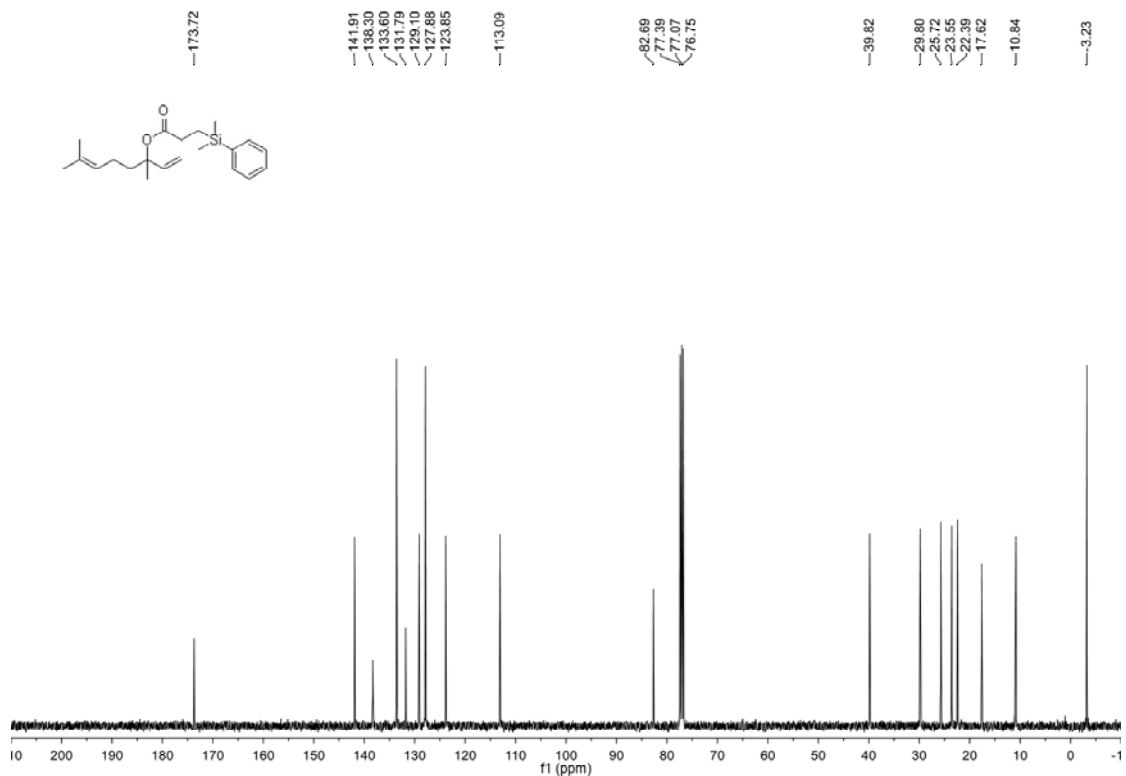

$^{13}\text{C}\{^1\text{H}\}$  NMR (100 MHz,  $\text{CDCl}_3$ ) of compound **9c**

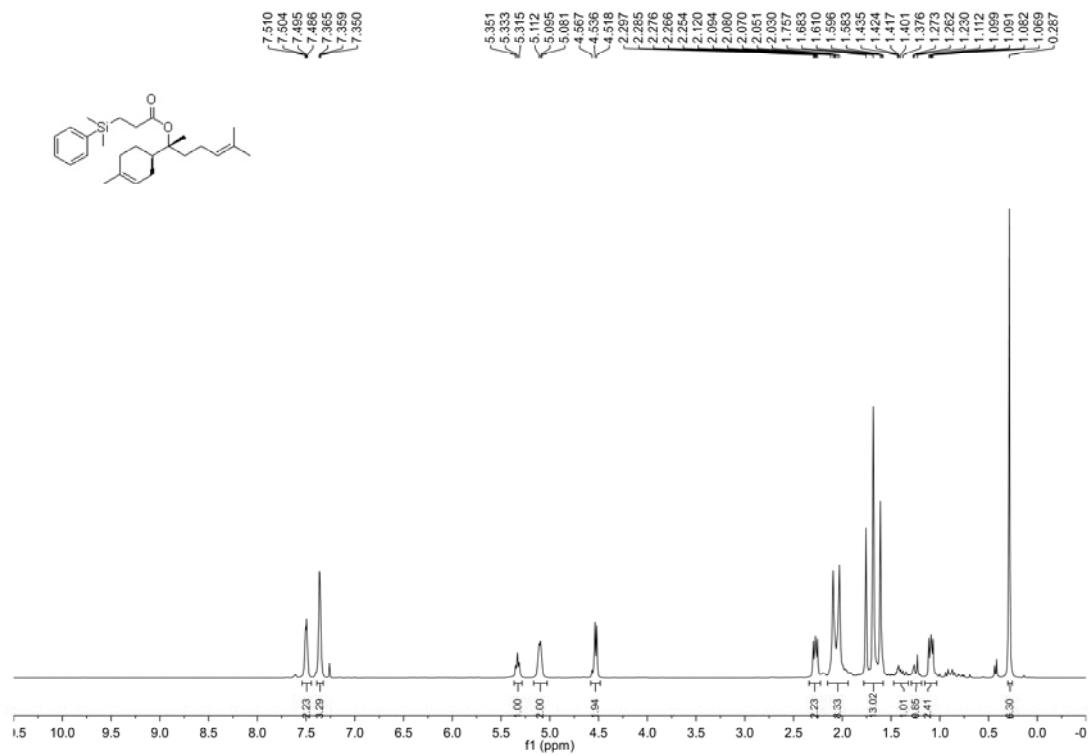

<sup>1</sup>H NMR (400 MHz, CDCl<sub>3</sub>) of compound **9d**

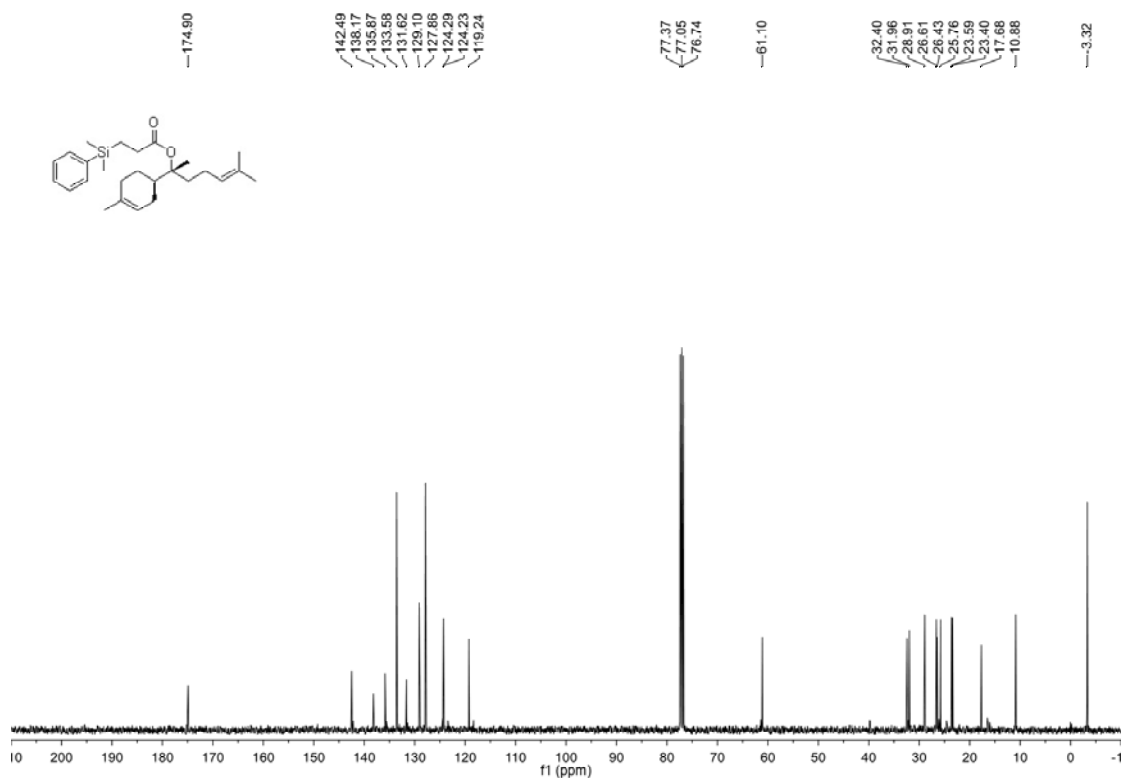

<sup>13</sup>C{<sup>1</sup>H} NMR (100 MHz, CDCl<sub>3</sub>) of compound **9d**

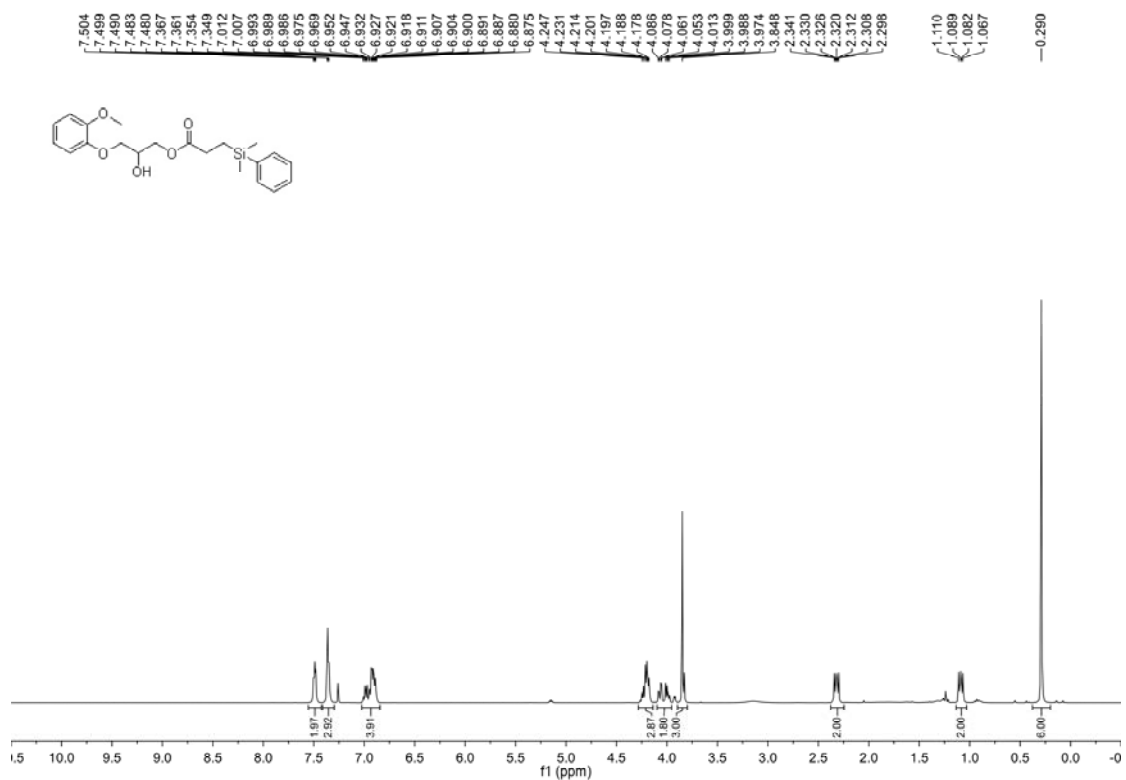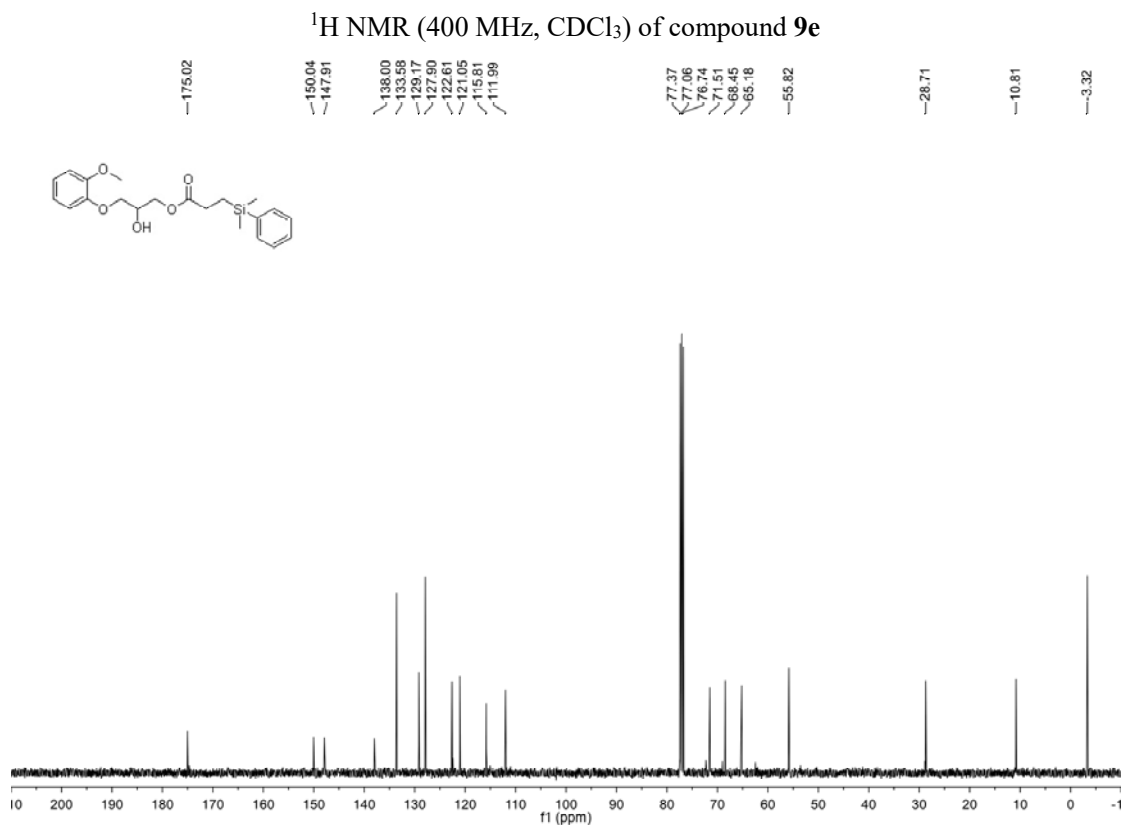

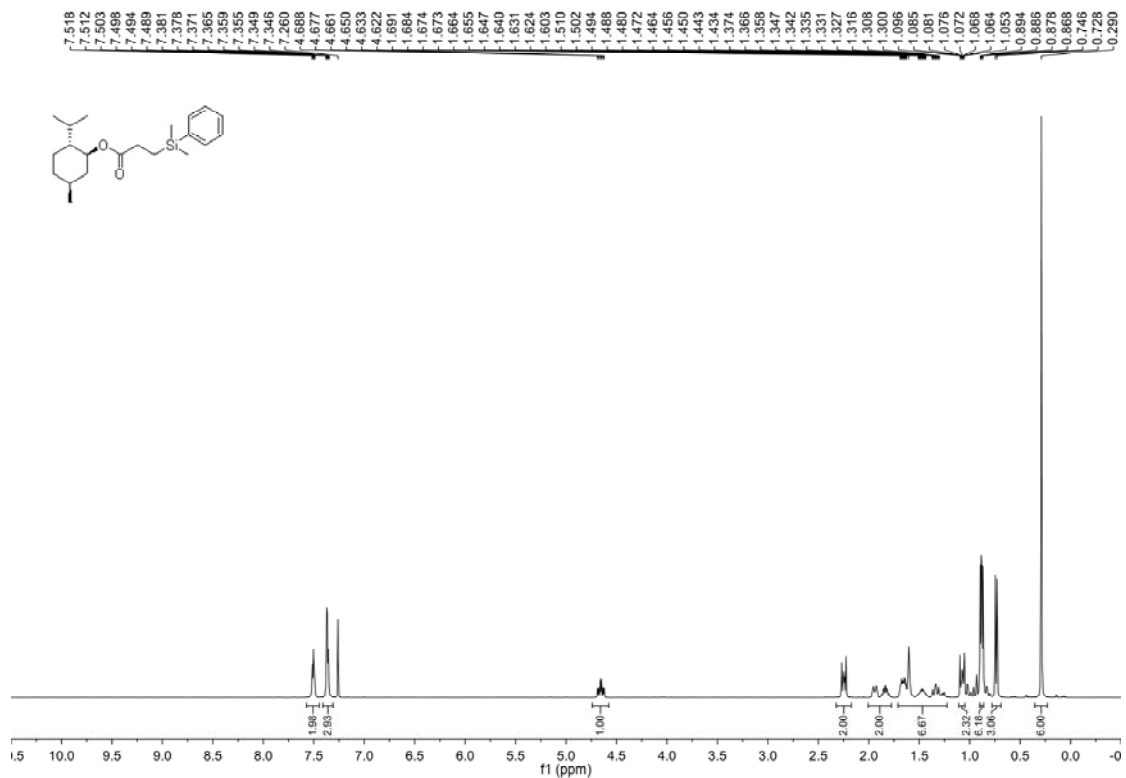

<sup>1</sup>H NMR (400 MHz, CDCl<sub>3</sub>) of compound **9f**

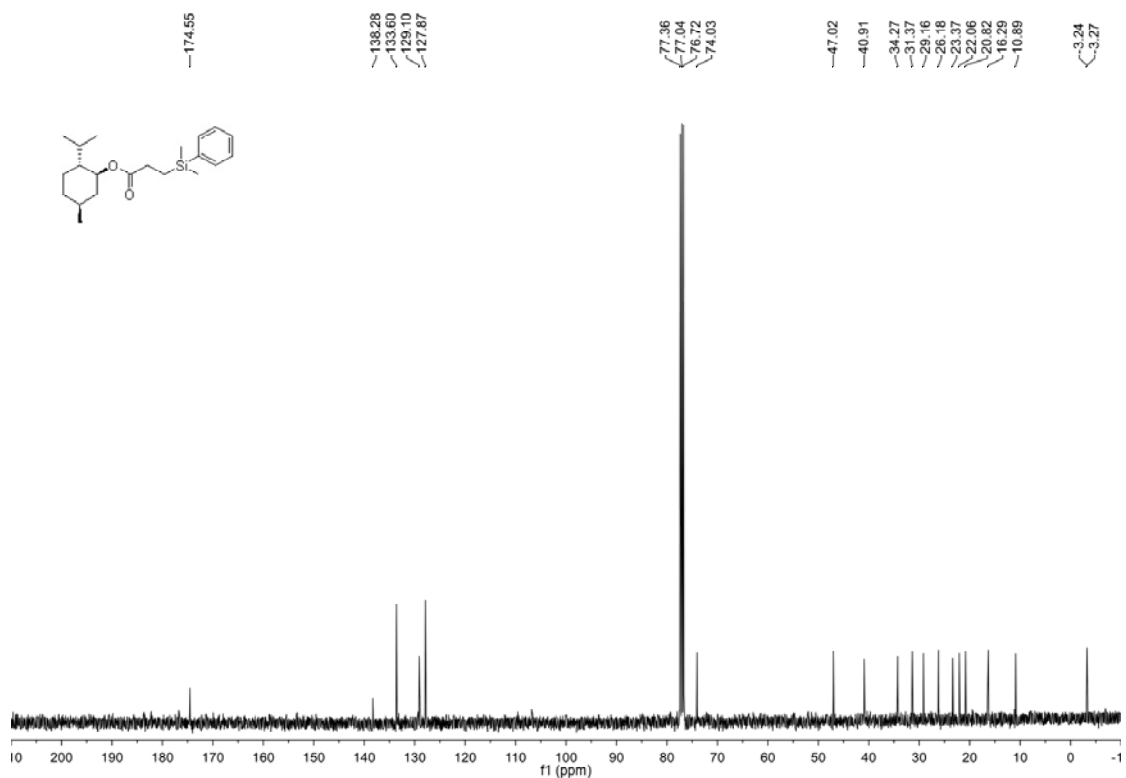

<sup>13</sup>C {<sup>1</sup>H} NMR (100 MHz, CDCl<sub>3</sub>) of compound **9f**

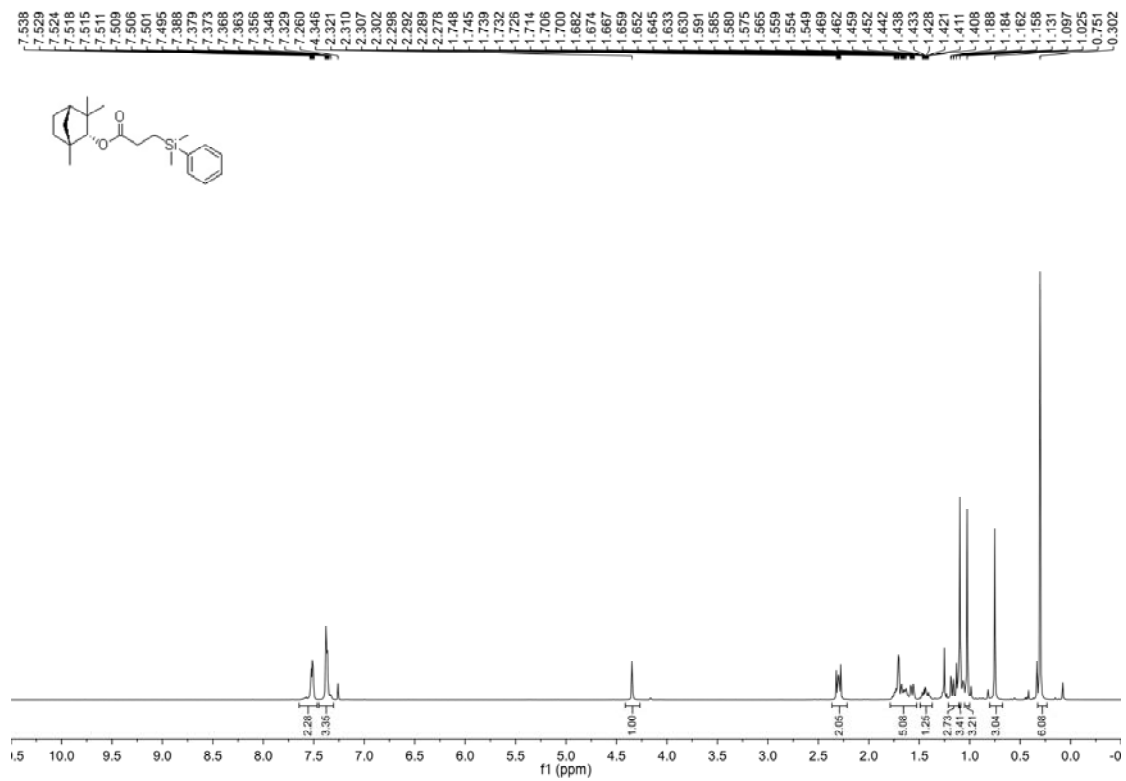

$^1\text{H}$  NMR (400 MHz,  $\text{CDCl}_3$ ) of compound **9g**

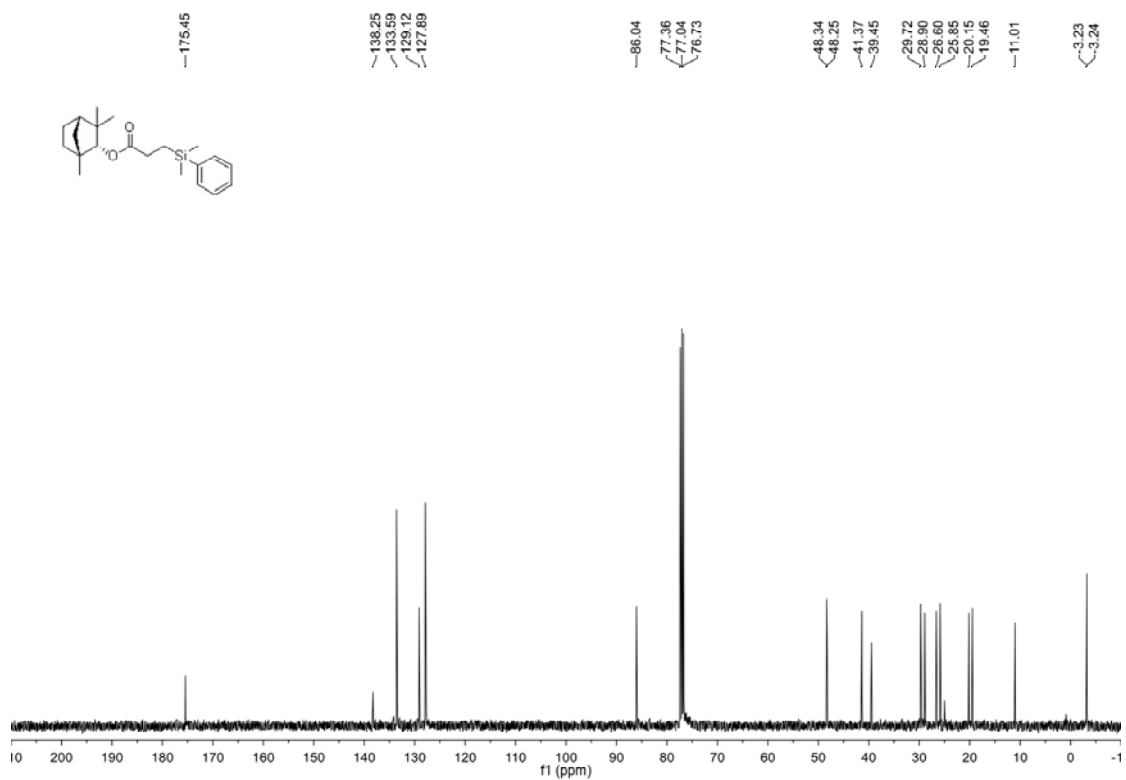

$^{13}\text{C}\{^1\text{H}\}$  NMR (100 MHz,  $\text{CDCl}_3$ ) of compound **9g**

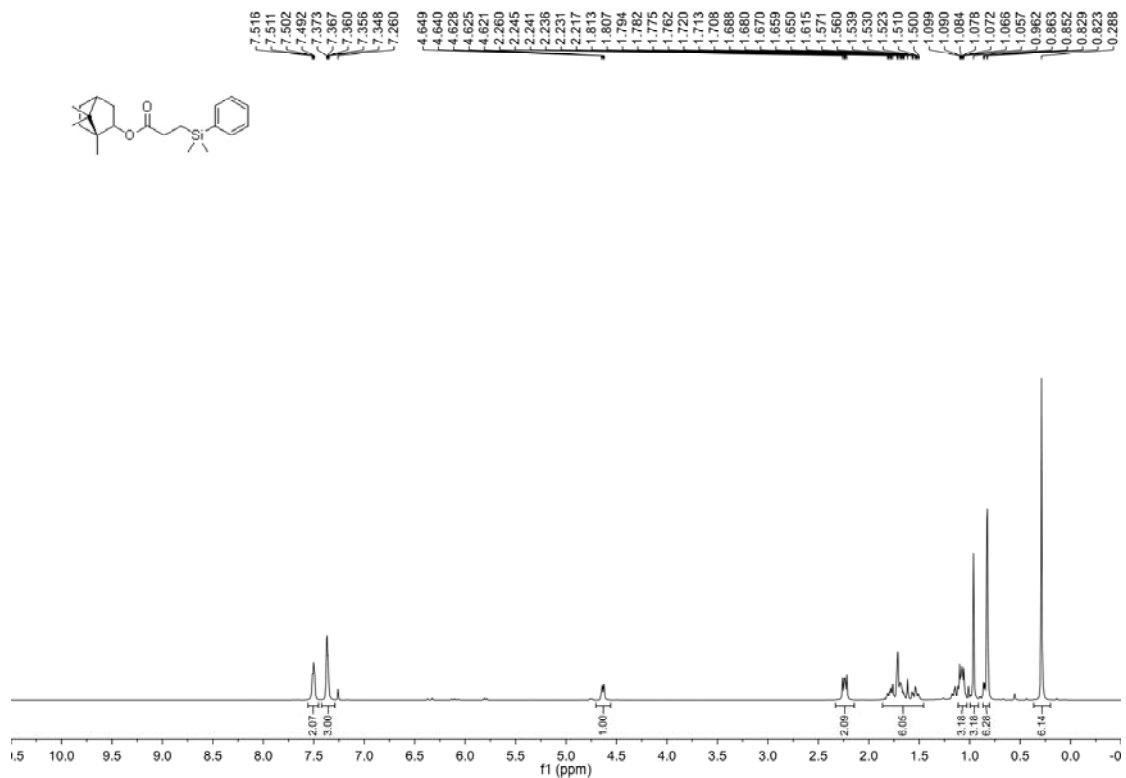

<sup>1</sup>H NMR (400 MHz, CDCl<sub>3</sub>) of compound **9h**

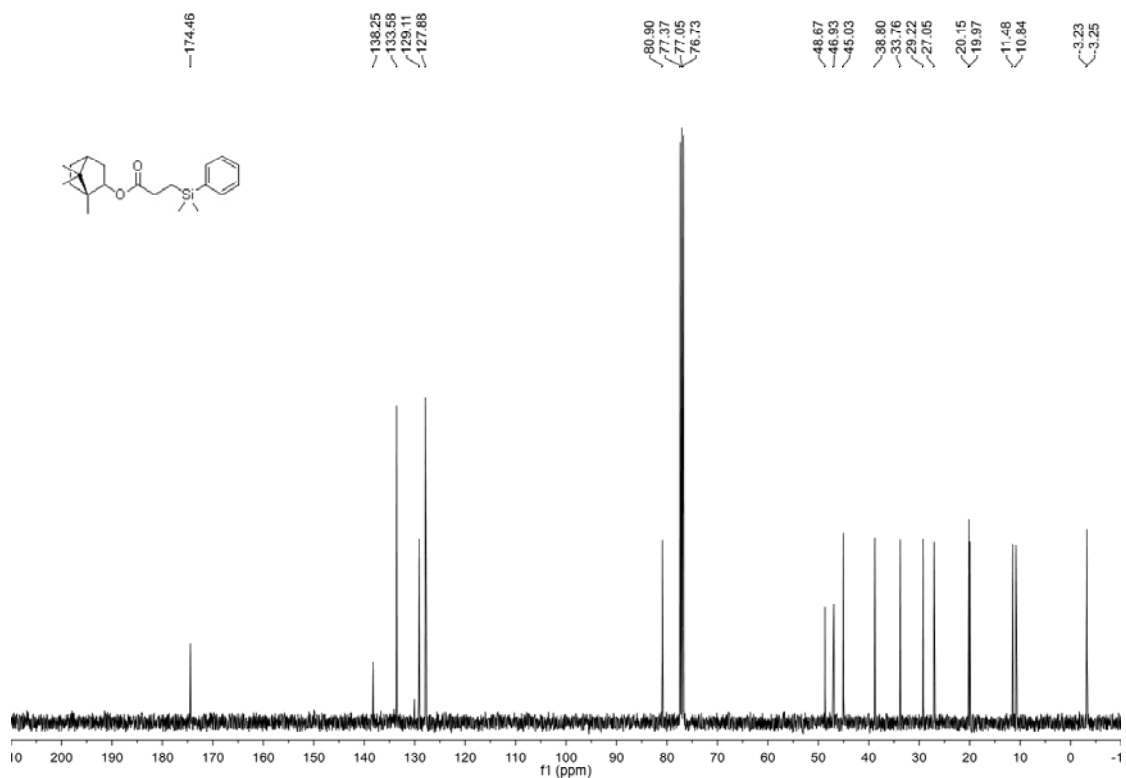

<sup>13</sup>C {<sup>1</sup>H} NMR (100 MHz, CDCl<sub>3</sub>) of compound **9h**

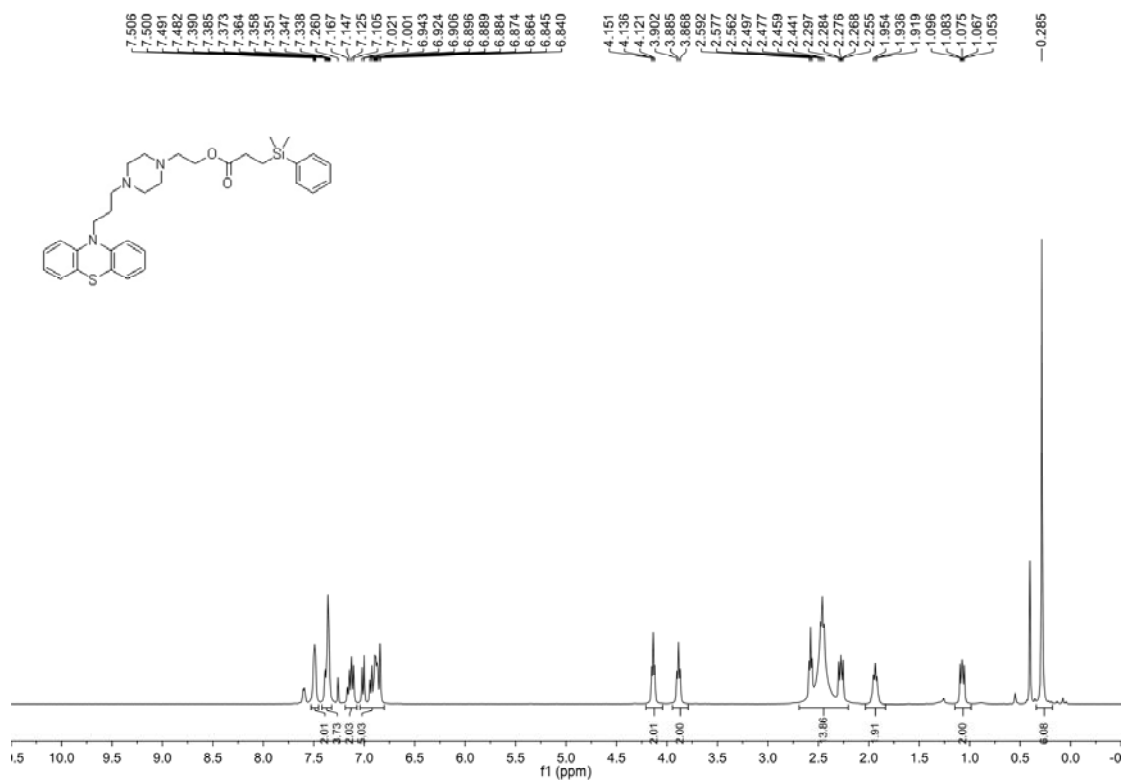

<sup>1</sup>H NMR (400 MHz, CDCl<sub>3</sub>) of compound **9i**

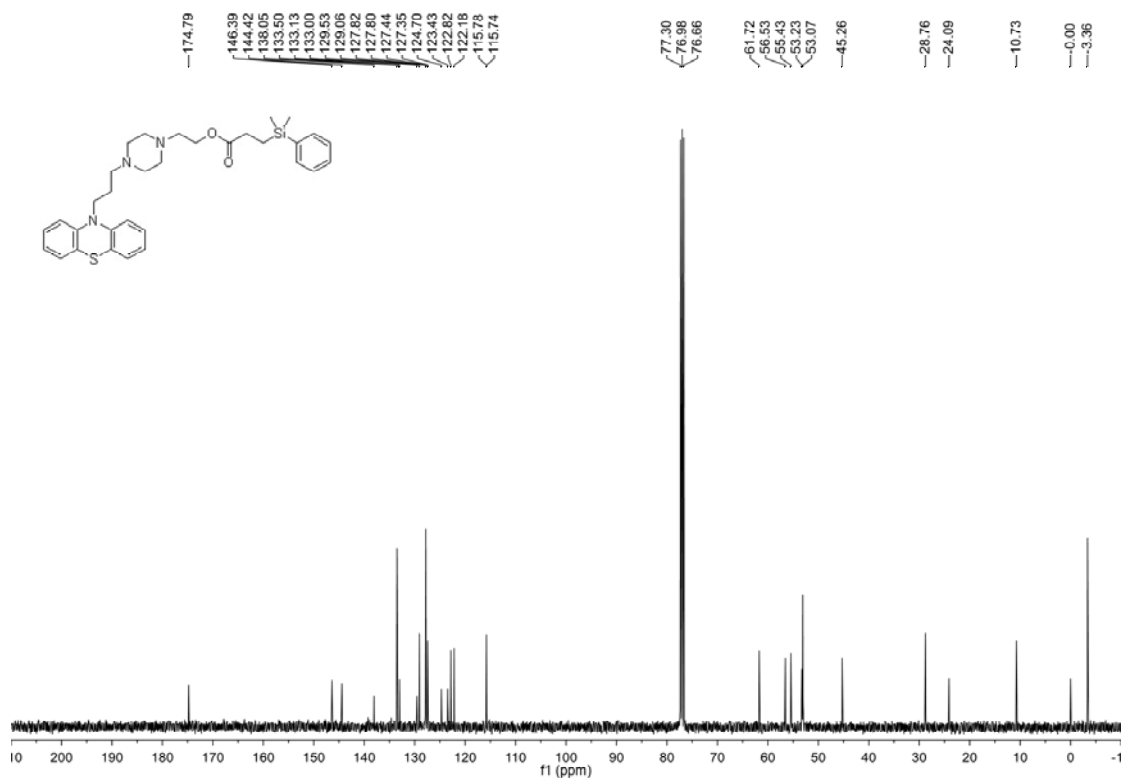

<sup>13</sup>C NMR (100 MHz, CDCl<sub>3</sub>) of compound **9i**



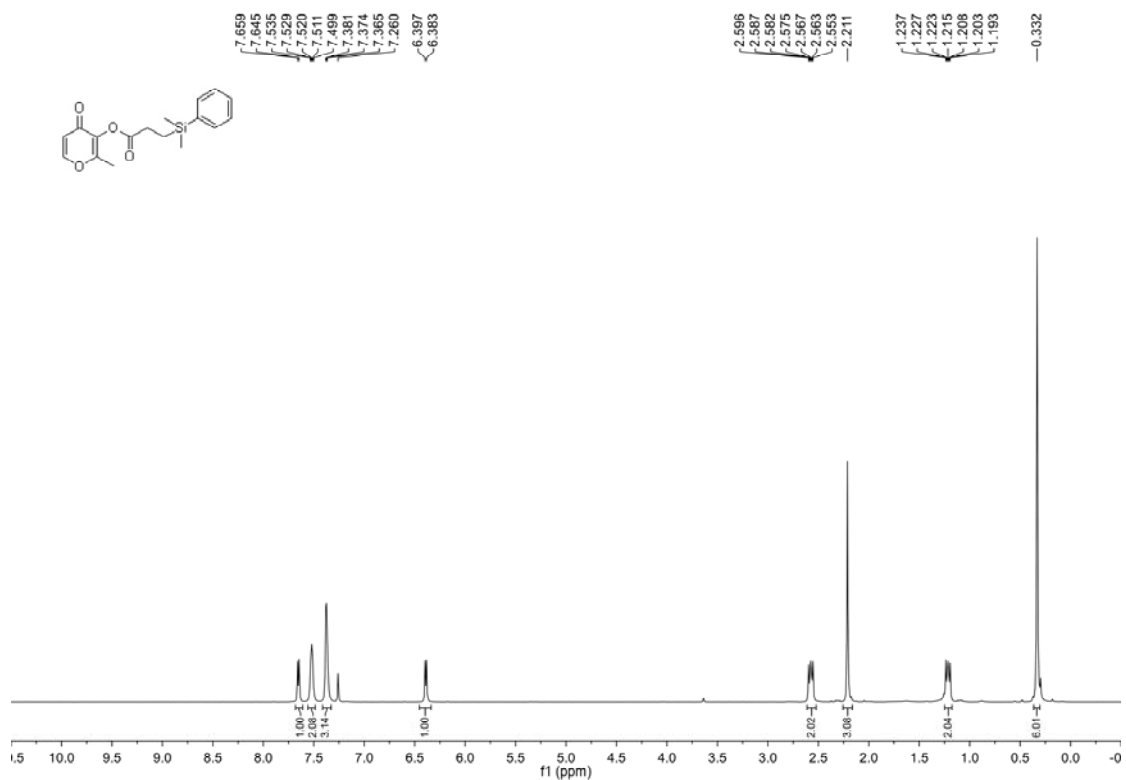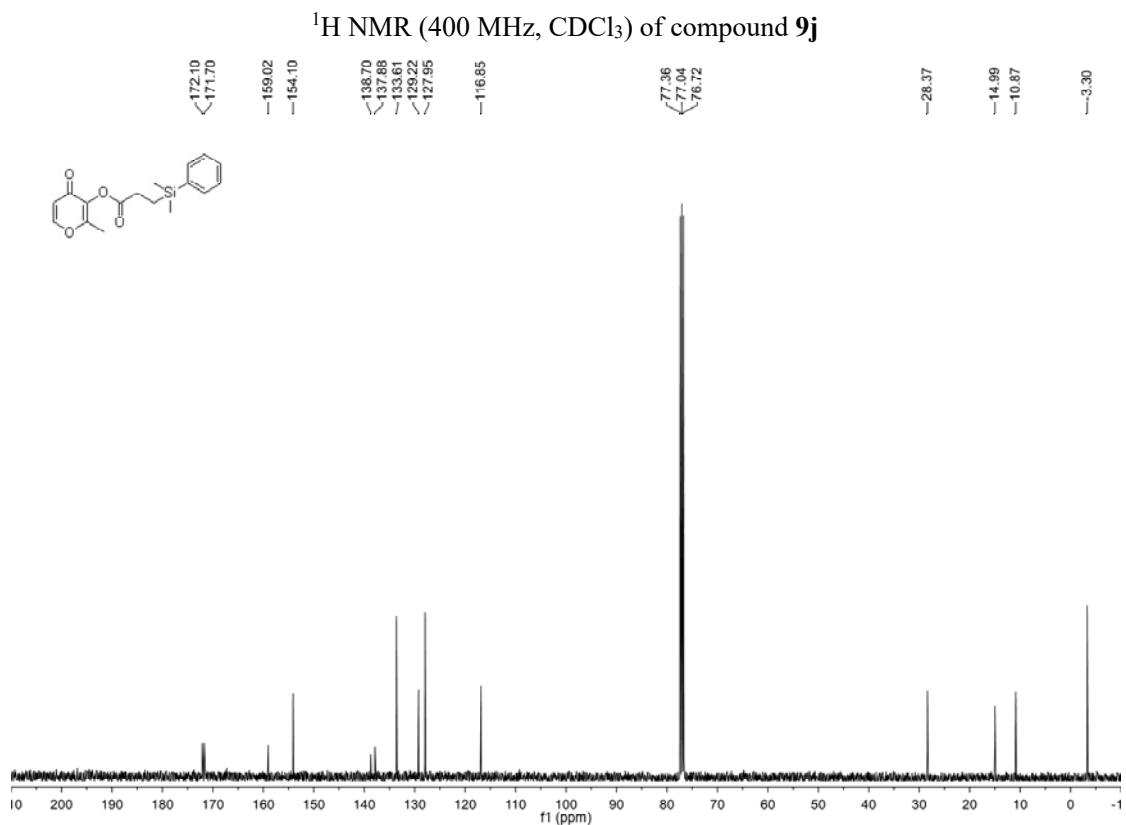

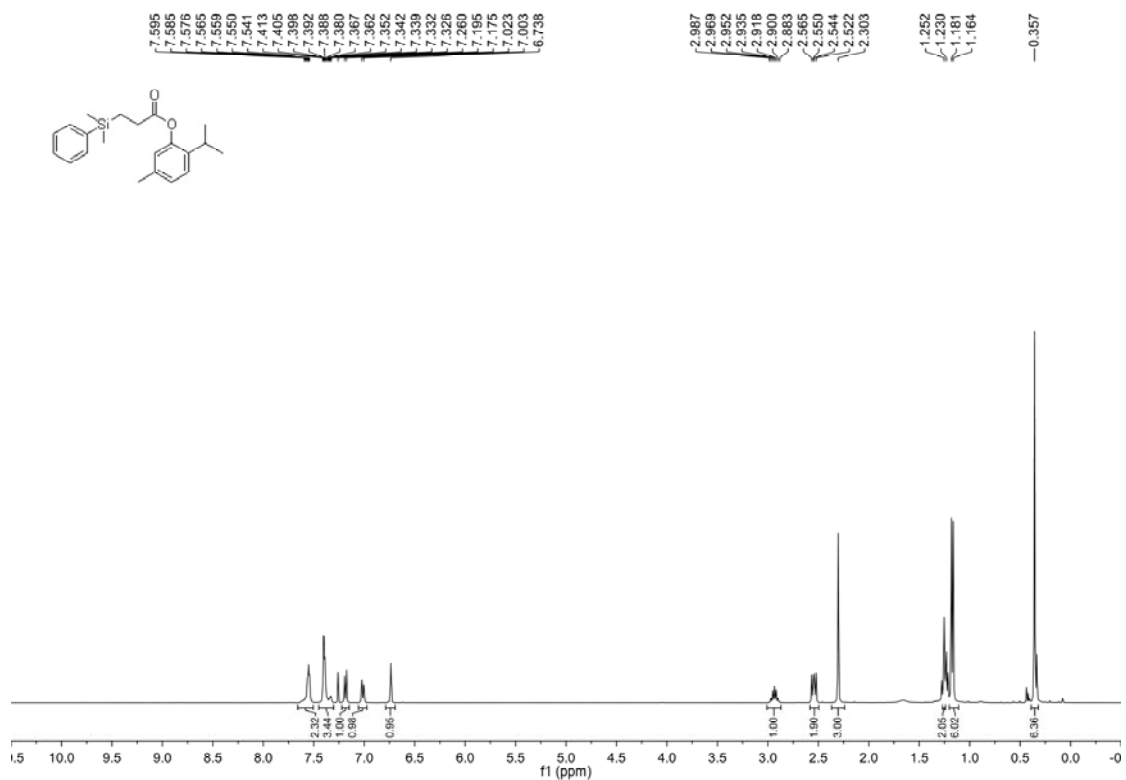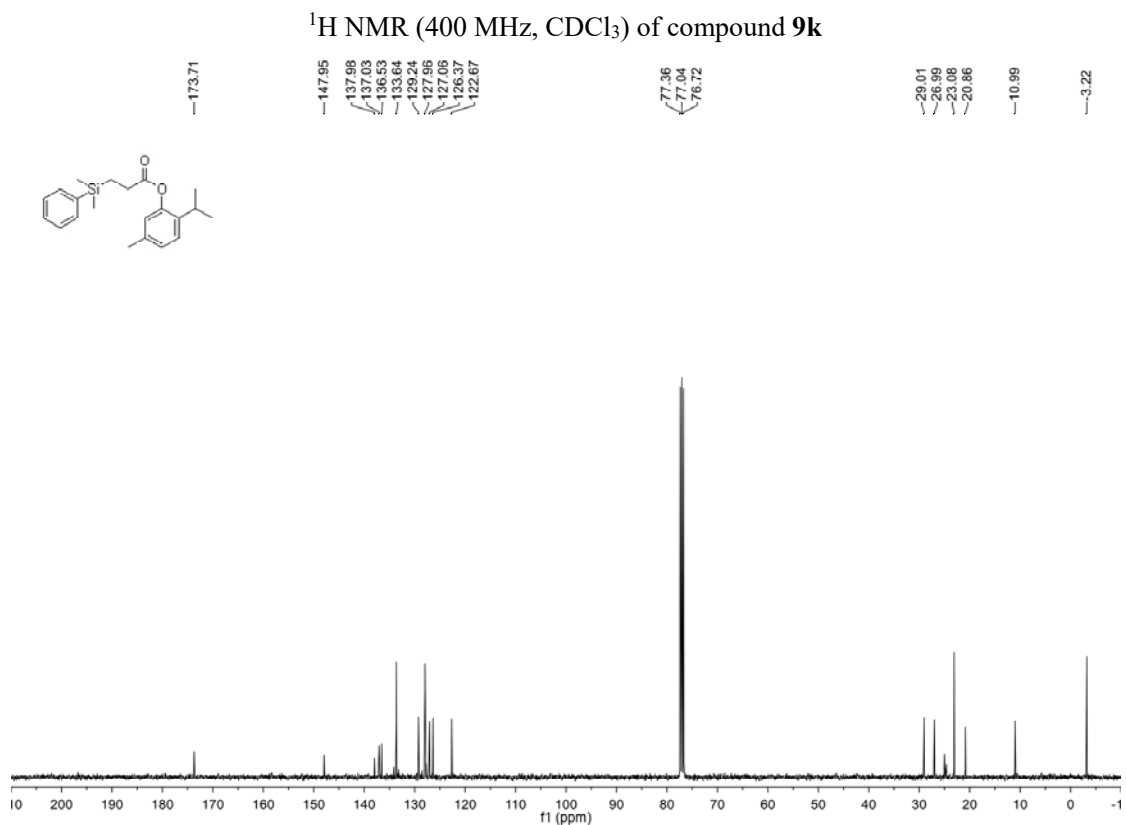

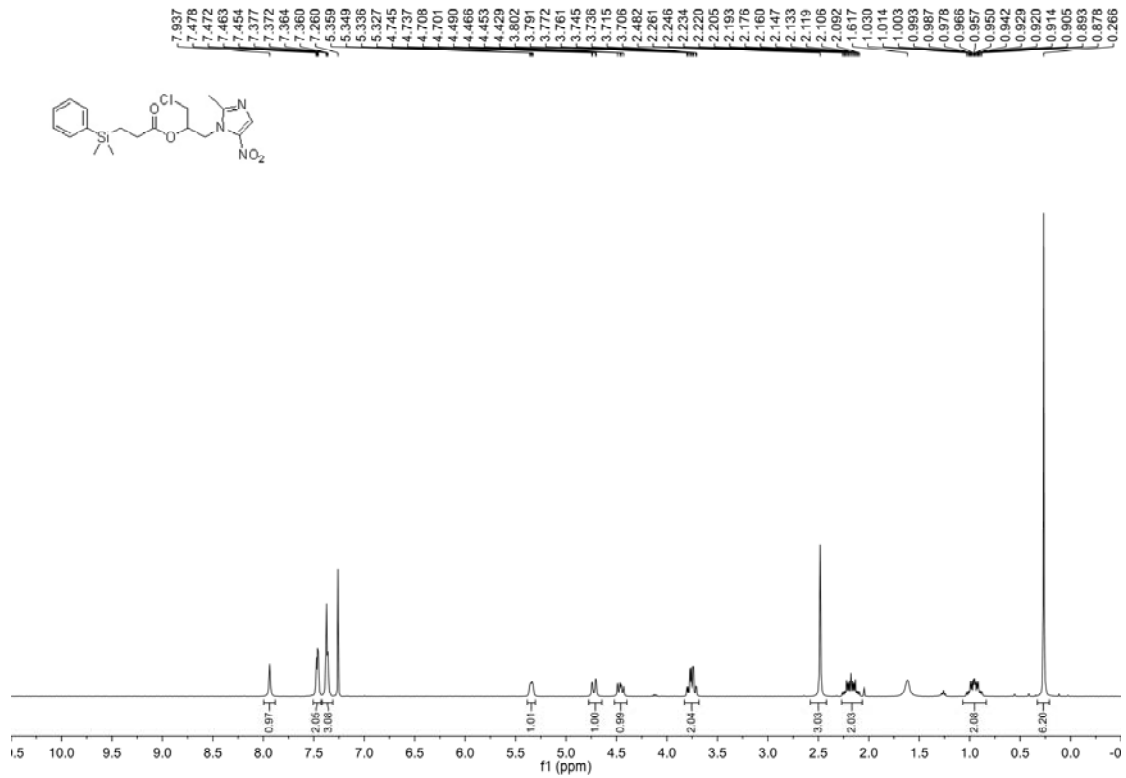

$^1\text{H}$  NMR (400 MHz,  $\text{CDCl}_3$ ) of compound **9I**

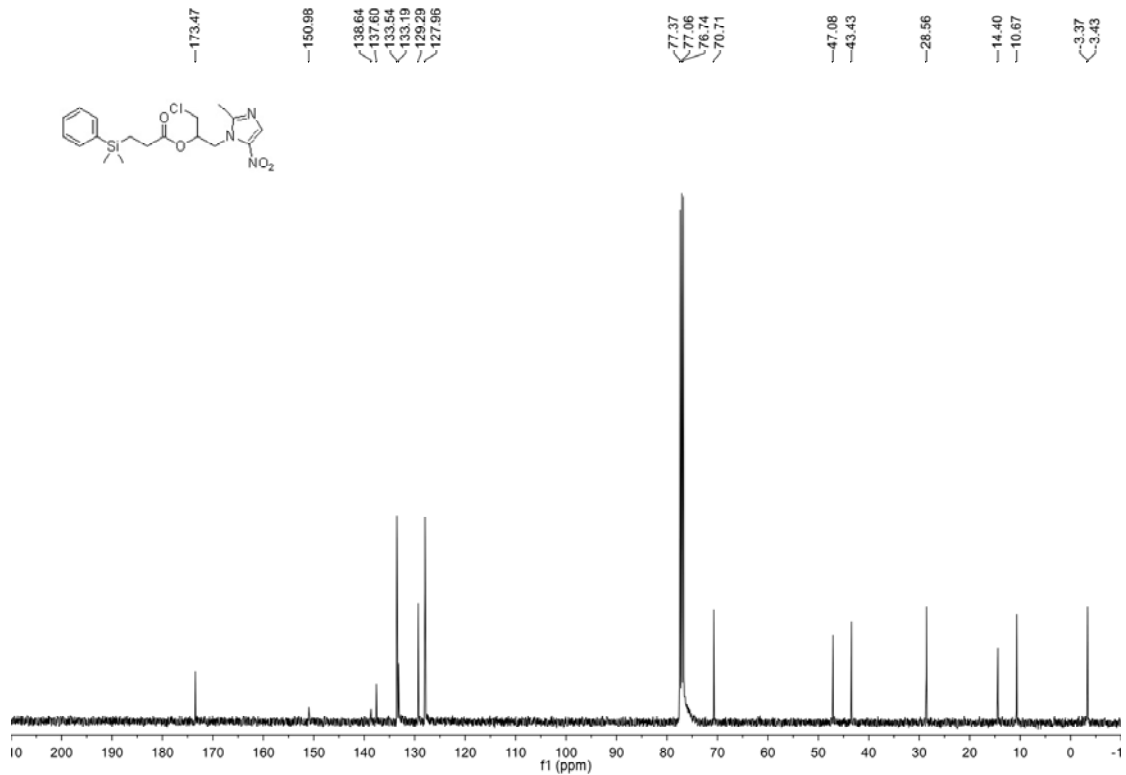

$^{13}\text{C}\{^1\text{H}\}$  NMR (100 MHz,  $\text{CDCl}_3$ ) of compound **9I**

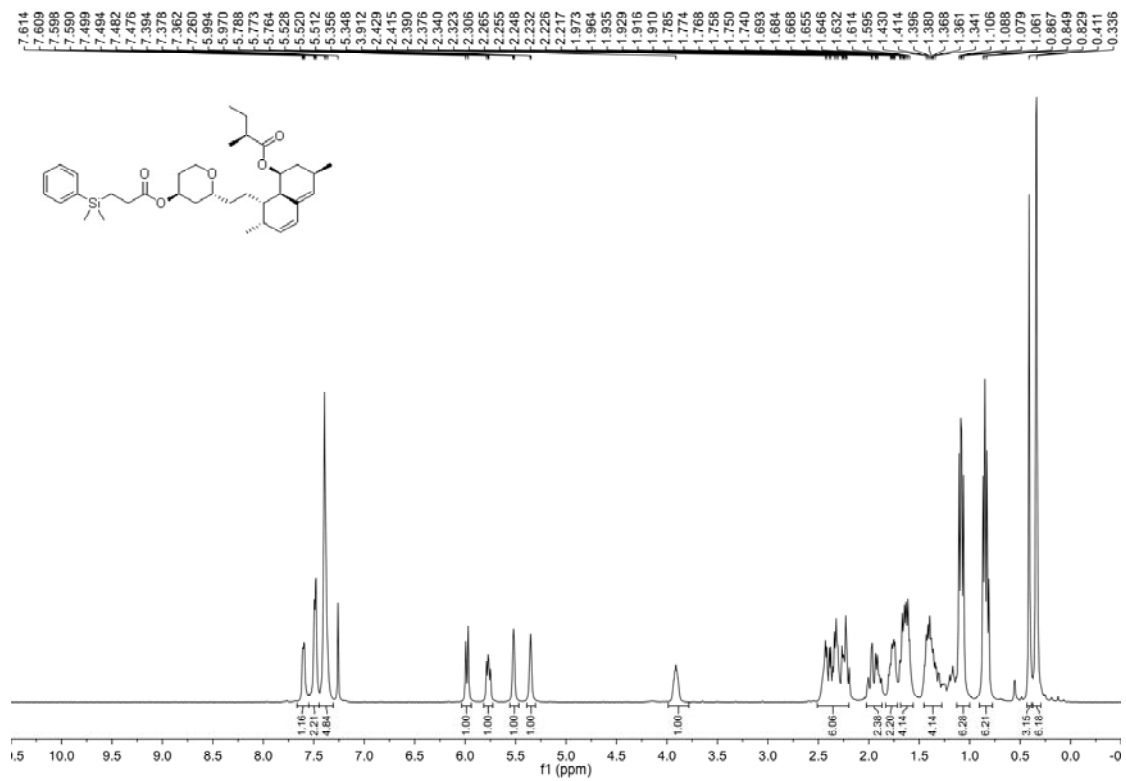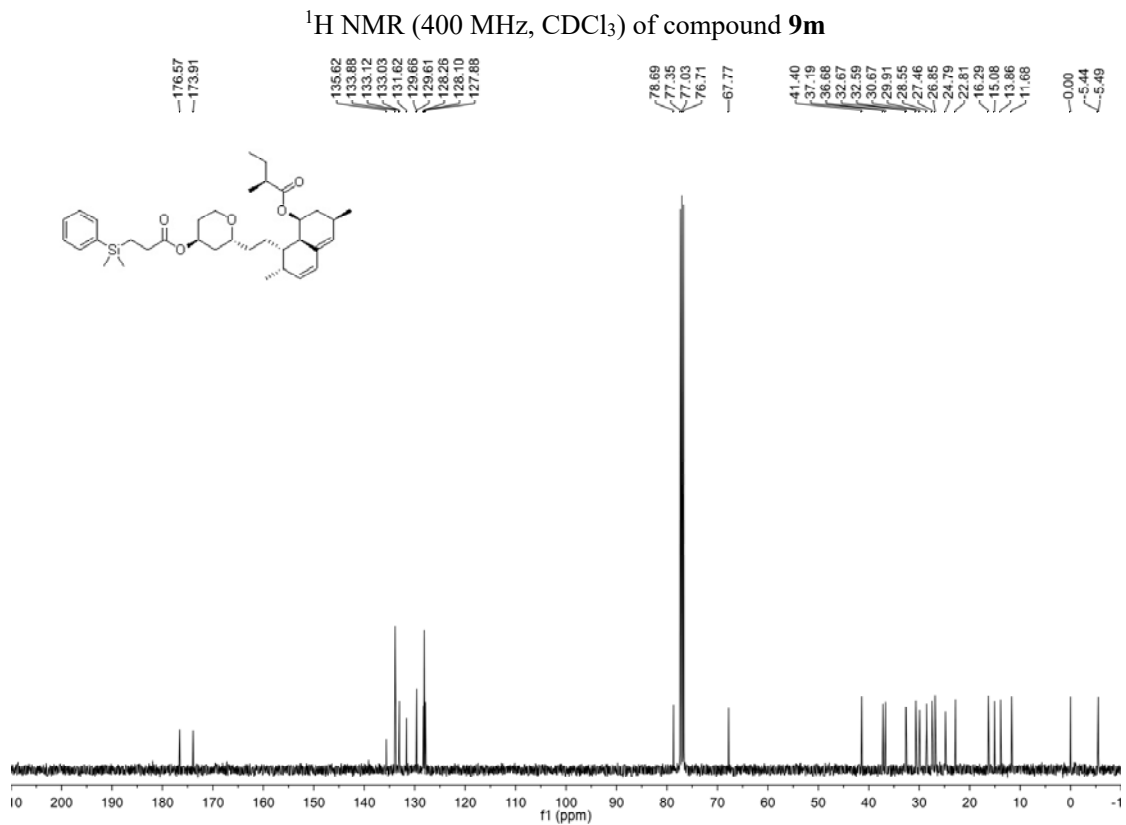

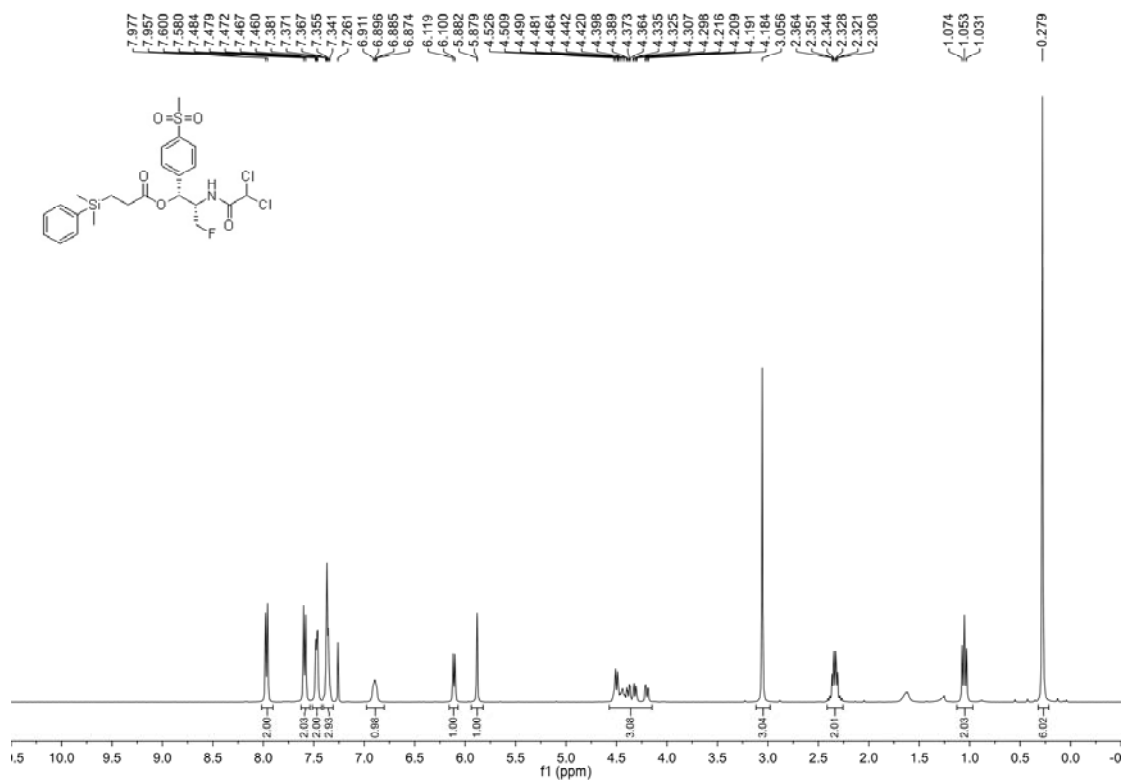

<sup>1</sup>H NMR (400 MHz, CDCl<sub>3</sub>) of compound **9n**

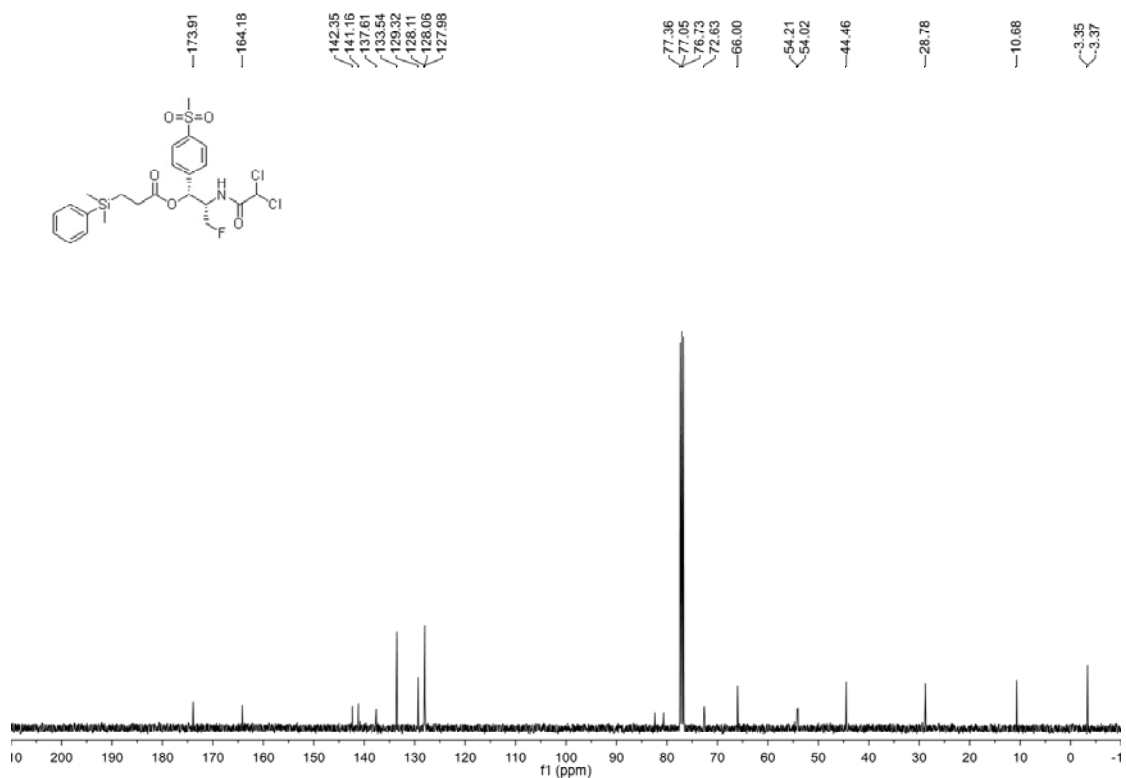

<sup>13</sup>C {<sup>1</sup>H} NMR (100 MHz, CDCl<sub>3</sub>) of compound **9n**

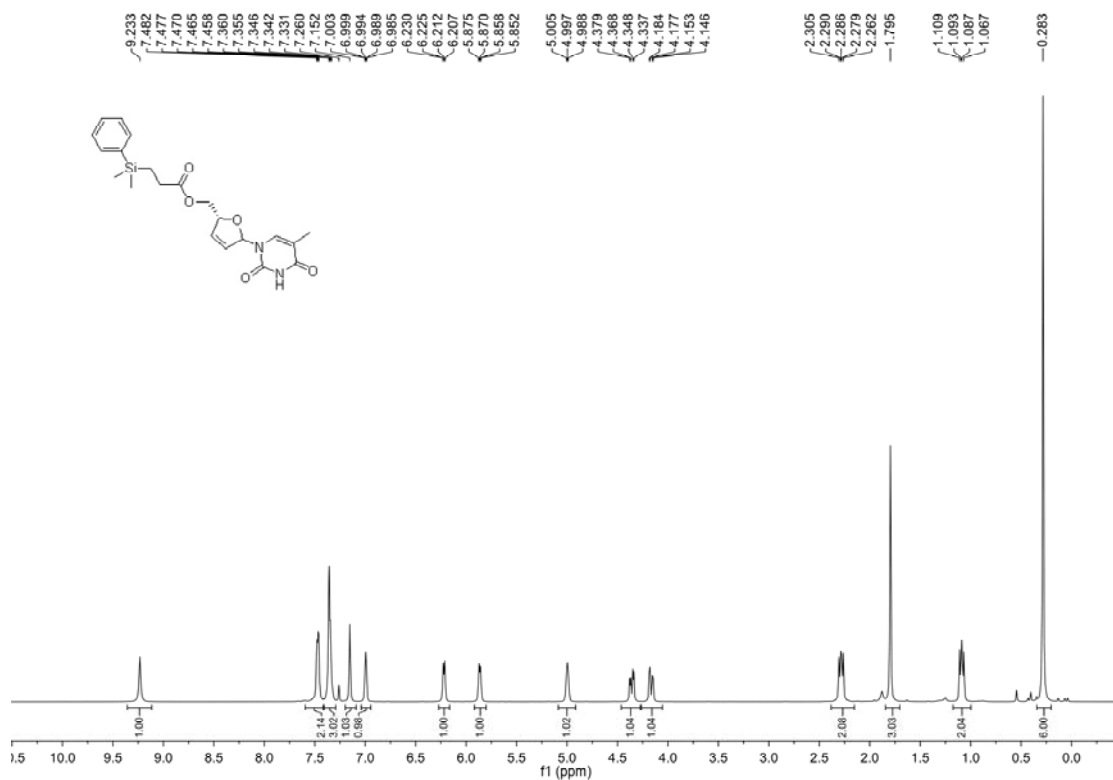

<sup>1</sup>H NMR (400 MHz, CDCl<sub>3</sub>) of compound **9o**

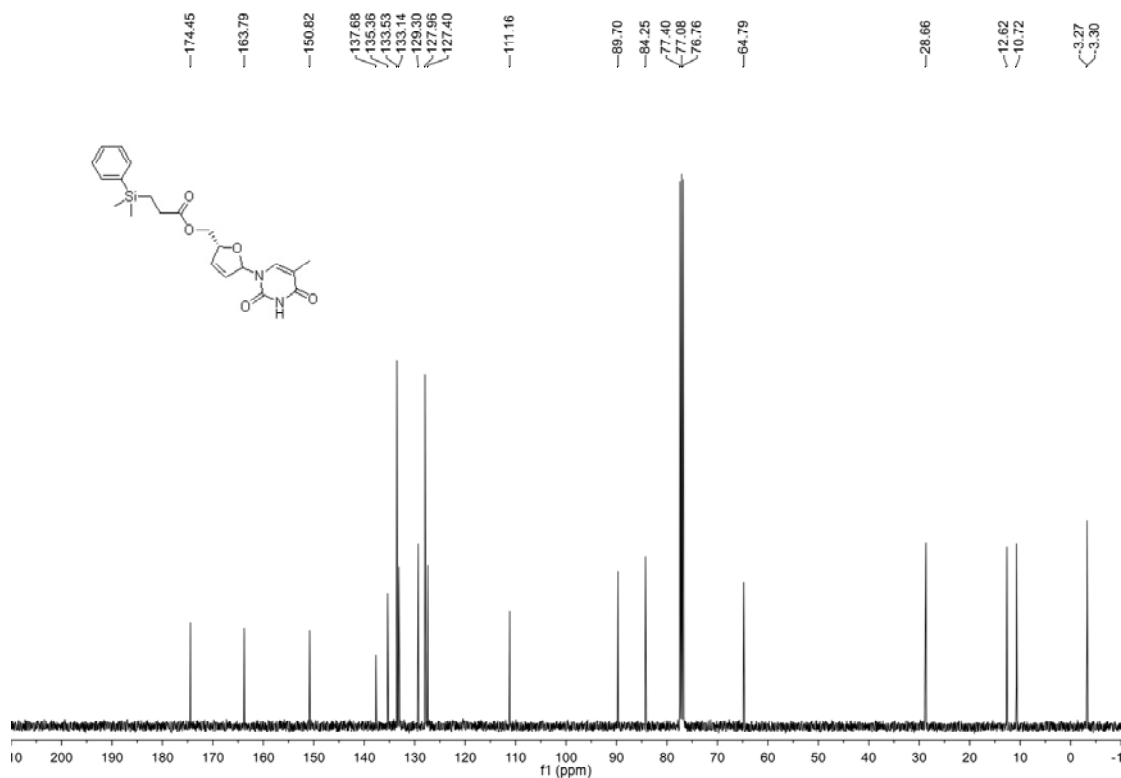

<sup>13</sup>C {<sup>1</sup>H} NMR (100 MHz, CDCl<sub>3</sub>) of compound **9o**

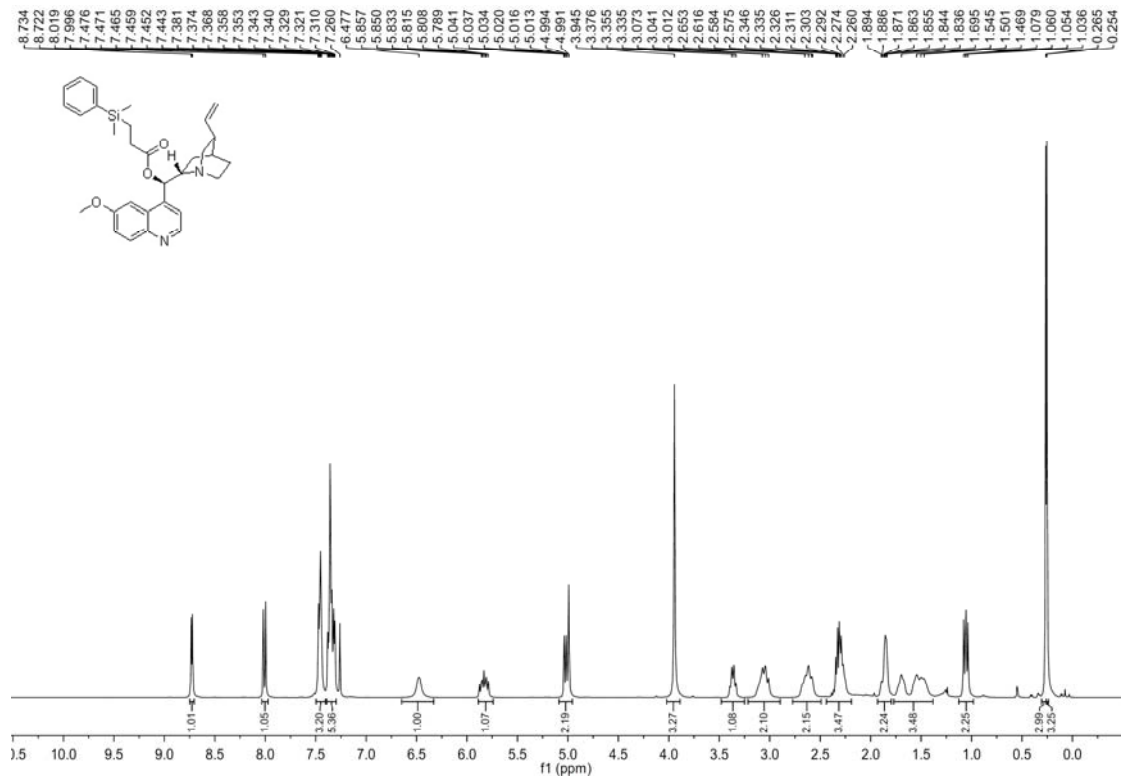

$^1\text{H}$  NMR (400 MHz,  $\text{CDCl}_3$ ) of compound **9p**

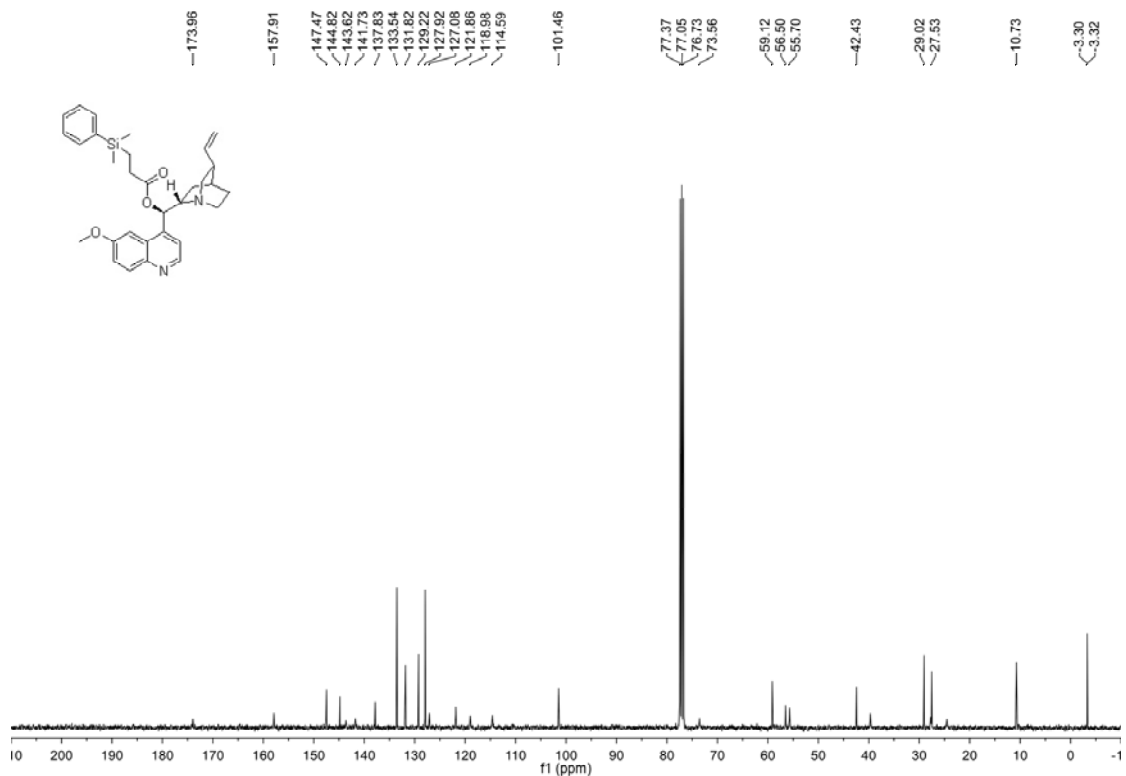

$^{13}\text{C}\{^1\text{H}\}$  NMR (100 MHz,  $\text{CDCl}_3$ ) of compound **9p**

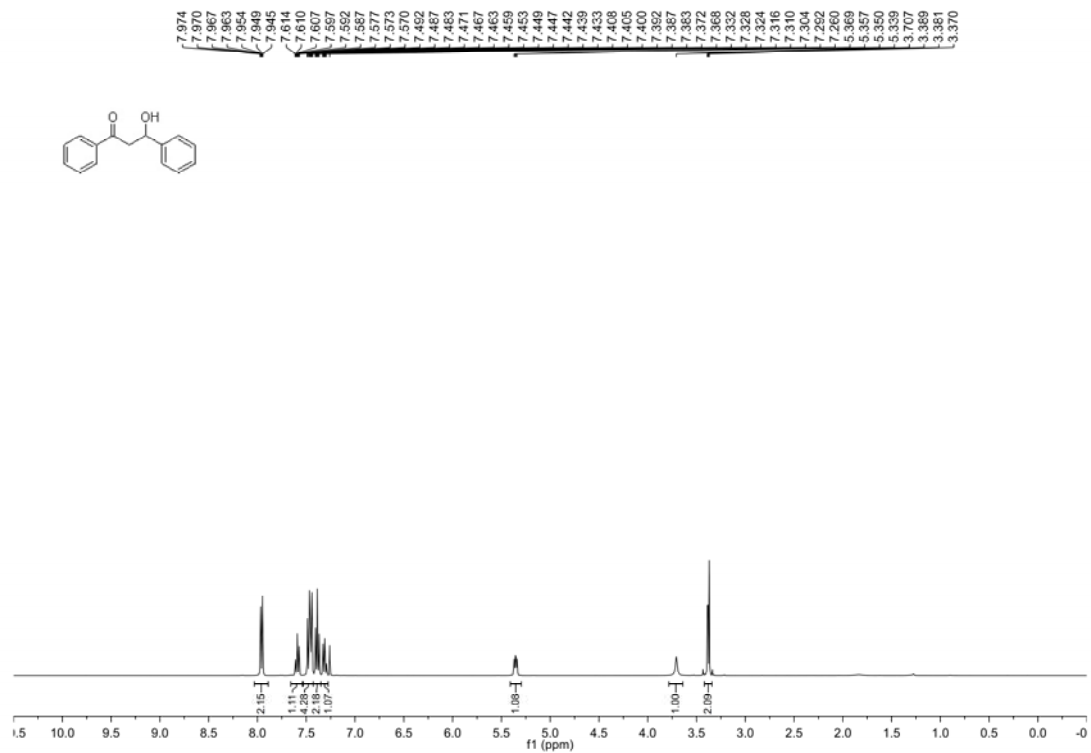

$^1\text{H}$  NMR (400 MHz,  $\text{CDCl}_3$ ) of compound **10**

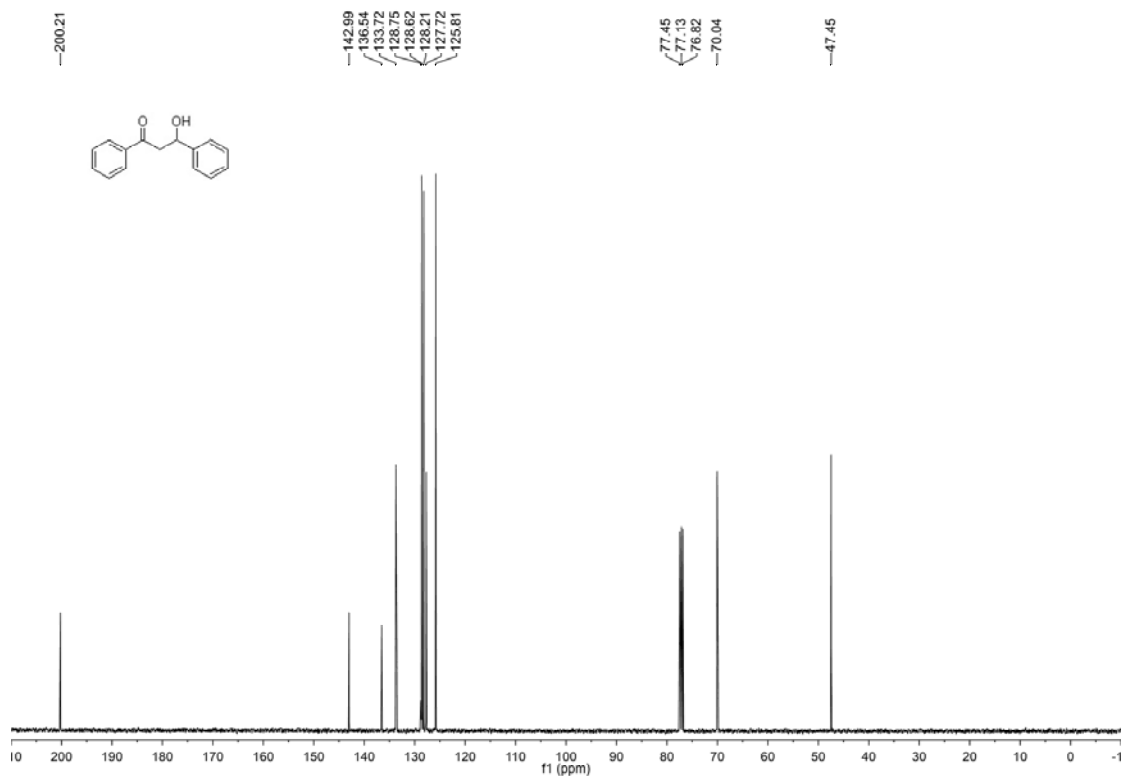

$^{13}\text{C}\{^1\text{H}\}$  NMR (100 MHz,  $\text{CDCl}_3$ ) of compound **10**



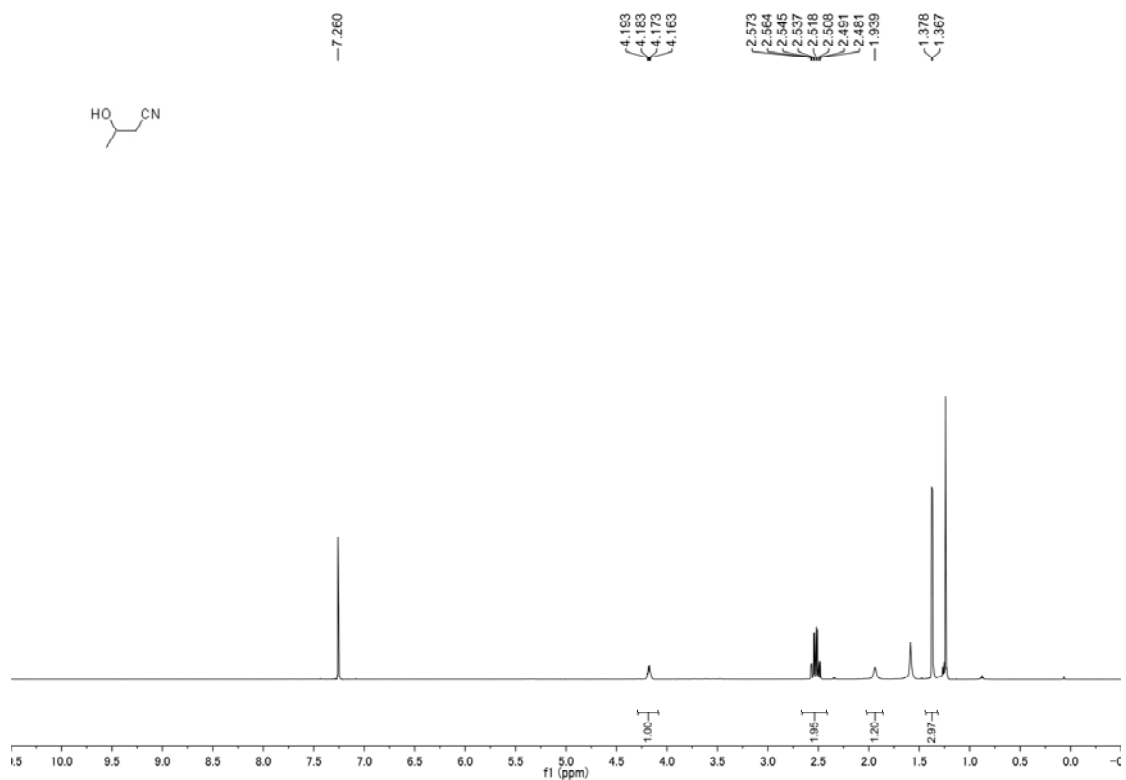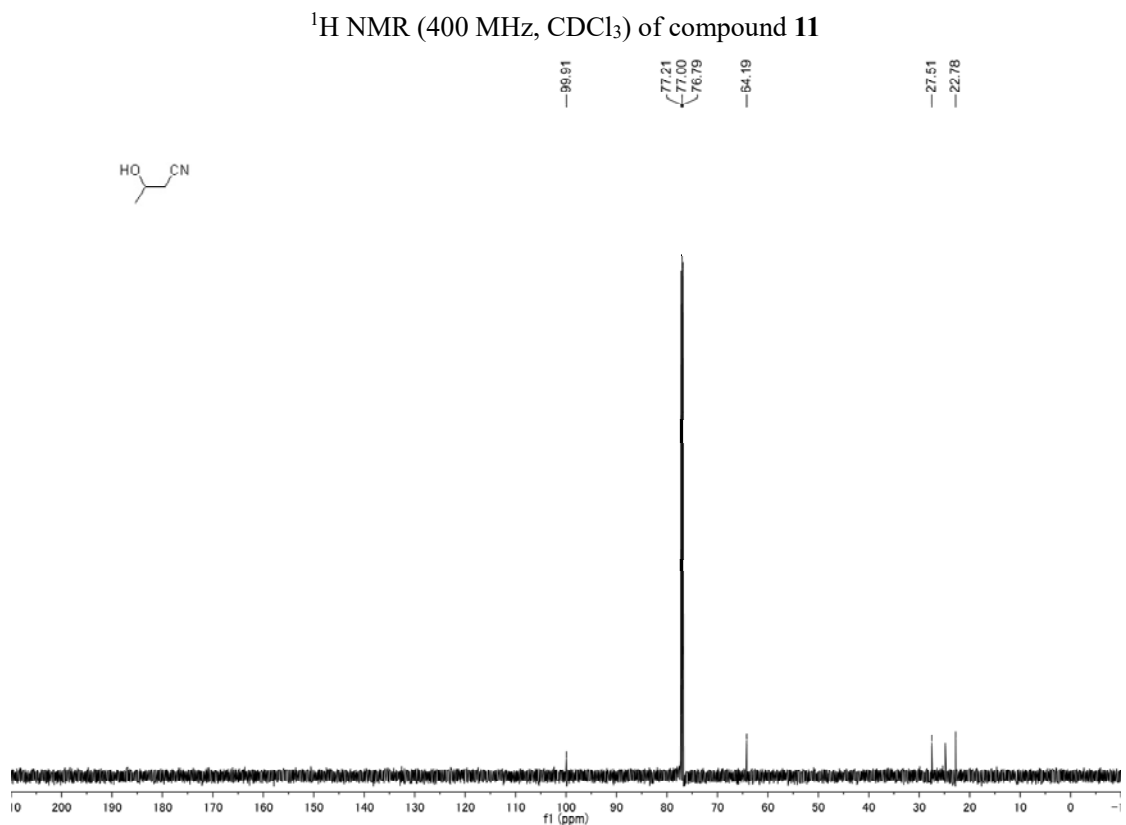

Supplement: d3gc01097j1.pdf [file d3gc01097j1.pdf]
